# Supplementary material
Source: Royal Society of Chemistry journal article supplement (doi:10.1039/d6cc01493c)

## Supporting Information

# Copper-Mediated Photoinduced perfluoroalkylation of Arylsulfonium Salts

Yongfang Yang <sup>a</sup>, Lili Zhao <sup>a</sup>, Shengsheng Luo <sup>a</sup>, Xujuan Jiang <sup>a</sup>, Yanli Yuan <sup>a\*</sup>,  
Xiaojun Zeng<sup>ab\*</sup>

<sup>a</sup> School of Chemistry and Chemical Engineering, Nanchang University, Nanchang, Jiangxi, 330031, China.

<sup>b</sup> Chongqing Research Institute of Nanchang University, Chongqing, 402660, China.

Email: xjzeng@ncu.edu.cn; yuanyanli@ncu.edu.cn

### Table of contents

|                                                                                                                                       |     |
|---------------------------------------------------------------------------------------------------------------------------------------|-----|
| <b>1. General information</b> .....                                                                                                   | S2  |
| <b>2. General Procedure I: Preparation of (DMPU)<sub>2</sub>Zn(C<sub>n</sub>F<sub>2n+1</sub>)<sub>2</sub></b> .....                   | S2  |
| <b>2.1 Preparation of bis(trifluoromethyl)zinc reagent (DMPU)<sub>2</sub>Zn(CF<sub>3</sub>)<sub>2</sub> (2a)</b> .....                | S2  |
| <b>2.2 Preparation of bis(pentafluoroethyl)zinc reagent (DMPU)<sub>2</sub>Zn(C<sub>2</sub>F<sub>5</sub>)<sub>2</sub> (2b)</b> .....   | S3  |
| <b>2.3 Preparation of bis(heptafluoropropyl)zinc reagent (DMPU)<sub>2</sub>Zn(C<sub>3</sub>F<sub>7</sub>)<sub>2</sub> (2c)</b> .....  | S3  |
| <b>2.4 Preparation of bis(nonafluorobutyl)zinc reagent (DMPU)<sub>2</sub>Zn(C<sub>4</sub>F<sub>9</sub>)<sub>2</sub> (2d)</b> .....    | S3  |
| <b>2.5 Preparation of bis(tridecafluorohexyl)zinc reagent (DMPU)<sub>2</sub>Zn(C<sub>6</sub>F<sub>13</sub>)<sub>2</sub> (2e)</b> .... | S4  |
| <b>3. General Procedure II: Synthesis of Ar-TT<sup>+</sup>BF<sub>4</sub><sup>-</sup></b> .....                                        | S4  |
| <b>4. Optimization studies</b> .....                                                                                                  | S6  |
| <b>5. Gram-scale reaction</b> .....                                                                                                   | S9  |
| <b>6. Control experiments</b> .....                                                                                                   | S10 |
| <b>6.1 Radical inhibition experiments</b> .....                                                                                       | S10 |
| <b>6.2 Light on/off experiment</b> .....                                                                                              | S10 |
| <b>6.3 Rationalization of the mechanism</b> .....                                                                                     | S11 |
| <b>7. Characterization of Products</b> .....                                                                                          | S11 |
| <b>8. References</b> .....                                                                                                            | S33 |
| <b>9. NMR Spectra</b> .....                                                                                                           | S35 |

## 1. General information

Unless otherwise noted, all cross-coupling reactions were run under an N<sub>2</sub> atmosphere and all glassware was oven dried before use. The Photo Reaction Setup and LED lamp were purchased from Xuzhou Ai Jia electronic technology Co LED. Chemicals were purchased from Shanghai Haohong Scientific Co., Ltd, Adamas-beta, Energy Chemical, Leyan, bidepharm and were used without further purification. DCE and DMSO were purchased from Adamas-beta and dried with 4A molecular sieves. GC/MS analysis was performed on a Thermo-Fischer Scientific ISQ QD single quadrupole mass spectrometer. Thin-layer chromatography (TLC) was performed on 0.20 mm silica gel F-254 plates, with resulting chromatograms visualized by fluorescence quenching or KMnO<sub>4</sub> stain. <sup>1</sup>H NMR, <sup>13</sup>C NMR, and <sup>19</sup>F NMR spectra were recorded at 297K on a Bruker AVANCE AV 400 (400 MHz, 101MHz and 376 MHz) spectrometer. Data is reported in ppm using CDCl<sub>3</sub> as the solvent unless otherwise specified. Data is reported as: Chemical shifts (δ), multiplicity (s = singlet, d = doublet, t = triplet, q = quartet, m = multiple, br = broad), coupling constants (Hz), integrated intensity.

## 2. General Procedure I: Preparation of (DMPU)<sub>2</sub>Zn(C<sub>n</sub>F<sub>2n+1</sub>)<sub>2</sub>

Bis(perfluoroalkyl)zinc reagent (DMPU)<sub>2</sub>Zn(C<sub>n</sub>F<sub>2n+1</sub>)<sub>2</sub> **2a-2e** was synthesized according to Mikami's procedure.<sup>1</sup>

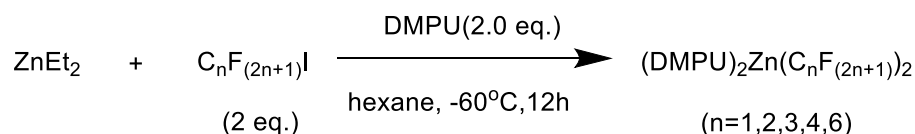

### 2.1 Preparation of bis(trifluoromethyl)zinc reagent (DMPU)<sub>2</sub>Zn(CF<sub>3</sub>)<sub>2</sub> (**2a**)

To an oven-dried 100 mL two-neck round-bottom flask equipped with a magnetic stir bar were added hexane (15 mL) and DMPU (2.4 mL, 20 mmol) under an argon atmosphere. Trifluoromethyl iodide (2.8 mL, 25 mmol) was added to the solution. A diethyl zinc solution (1.0 M in hexanes, 10 mL, 10 mmol) was then added dropwise at -60 °C. After the reaction mixture was stirred at -5 °C for 24 h, the precipitate was obtained. After removing the solution, the precipitate obtained was washed with hexane

(50 mL) threetimes and dried under a vacuum to give  $(\text{DMPU})_2\text{Zn}(\text{CF}_3)_2$  as a white powder (3.4 g, 72% yield).

## 2.2 Preparation of bis(pentafluoroethyl)zinc reagent $(\text{DMPU})_2\text{Zn}(\text{C}_2\text{F}_5)_2$ (2b)

To an oven-dried 50-mL two-neck round-bottomed flask equipped with a magnetic stir bar were added hexane (15 mL) and DMPU (2.75 mL, 22.8 mmol) under argon atmosphere. Pentafluoroethyl iodide (ca. 6.9 g, 28 mmol) was bubbled into the solution at 0 °C. Diethyl zinc solution (1.0 M in hexanes, 12 mL, 12 mmol) was then added dropwise at -60 °C. After the reaction mixture was stirred at 0 °C for 48 h, the precipitate was obtained. After removing the solution, the precipitate obtained was washed with  $\text{Et}_2\text{O}$  (20 mL) three times and dried under vacuum to give  $(\text{DMPU})_2\text{Zn}(\text{C}_2\text{F}_5)_2$  as a white powder (4.9 g, 77% yield).

## 2.3 Preparation of bis(heptafluoropropyl)zinc reagent $(\text{DMPU})_2\text{Zn}(\text{C}_3\text{F}_7)_2$ (2c)

To an oven-dried 50-mL two-neck round-bottomed flask equipped with a magnetic stir bar were added hexane (8 mL) and DMPU (1.3 mL, 10 mmol) under argon atmosphere. Heptafluoropropyl iodide (ca. 3.8 g, 12.9 mmol) was added to the solution. Diethyl zinc solution (1.0 M in hexanes, 5 mL, 5 mmol) was then added dropwise at -60 °C. After the reaction mixture was stirred at -20 °C for 48 h, the precipitate was obtained. After removing the solution, the precipitate obtained was washed with hexane (15 mL) three times and dried under vacuum to give  $(\text{DMPU})_2\text{Zn}(\text{C}_3\text{F}_7)_2$  as a white powder (2.7 g, 82% yield).

## 2.4 Preparation of bis(nonafluorobutyl)zinc reagent $(\text{DMPU})_2\text{Zn}(\text{C}_4\text{F}_9)_2$ (2d)

To an oven-dried 50-mL two-neck round-bottomed flask equipped with a magnetic stir bar were added hexane (8 mL) and DMPU (1.3 mL, 10 mmol) under argon atmosphere. Nonafluorobutyl iodide (ca. 4.5 g, 12.9 mmol) was added to the solution. Diethyl zinc solution (1.0 M in hexanes, 5 mL, 5 mmol) was then added dropwise at -60 °C. After the reaction mixture was stirred at 0 °C for 48 h, the precipitate was obtained. After removing the solution, the precipitate obtained was washed with hexane

(15 mL) three times and dried under vacuum to give  $(\text{DMPU})_2\text{Zn}(\text{C}_4\text{F}_9)_2$  as a white powder (2.8 g, 74% yield).

### 2.5 Preparation of bis(tridecafluorohexyl)zinc reagent $(\text{DMPU})_2\text{Zn}(\text{C}_6\text{F}_{13})_2$ (2e)

To an oven-dried 50-mL two-neck round-bottomed flask equipped with a magnetic stir bar were added hexane (8 mL) and DMPU (1.3 mL, 10 mmol) under argon atmosphere. Tridecafluorohexyl iodide (ca. 5.7 g, 12.9 mmol) was added to the solution. Diethyl zinc solution (1.0 M in hexanes, 5 mL, 5 mmol) was then added dropwise at -60 °C. After the reaction mixture was stirred at 0 °C for 48 h, the precipitate was obtained. After removing the solution, the precipitate obtained was washed with hexane (15 mL) three times and dried under vacuum to give  $(\text{DMPU})_2\text{Zn}(\text{C}_6\text{F}_{13})_2$  as a white powder (3.3 g, 70% yield).

### 3. General Procedure II: Synthesis of $\text{Ar-TT}^+\text{BF}_4^-$

All the following thianthrenium salts were synthesized as described in the literature. The thianthrenium salts **3S**,<sup>2</sup> **4S**,<sup>3</sup> **5S**,<sup>2</sup> **6S**,<sup>2</sup> **7S**,<sup>4</sup> **8S**,<sup>5</sup> **9S**,<sup>2</sup> **10S**,<sup>3</sup> **11S**,<sup>4</sup> **12S**,<sup>6</sup> **13S**,<sup>7</sup> **14S**,<sup>3</sup> **15S**,<sup>3</sup> **16S**,<sup>3</sup> **17S**,<sup>6</sup> **18S**,<sup>3</sup> **19S**,<sup>3</sup> **20S**,<sup>3</sup> **21S**,<sup>3</sup> **22S**,<sup>4</sup> **23S**,<sup>3</sup> **24S**,<sup>4</sup> **25S**,<sup>8</sup> **26S**,<sup>5</sup> **27S**,<sup>9</sup> **28S**,<sup>4</sup> **29S**,<sup>3</sup> **30S**,<sup>4</sup> **31S**,<sup>4</sup> **32S**,<sup>3</sup> **33S**<sup>3</sup> are known compounds and were prepared in accordance to references. All substrates were prepared according to the reported literatures.

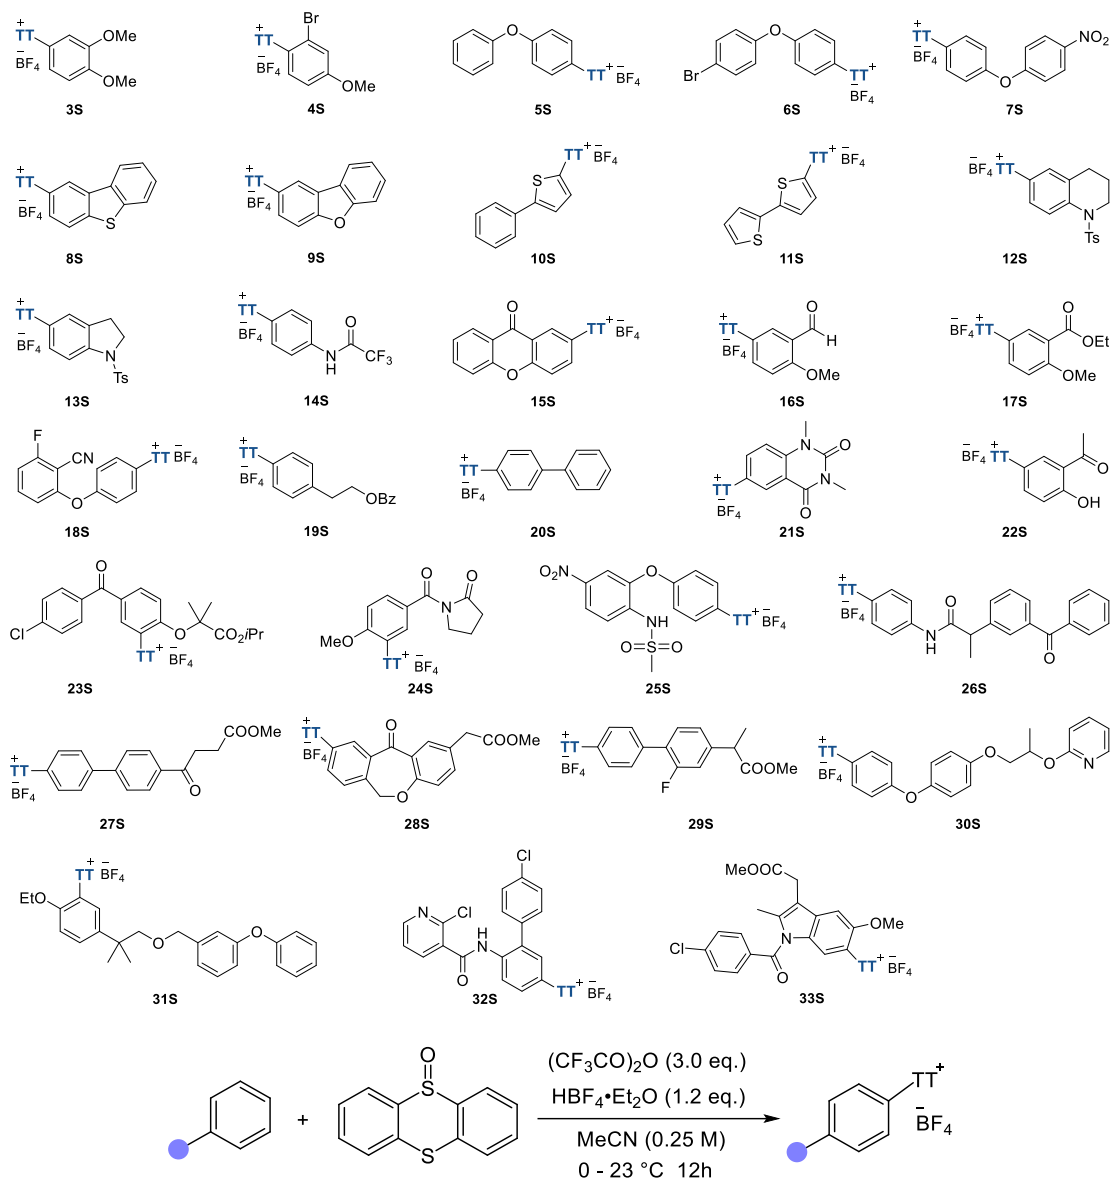

Under an ambient atmosphere, a 20-ml glass vial was charged with arene (5.0 mmol, 1.0 equiv.) and MeCN (5.0 mL, 1.0 M). After cooling to 0 °C, HBF<sub>4</sub>·OEt<sub>2</sub> (0.82 mL, 0.97 g, 6.0 mmol, 1.2 equiv.) and thianthrene 5-oxide (1.16 g, 5.0 mmol, 1.0 equiv.) was added to the vial while stirring the mixture, leading to a suspension. Subsequently, trifluoroacetic anhydride (2.1 mL, 3.1 g, 15 mmol, 3.0 equiv.) was added in one portion at 0 °C, resulting in a color change to deep purple. Subsequently, the reaction mixture was allowed to reach 23 °C and stirred for 12 h. The solution was diluted with DCM (5 mL) and poured onto a mixture of DCM (30 mL) and saturated aqueous NaHCO<sub>3</sub> solution (20 mL). After stirring for 5 min at 23 °C, the mixture was poured into a separating funnel, and the layers were separated. The DCM layer was washed with

aqueous NaBF<sub>4</sub> solution (10% w/w, 4 × ca. 20 mL). The DCM layer was dried over Na<sub>2</sub>SO<sub>4</sub>, filtered, and the solvent was removed under reduced pressure. The residue was purified by chromatography on silica gel eluting with DCM/MeOH (30:1, v/v), then the solvent was removed in vacuo to afford the thianthrenium salt.

#### 4. Optimization studies

**General procedure:** In a nitrogen-filled glovebox, to an 8 mL vial equipped with a stir bar were added sequentially stoichiometric amounts of CuCl (0.1 mmol, 1 equiv.), BINAP (0.01 mmol, 0.1 equiv.), NaOAc (0.2 mmol, 2 equiv.), and (DMPU)<sub>2</sub>Zn(C<sub>n</sub>F<sub>2n+1</sub>)<sub>2</sub> (0.08 mmol, 0.8 equiv.). Then, the solvent was added, and the mixture was stirred at room temperature for 10 minutes. Subsequently, thianthrenium salt (0.1 mmol, 1 equiv.) was added, then put it under a 20W LEDs, and stirring was continued for 5 hours. After completion of the reaction, the mixture was diluted with ethyl acetate, and the crude product was purified by flash chromatography.

The light source used for photochemical experiments was a Blue LEDs (20 W), purchased from Taobao; [https://item.taobao.com/item.htm?id=623744554239&mi\\_id=00004FF39FXtmWCDGfIdoxpxSxtVk0SwPjtDyavcsGwJjs0&spm=tbpc.boughlist.suborder\\_itemtitle.1.75332e8dNhsf4L&sku\\_properties=13381687%3A10122;](https://item.taobao.com/item.htm?id=623744554239&mi_id=00004FF39FXtmWCDGfIdoxpxSxtVk0SwPjtDyavcsGwJjs0&spm=tbpc.boughlist.suborder_itemtitle.1.75332e8dNhsf4L&sku_properties=13381687%3A10122;) Manufacturer: Xuzhou Ai Jia electronic technology Co LED; Broadband source: λ = 450-455 nm;

Material of the irradiation vessel: borosilicate reaction bottle.

Distance from the light source to the irradiation vessel: 2.0 cm (Not use any filters)

**Table S1** The effect of catalysts on the nonafluorobutylation of thianthrenium salts <sup>a-b</sup>.

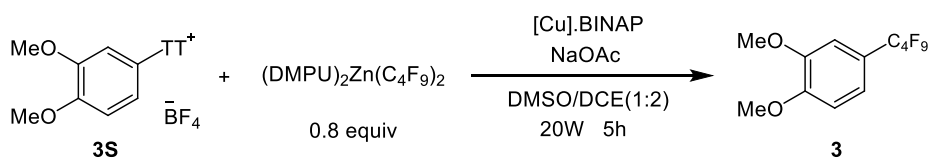

| Entry | Catalyst | Yield (%) <sup>b</sup> |
|-------|----------|------------------------|
| 1     | CuCl     | 89                     |
| 2     | CuI      | 78                     |

|    |                                       |       |
|----|---------------------------------------|-------|
| 3  | CuCl (20 mol%)                        | 32    |
| 4  | Cu(MeCN) <sub>4</sub> BF <sub>4</sub> | 38    |
| 5  | PdCl <sub>2</sub>                     | trace |
| 6  | Cu(MeCN) <sub>4</sub> PF <sub>6</sub> | 13    |
| 7  | CuOAc                                 | 40    |
| 8  | CuBr                                  | 65    |
| 9  | Cu(OTf) <sub>2</sub>                  | 50    |
| 10 | No Cu                                 | nd    |

<sup>a</sup> Reaction conditions: **3S** (0.1 mmol), [Cu] (0.1 mmol), BINAP (10 mol%), NaOAc (0.2 mmol), (DMPU)<sub>2</sub>Zn(C<sub>4</sub>F<sub>9</sub>)<sub>2</sub> (0.08 mmol), DMSO/DCE (1:2) (1.0 mL), 20W LEDs, 5h. <sup>b</sup> Yields determined by <sup>19</sup>F NMR using PhCF<sub>3</sub> as internal standard.

**Table S2** The effect of ligands on the nonafluorobutylation of thianthrenium salts <sup>a-b</sup>.

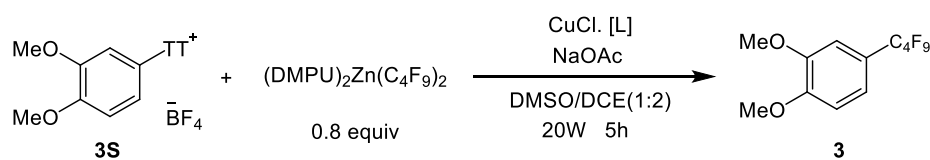

| Entry    | Ligand       | Yield (%) <sup>b</sup> |
|----------|--------------|------------------------|
| <b>1</b> | <b>BINAP</b> | <b>89</b>              |
| 2        | RuPhos       | trace                  |
| 3        | No BINAP     | nd                     |
| 4        | Dppf         | nd                     |
| 5        | XPhos        | nd                     |

<sup>a</sup> Reaction conditions: **3S** (0.1 mmol), CuCl (0.1 mmol), Ligand (10 mol%), NaOAc (0.2 mmol), (DMPU)<sub>2</sub>Zn(C<sub>4</sub>F<sub>9</sub>)<sub>2</sub> (0.08 mmol), DMSO/DCE (1:2) (1.0 mL), 20W LEDs, 5h. <sup>b</sup> Yields determined by <sup>19</sup>F NMR using PhCF<sub>3</sub> as internal standard.

**Table S3** The effect of solvent nonafluorobutylation of thianthrenium salts <sup>a-b</sup>.

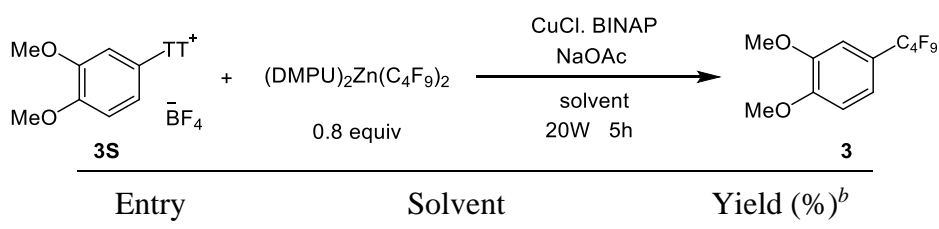

|          |                           |           |
|----------|---------------------------|-----------|
| <b>1</b> | <b>DMSO/DCE (v/v=1/2)</b> | <b>89</b> |
| 2        | DMSO                      | 35        |
| 3        | 1,4-dioxane               | 13        |
| 4        | THF                       | 16        |
| 5        | DCE                       | 42        |
| 6        | DMSO/DCE (v/v=1/1)        | 68        |
| 7        | DMSO/DCE (v/v=2/1)        | 52        |
| 8        | MeCN                      | nd        |

<sup>a</sup> Reaction conditions: **3S** (0.1 mmol), CuCl (0.1 mmol), BINAP (10 mol%), NaOAc (0.2 mmol), (DMPU)<sub>2</sub>Zn(C<sub>4</sub>F<sub>9</sub>)<sub>2</sub> (0.08 mmol), solvent (1.0 mL), 20W LEDs, 5h. <sup>b</sup> Yields determined by <sup>19</sup>F NMR using PhCF<sub>3</sub> as internal standard.

**Table S4** The effect of base nonafluorobutylation of thianthrenium salts <sup>a-b</sup>.

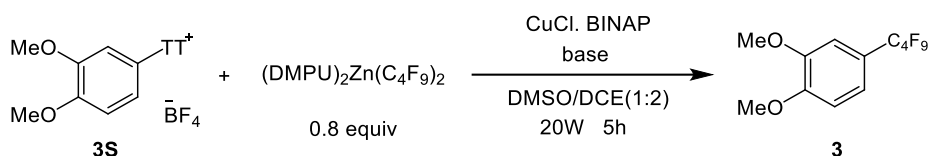

| Entry    | Base                            | Yield (%) <sup>b</sup> |
|----------|---------------------------------|------------------------|
| <b>1</b> | <b>NaOAc</b>                    | <b>89</b>              |
| 2        | t-BuOK                          | trace                  |
| 3        | Cs <sub>2</sub> CO <sub>3</sub> | 6                      |
| 4        | K <sub>3</sub> PO <sub>4</sub>  | 9                      |
| 5        | KOAc                            | 14                     |
| 6        | LiOMe                           | trace                  |
| 7        | Na <sub>2</sub> CO <sub>3</sub> | trace                  |
| 8        | K <sub>2</sub> CO <sub>3</sub>  | trace                  |

<sup>a</sup> Reaction conditions: **3S** (0.1 mmol), CuCl (0.1 mmol), BINAP (10 mol%), base (0.2 mmol), (DMPU)<sub>2</sub>Zn(C<sub>4</sub>F<sub>9</sub>)<sub>2</sub> (0.08 mmol), DMSO/DCE (1.0 mL), 20W LEDs, 5h. <sup>b</sup> Yields determined by <sup>19</sup>F NMR using PhCF<sub>3</sub> as internal standard.

**Table S5** The effect of LEDs nonafluorobutylation of thianthrenium salts <sup>a-b</sup>.

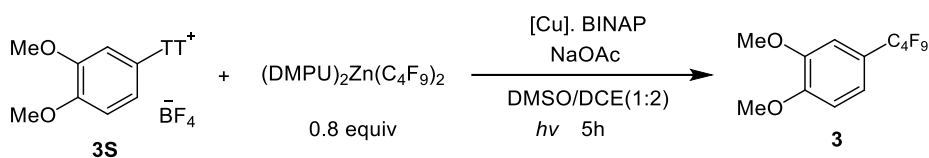

| Entry    | LEDs       | Yield (%) <sup>b</sup> |
|----------|------------|------------------------|
| <b>1</b> | <b>20W</b> | <b>89</b>              |
| 2        | \          | nd                     |
| 3        | 5W         | 48                     |
| 4        | 40W        | 56                     |

<sup>a</sup> Reaction conditions: **3S** (0.1 mmol), CuCl (0.1 mmol), BINAP (10 mol%), NaOAc (0.2 mmol), (DMPU)<sub>2</sub>Zn(C<sub>4</sub>F<sub>9</sub>)<sub>2</sub> (0.08 mmol), DMSO/DCE (1.0 mL), 20W LEDs, 5h. <sup>b</sup> Yields determined by <sup>19</sup>F NMR using PhCF<sub>3</sub> as internal standard.

## 5. Gram-scale reaction

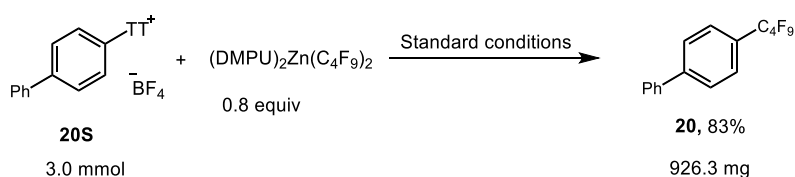

In a nitrogen-filled glovebox, to a 100 mL vial equipped with a stir bar were added sequentially stoichiometric amounts of CuCl (3 mmol, 1 equiv.), BINAP (0.3 mmol, 0.1 equiv.), NaOAc (6 mmol, 2 equiv.), and (DMPU)<sub>2</sub>Zn(C<sub>4</sub>F<sub>9</sub>)<sub>2</sub> (2.4 mmol, 0.8 equiv.). Then, DMSO/DCE was added, and the mixture was stirred at room temperature for 10 minutes. Subsequently, **20S** (1.3 g, 3mmol, 1 equiv.) was added, then put it under a 20W LEDs, and stirring was continued for 5 hours. After completion of the reaction, the mixture was diluted with ethyl acetate, and the crude product was purified by flash chromatography. And **20** was detected 926.3 mg (83% yield).

## 6. Control experiments

### 6.1 Radical inhibition experiments

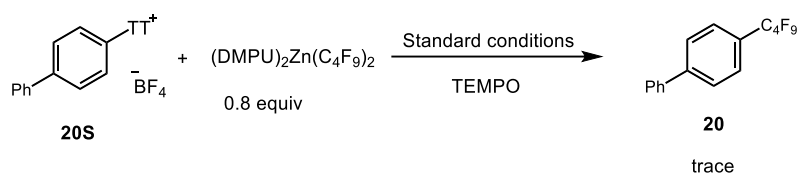

In a nitrogen-filled glovebox, to an 8 mL vial equipped with a stir bar were added sequentially stoichiometric amounts of CuCl (0.1 mmol, 1 equiv.), BINAP (0.01 mmol, 0.1 equiv.), NaOAc (0.2 mmol, 2 equiv.), and  $(\text{DMPU})_2\text{Zn}(\text{C}_4\text{F}_9)_2$  (0.08 mmol, 0.8 equiv.). Then, DMSO/DCE was added, and the mixture was stirred at room temperature for 10 minutes. Subsequently, **20S** (45.7 mg, 0.1 mmol, 1 equiv.) was added, then put it under a 20W LEDs, and stirring was continued for 5 hours. And **20** was detected trace when add TEMPO (1 equiv.) as additive (Yields determined by  $^{19}\text{F}$  NMR using  $\text{PhCF}_3$  as internal standard).

### 6.2 Light on/off experiment

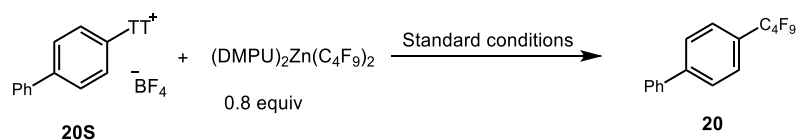

In a nitrogen-filled glovebox, to an 8 mL vial equipped with a stir bar were added sequentially stoichiometric amounts of CuCl (0.1 mmol, 1 equiv.), BINAP (0.01 mmol, 0.1 equiv.), NaOAc (0.2 mmol, 2 equiv.), and  $(\text{DMPU})_2\text{Zn}(\text{C}_4\text{F}_9)_2$  (0.08 mmol, 0.8 equiv.). Then, DMSO/DCE was added, and the mixture was stirred at room temperature for 10 minutes. Subsequently, **20S** (45.7 mg, 0.1 mmol, 1 equiv.) was added, then put it under a 20W LEDs, and stirring was continued for 5 h. The light was switched on for 1 h and then off for 1 h, which was repeated until 5 h. The reaction mixture was monitored after each period by  $^{19}\text{F}$  NMR yield with  $\text{PhCF}_3$  as the internal standard substance.

### Light-on/off experiments

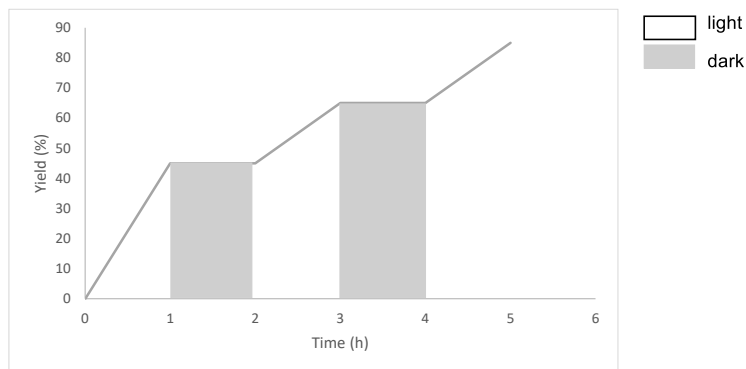

### 6.3 Rationalization of the mechanism

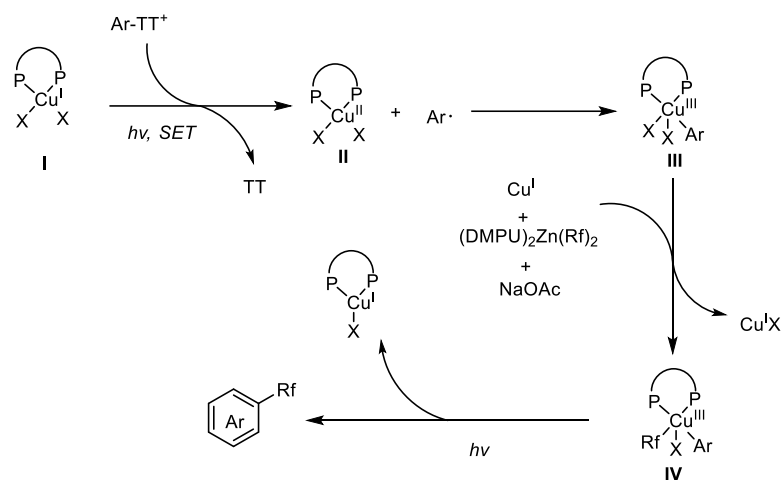

Photoexcitation of the (BINAP)Cu(I) complex<sup>10</sup> (with NaOAc assistance) enables single-electron transfer to the aryl thianthrenium salt, producing an aryl radical (Ar•) and Cu(II) (II). The aryl radical is quickly trapped at copper to give Cu(III)-Ar (III). Simultaneously, transmetalation from the perfluoroalkyl zinc reagent forms Cu-Rf (IV), which then transfers Rf to intermediate II, yielding Cu(III)(Ar)(Rf) (IV). Photo-promoted reductive elimination from IV furnishes the Ar-Rf product and regenerates Cu(I), completing the cycle.

### 7. Characterization of Products

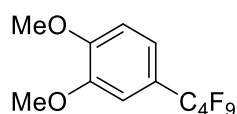

**3**

**1,2-dimethoxy-4-(perfluorobutyl)benzene (3)**, Colorless liquid, 31.7 mg, 89% yield,

$R_f=0.3$  (petroleum ether: ethyl acetate, 10:1, v/v).

$^1\text{H NMR}$  (400 MHz,  $\text{CDCl}_3$ )  $\delta$  7.17 (d,  $J = 8.4$  Hz, 1H), 7.02 (s, 1H), 6.95 (d,  $J = 8.5$  Hz, 1H), 3.92 (d,  $J = 5.9$  Hz, 6H).

$^{13}\text{C NMR}$  (101 MHz,  $\text{CDCl}_3$ )  $\delta$  152.0, 149.1, 121.0 (t,  $J = 24.8$  Hz), 120.3 (t,  $J = 7.1$  Hz), 110.8, 109.5 (t,  $J = 6.6$  Hz), 56.1 (d,  $J = 6.3$  Hz),  $^{13}\text{C NMR}$  for  $\text{C}_4\text{F}_9$  could not be assigned.

$^{19}\text{F NMR}$  (376 MHz,  $\text{CDCl}_3$ )  $\delta$  -81.07 (t,  $J = 10.0$  Hz, 3F), -109.92 (t,  $J = 13.3$  Hz, 2F), -122.79 (q,  $J = 10.0$  Hz, 2F), -125.58 – -126.11 (m, 2F).

**HRMS (EI)** calcd for  $\text{C}_{12}\text{H}_9\text{F}_9\text{O}_2$  ( $\text{M}^+$ ): 356.0459, found: 356.0450.

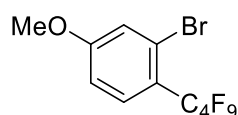

4

**2-bromo-4-methoxy-1-(perfluorobutyl)benzene (4)**, Colorless liquid, 31.5 mg, 78% yield,  $R_f=0.3$  (petroleum ether: ethyl acetate, 10:1, v/v).

$^1\text{H NMR}$  (400 MHz,  $\text{CDCl}_3$ )  $\delta$  7.50 (d,  $J = 8.9$  Hz, 1H), 7.24 (d,  $J = 2.6$  Hz, 1H), 6.94 (dd,  $J = 8.9, 2.6$  Hz, 1H), 3.86 (s, 3H).

$^{13}\text{C NMR}$  (101 MHz,  $\text{CDCl}_3$ )  $\delta$  162.3, 131.4 (t,  $J = 8.8$  Hz), 121.8 (t,  $J = 3.2$  Hz), 121.0, 120.0 (t,  $J = 24.9$  Hz), 113.1, 55.8,  $^{13}\text{C NMR}$  for  $\text{C}_4\text{F}_9$  could not be assigned.

$^{19}\text{F NMR}$  (376 MHz,  $\text{CDCl}_3$ )  $\delta$  -80.90 (t,  $J = 9.4$  Hz, 3F), -105.84 (t,  $J = 14.5$  Hz, 2F), -120.72 (q,  $J = 7.6, 5.6$  Hz, 2F), -125.78 – -125.89 (m, 2F).

**HRMS (EI)** calcd for  $\text{C}_{11}\text{H}_6\text{BrF}_9\text{O}$  ( $\text{M}^+$ ): 403.9458, found: 403.9455.

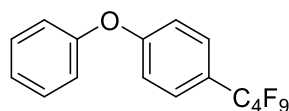

5

**1-(perfluorobutyl)-4-phenoxybenzene (5)**, Colorless liquid, 33.0 mg, 85% yield,  $R_f=0.2$  (petroleum ether).

$^1\text{H NMR}$  (400 MHz,  $\text{CDCl}_3$ )  $\delta$  7.55 (d,  $J = 8.6$  Hz, 2H), 7.42 (dd,  $J = 8.5, 7.4$  Hz, 2H), 7.23 (s, 1H), 7.09 (dd,  $J = 8.4, 6.7$  Hz, 4H).

$^{13}\text{C NMR}$  (101 MHz,  $\text{CDCl}_3$ )  $\delta$  161.2 (d,  $J = 2.1$  Hz), 155.7, 130.3, 128.9 (t,  $J = 6.5$

Hz), 124.8, 120.3, 117.8,  $^{13}\text{C}$  NMR for  $\text{C}_4\text{F}_9$  could not be assigned.

$^{19}\text{F}$  NMR (376 MHz,  $\text{CDCl}_3$ )  $\delta$  -81.13 (t,  $J = 10.0$  Hz, 3F), -110.22 (t,  $J = 13.6$  Hz, 2F), -122.84 (q,  $J = 9.9$  Hz, 2F), -125.07 – -126.38 (m, 2F).

HRMS (EI) calcd for  $\text{C}_{16}\text{H}_9\text{F}_9\text{O}$  ( $\text{M}$ ) $^+$ : 388.0510, found: 388.0502.

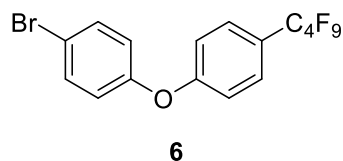

**1-bromo-4-(4-(perfluorobutyl)phenoxy)benzene (6)**, Colorless liquid, 38.2 mg, 82% yield,  $R_f = 0.3$  (petroleum ether).

$^1\text{H}$  NMR (400 MHz,  $\text{CDCl}_3$ )  $\delta$  7.54 (d,  $J = 8.8$  Hz, 2H), 7.51 (d,  $J = 8.9$  Hz, 2H), 7.06 (d,  $J = 8.9$  Hz, 2H), 6.97 (d,  $J = 2.2$  Hz, 1H), 6.95 (d,  $J = 2.1$  Hz, 1H).

$^{13}\text{C}$  NMR (101 MHz,  $\text{CDCl}_3$ )  $\delta$  160.5, 154.9, 133.3, 129.0 (t,  $J = 6.5$  Hz), 123.5 (t,  $J = 24.7$  Hz), 121.9, 118.0, 117.5,  $^{13}\text{C}$  NMR for  $\text{C}_4\text{F}_9$  could not be assigned.

$^{19}\text{F}$  NMR (376 MHz,  $\text{CDCl}_3$ )  $\delta$  -81.04 (t,  $J = 9.4$  Hz, 3F), -110.26 (t,  $J = 14.0$  Hz, 2F), -122.78 (q,  $J = 10.1$  Hz, 2F), -125.45 – -125.75 (m, 2F).

HRMS (EI) calcd for  $\text{C}_{16}\text{H}_8\text{BrF}_9\text{O}$  ( $\text{M}$ ) $^+$ : 465.9615, found: 465.9609.

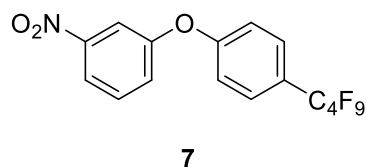

**1-nitro-3-(4-(perfluorobutyl)phenoxy)benzene (7)**, Yellow liquid, 36.4 mg, 84% yield,  $R_f = 0.2$  (petroleum ether).

$^1\text{H}$  NMR (400 MHz,  $\text{CDCl}_3$ )  $\delta$  8.34 – 8.16 (m, 2H), 7.65 (d,  $J = 8.8$  Hz, 2H), 7.24 – 7.16 (m, 2H), 7.15 – 7.06 (m, 2H).

$^{13}\text{C}$  NMR (101 MHz,  $\text{CDCl}_3$ )  $\delta$  161.7, 158.3, 143.6, 129.3 (t,  $J = 6.5$  Hz), 126.1, 125.3 (t,  $J = 24.7$  Hz), 119.9, 118.4,  $^{13}\text{C}$  NMR for  $\text{C}_4\text{F}_9$  could not be assigned.

$^{19}\text{F}$  NMR (376 MHz,  $\text{CDCl}_3$ )  $\delta$  -81.02 (t,  $J = 9.7$  Hz, 3F), -110.43 (t,  $J = 13.7$  Hz, 2F), -122.69 (q,  $J = 10.3$  Hz, 2F), -125.43 – -125.76 (m, 2F).

HRMS (EI) calcd for  $\text{C}_{16}\text{H}_8\text{F}_9\text{NO}_3$  ( $\text{M}$ ) $^+$ : 433.0360, found: 433.0352.

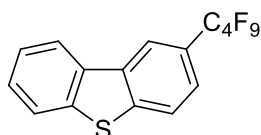

8

**2-(perfluorobutyl)dibenzo[b,d]thiophene (8)**, Yellow liquid, 36.6 mg, 91% yield,  $R_f$  = 0.3 (petroleum ether).

$^1\text{H NMR}$  (400 MHz,  $\text{CDCl}_3$ )  $\delta$  8.36 (s, 1H), 8.27 – 8.16 (m, 1H), 7.98 (d,  $J = 8.4$  Hz, 1H), 7.94 – 7.84 (m, 1H), 7.65 (d,  $J = 8.4$  Hz, 1H), 7.59 – 7.50 (m, 2H).

$^{13}\text{C NMR}$  (101 MHz,  $\text{CDCl}_3$ )  $\delta$  143.5, 139.9, 135.7, 134.8, 127.8, 125.2, 125.1, 124.5 (t,  $J = 6.5$  Hz), 123.2, 123.1, 122.1, 120.4 (t,  $J = 7.0$  Hz),  $^{13}\text{C NMR}$  for  $\text{C}_4\text{F}_9$  could not be assigned.

$^{19}\text{F NMR}$  (376 MHz,  $\text{CDCl}_3$ )  $\delta$  -80.95 (t,  $J = 9.6$  Hz, 3F), -109.77 (t,  $J = 13.4$  Hz, 2F), -122.42 (q,  $J = 10.3, 9.8$  Hz, 2F), -125.43 – -125.54 (m, 2F).

**HRMS (EI)** calcd for  $\text{C}_{16}\text{H}_7\text{F}_9\text{S}$  ( $\text{M}$ ) $^+$ : 402.0125, found: 402.0118.

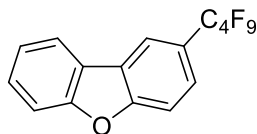

9

**2-(perfluorobutyl)dibenzo[b,d]furan (9)**, Yellow liquid, 34.7 mg, 90% yield,  $R_f$  = 0.3 (petroleum ether).

$^1\text{H NMR}$  (400 MHz,  $\text{CDCl}_3$ )  $\delta$  8.19 (s, 1H), 7.99 (dd,  $J = 7.8, 1.3$  Hz, 1H), 7.67 (s, 2H), 7.61 (d,  $J = 8.3$  Hz, 1H), 7.56 – 7.49 (m, 1H), 7.44 – 7.36 (m, 1H).

$^{13}\text{C NMR}$  (101 MHz,  $\text{CDCl}_3$ )  $\delta$  158.0, 157.0, 128.4, 125.8 (t,  $J = 6.6$  Hz), 124.9, 123.6, 123.5 (t,  $J = 4.0$  Hz), 123.4, 121.1, 120.1 (t,  $J = 7.0$  Hz), 112.1,  $^{13}\text{C NMR}$  for  $\text{C}_4\text{F}_9$  could not be assigned.

$^{19}\text{F NMR}$  (376 MHz,  $\text{CDCl}_3$ )  $\delta$  -81.01 (t,  $J = 9.4$  Hz, 3F), -109.12 (t,  $J = 13.4$  Hz, 2F), -122.44 (q,  $J = 10.2$  Hz, 2F), -125.40 – -125.81 (m, 2F).

**HRMS (EI)** calcd for  $\text{C}_{16}\text{H}_7\text{F}_9\text{O}$  ( $\text{M}$ ) $^+$ : 386.0353, found: 386.0344.

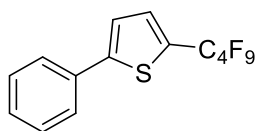

10

**2-(perfluorobutyl)-5-phenylthiophene (10)**, Colorless liquid, 33.6 mg, 89% yield,  $R_f = 0.3$  (petroleum ether).

$^1\text{H NMR}$  (400 MHz,  $\text{CDCl}_3$ )  $\delta$  7.61 (d,  $J = 7.9$  Hz, 2H), 7.45 – 7.36 (m, 4H), 7.30 (d,  $J = 4.1$  Hz, 1H).

$^{13}\text{C NMR}$  (101 MHz,  $\text{CDCl}_3$ )  $\delta$  149.9, 133.0, 131.3 (t,  $J = 6.2$  Hz), 129.3, 129.0, 128.0, 126.4, 123.2,  $^{13}\text{C NMR}$  for  $\text{C}_4\text{F}_9$  could not be assigned.

$^{19}\text{F NMR}$  (376 MHz,  $\text{CDCl}_3$ )  $\delta$  -80.99 (t,  $J = 9.7$  Hz, 3F), -101.53 (t,  $J = 13.4$  Hz, 2F), -122.46 (q,  $J = 9.4$  Hz, 2F), -125.51 – -125.65 (m, 2F).

**HRMS (EI)** calcd for  $\text{C}_{14}\text{H}_7\text{F}_9\text{S}$  ( $\text{M}^+$ ): 378.0125, found: 378.0121.

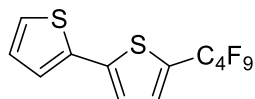

11

**5-(perfluorobutyl)-2,2'-bithiophene (11)**, Colorless liquid, 28.3 mg, 74% yield,  $R_f = 0.3$  (petroleum ether).

$^1\text{H NMR}$  (400 MHz,  $\text{CDCl}_3$ )  $\delta$  7.33 (dd,  $J = 9.1, 4.4$  Hz, 2H), 7.25 (s, 1H), 7.16 (d,  $J = 3.9$  Hz, 1H), 7.06 (dd,  $J = 5.1, 3.6$  Hz, 1H).

$^{13}\text{C NMR}$  (101 MHz,  $\text{CDCl}_3$ )  $\delta$  142.8, 135.6, 131.2 (d,  $J = 6.1$  Hz), 128.3, 127.3 (t,  $J = 29.3$  Hz), 126.3, 125.5, 123.6,  $^{13}\text{C NMR}$  for  $\text{C}_4\text{F}_9$  could not be assigned.

$^{19}\text{F NMR}$  (376 MHz,  $\text{CDCl}_3$ )  $\delta$  -80.97 (t,  $J = 9.7$  Hz, 3F), -101.55 (t,  $J = 13.3$  Hz, 2F), -122.46 (q,  $J = 9.5, 9.1$  Hz, 2F), -125.48 – -125.66 (m, 2F).

**HRMS (EI)** calcd for  $\text{C}_{12}\text{H}_5\text{F}_9\text{S}_2$  ( $\text{M}^+$ ): 383.9689, found: 383.9682.

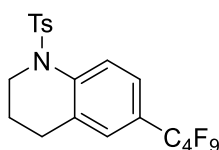

12

**6-(perfluorobutyl)-1-tosyl-1,2,3,4-tetrahydroquinoline (12)**, Colorless liquid, 42.9

mg, 85% yield,  $R_f=0.3$  (petroleum ether: ethyl acetate, 5:1, v/v).

$^1\text{H NMR}$  (400 MHz,  $\text{CDCl}_3$ )  $\delta$  7.96 (d,  $J = 8.8$  Hz, 1H), 7.54 (d,  $J = 8.3$  Hz, 2H), 7.40 (d,  $J = 8.9$  Hz, 1H), 7.25 (d,  $J = 8.1$  Hz, 3H), 3.93 – 3.81 (m, 2H), 2.60 (t,  $J = 6.6$  Hz, 2H), 2.42 (s, 3H), 1.73 (dt,  $J = 12.5, 6.5$  Hz, 2H).

$^{13}\text{C NMR}$  (101 MHz,  $\text{CDCl}_3$ )  $\delta$  144.1, 140.4, 136.4, 130.2, 129.8, 127.8 (t,  $J = 6.5$  Hz), 127.0, 125.0 (t,  $J = 6.4$  Hz), 124.4 (t,  $J = 24.6$  Hz), 124.0, 46.6, 27.0, 21.6, 21.3,  $^{13}\text{C NMR}$  for  $\text{C}_4\text{F}_9$  could not be assigned.

$^{19}\text{F NMR}$  (376 MHz,  $\text{CDCl}_3$ )  $\delta$  -81.03 (t,  $J = 9.8$  Hz, 3F), -110.70 (t,  $J = 13.8$  Hz, 2F), -122.80 (q,  $J = 9.9$  Hz, 2F), -125.56 – -125.66 (m, 2F).

**HRMS (EI)** calcd for  $\text{C}_{20}\text{H}_{16}\text{F}_9\text{NO}_2\text{S}$  ( $\text{M}^+$ ): 505.0758, found: 505.0750.

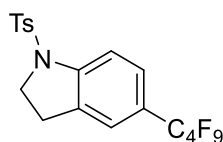

13

**5-(perfluorobutyl)-1-tosylindoline (13)**, Colorless liquid, 42.2 mg, 86% yield,  $R_f=0.3$  (petroleum ether: ethyl acetate, 5:1, v/v).

$^1\text{H NMR}$  (400 MHz,  $\text{CDCl}_3$ )  $\delta$  7.71 (d,  $J = 8.3$  Hz, 3H), 7.40 (d,  $J = 8.5$  Hz, 1H), 7.27 (d,  $J = 7.9$  Hz, 3H), 3.97 (t,  $J = 8.6$  Hz, 2H), 3.01 (t,  $J = 8.6$  Hz, 2H), 2.38 (s, 3H).

$^{13}\text{C NMR}$  (101 MHz,  $\text{CDCl}_3$ )  $\delta$  145.4, 144.7, 133.8, 132.1, 129.9, 127.3, 127.1 (t,  $J = 6.8$  Hz), 123.8 (t,  $J = 7.1$  Hz), 123.6 (d,  $J = 14.5$  Hz), 113.9, 50.1, 27.4, 21.5,  $^{13}\text{C NMR}$  for  $\text{C}_4\text{F}_9$  could not be assigned.

$^{19}\text{F NMR}$  (376 MHz,  $\text{CDCl}_3$ )  $\delta$  -81.07 (t,  $J = 9.8$  Hz, 3F), -110.03 (t,  $J = 13.7$  Hz, 2F), -122.75 (q,  $J = 10.1$  Hz, 2F), -125.52 – -125.91 (m, 2F).

**HRMS (EI)** calcd for  $\text{C}_{19}\text{H}_{14}\text{F}_9\text{NO}_2\text{S}$  ( $\text{M}^+$ ): 491.0602, found: 491.0595.

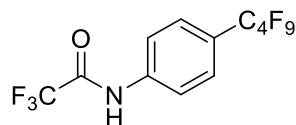

14

**2,2,2-trifluoro-N-(4-(perfluorobutyl)phenyl)acetamide (14)**, Colorless liquid, 32.5 mg, 71% yield,  $R_f=0.3$  (petroleum ether: ethyl acetate, 5:1, v/v).

**<sup>1</sup>H NMR (400 MHz, CDCl<sub>3</sub>)** δ 8.07 (s, 1H), 7.76 (d, *J* = 8.6 Hz, 2H), 7.64 (d, *J* = 8.7 Hz, 2H).

**<sup>13</sup>C NMR (101 MHz, CDCl<sub>3</sub>)** δ 155.1 (q, *J* = 38.4 Hz), 138.6, 128.4 (t, *J* = 6.8 Hz), 126.6 (t, *J* = 25.0 Hz), 120.3, 114.2 (q, *J* = 289.9 Hz), <sup>13</sup>C NMR for C<sub>4</sub>F<sub>9</sub> could not be assigned.

**<sup>19</sup>F NMR (377 MHz, CDCl<sub>3</sub>)** δ -75.68 (m, 3F), -81.01 (t, *J* = 9.9 Hz, 3F), -110.90 (t, *J* = 13.4 Hz, 2F), -122.76 (q, *J* = 9.6 Hz, 2F), -125.43 – -125.71 (m, 2F).

**HRMS (EI)** calcd for C<sub>12</sub>H<sub>5</sub>F<sub>12</sub>NO (M)<sup>+</sup>: 407.0180, found: 407.0187.

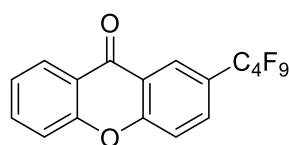

**15**

**2-(perfluorobutyl)-9H-xanthen-9-one (15)**, Colorless liquid, 33.1 mg, 80% yield, *R<sub>f</sub>* = 0.3 (petroleum ether: ethyl acetate, 30:1, v/v).

**<sup>1</sup>H NMR (400 MHz, CDCl<sub>3</sub>)** δ 8.62 (d, *J* = 2.3 Hz, 1H), 8.37 (dd, *J* = 8.0, 1.7 Hz, 1H), 7.91 (dd, *J* = 8.9, 2.4 Hz, 1H), 7.79 (td, *J* = 7.9, 7.2, 1.7 Hz, 1H), 7.65 (d, *J* = 8.8 Hz, 1H), 7.55 (d, *J* = 8.5 Hz, 1H), 7.49 – 7.41 (m, 1H).

**<sup>13</sup>C NMR (101 MHz, CDCl<sub>3</sub>)** δ 176.4, 158.1, 156.2, 135.7, 132.6 (t, *J* = 6.2 Hz), 127.1, 126.9 (d, *J* = 8.1 Hz), 124.9, 121.9 (d, *J* = 3.6 Hz), 119.2, 118.3, <sup>13</sup>C NMR for C<sub>4</sub>F<sub>9</sub> could not be assigned.

**<sup>19</sup>F NMR (376 MHz, CDCl<sub>3</sub>)** δ -80.95 (t, *J* = 10.0 Hz, 3F), -110.29 (t, *J* = 13.7 Hz, 2F), -122.44 (q, *J* = 10.3, 9.8 Hz, 2F), -125.27 – -125.79 (m, 2F).

**HRMS (EI)** calcd for C<sub>17</sub>H<sub>7</sub>F<sub>9</sub>O<sub>2</sub> (M)<sup>+</sup>: 414.0302, found: 414.0295.

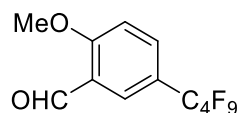

**16**

**2-methoxy-5-(perfluorobutyl)benzaldehyde (16)**, Colorless liquid, 24.8 mg, 70% yield, *R<sub>f</sub>* = 0.3 (petroleum ether: ethyl acetate, 5:1, v/v).

**<sup>1</sup>H NMR (400 MHz, CDCl<sub>3</sub>)** δ 10.47 (s, 1H), 8.06 (d, *J* = 2.4 Hz, 1H), 7.75 (dd, *J* =

8.8, 2.5 Hz, 1H), 7.12 (d,  $J = 8.8$  Hz, 1H), 4.01 (s, 3H).

$^{13}\text{C}$  NMR (101 MHz,  $\text{CDCl}_3$ )  $\delta$  188.6, 164.1, 134.1 (t,  $J = 6.2$  Hz), 127.8 (t,  $J = 6.5$  Hz), 124.8, 121.5 (t,  $J = 25.5$  Hz), 112.3, 56.2,  $^{13}\text{C}$  NMR for  $\text{C}_4\text{F}_9$  could not be assigned.

$^{19}\text{F}$  NMR (376 MHz,  $\text{CDCl}_3$ )  $\delta$  -81.09 (t,  $J = 10.0$  Hz, 3F), -110.47 (t,  $J = 13.4$  Hz, 2F), -122.74 (q,  $J = 10.2, 9.8$  Hz, 2F), -125.54 – -125.69 (m, 2F).

HRMS (EI) calcd for  $\text{C}_{12}\text{H}_7\text{F}_9\text{O}_2$  ( $\text{M}^+$ ): 354.0302, found: 354.0295.

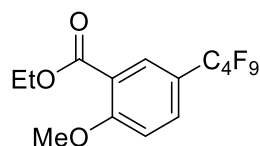

17

**Ethyl 2-methoxy-5-(perfluorobutyl)benzoate (17)**, Colorless liquid, 29.1 mg, 73% yield,  $R_f = 0.3$  (petroleum ether: ethyl acetate, 5:1, v/v).

$^1\text{H}$  NMR (400 MHz,  $\text{CDCl}_3$ )  $\delta$  7.99 (d,  $J = 2.4$  Hz, 1H), 7.66 (d,  $J = 8.9$  Hz, 1H), 7.07 (d,  $J = 8.8$  Hz, 1H), 4.38 (q,  $J = 7.2$  Hz, 2H), 3.96 (s, 3H), 1.39 (t,  $J = 7.1$  Hz, 3H).

$^{13}\text{C}$  NMR (101 MHz,  $\text{CDCl}_3$ )  $\delta$  165.1, 161.8, 131.9 (t,  $J = 6.3$  Hz), 130.5 (t,  $J = 6.6$  Hz), 121.0, 120.5 (t,  $J = 25.3$  Hz), 112.2, 61.5, 56.4, 14.3,  $^{13}\text{C}$  NMR for  $\text{C}_4\text{F}_9$  could not be assigned.

$^{19}\text{F}$  NMR (376 MHz,  $\text{CDCl}_3$ )  $\delta$  -81.08 (t,  $J = 10.0$  Hz, 3F), -110.34 (t,  $J = 13.9$  Hz, 2F), -122.72 (q,  $J = 10.0$  Hz, 2F), -125.39 – -125.97 (m, 2F).

HRMS (EI) calcd for  $\text{C}_{14}\text{H}_{11}\text{F}_9\text{O}_3$  ( $\text{M}^+$ ): 398.0564, found: 398.0554.

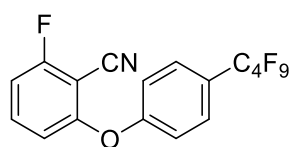

18

**2-fluoro-6-(4-(perfluorobutyl)phenoxy)benzonitrile (18)**, Colorless liquid, 34.9 mg, 81% yield,  $R_f = 0.3$  (petroleum ether: ethyl acetate, 30:1, v/v).

$^1\text{H}$  NMR (400 MHz,  $\text{CDCl}_3$ )  $\delta$  7.65 (d,  $J = 8.5$  Hz, 2H), 7.56 – 7.48 (m, 1H), 7.22 (d,  $J = 8.6$  Hz, 2H), 7.00 (t,  $J = 8.4$  Hz, 1H), 6.73 (d,  $J = 8.5$  Hz, 1H).

$^{13}\text{C}$  NMR (101 MHz,  $\text{CDCl}_3$ )  $\delta$  164.3 (d,  $J = 260.8$  Hz), 159.5 (d,  $J = 4.2$  Hz), 158.0, 135.3 (d,  $J = 10.2$  Hz), 129.4 (t,  $J = 6.5$  Hz), 125.8 (t,  $J = 24.8$  Hz), 119.9, 113.4 (d,  $J =$

3.6 Hz), 111.2 (d,  $J = 19.6$  Hz), 110.8, 95.0 (d,  $J = 18.1$  Hz),  $^{13}\text{C}$  NMR for  $\text{C}_4\text{F}_9$  could not be assigned.

$^{19}\text{F}$  NMR (376 MHz,  $\text{CDCl}_3$ )  $\delta$  -80.99 (t,  $J = 11.3$  Hz, 3F), -103.28 – -104.13 (m, 1F), -110.48 (t,  $J = 13.4$  Hz, 2F), -122.70 (q,  $J = 9.9$  Hz, 2F), -125.49 – -125.64 (m, 2F).

HRMS (EI) calcd for  $\text{C}_{17}\text{H}_7\text{F}_{10}\text{ON}$  ( $\text{M}^+$ ): 431.0368, found: 431.0365.

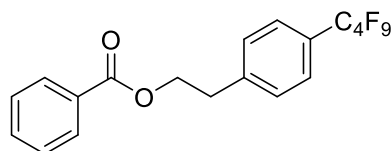

19

**4-(perfluorobutyl)phenethyl benzoate (19)**, Colorless liquid, 28.0 mg, 63% yield,  $R_f = 0.3$  (petroleum ether: ethyl acetate, 30:1, v/v).

$^1\text{H}$  NMR (400 MHz,  $\text{CDCl}_3$ )  $\delta$  8.00 (dd,  $J = 8.4, 1.4$  Hz, 2H), 7.56 (d,  $J = 8.7$  Hz, 3H), 7.47 – 7.40 (m, 4H), 4.57 (t,  $J = 6.8$  Hz, 2H), 3.16 (t,  $J = 6.8$  Hz, 2H).

$^{13}\text{C}$  NMR (101 MHz,  $\text{CDCl}_3$ )  $\delta$  166.6, 142.6, 133.2, 130.2, 129.7, 129.4, 128.6, 127.3 (t,  $J = 7.1$  Hz), 127.2 (t), 64.9, 35.1,  $^{13}\text{C}$  NMR for  $\text{C}_4\text{F}_9$  could not be assigned.

$^{19}\text{F}$  NMR (376 MHz,  $\text{CDCl}_3$ )  $\delta$  -81.06 (t,  $J = 9.5$  Hz, 3F), -110.88 (t,  $J = 13.4$  Hz, 2F), -122.86 (q,  $J = 9.8$  Hz, 2F), -125.50 – -125.90 (m, 2F).

HRMS (EI) calcd for  $\text{C}_{19}\text{H}_{13}\text{F}_9\text{O}_2$  ( $\text{M}^+$ ): 444.0772, found: 444.0764.

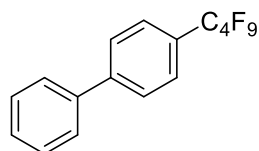

20

**4-(perfluorobutyl)-1,1'-biphenyl (20)**, Colorless liquid, 35.7 mg, 96% yield,  $R_f = 0.3$  (petroleum ether).

$^1\text{H}$  NMR (400 MHz,  $\text{CDCl}_3$ )  $\delta$  7.74 – 7.66 (m, 4H), 7.64 – 7.60 (m, 2H), 7.49 (t,  $J = 7.4$  Hz, 2H), 7.45 – 7.41 (m, 1H).

$^{13}\text{C}$  NMR (101 MHz,  $\text{CDCl}_3$ )  $\delta$  145.1, 139.8, 129.2, 128.4, 127.8 (t,  $J = 24.2$  Hz), 127.46, 127.45, 127.1 (t,  $J = 9.1$  Hz),  $^{13}\text{C}$  NMR for  $\text{C}_4\text{F}_9$  could not be assigned.

$^{19}\text{F}$  NMR (376 MHz,  $\text{CDCl}_3$ )  $\delta$  -81.01 (t,  $J = 9.7$  Hz, 3F), -110.80 (t,  $J = 13.3$  Hz, 2F), -122.68 (q,  $J = 9.9$  Hz, 2F), -125.49 – -125.61 (m, 2F).

**HRMS (EI)** calcd for C<sub>16</sub>H<sub>9</sub>F<sub>9</sub> (M)<sup>+</sup>: 372.0561, found: 372.0552.

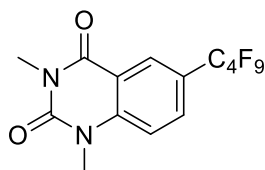

**21**

**1,3-dimethyl-6-(perfluorobutyl)quinazoline-2,4(1H,3H)-dione (21)**, Colorless liquid, 34.7 mg, 85% yield, *R<sub>f</sub>* = 0.3 (petroleum ether: ethyl acetate, 5:1, v/v).

**<sup>1</sup>H NMR (400 MHz, CDCl<sub>3</sub>)** δ 8.47 (s, 1H), 7.85 (d, *J* = 11.1 Hz, 1H), 7.34 (d, *J* = 8.8 Hz, 1H), 3.65 (s, 3H), 3.50 (s, 3H).

**<sup>13</sup>C NMR (101 MHz, CDCl<sub>3</sub>)** δ 161.0, 150.9, 142.9, 132.9 (t, *J* = 6.2 Hz), 128.4 (t, *J* = 6.7 Hz), 123.5 (t, *J* = 25.7 Hz), 115.6, 114.2, 31.1, 28.7, <sup>13</sup>C NMR for C<sub>4</sub>F<sub>9</sub> could not be assigned.

**<sup>19</sup>F NMR (376 MHz, CDCl<sub>3</sub>)** δ -81.01 (t, *J* = 9.8 Hz, 3F), -110.66 (t, *J* = 13.4 Hz, 2F), -122.63 (q, *J* = 10.2 Hz, 2F), -125.37 – -125.75 (m, 2F).

**HRMS (EI)** calcd for C<sub>14</sub>H<sub>9</sub>F<sub>9</sub>N<sub>2</sub>O<sub>2</sub> (M)<sup>+</sup>: 408.0520, found: 408.0518.

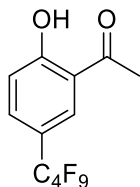

**22**

**1-(2-hydroxy-5-(perfluorobutyl)phenyl)ethan-1-one (22)**, Colorless liquid, 24.1 mg, 68% yield, *R<sub>f</sub>* = 0.3 (petroleum ether: ethyl acetate, 5:1, v/v).

**<sup>1</sup>H NMR (400 MHz, CDCl<sub>3</sub>)** δ 12.57 (s, 1H), 7.94 (s, 1H), 7.66 (d, *J* = 8.8 Hz, 1H), 7.11 (d, *J* = 8.9 Hz, 1H), 2.69 (s, 3H).

**<sup>13</sup>C NMR (101 MHz, CDCl<sub>3</sub>)** δ 204.3, 165.1, 134.3 (t, *J* = 6.0 Hz), 129.9 (t, *J* = 6.8 Hz), 119.5, 119.4, 119.4 (t, *J* = 25.4 Hz), 26.8, <sup>13</sup>C NMR for C<sub>4</sub>F<sub>9</sub> could not be assigned.

**<sup>19</sup>F NMR (376 MHz, CDCl<sub>3</sub>)** δ -81.05 (t, *J* = 9.8 Hz, 3F), -110.31 (t, *J* = 12.2 Hz, 2F), -122.69 (q, *J* = 9.9 Hz, 2F), -125.49 – -125.62 (m, 2F).

**HRMS (EI)** calcd for C<sub>12</sub>H<sub>7</sub>F<sub>9</sub>O<sub>2</sub> (M)<sup>+</sup>: 354.0302, found: 354.0294.

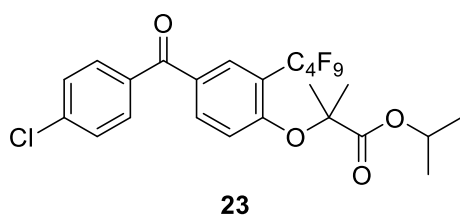

**Isopropyl 2-(4-(4-chlorobenzoyl)-2-(perfluorobutyl)phenoxy)-2-methylpropanoate (23)**, Colorless liquid, 44.5 mg, 77% yield,  $R_f = 0.3$  (petroleum ether: ethyl acetate, 30:1, v/v).

$^1\text{H NMR}$  (400 MHz,  $\text{CDCl}_3$ )  $\delta$  7.99 (s, 1H), 7.89 (d,  $J = 8.8$  Hz, 1H), 7.69 (d,  $J = 8.5$  Hz, 2H), 7.47 (d,  $J = 8.5$  Hz, 2H), 6.81 (d,  $J = 8.8$  Hz, 1H), 5.06 (p,  $J = 6.2$  Hz, 1H), 1.68 (s, 6H), 1.16 (d,  $J = 6.3$  Hz, 6H).

$^{13}\text{C NMR}$  (101 MHz,  $\text{CDCl}_3$ )  $\delta$  193.2, 172.6, 158.5 (t,  $J = 2.4$  Hz), 139.2, 135.3 (d,  $J = 76.9$  Hz), 132.2 (t,  $J = 9.0$  Hz), 131.3, 129.6, 129.0, 118.6 (t,  $J = 22.9$  Hz), 115.8, 80.8, 69.7, 25.1, 21.5,  $^{13}\text{C NMR}$  for  $\text{C}_4\text{F}_9$  could not be assigned.

$^{19}\text{F NMR}$  (376 MHz,  $\text{CDCl}_3$ )  $\delta$  -80.89 (t,  $J = 9.8$  Hz, 3F), -107.84 (t,  $J = 13.4$  Hz, 2F), -121.36 (q,  $J = 9.7$  Hz, 2F), -125.58 – -126.85 (m, 2F).

**HRMS (EI)** calcd for  $\text{C}_{24}\text{H}_{20}\text{ClF}_9\text{O}_4$  ( $\text{M}^+$ ): 578.0906, found: 578.0897.

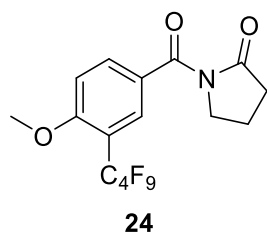

**1-(4-methoxy-3-(perfluorobutyl)benzoyl)pyrrolidin-2-one (24)**, Colorless liquid, 30.2 mg, 69% yield,  $R_f = 0.3$  (petroleum ether: ethyl acetate, 4:1, v/v).

$^1\text{H NMR}$  (400 MHz,  $\text{CDCl}_3$ )  $\delta$  7.83 (d,  $J = 8.3$  Hz, 2H), 7.01 (d,  $J = 8.5$  Hz, 1H), 3.95 (t,  $J = 7.1$  Hz, 2H), 3.92 (s, 3H), 2.62 (t,  $J = 7.9$  Hz, 2H), 2.15 (p,  $J = 7.6$  Hz, 2H).

$^{13}\text{C NMR}$  (101 MHz,  $\text{CDCl}_3$ )  $\delta$  174.7, 168.8, 161.3 (t,  $J = 2.2$  Hz), 135.4, 131.5 (t,  $J = 9.1$  Hz), 126.0, 116.3 (t,  $J = 23.2$  Hz), 111.3, 56.2, 46.8, 33.3, 17.6,  $^{13}\text{C NMR}$  for  $\text{C}_4\text{F}_9$  could not be assigned.

$^{19}\text{F NMR}$  (376 MHz,  $\text{CDCl}_3$ )  $\delta$  -80.92 (t,  $J = 9.9$  Hz, 3F), -108.27 (t,  $J = 14.0$  Hz, 2F), -121.94 (q,  $J = 9.7$  Hz, 2F), -125.74 – -126.63 (m, 2F).

**HRMS (EI)** calcd for  $\text{C}_{16}\text{H}_{12}\text{F}_9\text{NO}_3$  ( $\text{M}^+$ ): 437.0673, found: 437.0667.

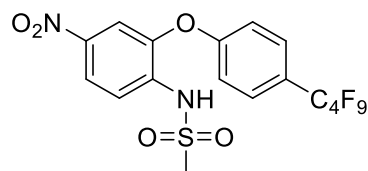

25

**N-(4-nitro-2-(3-(perfluorobutyl)phenoxy)phenyl)methanesulfonamide (25)**, Yellow solid, 42.1 mg, 80% yield,  $R_f = 0.3$  (petroleum ether: ethyl acetate, 2:1, v/v)

$^1\text{H NMR}$  (400 MHz,  $\text{CDCl}_3$ )  $\delta$  7.87 (d,  $J = 2.6$  Hz, 1H), 7.82 (dd,  $J = 8.7, 2.5$  Hz, 1H), 7.58 (d,  $J = 8.7$  Hz, 2H), 7.48 (d,  $J = 8.7$  Hz, 2H), 7.43 (d,  $J = 8.7$  Hz, 1H), 7.32 (s, 1H), 3.31 (s, 3H).

$^{13}\text{C NMR}$  (101 MHz,  $\text{CDCl}_3$ )  $\delta$  154.7, 148.9, 144.0, 132.9, 132.1, 128.7, 124.6, 116.9, 113.9, 108.4, 40.3,  $^{13}\text{C NMR}$  for  $\text{C}_4\text{F}_9$  could not be assigned.

$^{19}\text{F NMR}$  (376 MHz,  $\text{CDCl}_3$ )  $\delta$  -80.98 (t,  $J = 9.8$  Hz, 3F), -110.94 (t,  $J = 13.8$  Hz, 2F), -122.62 (q,  $J = 9.7$  Hz, 2F), -125.53 – -125.65 (m, 2F).

**HRMS (EI)** calcd for  $\text{C}_{17}\text{H}_{11}\text{F}_9\text{N}_2\text{O}_5\text{S}$  ( $\text{M}^+$ ): 526.0245, found: 526.0236.

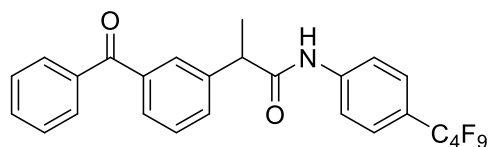

26

**2-(3-(4-(perfluorobutyl)benzoyl)phenyl)-N-phenylpropanamide (26)**, White solid, 49.8 mg, 91% yield,  $R_f = 0.3$  (petroleum ether: ethyl acetate, 5:1, v/v).

$^1\text{H NMR}$  (400 MHz,  $\text{CDCl}_3$ )  $\delta$  8.08 (s, 1H), 7.83 (s, 1H), 7.75 (d,  $J = 7.5$  Hz, 2H), 7.62 (dq,  $J = 15.1, 7.7$  Hz, 5H), 7.48 – 7.41 (m, 5H), 3.82 (q,  $J = 7.0$  Hz, 1H), 1.58 (d,  $J = 6.9$  Hz, 3H).

$^{13}\text{C NMR}$  (101 MHz,  $\text{CDCl}_3$ )  $\delta$  197.2, 172.4, 141.5, 141.4, 138.0, 137.2, 132.9, 131.5, 130.1, 129.7, 129.3, 129.0, 128.5, 127.8 (t,  $J = 6.3$  Hz), 124.0 (t,  $J = 24.7$  Hz), 119.3, 47.9, 18.8,  $^{13}\text{C NMR}$  for  $\text{C}_4\text{F}_9$  could not be assigned.

$^{19}\text{F NMR}$  (376 MHz,  $\text{CDCl}_3$ )  $\delta$  -81.11 (t,  $J = 9.9$  Hz, 3F), -110.61 (t,  $J = 13.8$  Hz, 2F), -122.86 (q,  $J = 9.7$  Hz, 2F), -125.37 – -125.88 (m, 2F).

**HRMS (EI)** calcd for  $\text{C}_{26}\text{H}_{18}\text{F}_9\text{NO}_2$  ( $\text{M}^+$ ): 547.1194, found: 547.1187.

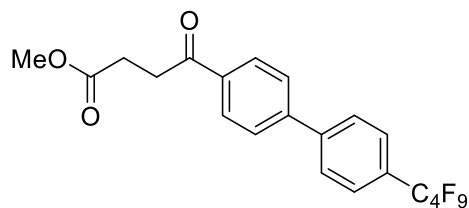

27

**Methyl 4-oxo-4-(4'-(perfluorobutyl)-[1,1'-biphenyl]-4-yl)butanoate (27)**, Colorless liquid, 35.0 mg, 72% yield,  $R_f=0.3$  (petroleum ether: ethyl acetate, 5:1, v/v).

$^1\text{H NMR}$  (400 MHz,  $\text{CDCl}_3$ )  $\delta$  8.13 – 8.03 (m, 2H), 7.72 (dt,  $J = 14.8, 8.3$  Hz, 6H), 3.72 (s, 3H), 3.37 (t,  $J = 6.6$  Hz, 2H), 2.81 (t,  $J = 6.6$  Hz, 2H).

$^{13}\text{C NMR}$  (101 MHz,  $\text{CDCl}_3$ )  $\delta$  197.7, 173.5, 144.3, 143.7, 136.2, 128.9, 128.7 (t,  $J = 24.4$  Hz), 127.67, 127.66 (t,  $J = 7.1$  Hz), 127.65, 52.0, 33.6, 28.1,  $^{13}\text{C NMR}$  for  $\text{C}_4\text{F}_9$  could not be assigned.

$^{19}\text{F NMR}$  (376 MHz,  $\text{CDCl}_3$ )  $\delta$  -80.98 (t,  $J = 9.6$  Hz, 3F), -110.98 (t,  $J = 13.8$  Hz, 2F), -122.68 (q,  $J = 9.8$  Hz, 2F), -125.43 – -125.70 (m, 2F).

**HRMS (EI)** calcd for  $\text{C}_{21}\text{H}_{15}\text{F}_9\text{O}_3$  ( $\text{M}^+$ ): 486.0877, found: 486.0874.

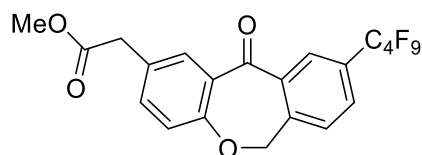

28

**Methyl 2-(11-oxo-9-(perfluorobutyl)-6,11-dihydrodibenzo[b,e]oxepin-2-yl)acetate (28)**, White solid, 41.0 mg, 82% yield,  $R_f=0.3$  (petroleum ether: ethyl acetate, 5:1, v/v).

$^1\text{H NMR}$  (400 MHz,  $\text{CDCl}_3$ )  $\delta$  8.39 (d,  $J = 2.4$  Hz, 1H), 7.99 (d,  $J = 6.4$  Hz, 1H), 7.69 (d,  $J = 2.5$  Hz, 1H), 7.59 (t,  $J = 7.4$  Hz, 1H), 7.53 – 7.46 (m, 1H), 7.38 (dd,  $J = 7.4, 1.2$  Hz, 1H), 5.24 (s, 2H), 3.73 (s, 3H), 3.71 (s, 2H).

$^{13}\text{C NMR}$  (101 MHz,  $\text{CDCl}_3$ )  $\delta$  189.3, 171.3, 159.5, 139.3, 137.7, 136.1, 136.04, 136.02 (t,  $J = 9.1$  Hz), 133.5, 130.4, 129.6, 128.1, 127.9 (d,  $J = 3.5$  Hz), 120.7 (t,  $J = 22.8$  Hz), 74.8, 52.5, 40.0,  $^{13}\text{C NMR}$  for  $\text{C}_4\text{F}_9$  could not be assigned.

$^{19}\text{F NMR}$  (376 MHz,  $\text{CDCl}_3$ )  $\delta$  -80.84 (t,  $J = 10.1$  Hz, 3F), -106.75 (t,  $J = 14.3$  Hz, 2F), -121.54 (q,  $J = 9.9$  Hz, 2F), -125.87 – -125.97 (m, 2F).

**HRMS (EI)** calcd for  $\text{C}_{21}\text{H}_{13}\text{F}_9\text{O}_4$  ( $\text{M}^+$ ): 500.0670, found: 500.0662.

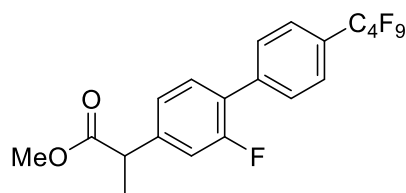

29

**Methyl 2-(2-fluoro-4'-(perfluorobutyl)-[1,1'-biphenyl]-4-yl)propanoate (29)**, Colorless liquid, 40.9 mg, 86% yield,  $R_f = 0.3$  (petroleum ether: ethyl acetate, 30:1, v/v).

$^1\text{H NMR}$  (400 MHz,  $\text{CDCl}_3$ )  $\delta$  7.66 (s, 4H), 7.41 (t,  $J = 8.0$  Hz, 1H), 7.22 – 7.12 (m, 2H), 3.78 (q,  $J = 7.2$  Hz, 1H), 3.71 (s, 3H), 1.55 (d,  $J = 7.2$  Hz, 3H).

$^{13}\text{C NMR}$  (101 MHz,  $\text{CDCl}_3$ )  $\delta$  174.3, 159.7 (d,  $J = 249.8$  Hz), 143.0 (d,  $J = 7.6$  Hz), 139.3, 130.8 (d,  $J = 3.6$  Hz), 129.2 (d,  $J = 3.0$  Hz), 128.0 (t,  $J = 24.5$  Hz), 127.0 (t,  $J = 6.5$  Hz), 126.3 (d,  $J = 13.1$  Hz), 123.9 (d,  $J = 3.1$  Hz), 115.5 (d,  $J = 23.3$  Hz), 52.3, 45.0, 18.4,  $^{13}\text{C NMR}$  for  $\text{C}_4\text{F}_9$  could not be assigned.

$^{19}\text{F NMR}$  (376 MHz,  $\text{CDCl}_3$ )  $\delta$  -81.02 (t,  $J = 10.2$  Hz, 3F), -110.92 (t,  $J = 13.5$  Hz, 2F), -117.16 – -117.32 (m, 1F), -122.63 (q,  $J = 10.2$  Hz, 2F), -125.47 – -125.65 (m, 2F).

**HRMS (EI)** calcd for  $\text{C}_{20}\text{H}_{14}\text{F}_{10}\text{O}_2$  (M) $^+$ : 476.0834, found: 476.0827.

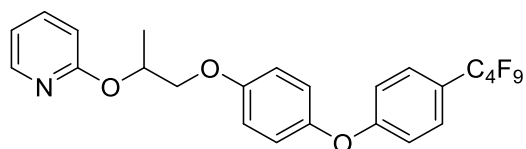

30

**2-((1-(4-(4-(perfluorobutyl)phenoxy)phenoxy)propan-2-yl)oxy)pyridine (30)**, Colorless liquid, 38.8 mg, 72% yield,  $R_f = 0.3$  (petroleum ether: ethyl acetate, 5:1, v/v).

$^1\text{H NMR}$  (400 MHz,  $\text{CDCl}_3$ )  $\delta$  8.16 (d,  $J = 5.1$  Hz, 1H), 7.62 – 7.54 (m, 1H), 7.49 (d,  $J = 8.9$  Hz, 2H), 7.11 – 6.91 (m, 6H), 6.91 – 6.81 (m, 1H), 6.76 (d,  $J = 8.4$  Hz, 1H), 5.61 (h,  $J = 6.3$  Hz, 1H), 4.21 (dd,  $J = 9.8, 5.3$  Hz, 1H), 4.10 (dd,  $J = 9.8, 4.8$  Hz, 1H), 1.50 (d,  $J = 6.4$  Hz, 3H).

$^{13}\text{C NMR}$  (101 MHz,  $\text{CDCl}_3$ )  $\delta$  163.2, 161.9, 156.1, 148.6, 146.8, 138.8, 128.6 (t,  $J = 6.5$  Hz), 122.1 (t,  $J = 24.8$  Hz), 121.7, 116.8, 116.7, 116.0, 111.7, 71.0, 69.2, 17.0,  $^{13}\text{C}$

NMR for C<sub>4</sub>F<sub>9</sub> could not be assigned.

**<sup>19</sup>F NMR (376 MHz, CDCl<sub>3</sub>)** δ -81.04 (t, *J* = 9.7 Hz, 3F), -110.09 (t, *J* = 13.7 Hz, 2F), -122.80 (q, *J* = 10.2 Hz, 2F), -125.51 – -125.78 (m, 2F).

**HRMS (EI)** calcd for C<sub>24</sub>H<sub>18</sub>F<sub>9</sub>NO<sub>3</sub> (M)<sup>+</sup>: 539.1143, found: 539.1139.

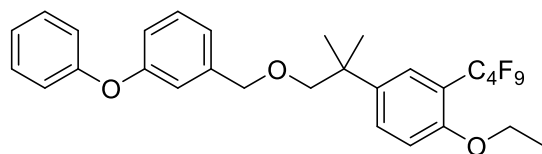

**31**

**1-methoxy-4-(2-methyl-1-((3-phenoxybenzyl)oxy)propan-2-yl)-2-(perfluorobutyl)benzene (31)**, Colorless liquid, 36.8 mg, 62% yield, *R<sub>f</sub>* =0.3 (petroleum ether: ethyl acetate, 50:1, v/v).

**<sup>1</sup>H NMR (400 MHz, CDCl<sub>3</sub>)** δ 7.50 (d, *J* = 8.3 Hz, 2H), 7.42 – 7.33 (m, 2H), 7.29 (t, *J* = 7.7 Hz, 1H), 7.13 (t, *J* = 7.4 Hz, 1H), 7.04 (d, *J* = 7.6 Hz, 2H), 7.00 (d, *J* = 7.8 Hz, 1H), 6.96 – 6.89 (m, 3H), 4.47 (s, 2H), 4.06 (q, *J* = 6.9 Hz, 2H), 3.44 (s, 2H), 1.41 (t, *J* = 7.0 Hz, 3H), 1.35 (s, 6H).

**<sup>13</sup>C NMR (101 MHz, CDCl<sub>3</sub>)** δ 157.5, 157.3, 156.1 (t, *J* = 2.7 Hz), 140.9, 139.4, 131.4, 129.9, 129.7, 126.9 (t, *J* = 8.9 Hz), 123.4, 122.1, 119.1, 117.9, 117.7, 113.0, 80.0, 72.9, 64.6, 38.7, 26.2, 14.6, <sup>13</sup>C NMR for C<sub>4</sub>F<sub>9</sub> could not be assigned.

**<sup>19</sup>F NMR (376 MHz, CDCl<sub>3</sub>)** δ -80.90 (t, *J* = 10.2 Hz, 3F), -107.57 (t, *J* = 13.7 Hz, 2F), -121.81 (q, *J* = 9.6 Hz, 2F), -126.01 – -126.09 (m, 2F).

**HRMS (EI)** calcd for C<sub>29</sub>H<sub>27</sub>F<sub>9</sub>O<sub>3</sub> (M)<sup>+</sup>: 594.1816, found: 594.1811.

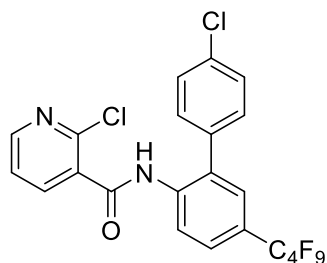

**32**

**2-chloro-N-(4'-chloro-5-(perfluorobutyl)-[1,1'-biphenyl]-2-yl)nicotinamide (32)**, Colorless liquid, 41.4 mg, 74% yield, *R<sub>f</sub>* =0.3 (petroleum ether: ethyl acetate, 2:1, v/v).

**<sup>1</sup>H NMR (400 MHz, CDCl<sub>3</sub>)** δ 8.81 (s, 1H), 8.28 (d, *J* = 8.2 Hz, 1H), 7.78 (d, *J* = 7.8 Hz, 1H), 7.61 – 7.54 (m, 1H), 7.47 (t, *J* = 7.8 Hz, 1H), 7.39 (d, *J* = 8.0 Hz, 2H), 7.30 (d, *J* = 8.2 Hz, 3H), 7.16 (s, 1H).

**<sup>13</sup>C NMR (101 MHz, CDCl<sub>3</sub>)** δ 164.0, 150.5, 143.8, 136.9, 136.3, 134.5, 134.0, 133.4, 132.5, 130.6, 130.5, 129.4, 129.2, 126.4, 125.9, 122.7, <sup>13</sup>C NMR for C<sub>4</sub>F<sub>9</sub> could not be assigned.

**<sup>19</sup>F NMR (376 MHz, CDCl<sub>3</sub>)** δ -80.83 (t, *J* = 10.1 Hz, 3F), -108.51 (t, *J* = 13.4 Hz, 2F), -120.59 (q, *J* = 10.0 Hz, 2F), -125.18 – -125.81 (m, 2F).

**HRMS (EI)** calcd for C<sub>22</sub>H<sub>11</sub>Cl<sub>2</sub>F<sub>9</sub>N<sub>2</sub>O (M)<sup>+</sup>: 560.0105, found: 560.0098.

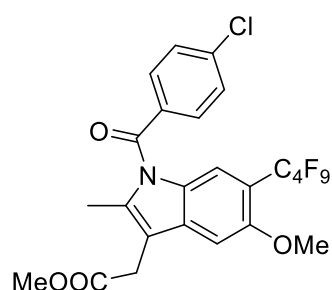

**33**

**Methyl 2-(1-(4-chlorobenzoyl)-5-methoxy-2-methyl-6-(perfluorobutyl)-1H-indol-3-yl)acetate (33)**, White solid, 46.5 mg, 79% yield, *R<sub>f</sub>* = 0.3 (petroleum ether: ethyl acetate, 4:1, v/v).

**<sup>1</sup>H NMR (400 MHz, CDCl<sub>3</sub>)** δ 7.64 (d, *J* = 8.5 Hz, 2H), 7.48 (d, *J* = 8.5 Hz, 2H), 7.14 (s, 1H), 7.05 (s, 1H), 3.90 (s, 3H), 3.72 (s, 3H), 3.69 (s, 2H), 2.40 (s, 3H).

**<sup>13</sup>C NMR (101 MHz, CDCl<sub>3</sub>)** δ 171.1, 168.0, 139.9, 138.7, 133.5, 133.2, 131.2, 129.7, 129.3, 115.2 (t, *J* = 10.3 Hz), 112.1, 101.2, 56.4, 52.3, 30.1, 13.5, <sup>13</sup>C NMR for C<sub>4</sub>F<sub>9</sub> could not be assigned.

**<sup>19</sup>F NMR (376 MHz, CDCl<sub>3</sub>)** δ -80.94 (t, *J* = 10.3 Hz, 3F), -106.73 (t, *J* = 13.8 Hz, 2F), -121.76 (q, *J* = 9.8 Hz, 2F), -125.97 – -126.10 (m, 2F).

**HRMS (EI)** calcd for C<sub>24</sub>H<sub>17</sub>ClF<sub>9</sub>NO<sub>4</sub> (M)<sup>+</sup>: 589.0702, found: 589.0699.

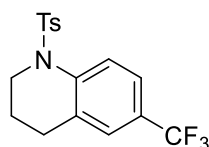

**34**

**1-tosyl-6-(trifluoromethyl)-1,2,3,4-tetrahydroquinoline (34)**, Colorless liquid, 25.9 mg, 73% yield,  $R_f=0.3$  (petroleum ether: ethyl acetate, 5:1, v/v).

$^1\text{H NMR}$  (400 MHz,  $\text{CDCl}_3$ )  $\delta$  7.94 (d,  $J = 8.7$  Hz, 1H), 7.55 (d,  $J = 8.3$  Hz, 2H), 7.42 (d,  $J = 8.8$  Hz, 1H), 7.30 (s, 1H), 7.25 (d,  $J = 8.1$  Hz, 2H), 3.96 – 3.75 (m, 2H), 2.58 (t,  $J = 6.7$  Hz, 2H), 2.41 (s, 3H), 1.75 – 1.68 (m, 2H).

$^{13}\text{C NMR}$  (101 MHz,  $\text{CDCl}_3$ )  $\delta$  144.2, 140.1, 136.4, 130.4, 129.9, 127.1, 126.4 (q,  $J = 3.9$  Hz), 126.3 (q,  $J = 32.7$  Hz), 125.5, 124.2, 123.5 (q,  $J = 3.7$  Hz), 46.6, 27.0, 21.6, 21.3.

$^{19}\text{F NMR}$  (376 MHz,  $\text{CDCl}_3$ )  $\delta$  -62.23(s, 3F).

**HRMS (EI)** calcd for  $\text{C}_{17}\text{H}_{16}\text{F}_3\text{NO}_2\text{S}$  (M) $^+$ : 355.0854, found: 355.0863.

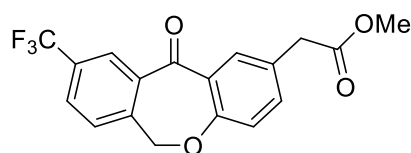

**35**

**Methyl 2-(11-oxo-9-(trifluoromethyl)-6,11-dihydrodibenzo[b,e]oxepin-2-yl)acetate (35)**, Colorless liquid, 20.3 mg, 58% yield,  $R_f = 0.3$  (petroleum ether: ethyl acetate, 5:1, v/v).

$^1\text{H NMR}$  (400 MHz,  $\text{CDCl}_3$ )  $\delta$  8.33 (d,  $J = 2.4$  Hz, 1H), 7.93 (d,  $J = 7.7$  Hz, 1H), 7.75 (d,  $J = 2.4$  Hz, 1H), 7.60 (t,  $J = 7.5$  Hz, 1H), 7.49 (d,  $J = 7.6$  Hz, 1H), 7.40 (d,  $J = 8.0$  Hz, 1H), 5.30 (s, 2H), 3.73 (s, 3H), 3.69 (s, 2H).

$^{13}\text{C NMR}$  (101 MHz,  $\text{CDCl}_3$ )  $\delta$  189.8, 171.4, 158.6, 139.8, 137.0, 135.5, 133.9 (q,  $J = 5.1$  Hz), 133.4, 130.1, 129.7, 128.2, 127.6, 127.2, 124.5, 122.3 (q,  $J = 30.1, 29.6$  Hz), 74.6, 52.5, 40.0.

$^{19}\text{F NMR}$  (376 MHz,  $\text{CDCl}_3$ )  $\delta$  -62.13(d, 3F).

**HRMS (EI)** calcd for  $\text{C}_{18}\text{H}_{13}\text{F}_3\text{O}_4$  (M) $^+$ : 350.0766, found: 350.0759.

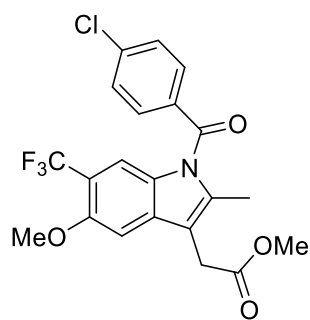

36

**Methyl 2-(1-(4-chlorobenzoyl)-5-methoxy-2-methyl-6-(trifluoromethyl)-1H-indol-3-yl)acetate (36)**, White solid, 23.7 mg, 54% yield,  $R_f$  = 0.3 (petroleum ether: ethyl acetate, 4:1, v/v).

$^1\text{H NMR}$  (400 MHz,  $\text{CDCl}_3$ )  $\delta$  7.65 (d,  $J$  = 8.5 Hz, 2H), 7.50 (d,  $J$  = 8.6 Hz, 2H), 7.34 (s, 1H), 7.04 (s, 1H), 3.95 (s, 3H), 3.71 (s, 3H), 3.69 (s, 2H), 2.35 (s, 3H).

$^{13}\text{C NMR}$  (101 MHz,  $\text{CDCl}_3$ )  $\delta$  171.2, 168.2, 154.1, 140.0, 138.3, 133.4, 133.2, 131.3, 129.5, 129.4, 124.0 (q,  $J$  = 271.7 Hz), 114.9 (d,  $J$  = 30.4 Hz), 113.3 (q,  $J$  = 6.1 Hz), 112.3, 101.0, 56.5, 52.4, 30.2, 13.71.

$^{19}\text{F NMR}$  (376 MHz,  $\text{CDCl}_3$ )  $\delta$  -61.69(s, 3F).

**HRMS (EI)** calcd for  $\text{C}_{21}\text{H}_{17}\text{ClF}_3\text{NO}_4$  ( $\text{M}^+$ ): 439.0798, found: 439.0791.

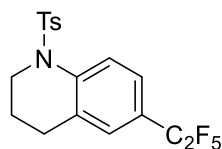

37

**6-(perfluoroethyl)-1-tosyl-1,2,3,4-tetrahydroquinoline (37)**, Colorless liquid, 32.4 mg, 80% yield,  $R_f$  = 0.3 (petroleum ether: ethyl acetate, 5:1, v/v).

$^1\text{H NMR}$  (400 MHz,  $\text{CDCl}_3$ )  $\delta$  7.92 (d,  $J$  = 8.7 Hz, 1H), 7.53 (d,  $J$  = 8.4 Hz, 2H), 7.38 (d,  $J$  = 8.8 Hz, 1H), 7.24 (s, 2H), 7.22 (s, 1H), 3.88 – 3.72 (m, 2H), 2.58 (t,  $J$  = 6.7 Hz, 2H), 2.39 (s, 3H), 1.71 (dt,  $J$  = 12.5, 6.6 Hz, 2H).

$^{13}\text{C NMR}$  (101 MHz,  $\text{CDCl}_3$ )  $\delta$  144.2, 140.5, 136.6, 130.3, 129.9, 127.5 (t,  $J$  = 6.4 Hz), 127.1, 124.7 (t,  $J$  = 6.6 Hz), 124.4, 124.1, 46.7, 27.1, 21.6, 21.5,  $^{13}\text{C NMR}$  for  $\text{C}_2\text{F}_5$  could not be assigned.

$^{19}\text{F NMR}$  (376 MHz,  $\text{CDCl}_3$ )  $\delta$  -84.74(s, 3F), -114.44(s, 2F).

**HRMS (EI)** calcd for  $\text{C}_{18}\text{H}_{16}\text{F}_5\text{NO}_2\text{S}$  ( $\text{M}^+$ ): 405.0822, found: 405.0815.

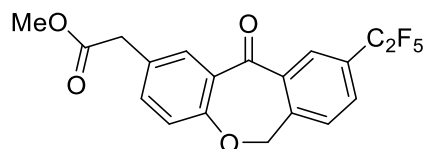

38

**Methyl 2-(11-oxo-9-(perfluoroethyl)-6,11-dihydrodibenzo[b,e]oxepin-2-yl)acetate (38)**, Colorless liquid, 31.2 mg, 78% yield,  $R_f = 0.3$  (petroleum ether: ethyl acetate, 5:1, v/v).

$^1\text{H NMR}$  (400 MHz,  $\text{CDCl}_3$ )  $\delta$  8.38 (d,  $J = 2.4$  Hz, 1H), 7.97 (d,  $J = 7.8$  Hz, 1H), 7.70 (d,  $J = 2.5$  Hz, 1H), 7.59 (t,  $J = 7.5$  Hz, 1H), 7.50 (t,  $J = 7.6$  Hz, 1H), 7.38 (d,  $J = 7.4$  Hz, 1H), 5.25 (s, 2H), 3.73 (s, 3H), 3.71 (s, 2H).

$^{13}\text{C NMR}$  (101 MHz,  $\text{CDCl}_3$ )  $\delta$  189.4, 171.3, 159.3, 139.3, 137.6, 136.0, 135.7 (t,  $J = 8.7$  Hz), 133.5, 130.4, 129.6, 128.1, 127.9, 127.9, 120.5 (t,  $J = 22.2$  Hz), 74.8, 52.5, 40.0,  $^{13}\text{C NMR}$  for  $\text{C}_2\text{F}_5$  could not be assigned.

$^{19}\text{F NMR}$  (376 MHz,  $\text{CDCl}_3$ )  $\delta$  -83.35(s, 3F), -110.68(s, 2F).

**HRMS (EI)** calcd for  $\text{C}_{19}\text{H}_{13}\text{F}_5\text{O}_4$  ( $\text{M}^+$ ): 400.0734, found: 400.0731.

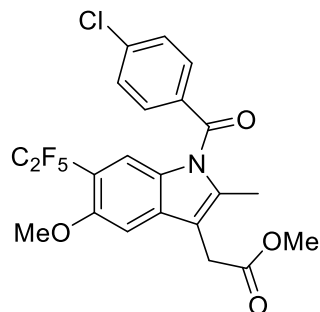

39

**Methyl 2-(1-(4-chlorobenzoyl)-5-methoxy-2-methyl-6-(perfluoroethyl)-1H-indol-3-yl)acetate (39)**, White solid, 40.1 mg, 82% yield,  $R_f = 0.3$  (petroleum ether: ethyl acetate, 4:1, v/v).

$^1\text{H NMR}$  (400 MHz,  $\text{CDCl}_3$ )  $\delta$  7.65 (d,  $J = 8.5$  Hz, 2H), 7.48 (d,  $J = 8.5$  Hz, 2H), 7.18 (s, 1H), 7.05 (s, 1H), 3.91 (s, 3H), 3.72 (s, 3H), 3.69 (s, 2H), 2.39 (s, 3H).

$^{13}\text{C NMR}$  (101 MHz,  $\text{CDCl}_3$ )  $\delta$  171.1, 168.0, 154.7, 139.9, 138.6, 133.4, 133.2, 131.2, 129.7, 129.3, 114.8 (t,  $J = 10.1$  Hz), 112.5 (t,  $J = 22.5$  Hz), 112.1, 101.2, 56.4, 52.3, 30.1, 13.5,  $^{13}\text{C NMR}$  for  $\text{C}_2\text{F}_5$  could not be assigned.

$^{19}\text{F NMR}$  (376 MHz,  $\text{CDCl}_3$ )  $\delta$  -83.67(s, 3F), -110.68(s, 2F).

**HRMS (EI)** calcd for  $C_{22}H_{17}ClF_5NO_4$  ( $M$ )<sup>+</sup>: 489.0766, found: 489.0762.

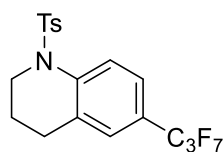

**40**

**6-(perfluoropropyl)-1-tosyl-1,2,3,4-tetrahydroquinoline (40)**, Colorless liquid, 32.4 mg, 75% yield,  $R_f$ =0.3 (petroleum ether: ethyl acetate, 5:1, v/v).

**<sup>1</sup>H NMR (400 MHz, CDCl<sub>3</sub>)**  $\delta$  7.93 (d,  $J$  = 8.7 Hz, 1H), 7.51 (d,  $J$  = 8.4 Hz, 2H), 7.36 (d,  $J$  = 11.1 Hz, 1H), 7.22 (d,  $J$  = 8.2 Hz, 3H), 3.87 – 3.79 (m, 2H), 2.57 (t,  $J$  = 6.6 Hz, 2H), 2.39 (s, 3H), 1.71 (dt,  $J$  = 12.5, 6.5 Hz, 2H).

**<sup>13</sup>C NMR (101 MHz, CDCl<sub>3</sub>)**  $\delta$  144.2, 140.5, 136.5, 130.4, 129.9, 127.8 (t,  $J$  = 6.6 Hz), 127.1, 125.0 (t,  $J$  = 6.5 Hz), 124.4 (t,  $J$  = 24.4 Hz), 124.1, 46.7, 27.1, 21.6, 21.4, <sup>13</sup>C NMR for C<sub>3</sub>F<sub>7</sub> could not be assigned.

**<sup>19</sup>F NMR (376 MHz, CDCl<sub>3</sub>)**  $\delta$  -80.05 (t,  $J$  = 9.7 Hz, 3F), -111.46 (q,  $J$  = 10.0 Hz, 2F), -126.49 (s, 2F).

**HRMS (EI)** calcd for  $C_{19}H_{16}F_7NO_2S$  ( $M$ )<sup>+</sup>: 455.0790, found: 455.0790.

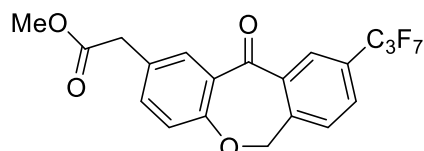

**41**

**Methyl 2-(11-oxo-9-(perfluoropropyl)-6,11-dihydrodibenzo[b,e]oxepin-2-yl)acetate (41)**, Colorless liquid, 31.5 mg, 67% yield,  $R_f$  =0.3 (petroleum ether: ethyl acetate, 5:1, v/v).

**<sup>1</sup>H NMR (400 MHz, CDCl<sub>3</sub>)**  $\delta$  8.38 (d,  $J$  = 2.4 Hz, 1H), 7.97 (d,  $J$  = 7.8 Hz, 1H), 7.67 (d,  $J$  = 2.5 Hz, 1H), 7.58 (t,  $J$  = 7.5 Hz, 1H), 7.49 (t,  $J$  = 7.6 Hz, 1H), 7.37 (d,  $J$  = 7.4 Hz, 1H), 5.22 (s, 2H), 3.72 (s, 3H), 3.70 (s, 2H).

**<sup>13</sup>C NMR (101 MHz, CDCl<sub>3</sub>)**  $\delta$  189.4, 171.3, 159.4, 139.3, 137.7, 136.0, 135.8 (d,  $J$  = 9.1 Hz), 133.5, 130.4, 129.6, 128.1, 127.9, 127.8, 120.6 (t,  $J$  = 22.6 Hz), 74.8, 52.5, 40.0, <sup>13</sup>C NMR for C<sub>3</sub>F<sub>7</sub> could not be assigned.

**<sup>19</sup>F NMR (376 MHz, CDCl<sub>3</sub>)**  $\delta$  -74.61 – -88.53 (m, 3F), -107.44 (q,  $J$  = 9.0, 8.3 Hz,

2F), -125.16 (d,  $J = 7.1$  Hz, 2F).

**HRMS (EI)** calcd for  $C_{20}H_{13}F_7O_4$  ( $M$ )<sup>+</sup>: 450.0702, found: 450.0696.

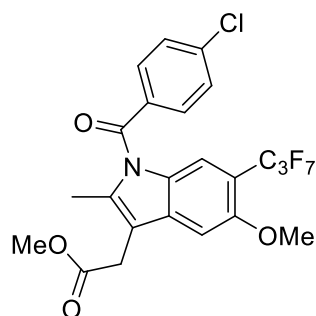

**42**

**Methyl 2-(1-(4-chlorobenzoyl)-5-methoxy-2-methyl-6-(perfluoropropyl)-1H-indol-3-yl)acetate (42)**, White solid, 37.7 mg, 70% yield,  $R_f = 0.3$  (petroleum ether: ethyl acetate, 4:1, v/v).

**$^1H$  NMR (400 MHz,  $CDCl_3$ )**  $\delta$  7.65 (d,  $J = 8.5$  Hz, 2H), 7.49 (d,  $J = 8.5$  Hz, 2H), 7.14 (s, 1H), 7.05 (s, 1H), 3.90 (s, 3H), 3.72 (s, 3H), 3.69 (s, 2H), 2.40 (s, 3H).

**$^{13}C$  NMR (101 MHz,  $CDCl_3$ )**  $\delta$  171.1, 168.0, 154.9, 139.9, 138.8, 133.5, 133.2, 131.2, 129.7, 129.3, 115.2 (t,  $J = 10.1$  Hz), 112.7 (t,  $J = 22.2$  Hz), 112.1, 101.2, 56.5, 52.3, 30.1, 13.5,  $^{13}C$  NMR for  $C_3F_7$  could not be assigned.

**$^{19}F$  NMR (376 MHz,  $CDCl_3$ )**  $\delta$  -80.43 (t,  $J = 9.7$  Hz, 3F), -107.44 (q,  $J = 9.7$  Hz, 2F), -121.52 – -133.41 (m, 2F).

**HRMS (EI)** calcd for  $C_{23}H_{17}ClF_7NO_4$  ( $M$ )<sup>+</sup>: 539.0734, found: 539.0736.

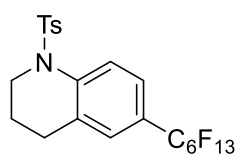

**43**

**6-(perfluorohexyl)-1-tosyl-1,2,3,4-tetrahydroquinoline (43)**, Colorless liquid, 34.5 mg, 57% yield,  $R_f = 0.3$  (petroleum ether: ethyl acetate, 5:1, v/v).

**$^1H$  NMR (400 MHz,  $CDCl_3$ )**  $\delta$  7.94 (d,  $J = 8.7$  Hz, 1H), 7.52 (d,  $J = 8.2$  Hz, 2H), 7.38 (d,  $J = 8.8$  Hz, 1H), 7.22 (d,  $J = 7.9$  Hz, 3H), 3.92 – 3.72 (m, 2H), 2.58 (t,  $J = 6.6$  Hz, 2H), 2.39 (s, 3H), 1.71 (p,  $J = 6.5$  Hz, 2H).

**$^{13}C$  NMR (101 MHz,  $CDCl_3$ )**  $\delta$  144.2, 140.5, 136.5, 130.3, 129.9, 127.9 (t,  $J = 6.2$  Hz), 127.2, 125.2 (t,  $J = 6.3$  Hz), 124.7 (t,  $J = 24.4$  Hz), 124.1, 46.8, 27.1, 21.6, 21.4,  $^{13}C$

NMR for C<sub>6</sub>F<sub>13</sub> could not be assigned.

**<sup>19</sup>F NMR (376 MHz, CDCl<sub>3</sub>)** δ -80.82 (t, *J* = 9.7 Hz, 3F), -110.46 (t, *J* = 14.5 Hz, 2F), -121.47 (t, *J* = 14.4 Hz, 2F), -121.93 (t, *J* = 11.8 Hz, 2F), -122.66 – -123.25 (m, 2F), -126.06 – -126.26 (m, 2F).

**HRMS (EI)** calcd for C<sub>22</sub>H<sub>16</sub>F<sub>13</sub>NO<sub>2</sub>S (M)<sup>+</sup>: 605.0694, found: 605.0687.

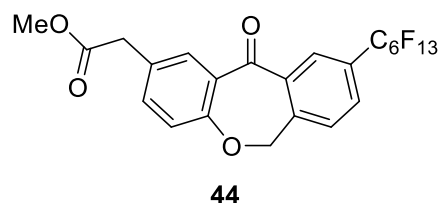

**Methyl 2-(11-oxo-9-(perfluorohexyl)-6,11-dihydrodibenzo[b,e]oxepin-2-yl)acetate (44)**, Colorless liquid, 37.2 mg, 62% yield, *R*<sub>f</sub>=0.3 (petroleum ether: ethyl acetate, 5:1, v/v).

**<sup>1</sup>H NMR (400 MHz, CDCl<sub>3</sub>)** δ 8.39 (d, *J* = 2.4 Hz, 1H), 7.98 (d, *J* = 7.7 Hz, 1H), 7.69 (d, *J* = 2.5 Hz, 1H), 7.59 (t, *J* = 7.5 Hz, 1H), 7.50 (t, *J* = 7.6 Hz, 1H), 7.38 (d, *J* = 8.7 Hz, 1H), 5.24 (s, 2H), 3.72 (s, 3H), 3.71 (s, 2H).

**<sup>13</sup>C NMR (101 MHz, CDCl<sub>3</sub>)** δ 189.3, 171.3, 159.5, 139.3, 137.7, 136.06 (t, *J* = 4.4 Hz), 136.05, 135.9, 133.5, 130.4, 129.6, 128.1, 127.9, 120.8 (d, *J* = 23.2 Hz), 74.8, 52.4, 40.0, <sup>13</sup>C NMR for C<sub>6</sub>F<sub>13</sub> could not be assigned.

**<sup>19</sup>F NMR (376 MHz, CDCl<sub>3</sub>)** δ -80.76 (d, *J* = 9.4 Hz, 3F), -106.61 (t, *J* = 15.2 Hz, 2F), -120.64 – -120.91 (m, 2F), -121.82 (t, *J* = 14.9 Hz, 2F), -122.59 – -122.87 (m, 2F), -126.05 – -126.26 (m, 2F).

**HRMS (EI)** calcd for C<sub>23</sub>H<sub>13</sub>F<sub>13</sub>O<sub>4</sub> (M)<sup>+</sup>: 600.0606, found: 600.0598.

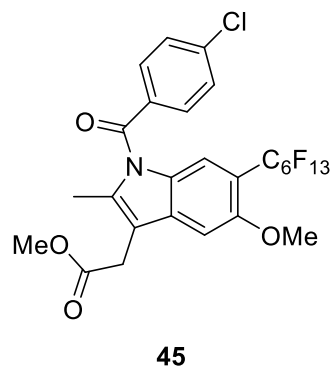

**Methyl 2-(1-(4-chlorobenzoyl)-5-methoxy-2-methyl-6-(perfluorohexyl)-1H-indol-**

**3-yl) acetate (45)**, White solid, 37.2 mg, 54% yield,  $R_f = 0.3$  (petroleum ether: ethyl acetate, 4:1, v/v).

**$^1\text{H NMR}$  (400 MHz,  $\text{CDCl}_3$ )**  $\delta$  7.64 (d,  $J = 8.5$  Hz, 2H), 7.48 (d,  $J = 8.5$  Hz, 2H), 7.12 (s, 1H), 7.05 (s, 1H), 3.90 (s, 3H), 3.72 (s, 3H), 3.69 (s, 2H), 2.41 (s, 3H).

**$^{13}\text{C NMR}$  (101 MHz,  $\text{CDCl}_3$ )**  $\delta$  171.1, 168.0, 154.9, 139.9, 138.8, 133.5, 133.2, 131.2, 129.7, 129.3, 115.2 (t,  $J = 10.1$  Hz), 112.7 (d,  $J = 22.2$  Hz), 112.1, 101.2, 56.5, 52.3, 30.1, 13.5,  $^{13}\text{C NMR}$  for  $\text{C}_6\text{F}_{13}$  could not be assigned.

**$^{19}\text{F NMR}$  (376 MHz,  $\text{CDCl}_3$ )**  $\delta$  -80.75 (t,  $J = 9.9$  Hz, 3F), -106.55 (t,  $J = 15.0$  Hz, 2F), -120.88 (d,  $J = 22.0$  Hz, 2F), -121.64 – -122.26 (m, 2F), -122.54 – -123.30 (m, 2F), -125.36 – -127.21 (m, 2F).

**HRMS (EI)** calcd for  $\text{C}_{26}\text{H}_{17}\text{ClF}_{13}\text{NO}_4$  (M) $^+$ : 689.0639, found: 689.0634.

## 8. References

- (1) Aikawa, K.; Nakamura, Y.; Yokota, Y.; Toya, W.; Mikami, K. Stable but Reactive Perfluoroalkylzinc Reagents: Application in Ligand-Free Copper-Catalyzed Perfluoroalkylation of Aryl Iodides. *Chem. Eur. J.* **2015**, *21* (1), 96–100.
- (2) Xu, H.; Li, X.; Dong, Y.; Ji, S.; Zuo, J.; Lv, J.; Yang, D. Thianthrenium-Enabled Phosphorylation of Aryl C–H Bonds via Electron Donor–Acceptor Complex Photoactivation. *Org. Lett.* **2023**, *25* (20), 3784–3789.
- (3) Ye, F.; Berger, F.; Jia, H.; Ford, J.; Wortman, A.; Börgel, J.; Genicot, C.; Ritter, T. Aryl Sulfonium Salts for Site-Selective Late-Stage Trifluoromethylation. *Angew. Chem. Int. Ed.* **2019**, *58* (41), 14615–14619.
- (4) Jiang, X.; Gong, W.; Li, X.; Wang, S.; Gu, Z.; Yang, Y.; Zeng, X. Pd-Catalyzed Divergent Site-Selective Difluoromethylation and Difluoromethylcarbonylation of Aryl Sulfonium Salts. *ACS Catal.* **2024**, *14* (18), 13557–13566.
- (5) Zhao, Y.; Empel, C.; Liang, W.; Koenigs, R. M.; Patureau, F. W. Gem-Difluoroallylation of Aryl Sulfonium Salts. *Org. Lett.* **2022**, *24* (48), 8753–8758.
- (6) Wu, Y.; Huang, Y.-H.; Chen, X.-Y.; Wang, P. Site-Selective Silylation of Arenes Mediated by Thianthrene S-Oxide. *Org. Lett.* **2020**, *22* (16), 6657–6661.
- (7) Peng, B.; Dai, L.; Liu, R. Thianthrenation-Enabled Pyrrolidin-2-yl and Tetrahydrofuran-2-yl Methylation of (Hetero)Arenes. *Org. Lett.* **2023**, *25* (15), 2606–2610.
- (8) Cai, Y.; Chatterjee, S.; Ritter, T. Photoinduced Copper-Catalyzed Late-Stage Azidoarylation of Alkenes via Arylthianthrenium Salts. *J. Am. Chem. Soc.* **2023**, *145* (25), 13542–13548.
- (9) Engl, P. S.; Häring, A. P.; Berger, F.; Berger, G.; Pérez-Bitrián, A.; Ritter, T. C–N Cross-Couplings for Site-Selective Late-Stage Diversification via Aryl Sulfonium Salts. *J. Am. Chem. Soc.* **2019**, *141* (34), 13346–13351.
- (10) Matier, C. D.; Schwaben, J.; Peters, J. C.; Fu, G. C. Copper-Catalyzed Alkylation of Aliphatic Amines Induced by Visible Light. *J. Am. Chem. Soc.* **2017**, *139* (49), 17707–17710.



## 9. NMR Spectra

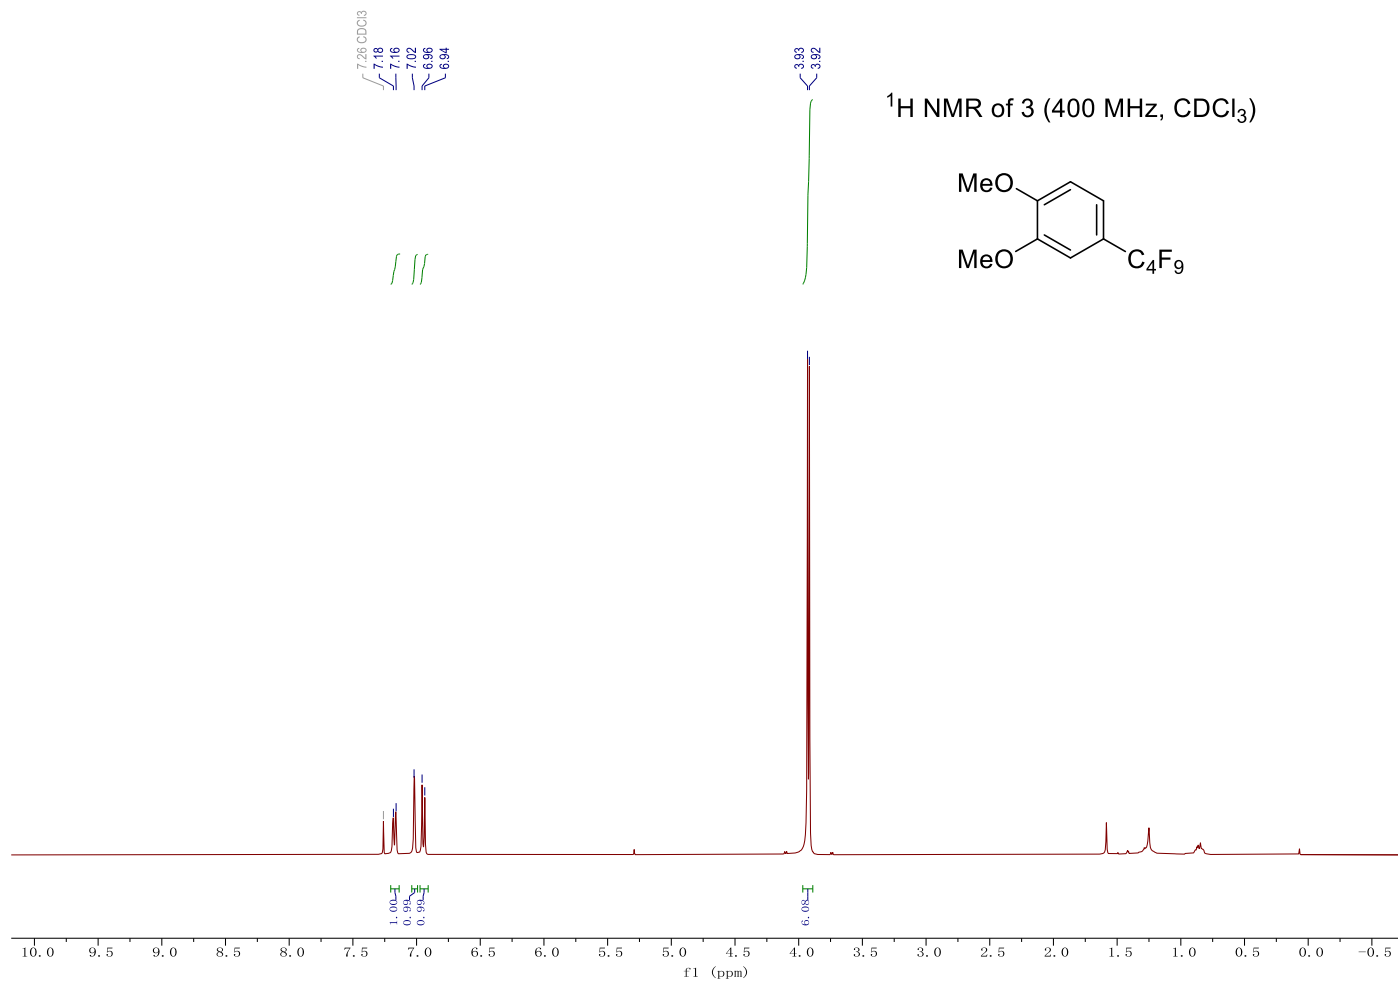

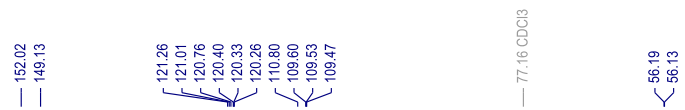

<sup>13</sup>C NMR of 3 (101 MHz, CDCl<sub>3</sub>)

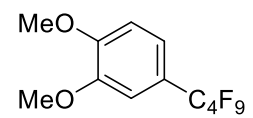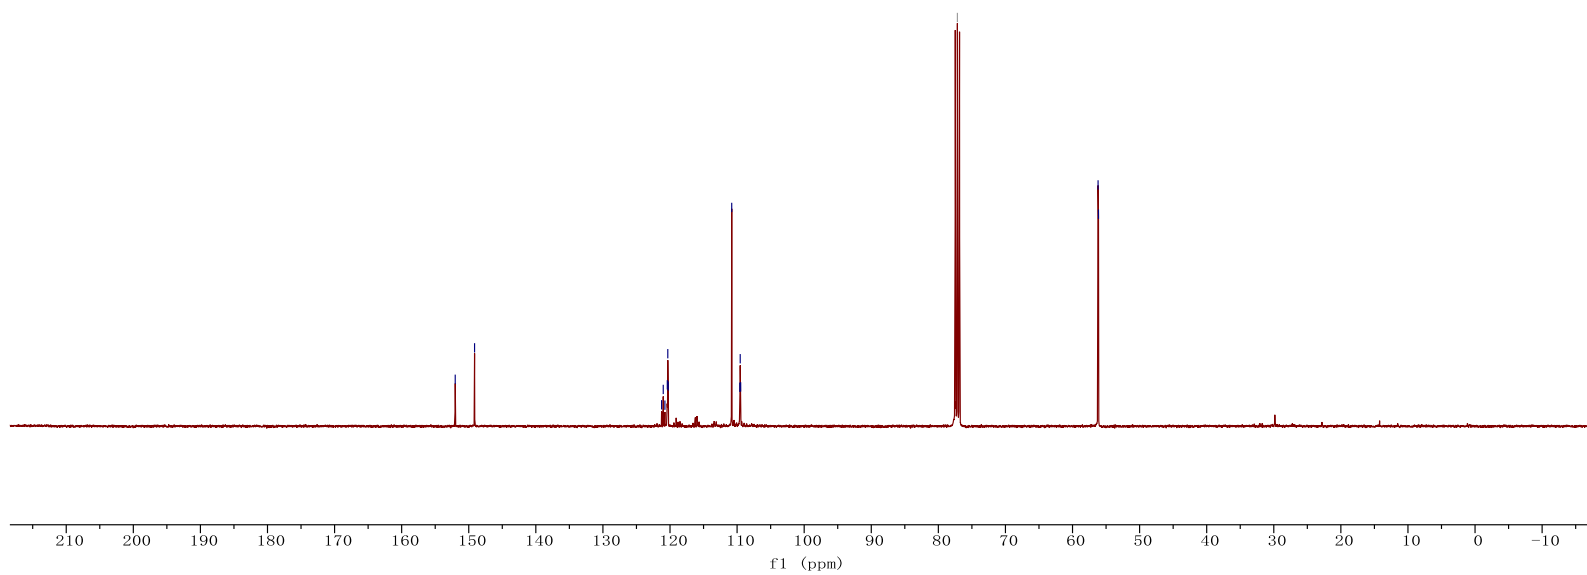

-81.04  
-81.07  
-81.10

-109.89  
-109.92  
-109.96  
-122.75  
-122.77  
-122.80  
-122.83  
-125.65  
-125.68  
-125.69  
-125.72

$^{19}\text{F}$  NMR of 3 (376 MHz,  $\text{CDCl}_3$ )

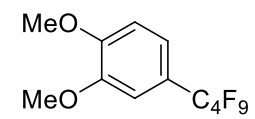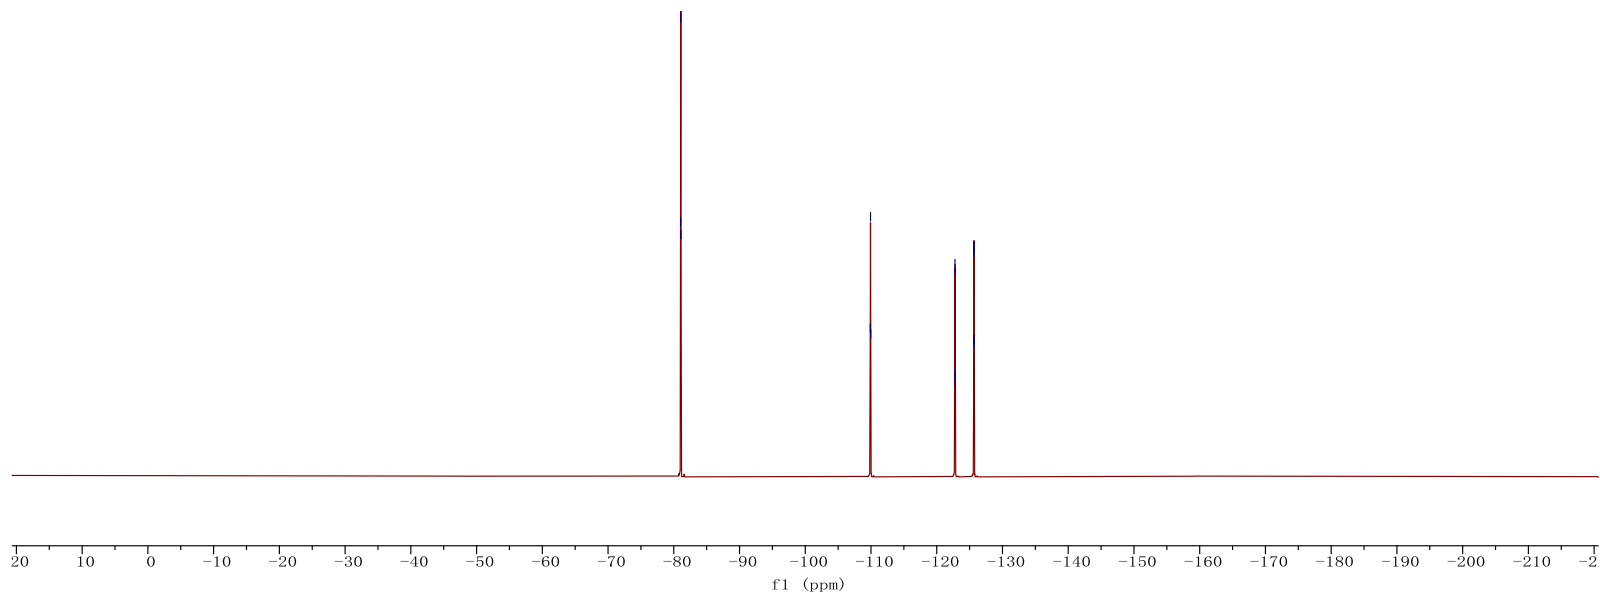

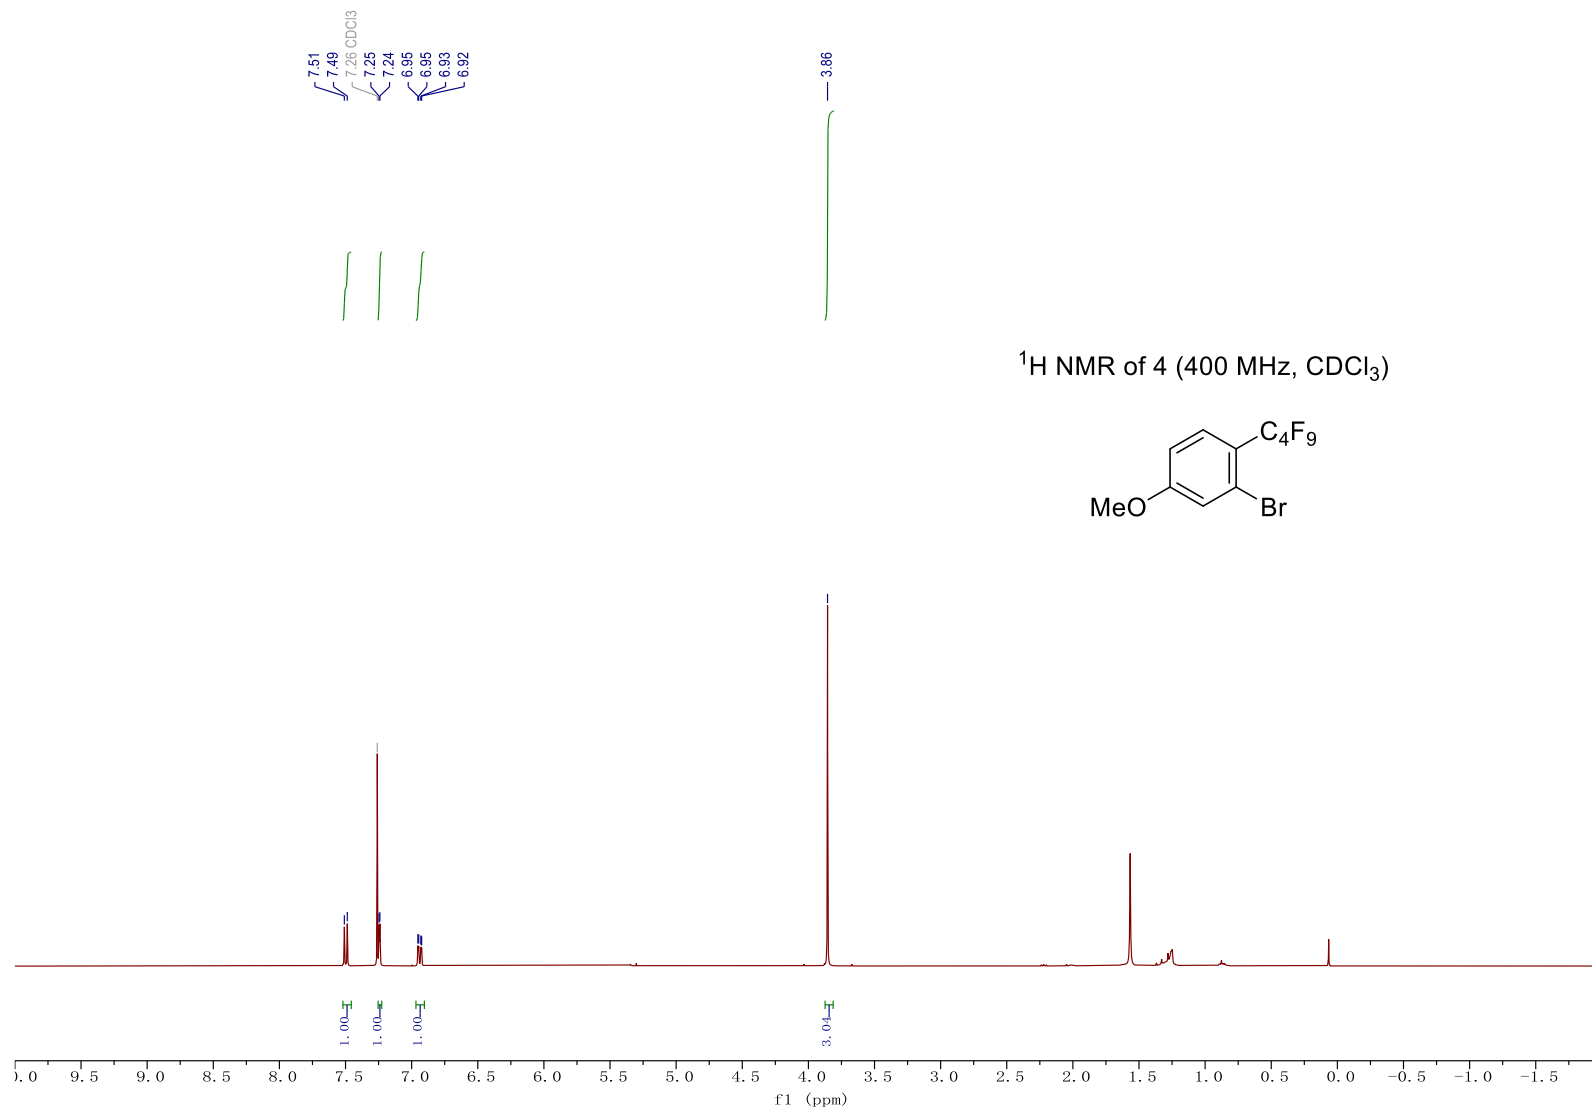

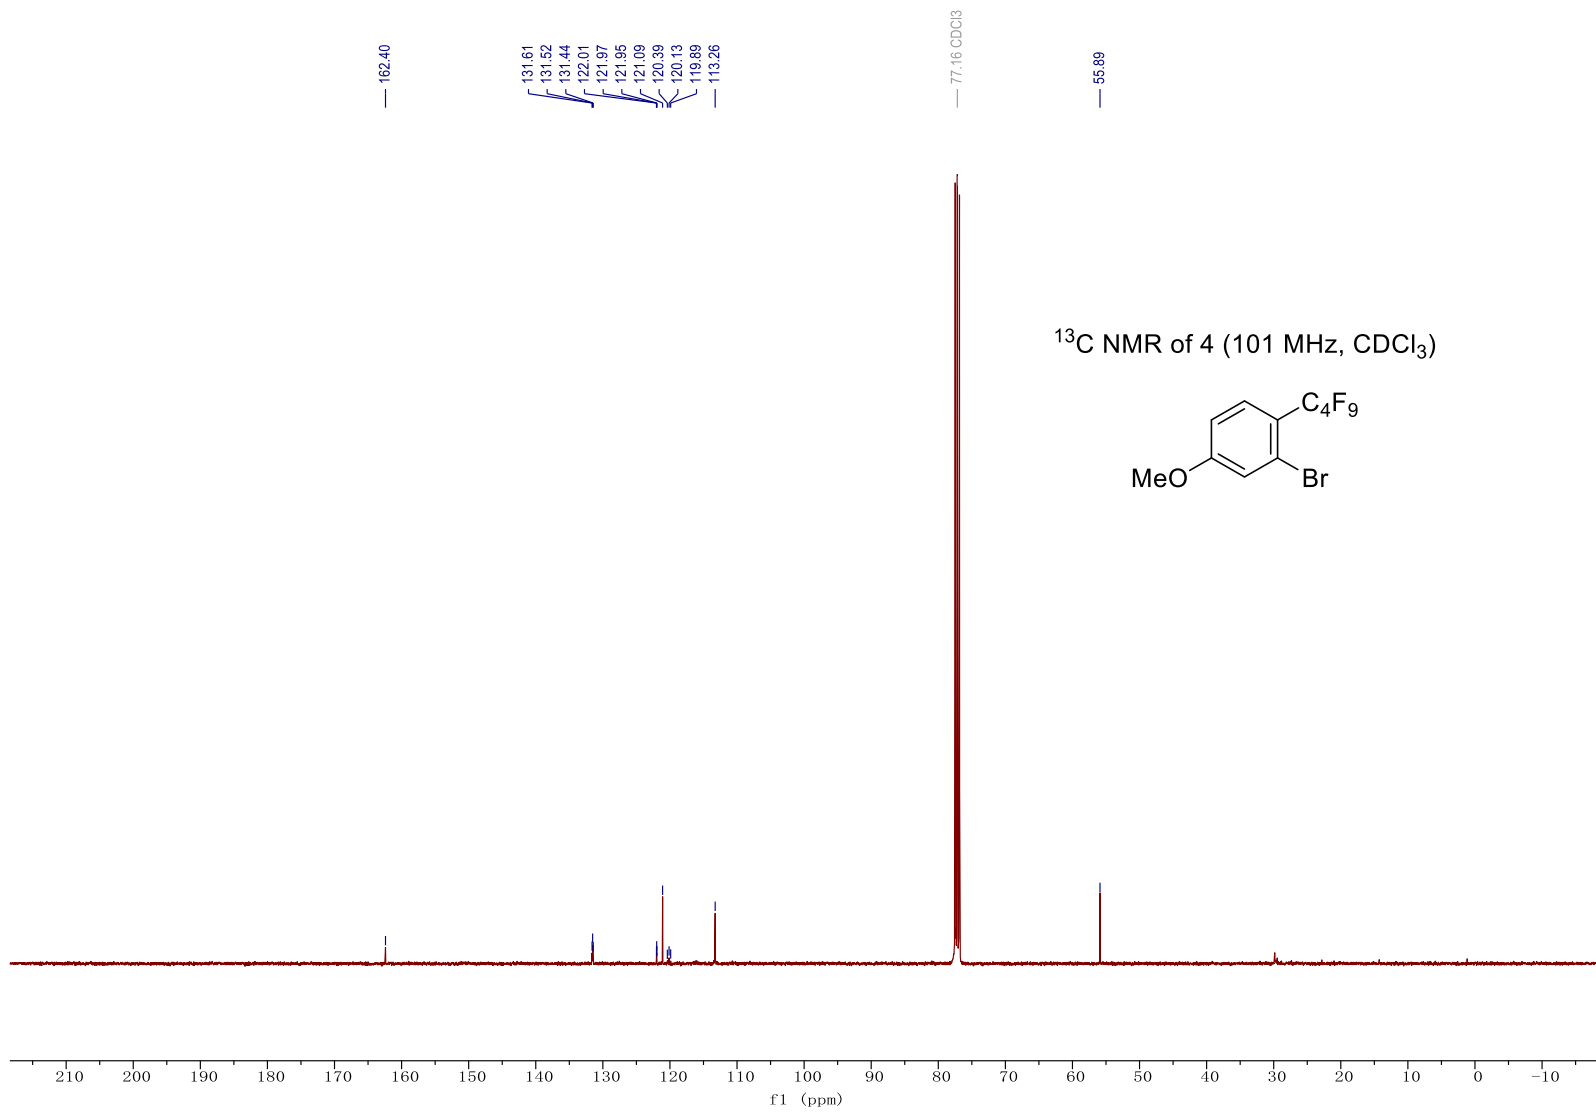

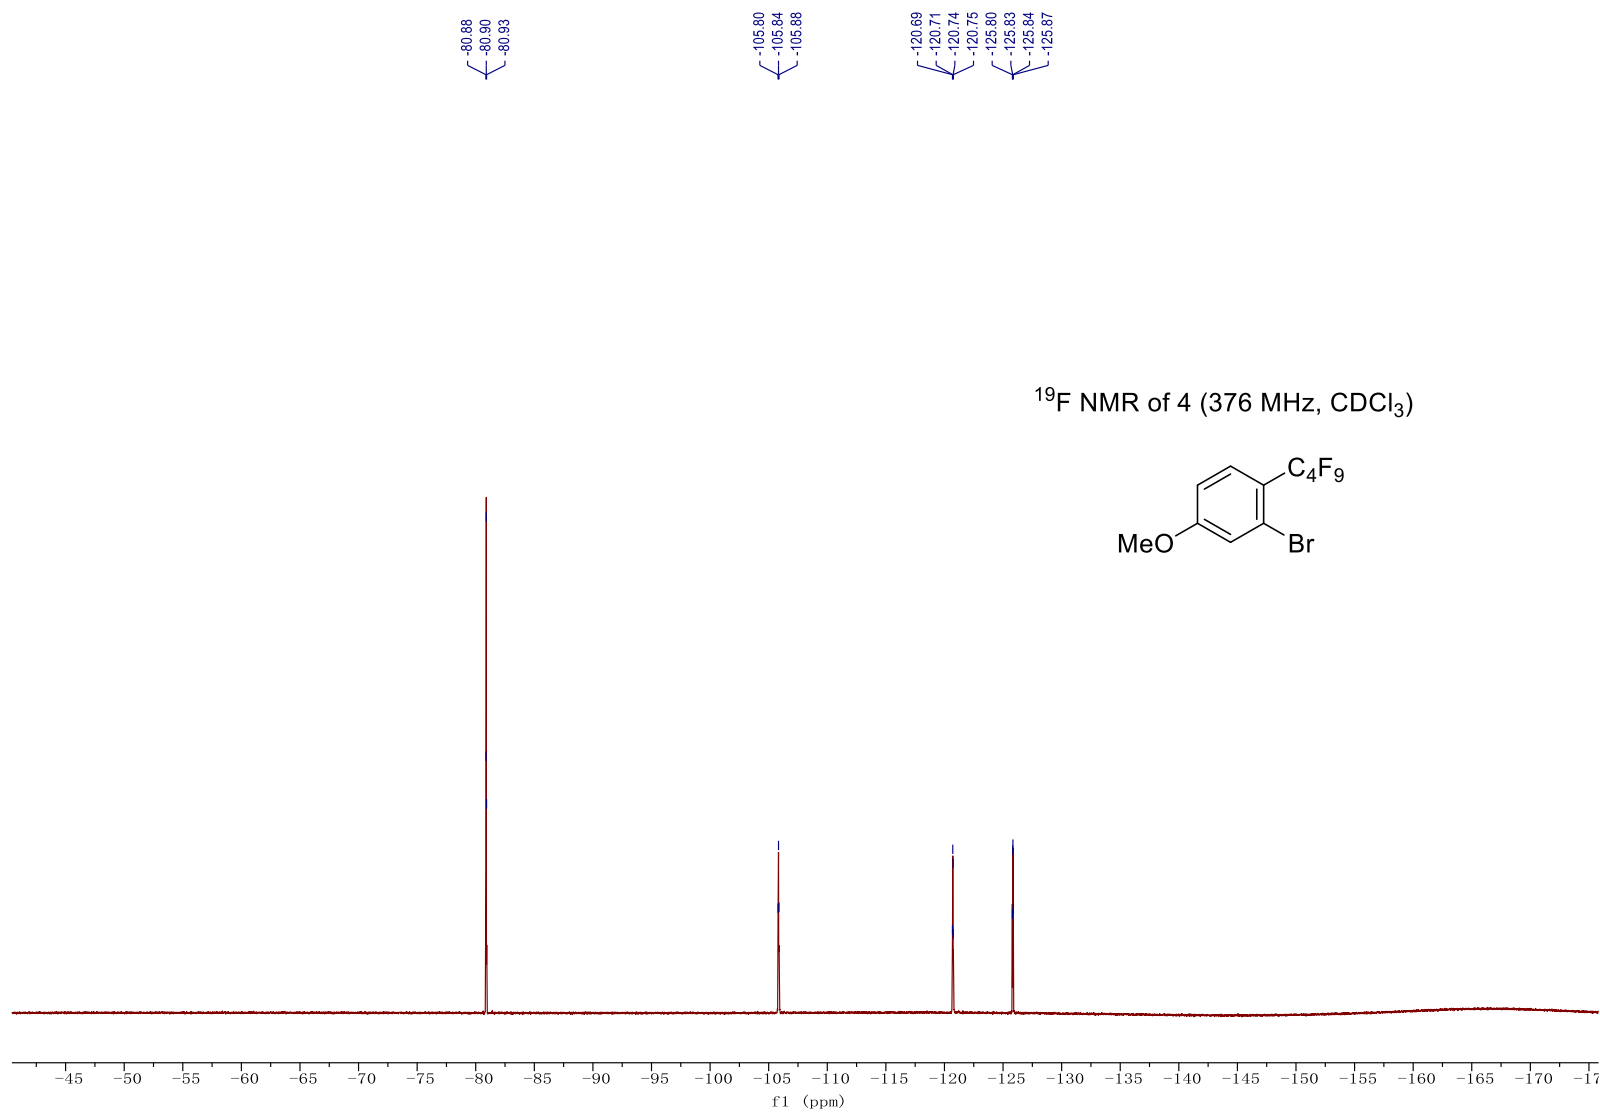

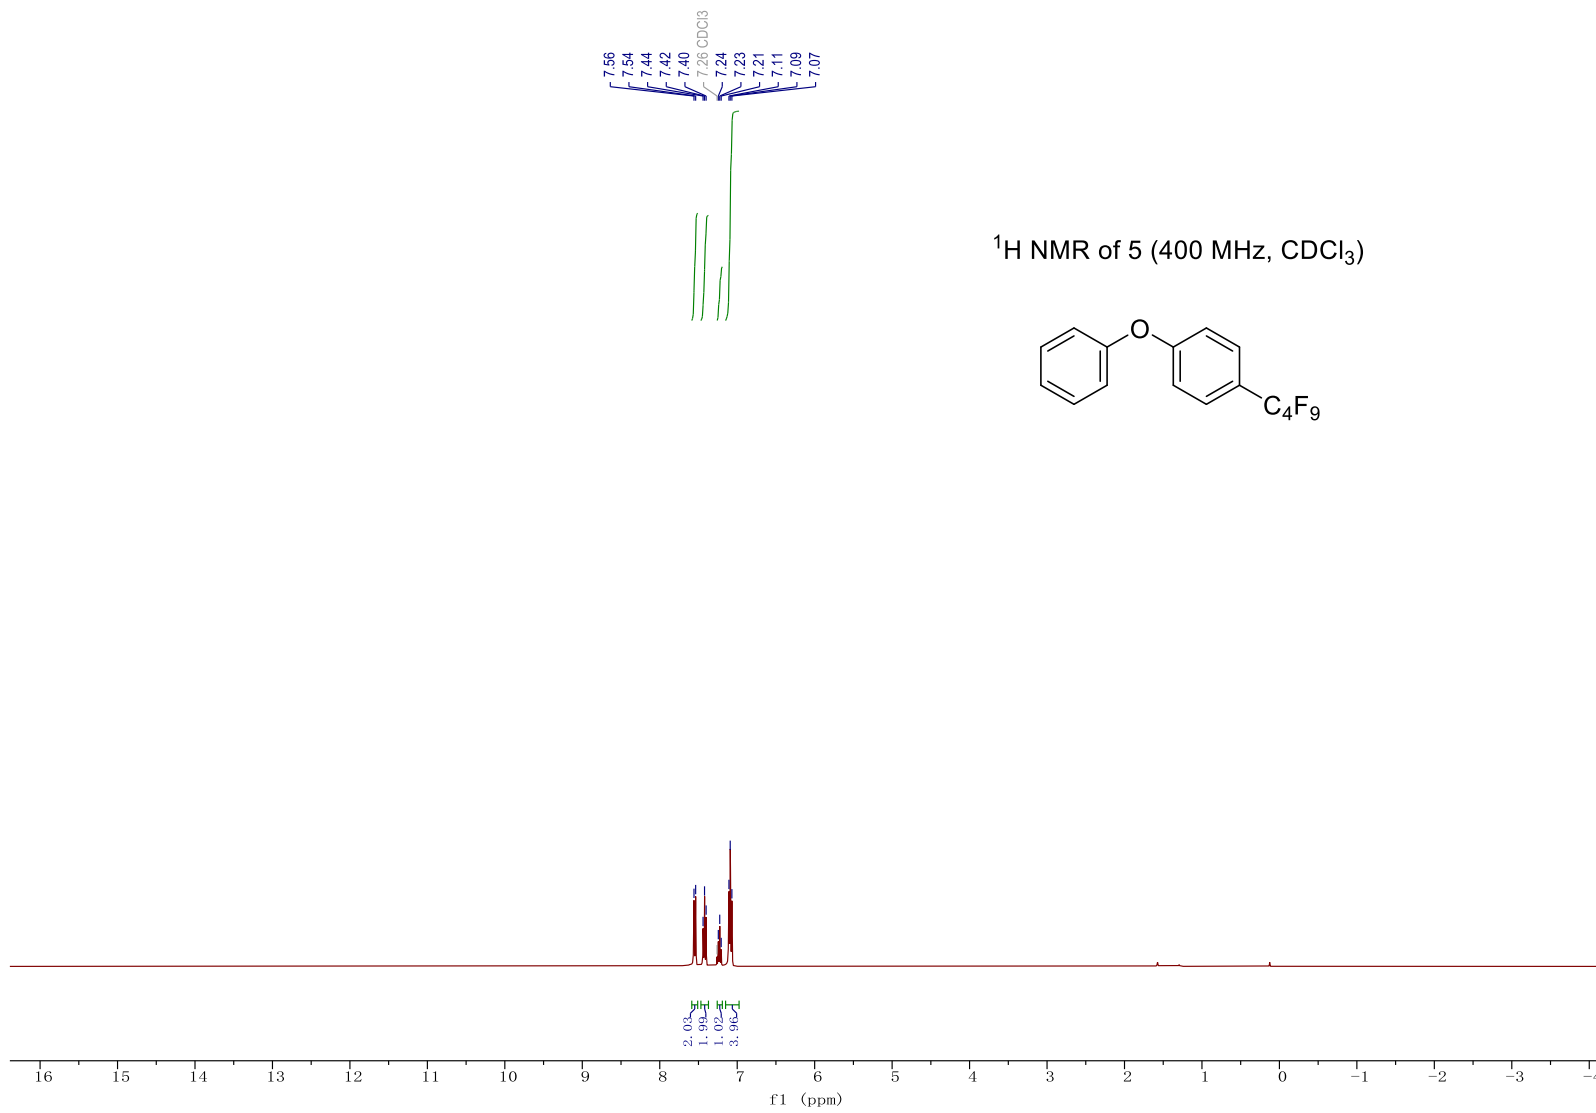

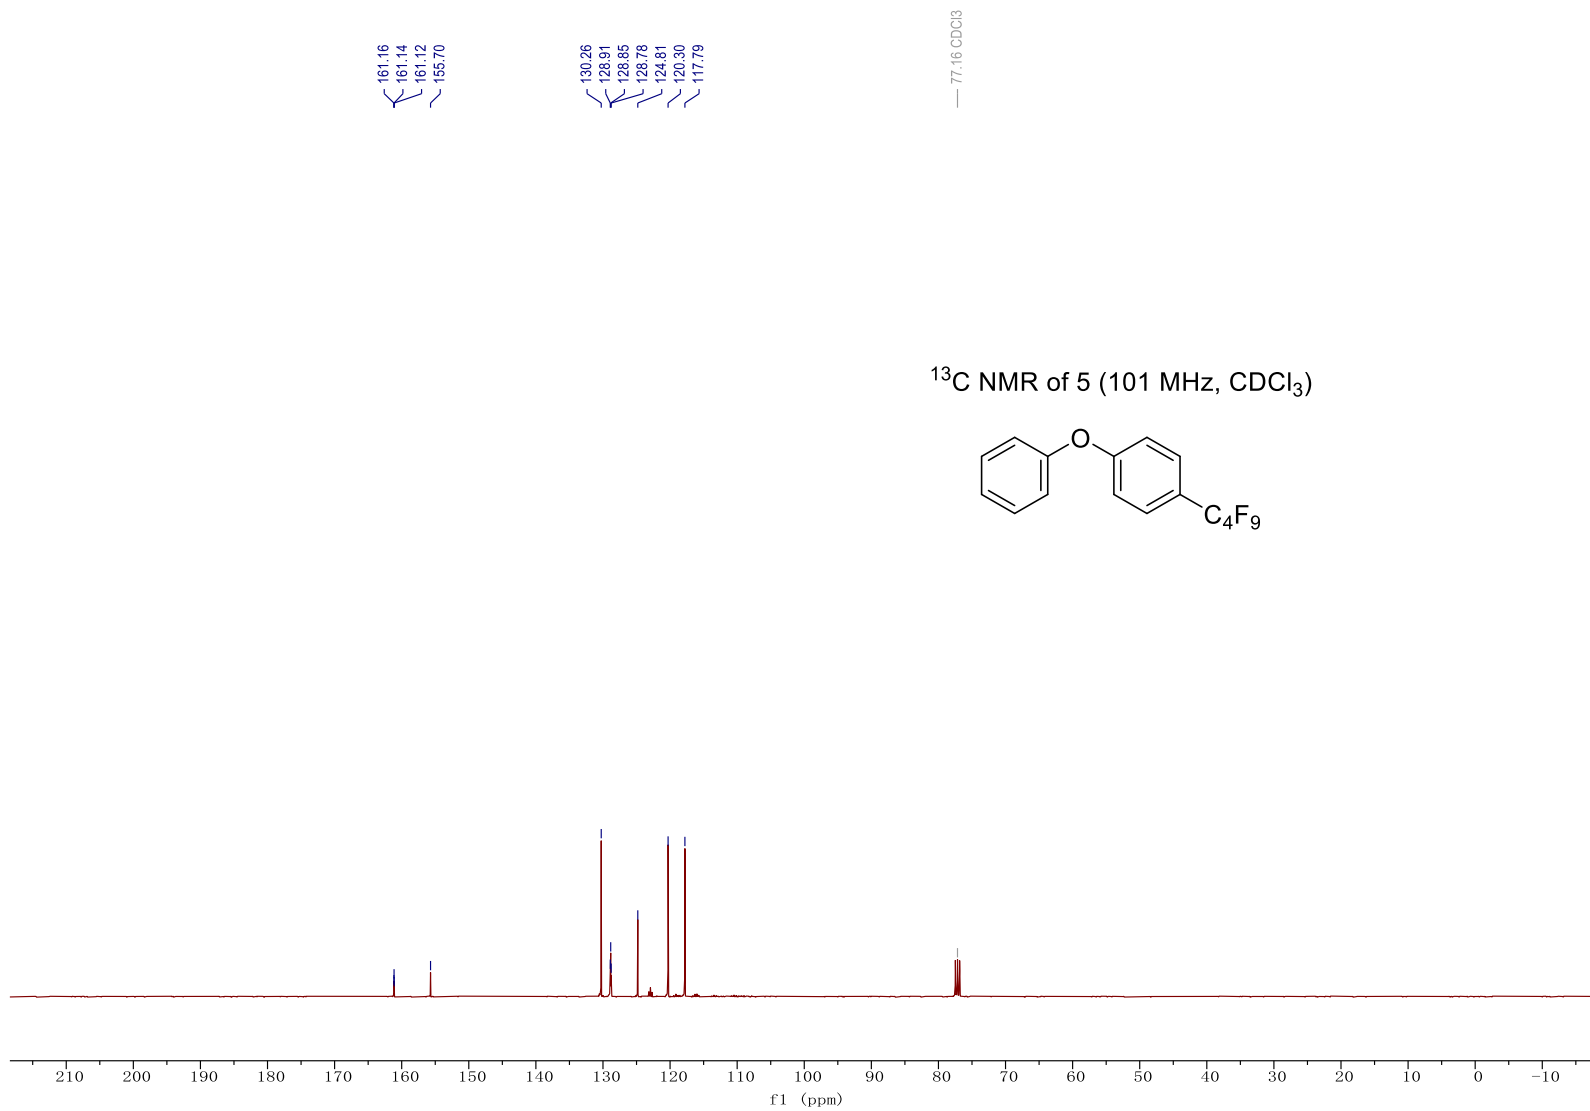

-81.11  
-81.13  
-81.16

-110.18  
-110.22  
-110.26  
-122.80  
-122.82  
-122.85  
-122.88  
-123.86  
-125.69  
-125.71  
-125.73

$^{19}\text{F}$  NMR of 5 (376 MHz,  $\text{CDCl}_3$ )

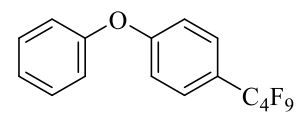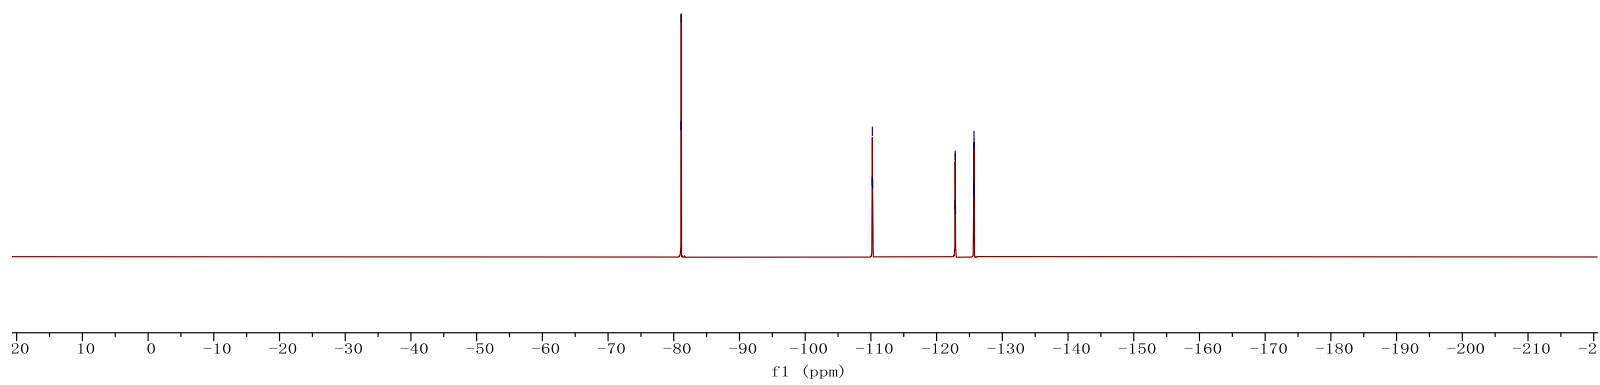

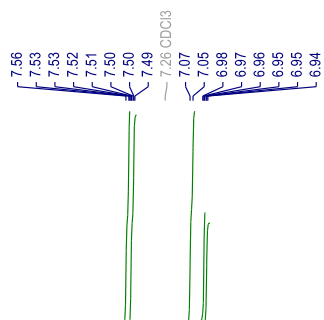

<sup>1</sup>H NMR of 6 (400 MHz, CDCl<sub>3</sub>)

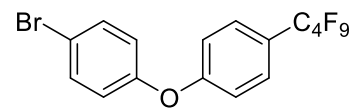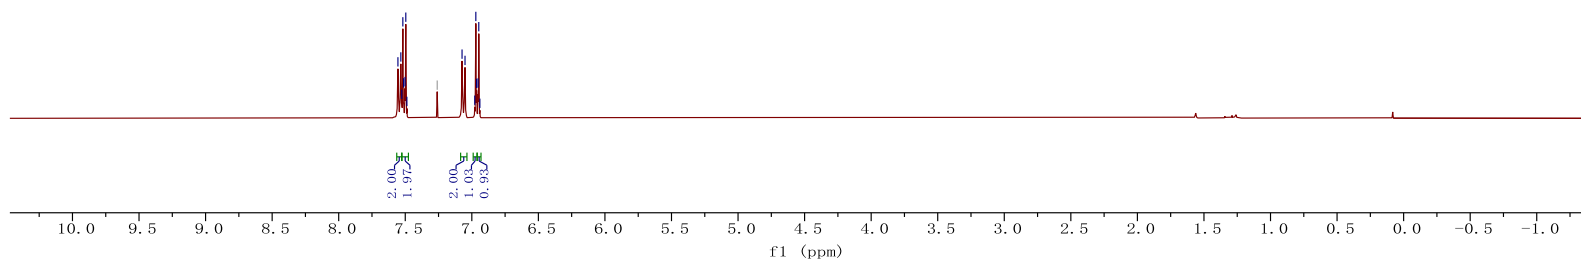

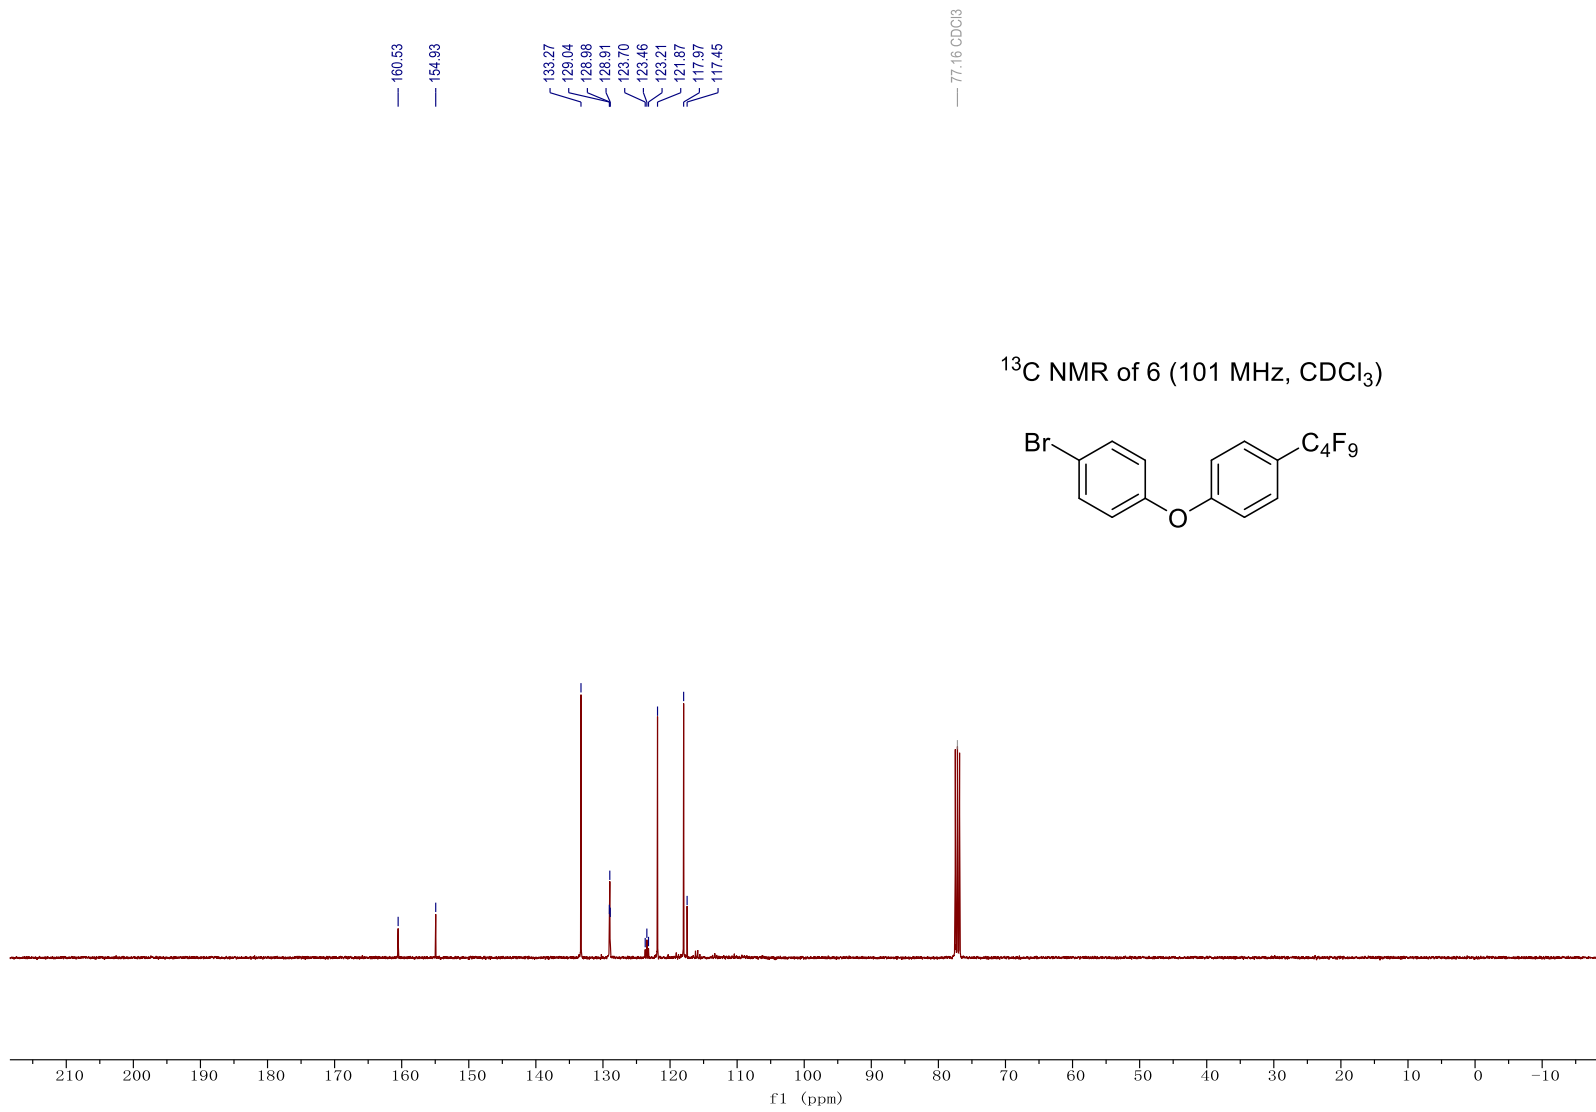

-81.01  
-81.04  
-81.06

-110.22  
-110.26  
-110.30  
-122.74  
-122.76  
-122.79  
-122.82  
-125.61  
-125.64  
-125.68

<sup>19</sup>F NMR of 6 (376 MHz, CDCl<sub>3</sub>)

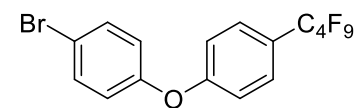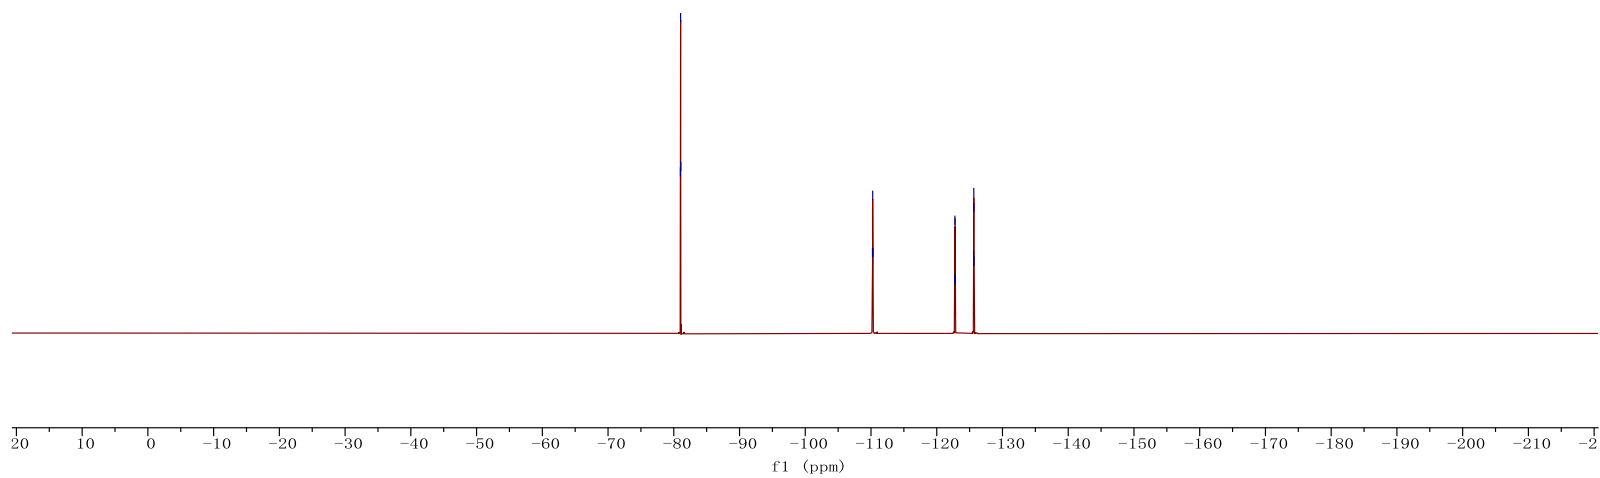

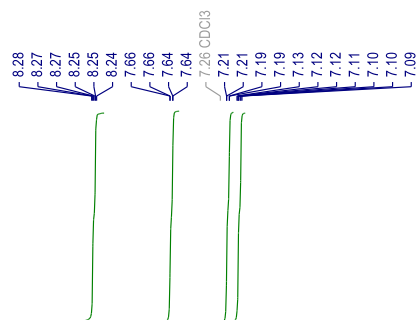

<sup>1</sup>H NMR of 7 (400 MHz, CDCl<sub>3</sub>)

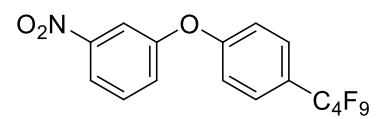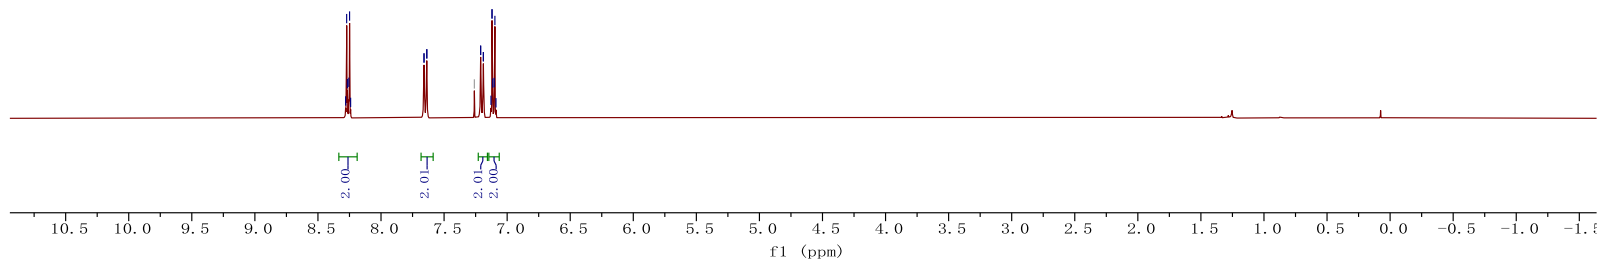

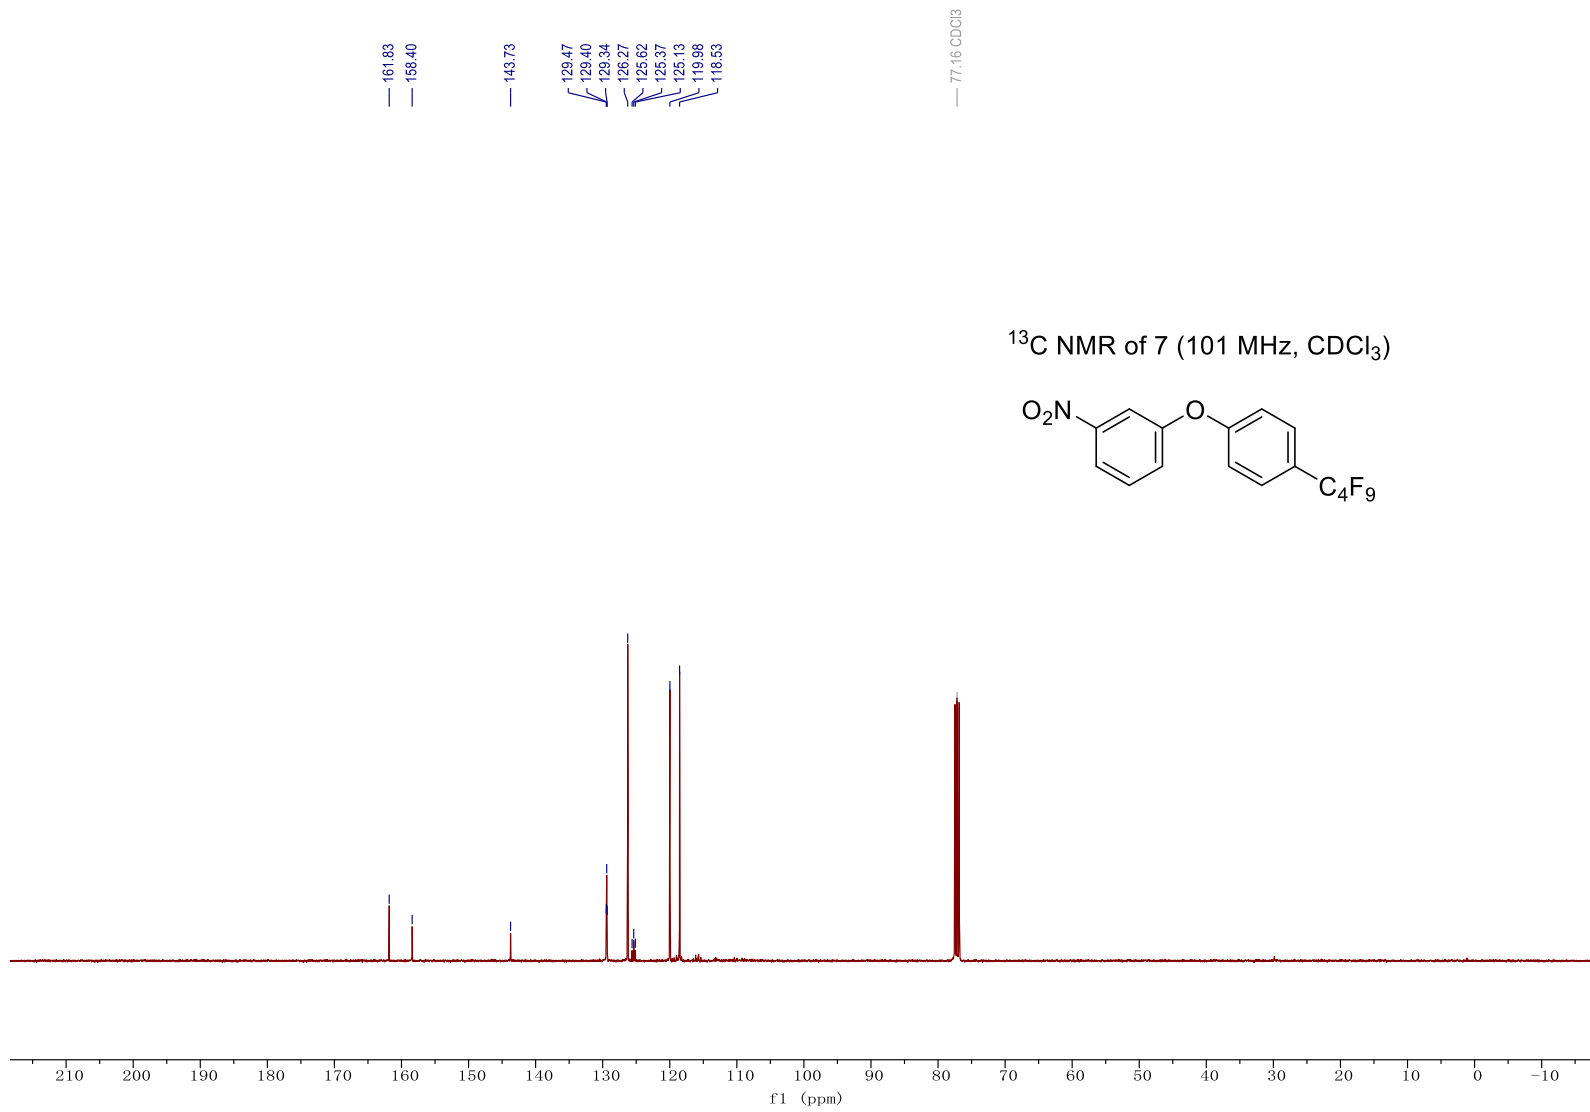

-81.00  
-81.02  
-81.05

-110.39  
-110.43  
-110.46  
-122.65  
-122.67  
-122.70  
-122.73  
-125.54  
-125.55  
-125.58  
-125.59  
-125.61

$^{19}\text{F}$  NMR of 7 (376 MHz,  $\text{CDCl}_3$ )

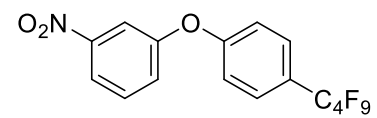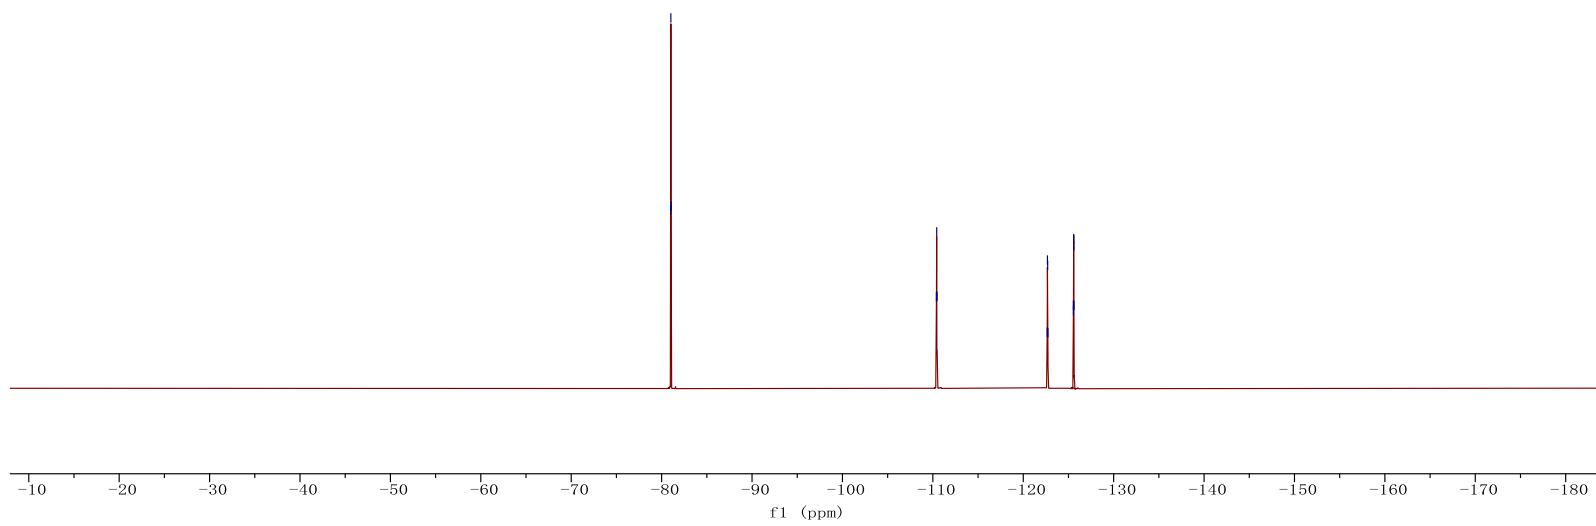

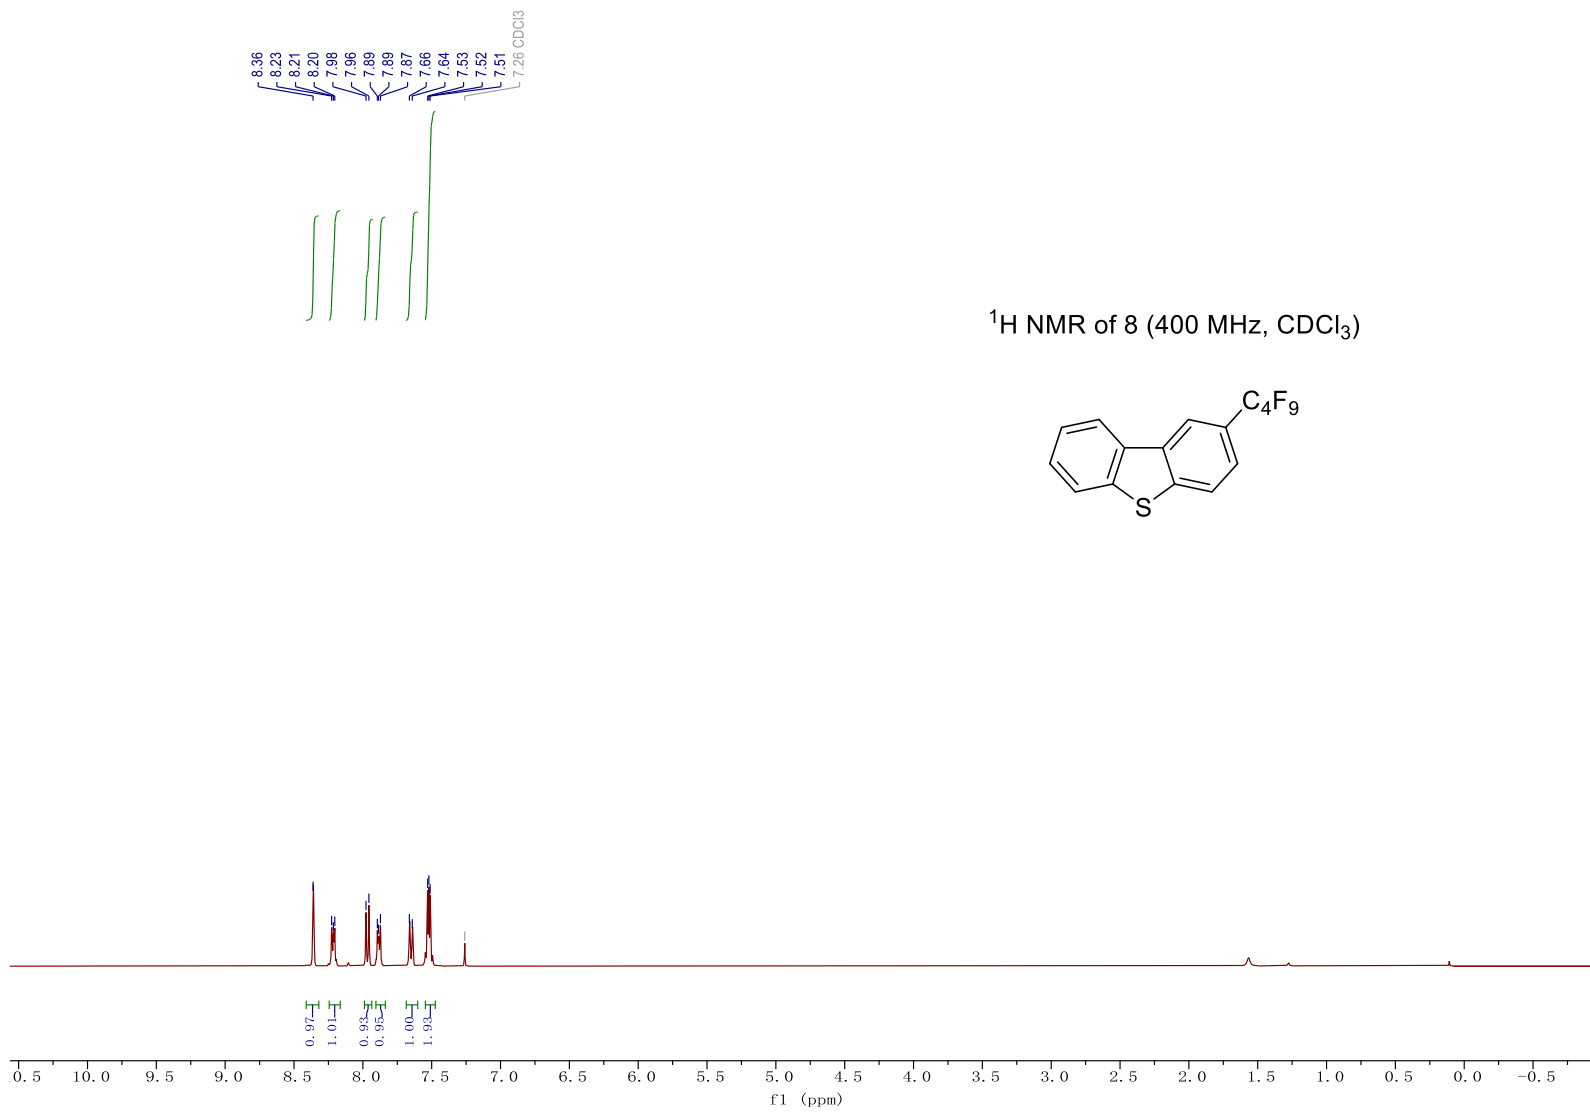

143.45  
139.93  
135.73  
134.78  
127.80  
125.17  
125.06  
124.57  
124.51  
124.44  
123.24  
123.07  
122.05  
120.42  
120.35  
120.28

77.16 CDCl<sub>3</sub>

<sup>13</sup>C NMR of 8 (101 MHz, CDCl<sub>3</sub>)

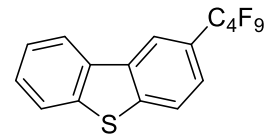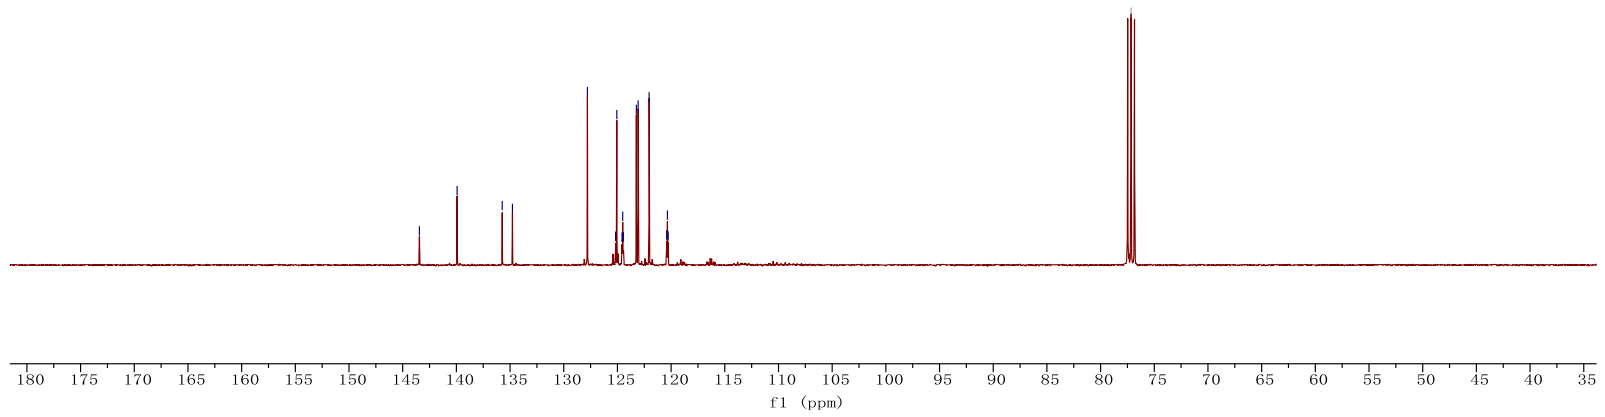

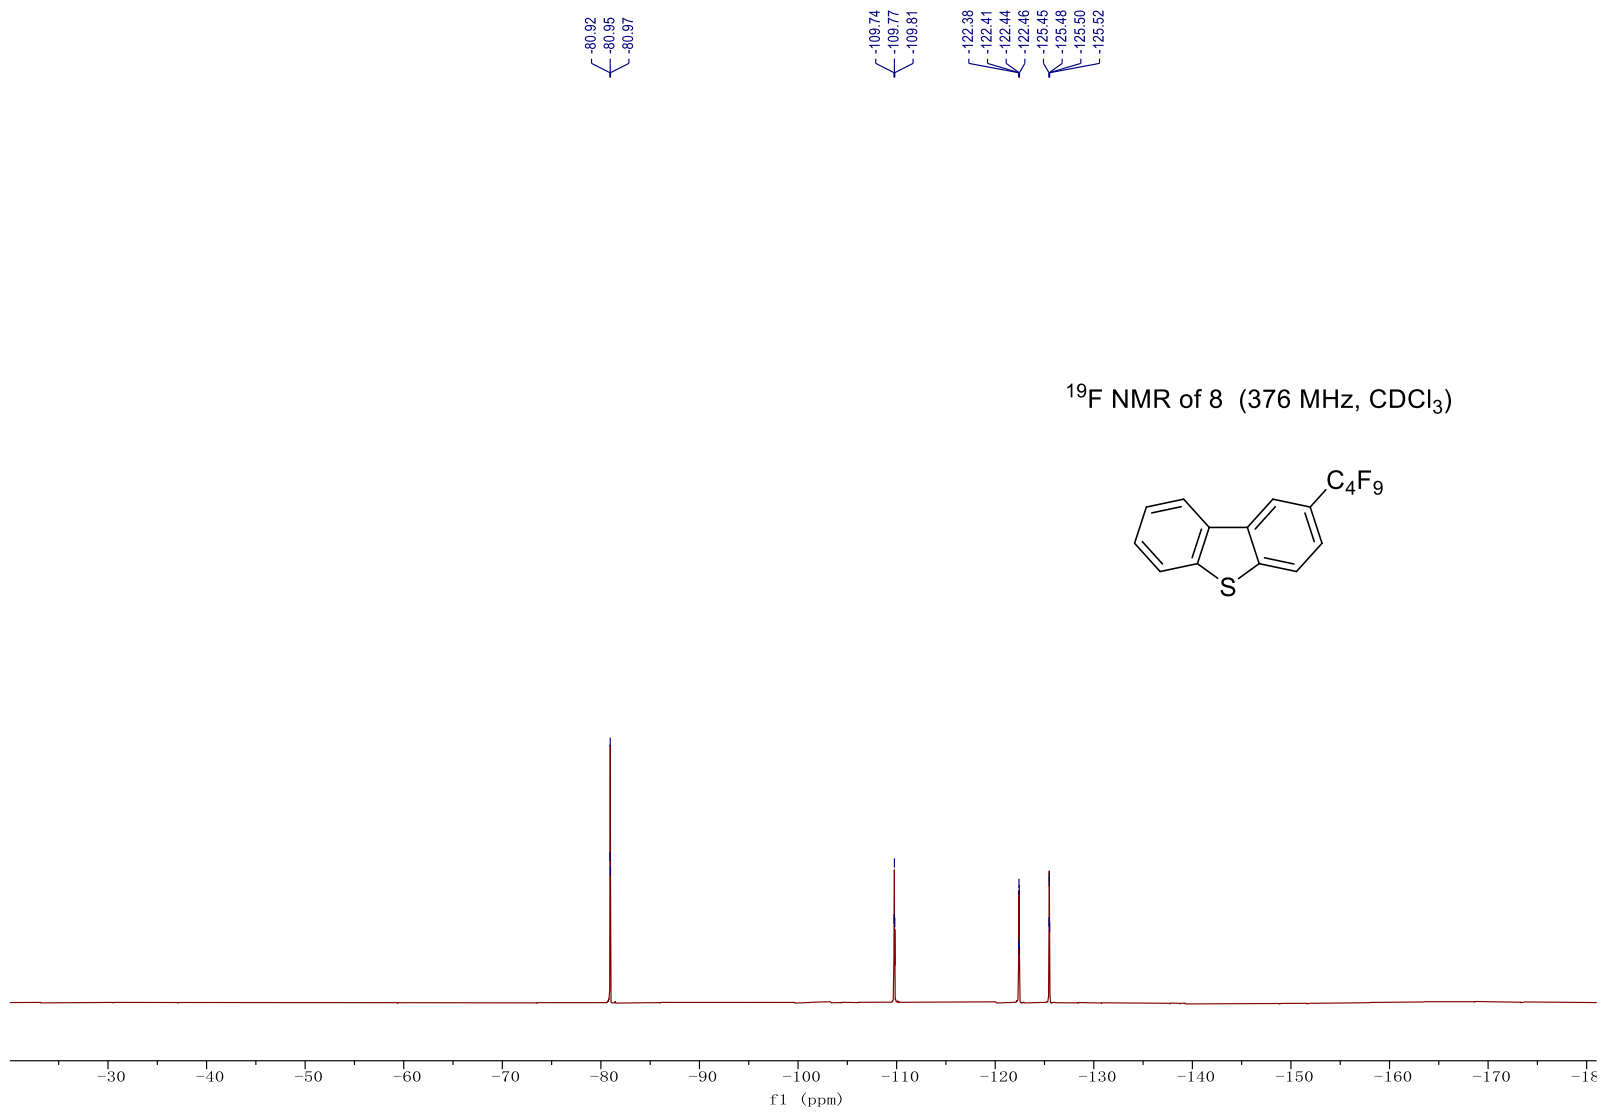

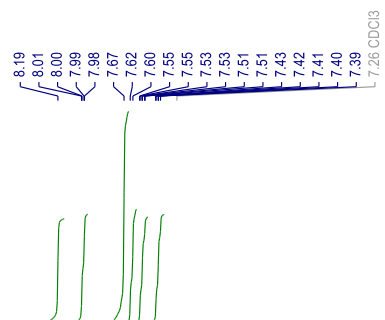

$^1\text{H}$  NMR of 9 (400 MHz,  $\text{CDCl}_3$ )

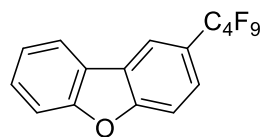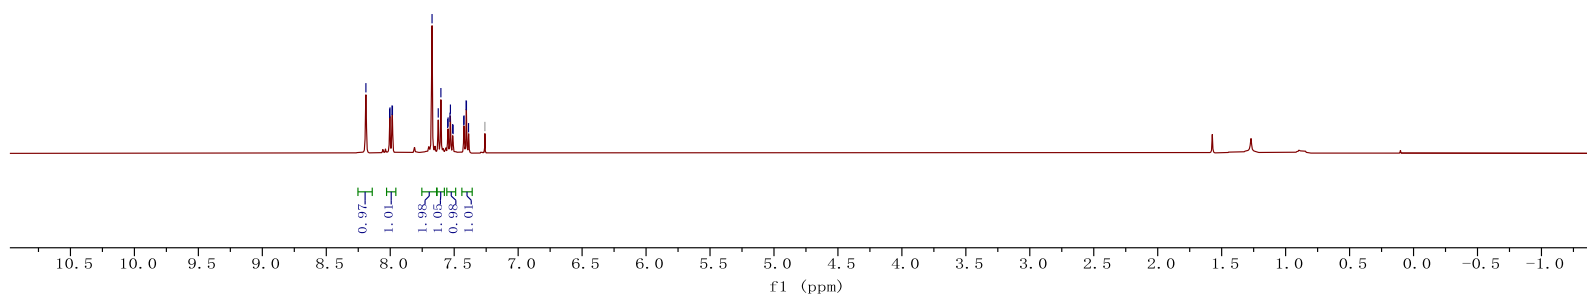

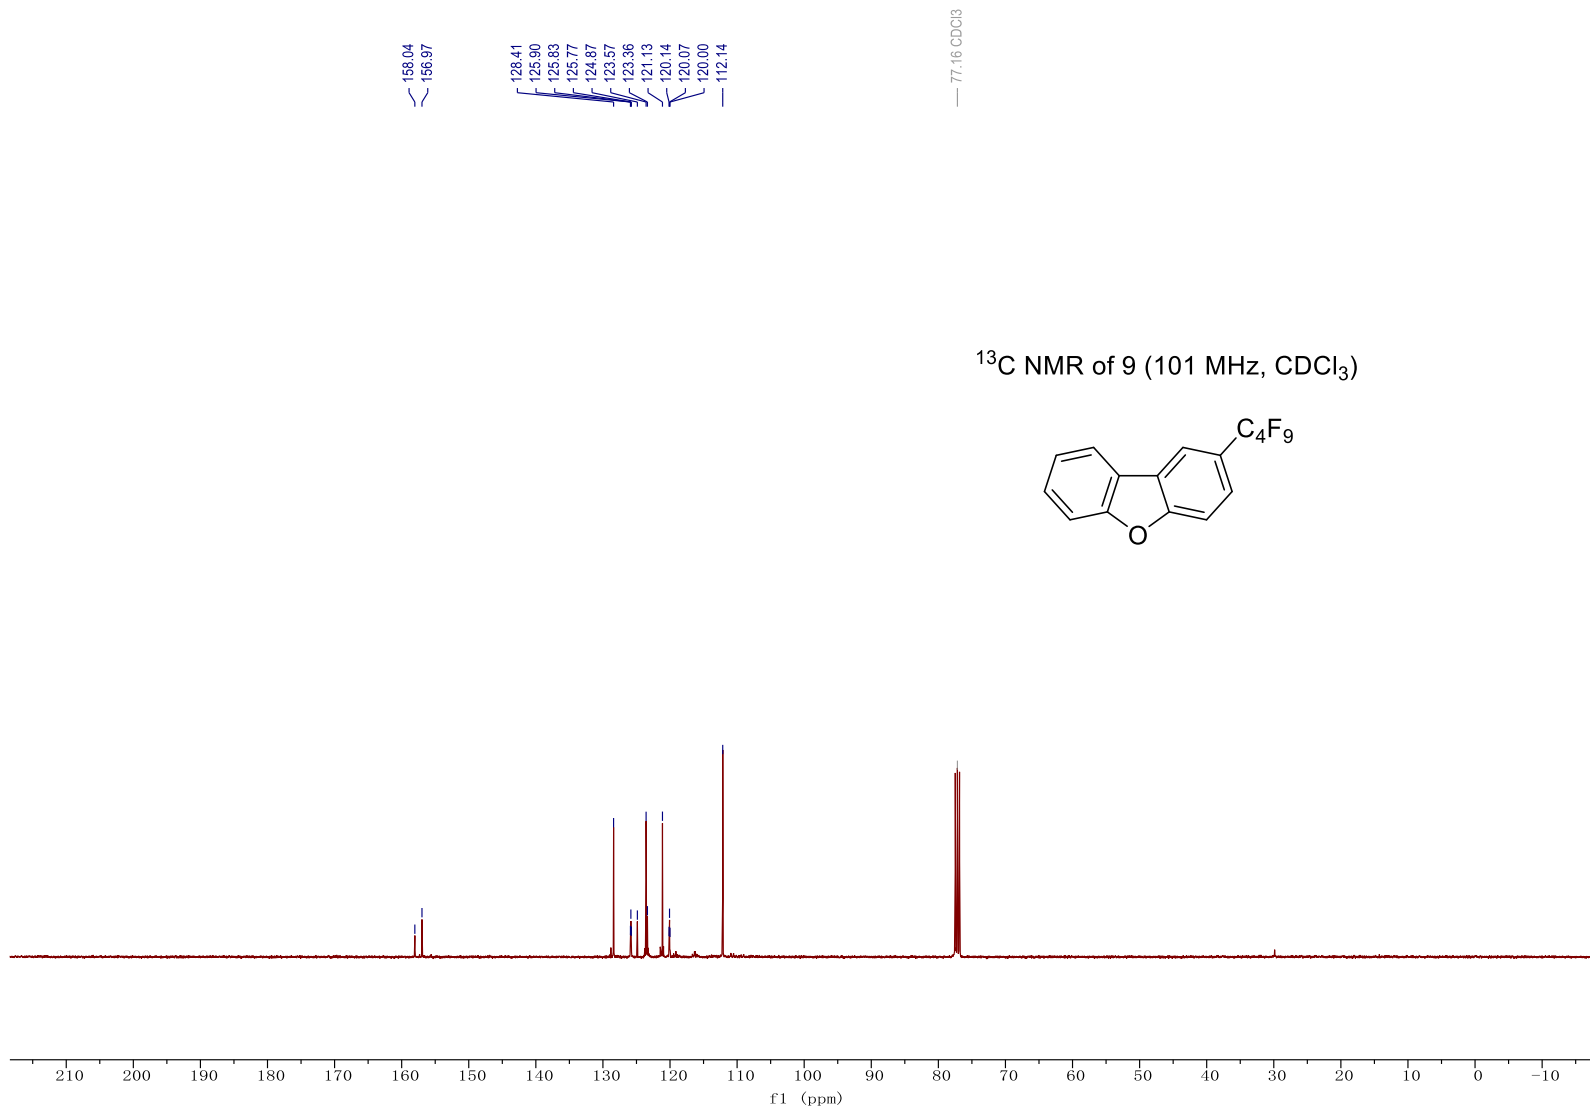

-80.99  
-81.01  
-81.04

-109.09  
-109.12  
-109.16  
-122.40  
-122.43  
-122.46  
-122.48  
-125.51  
-125.56  
-125.59

$^{19}\text{F}$  NMR of 9 (376 MHz,  $\text{CDCl}_3$ )

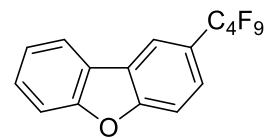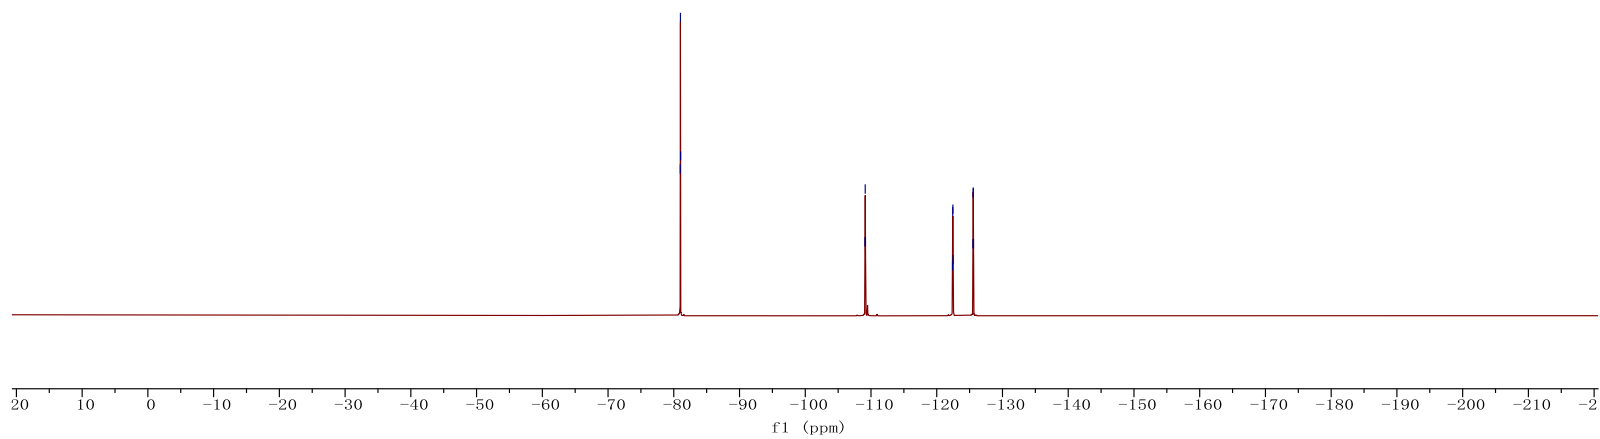

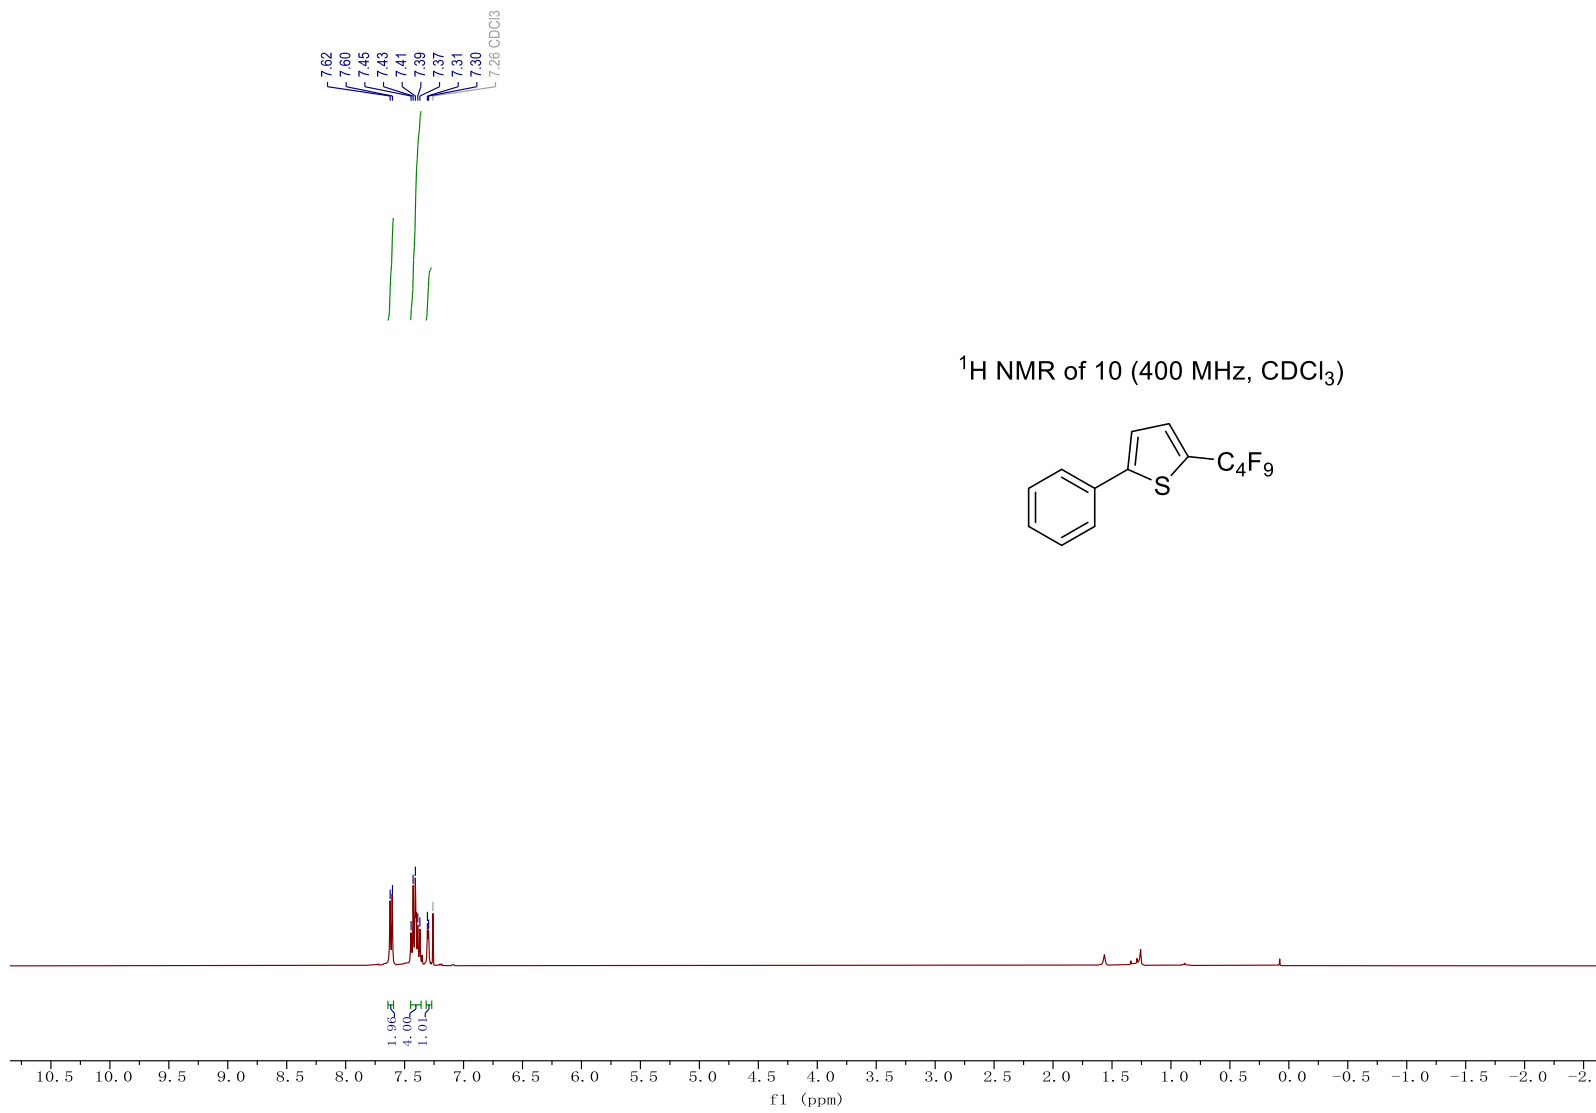

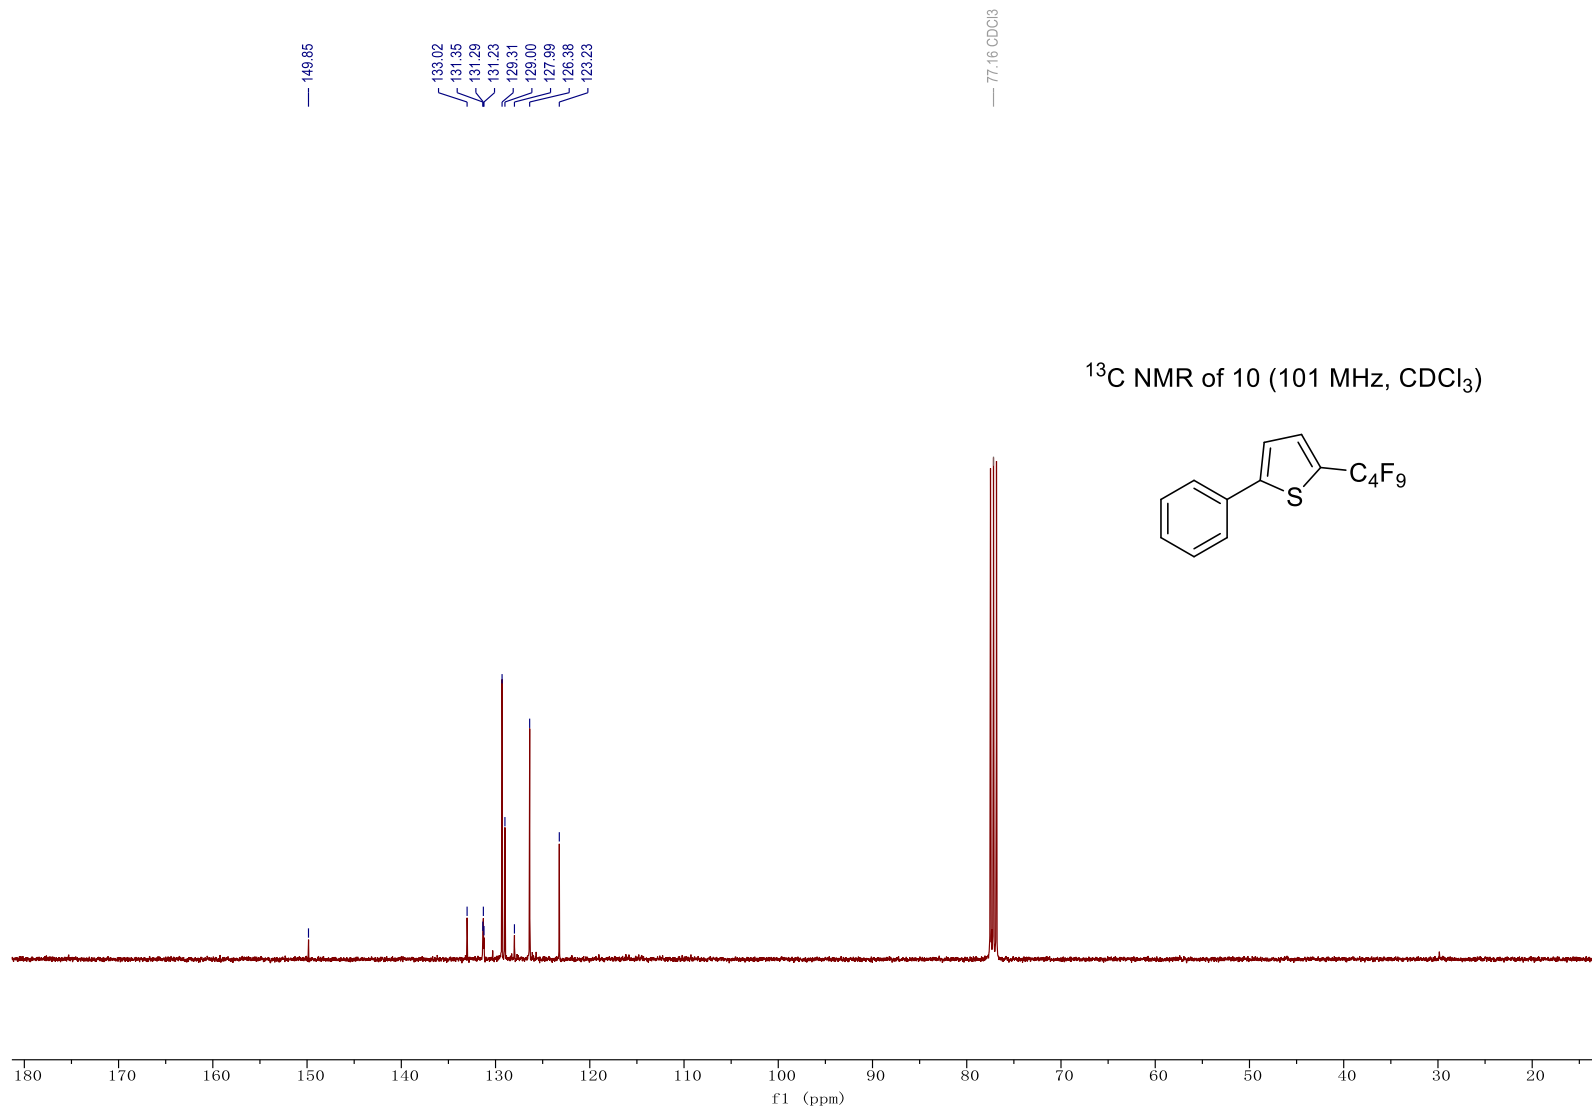

-80.96  
-80.99  
-81.02

-101.49  
-101.53  
-101.57

-122.42  
-122.45  
-122.47  
-122.50  
-125.52  
-125.54  
-125.57  
-125.58  
-125.61

<sup>19</sup>F NMR of 10 (376 MHz, CDCl<sub>3</sub>)

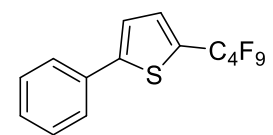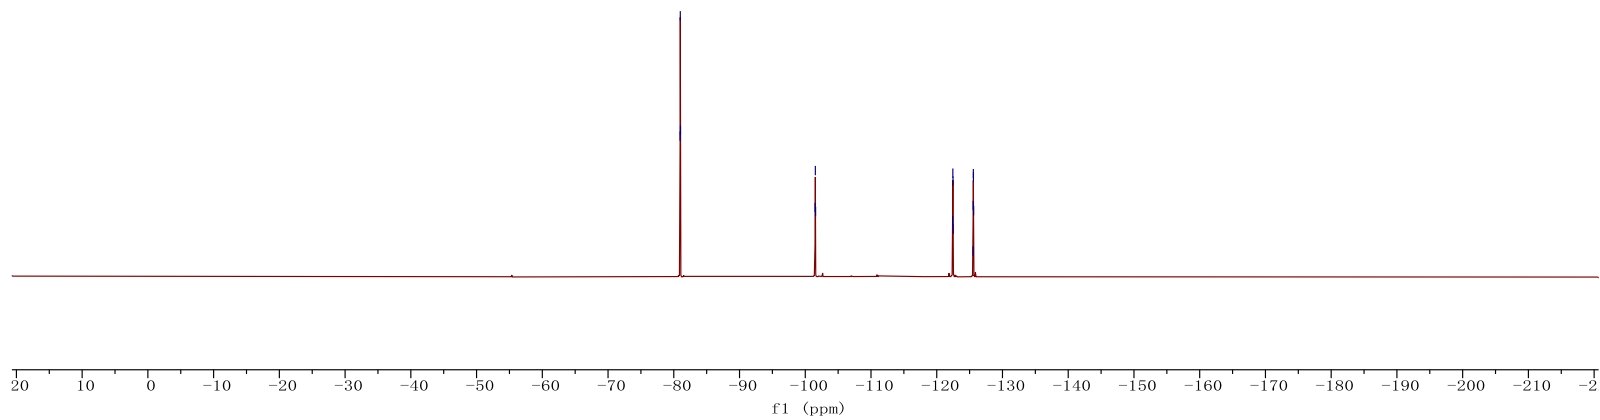

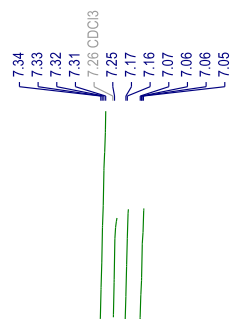

<sup>1</sup>H NMR of 11 (400 MHz, CDCl<sub>3</sub>)

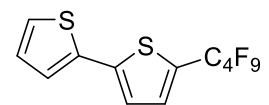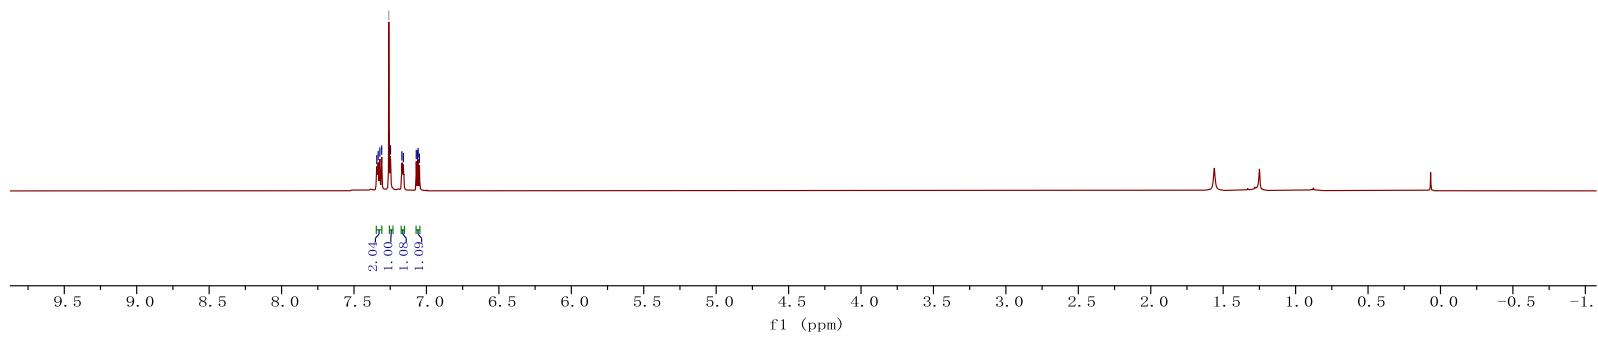

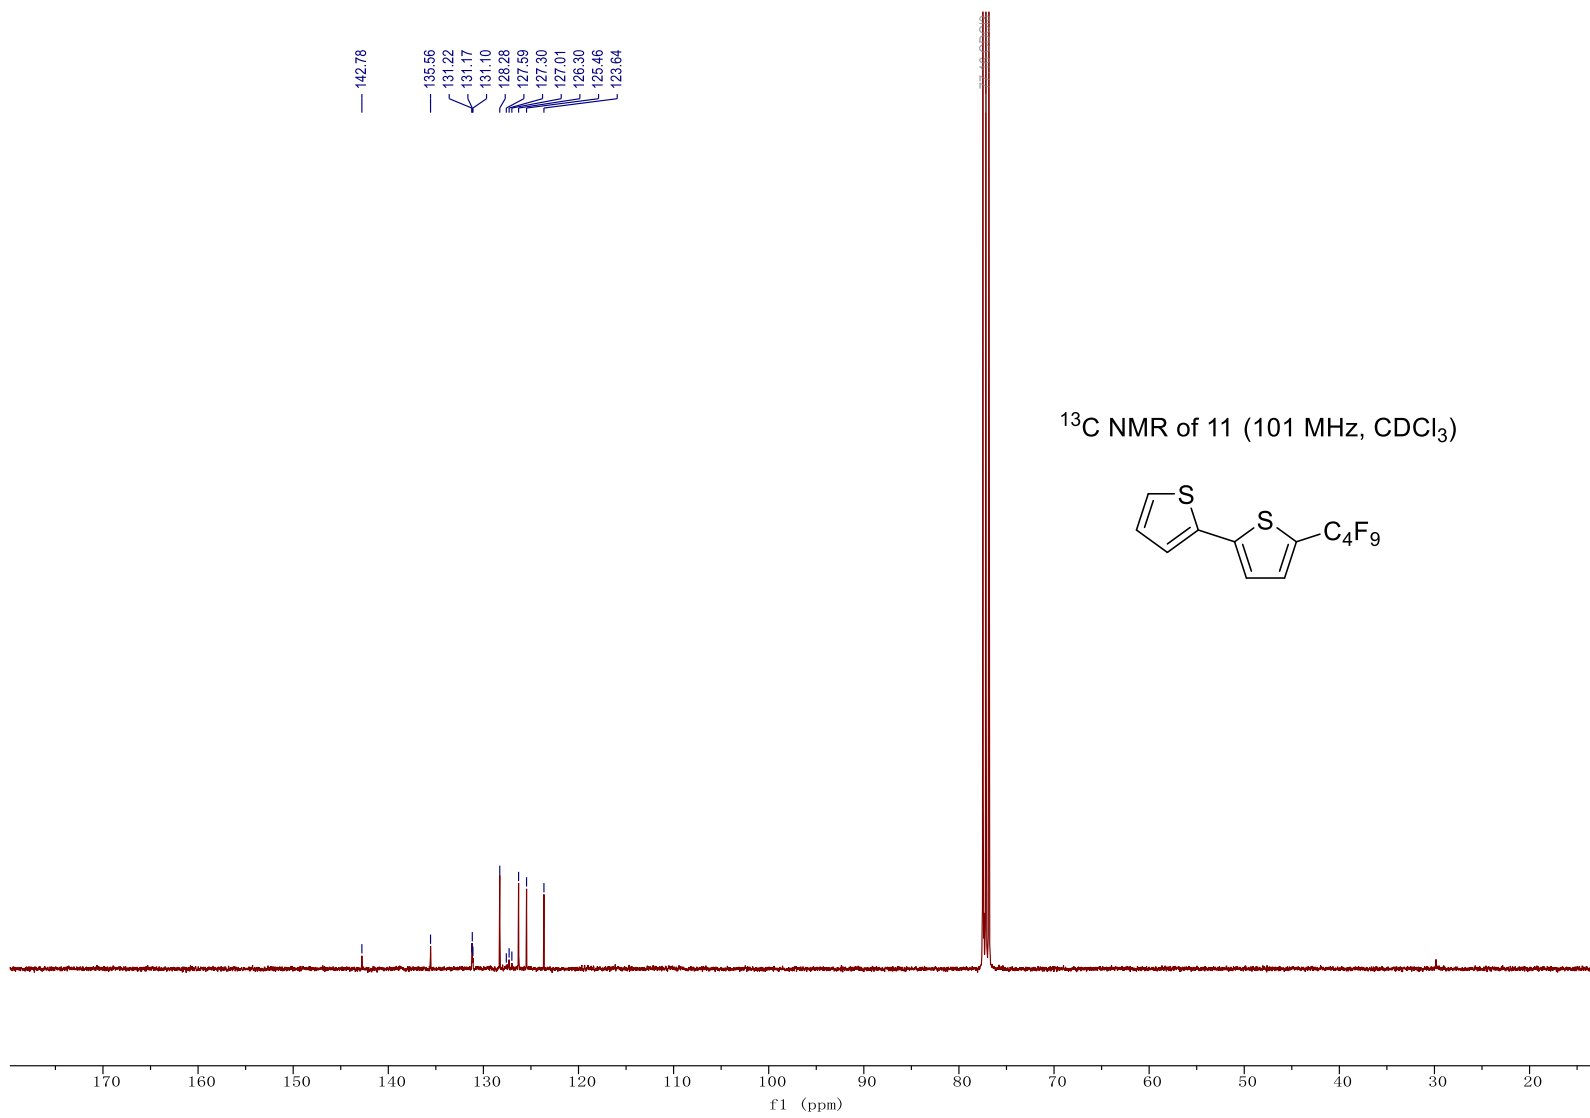

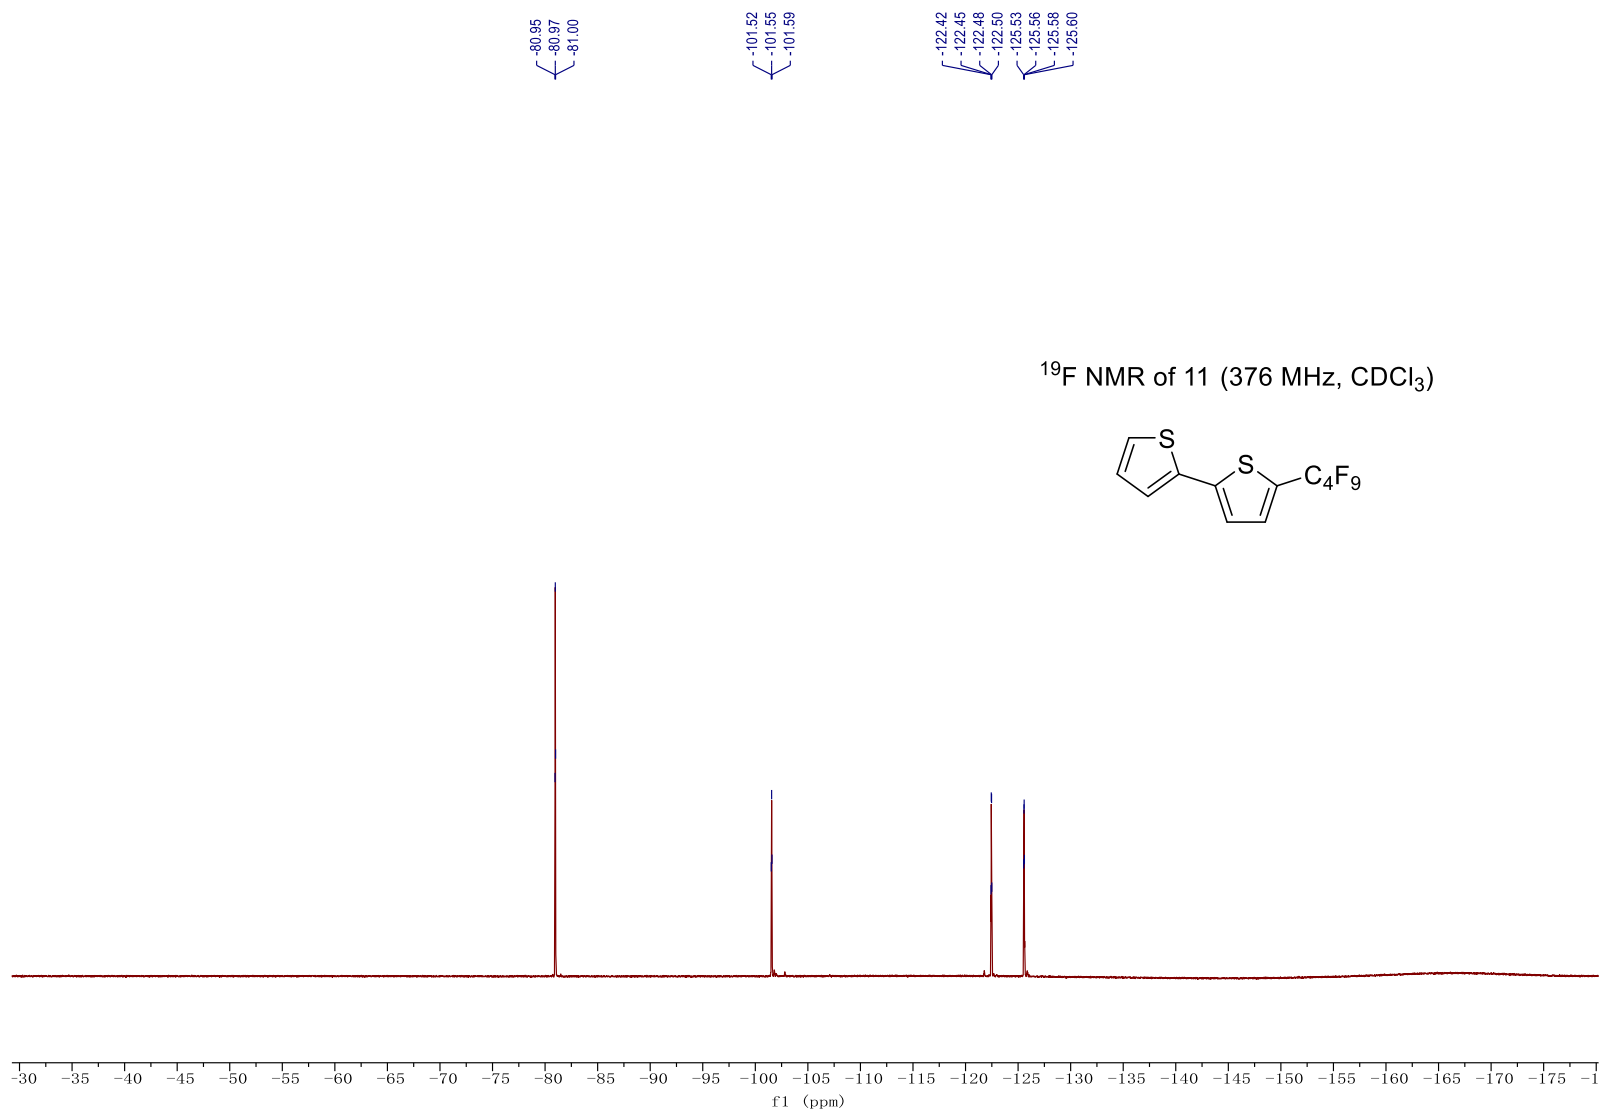

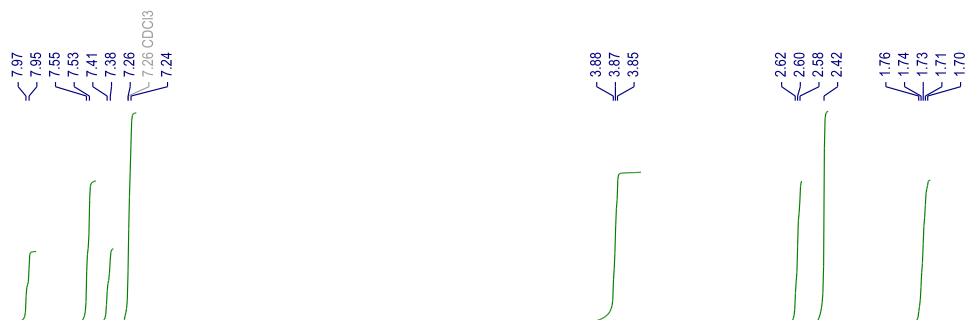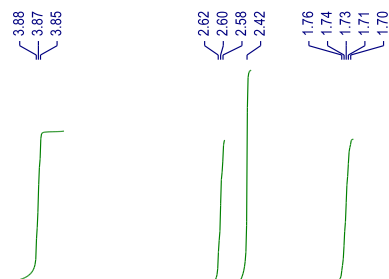

<sup>1</sup>H NMR of 12 (400 MHz, CDCl<sub>3</sub>)

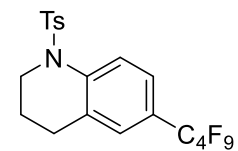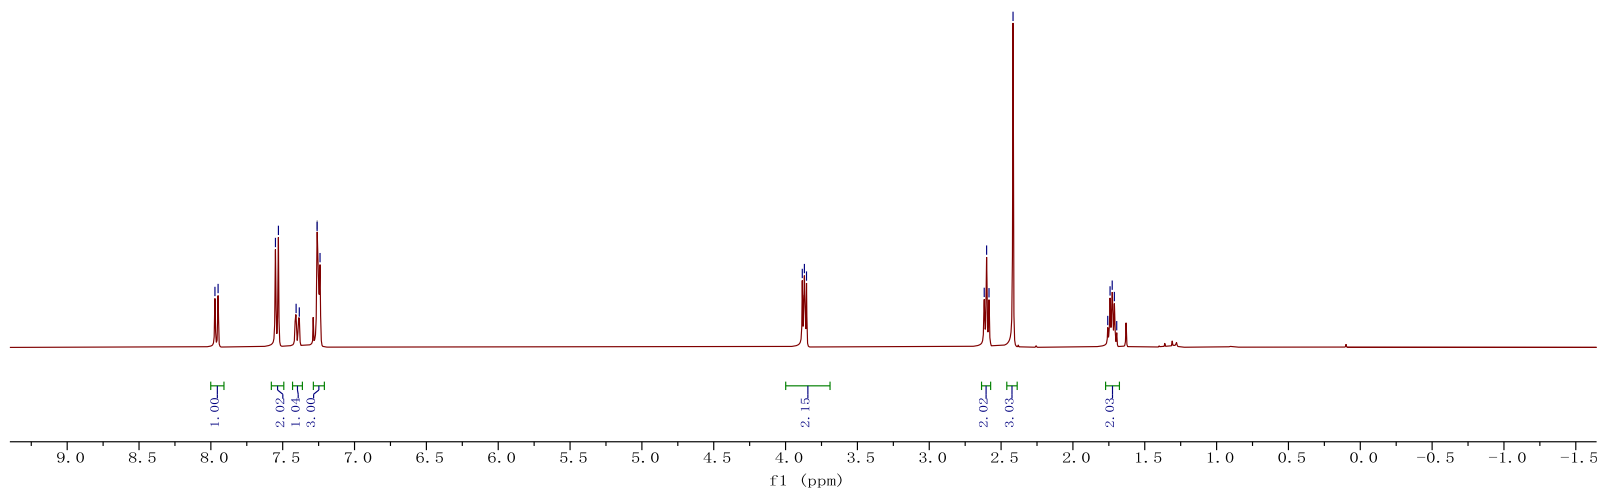

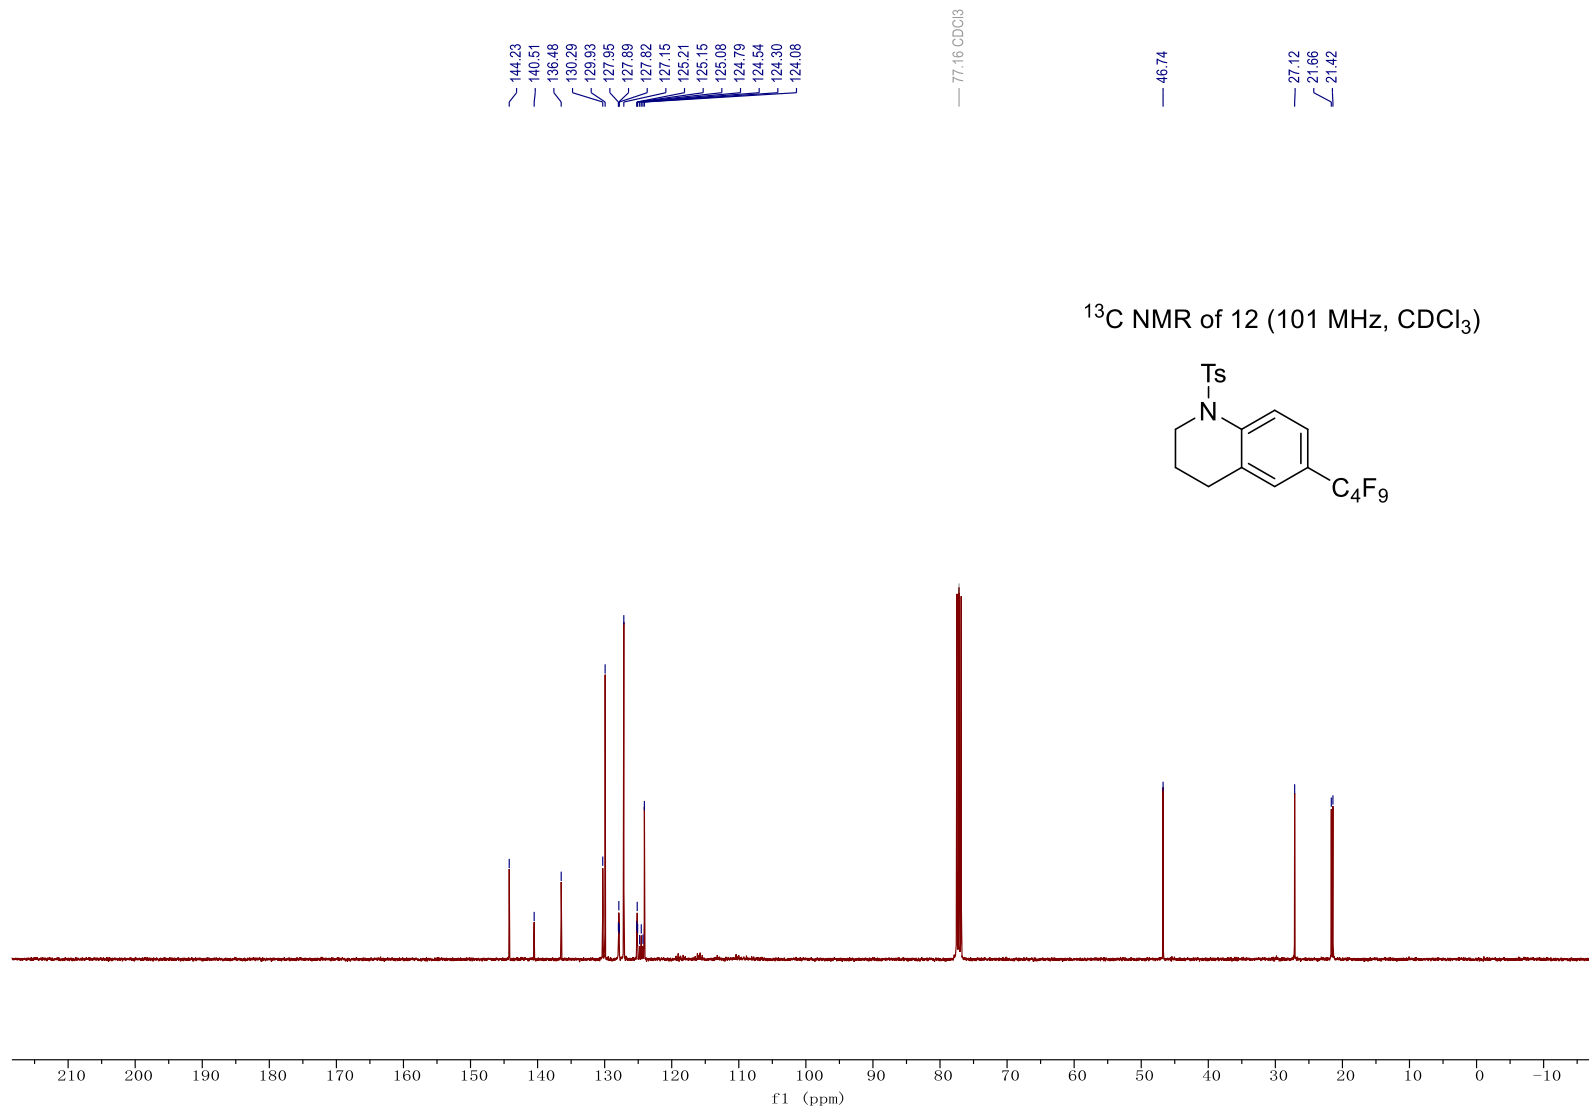

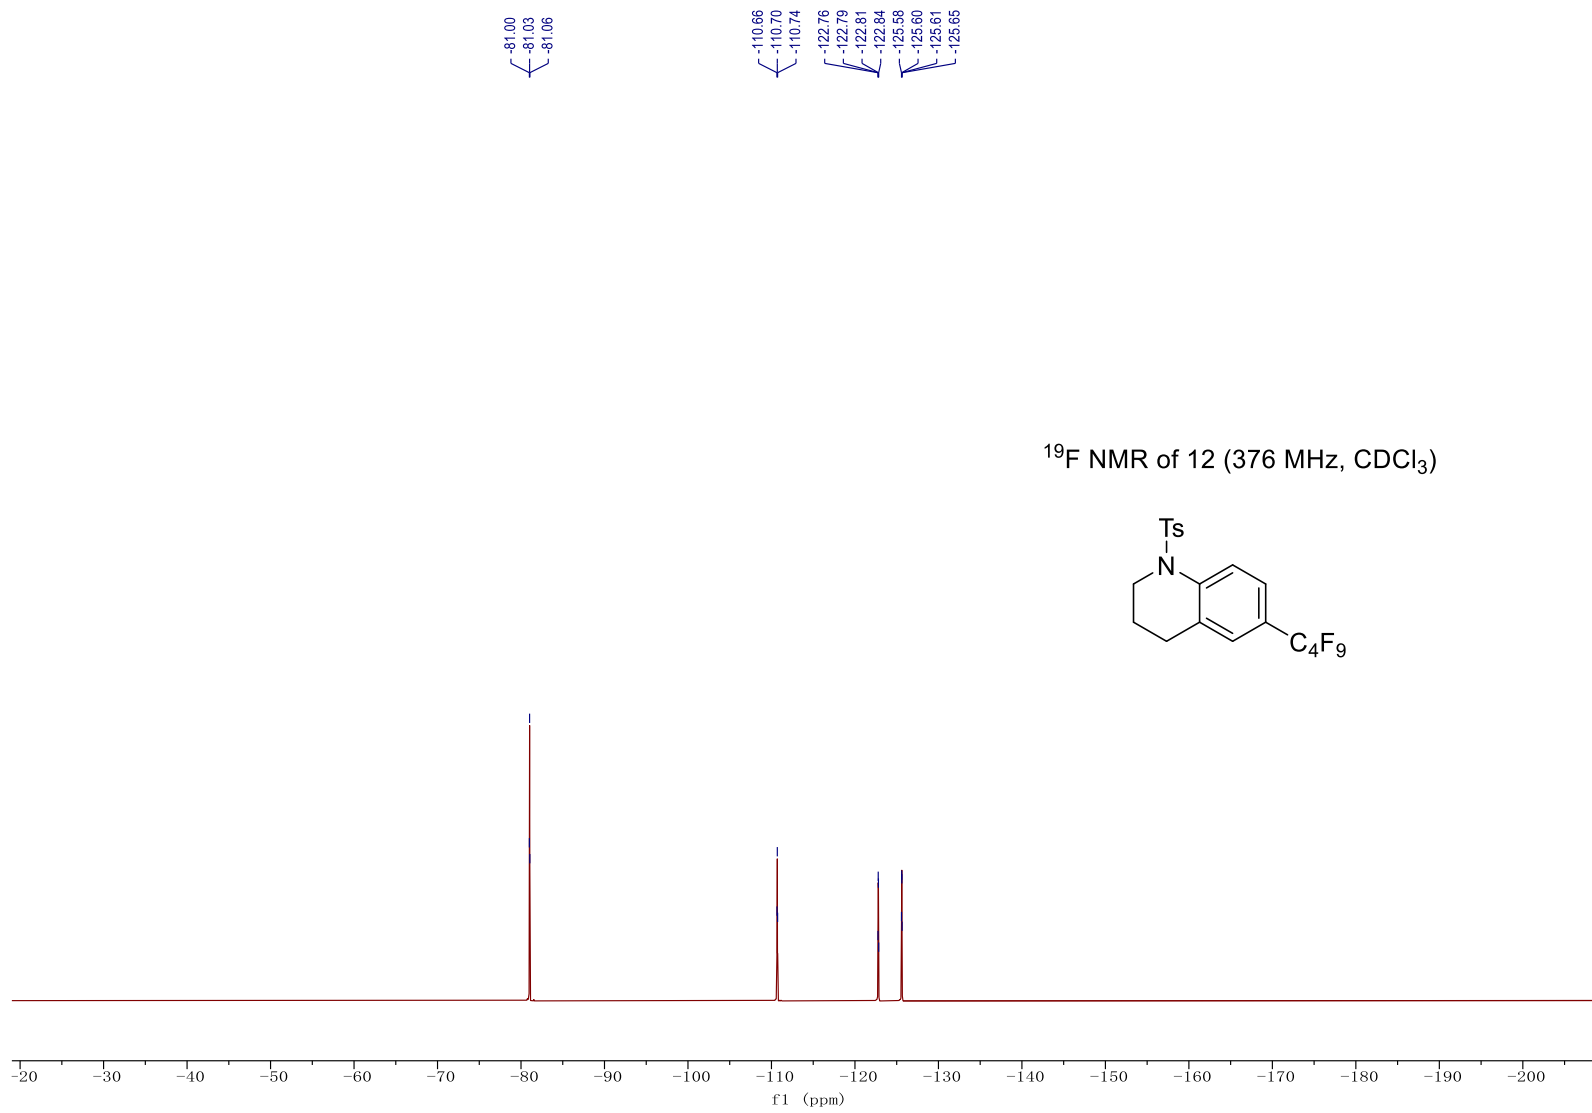

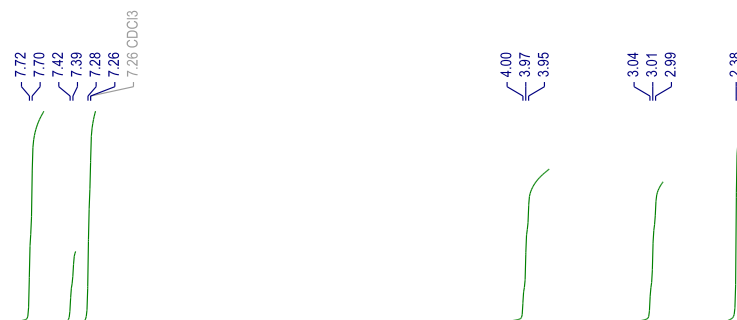

$^1\text{H}$  NMR of 13 (400 MHz,  $\text{CDCl}_3$ )

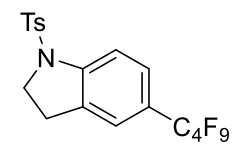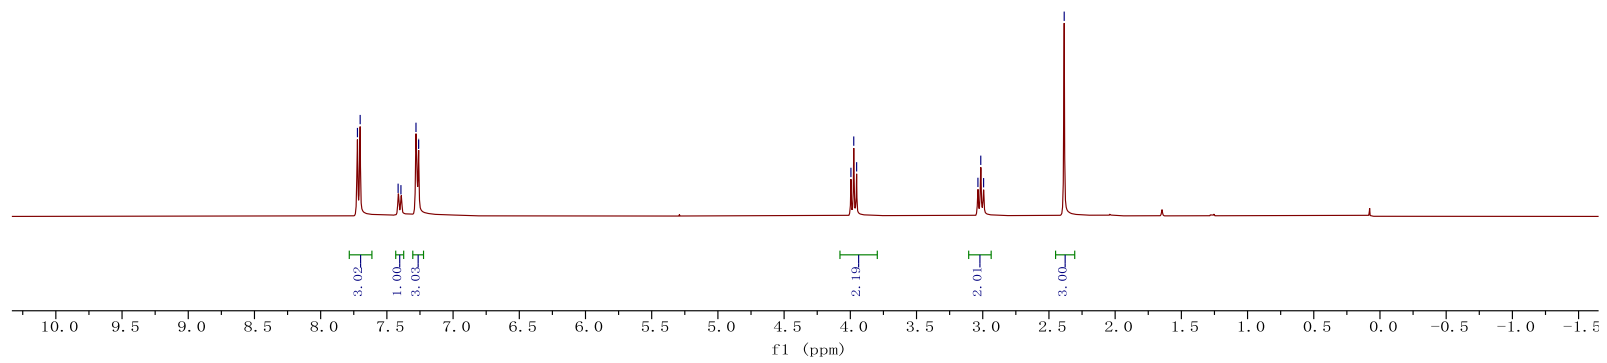

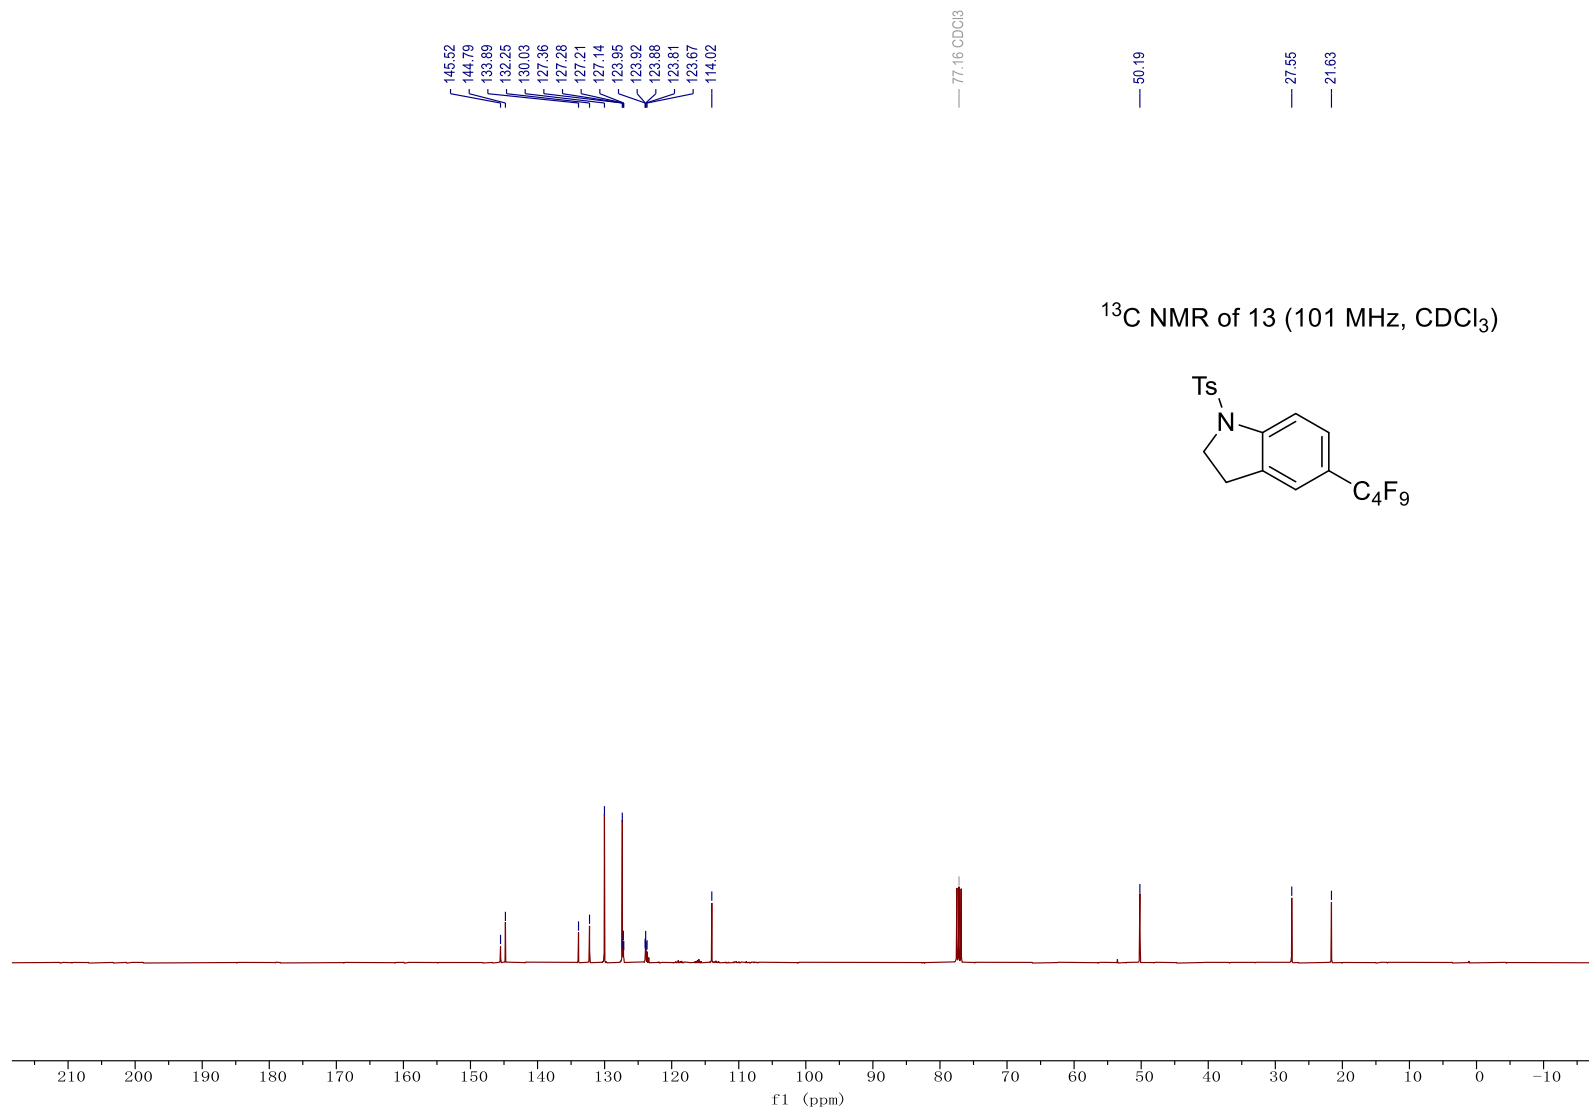

-81.05  
-81.07  
-81.10

-109.99  
-110.03  
-110.06  
-122.71  
-122.74  
-122.76  
-122.79  
-125.65  
-125.69  
-125.72  
-125.74

$^{19}\text{F}$  NMR of 13 (376 MHz,  $\text{CDCl}_3$ )

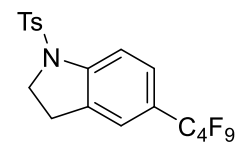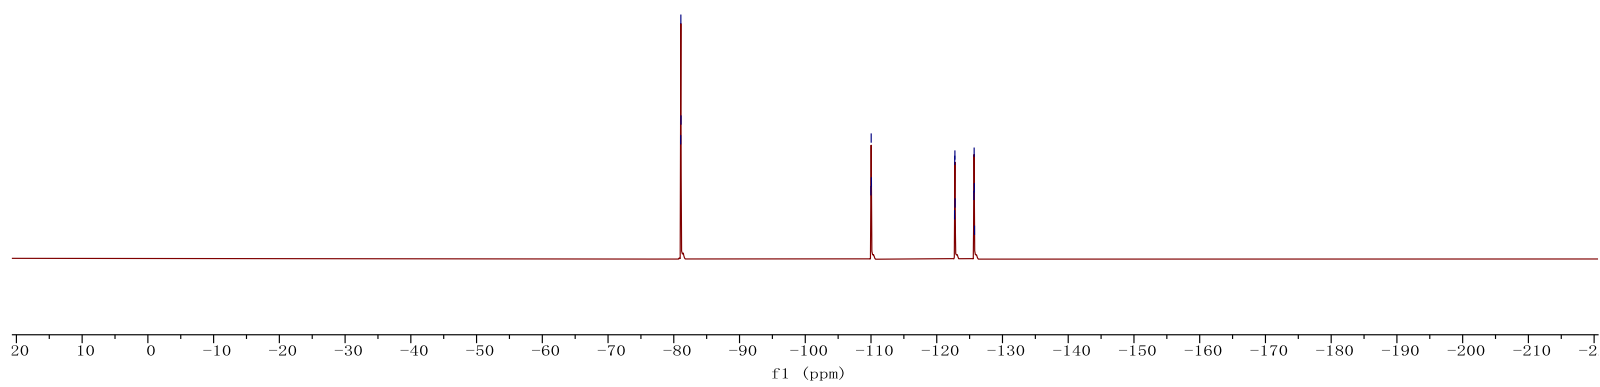

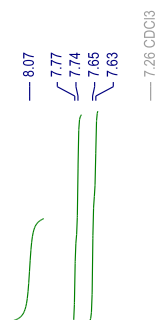

<sup>1</sup>H NMR of 14 (400 MHz, CDCl<sub>3</sub>)

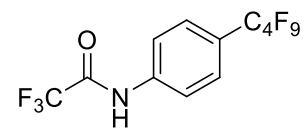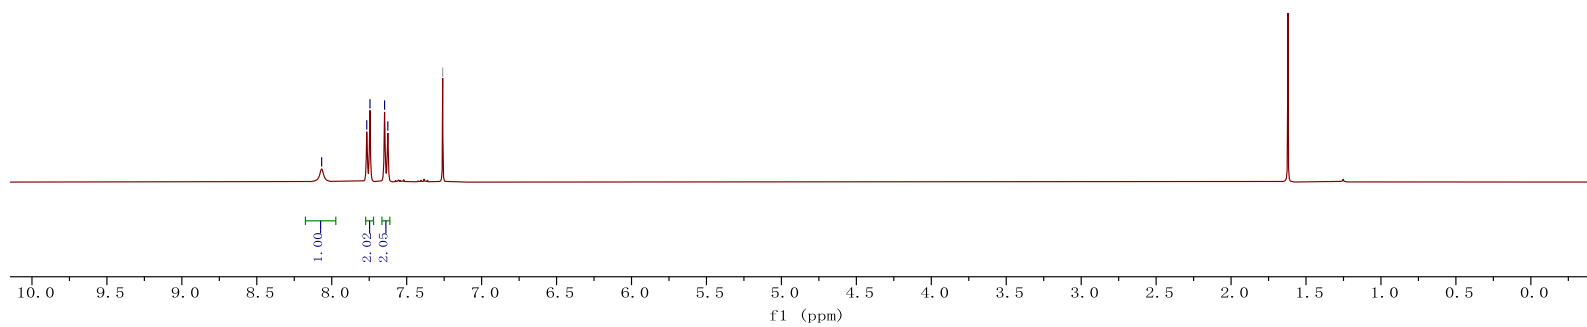

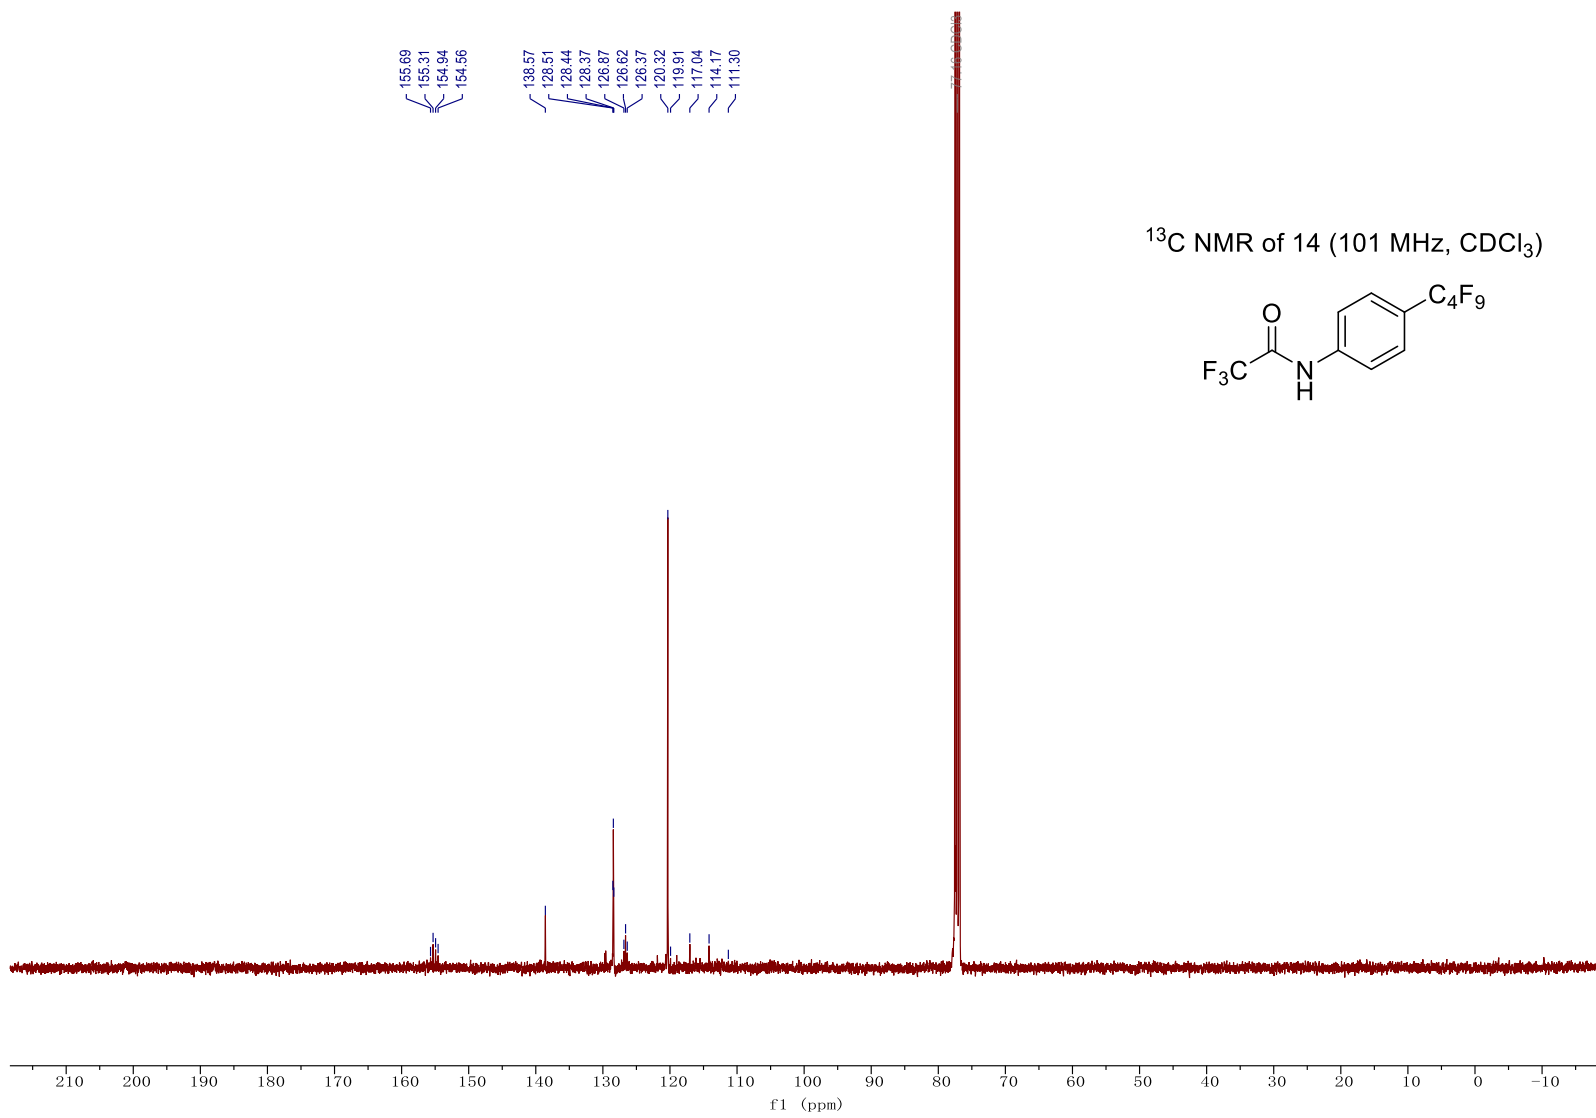

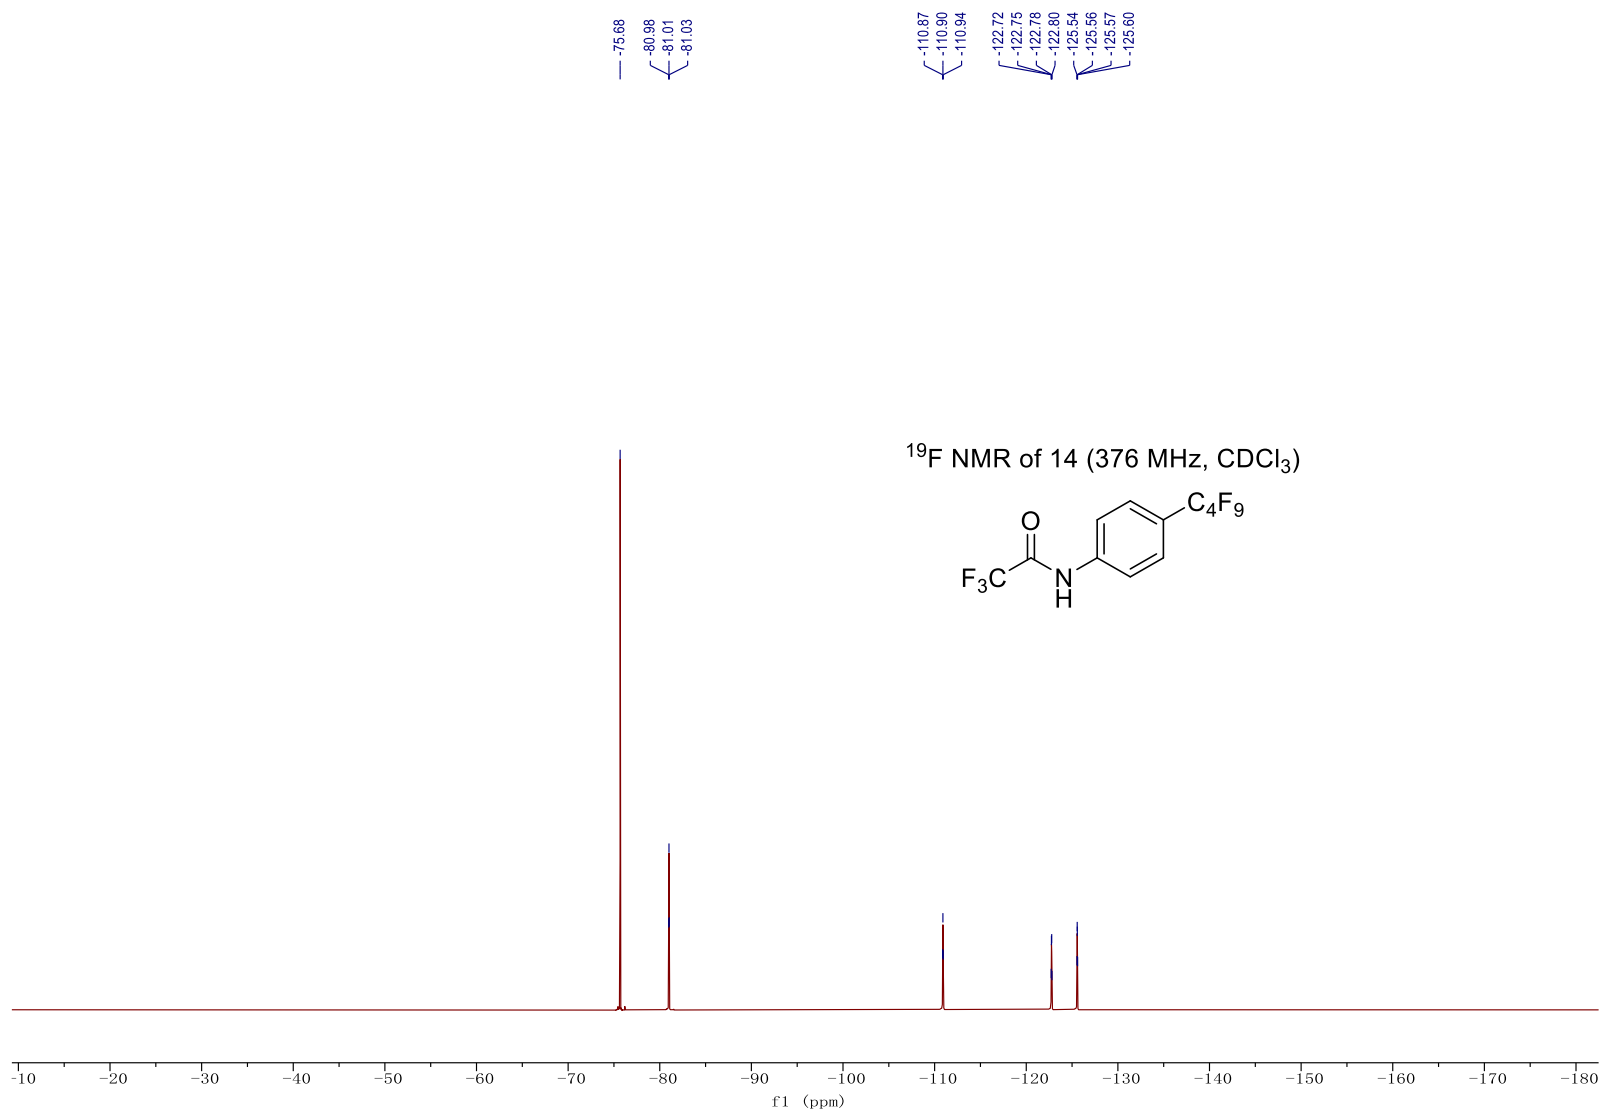

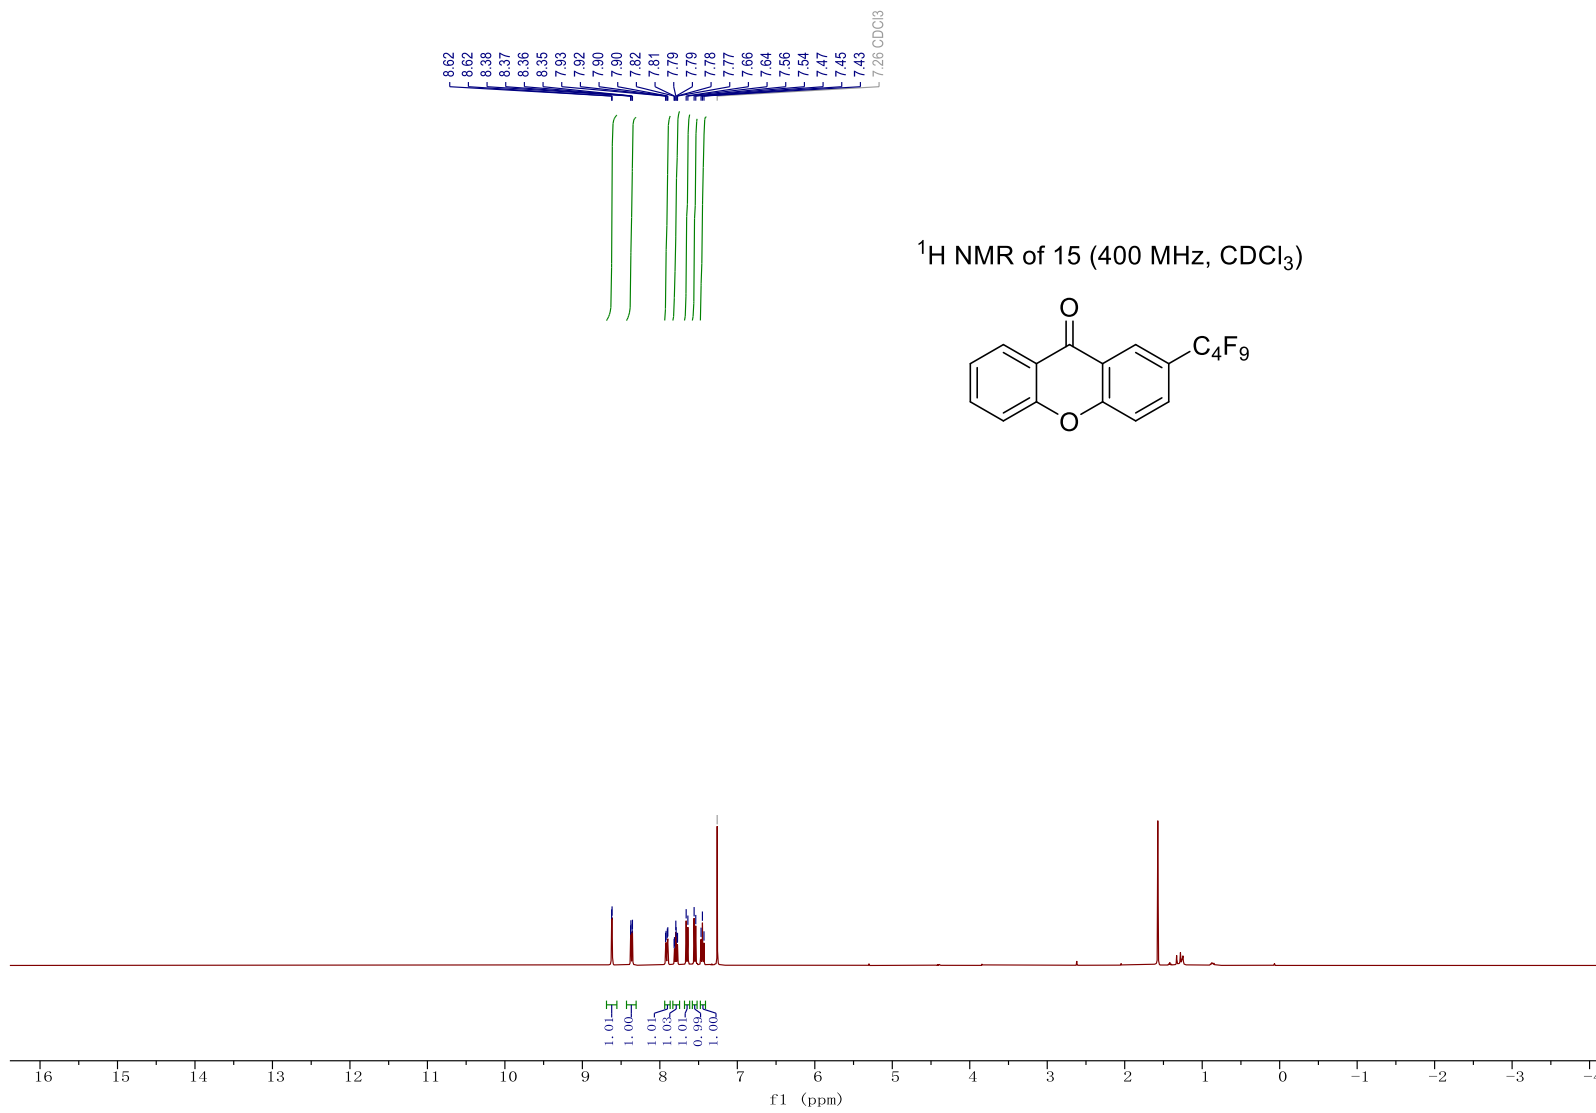

<sup>1</sup>H NMR of 15 (400 MHz, CDCl<sub>3</sub>)

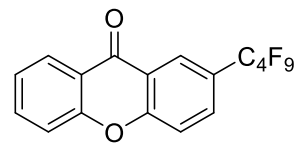

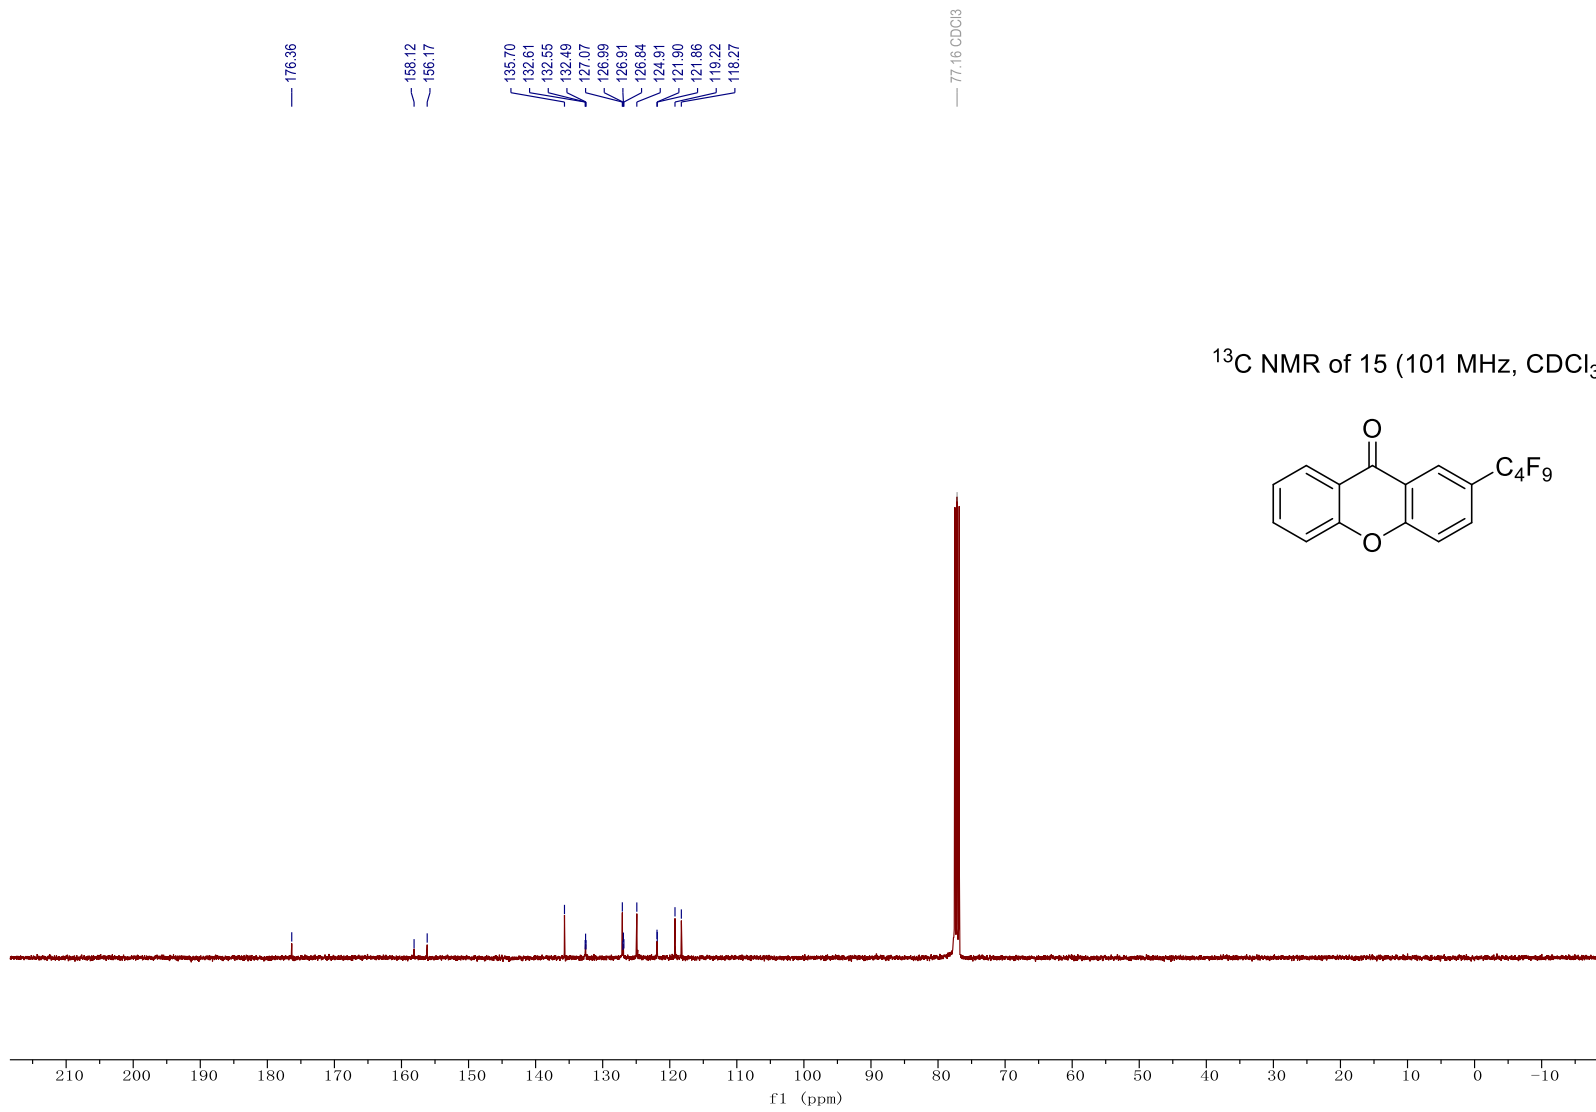

-80.92  
-80.95  
-80.98

-110.25  
-110.29  
-110.32  
-122.40  
-122.43  
-122.45  
-122.48  
-125.45  
-125.48  
-125.49  
-125.52

$^{19}\text{F}$  NMR of 15 (376 MHz,  $\text{CDCl}_3$ )

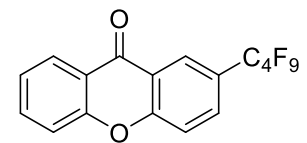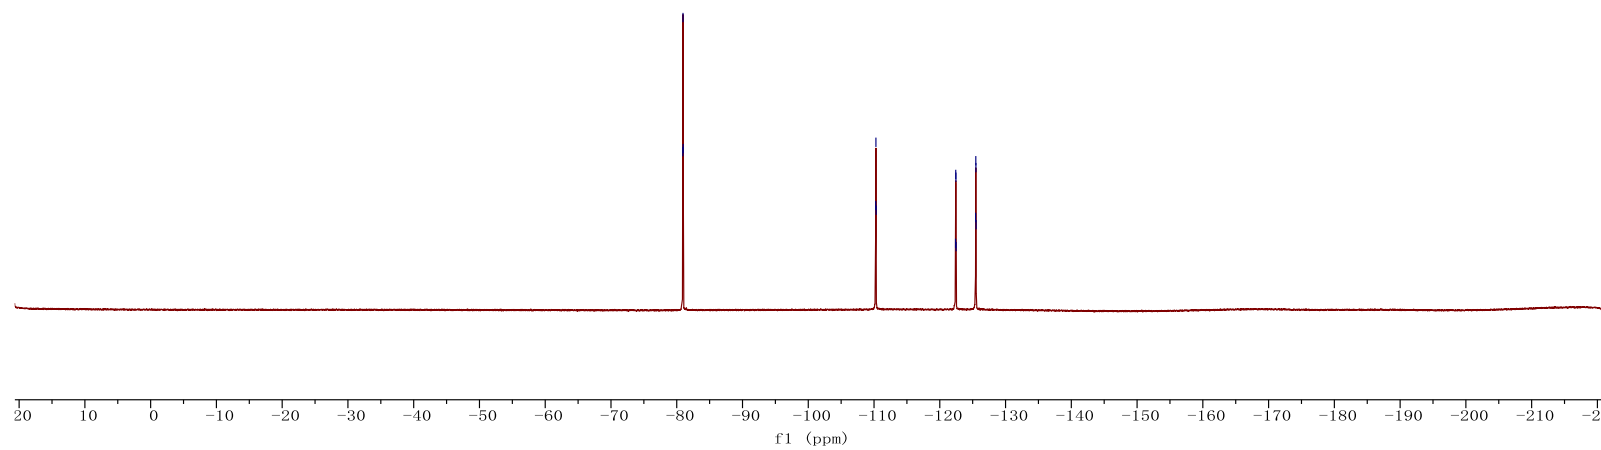

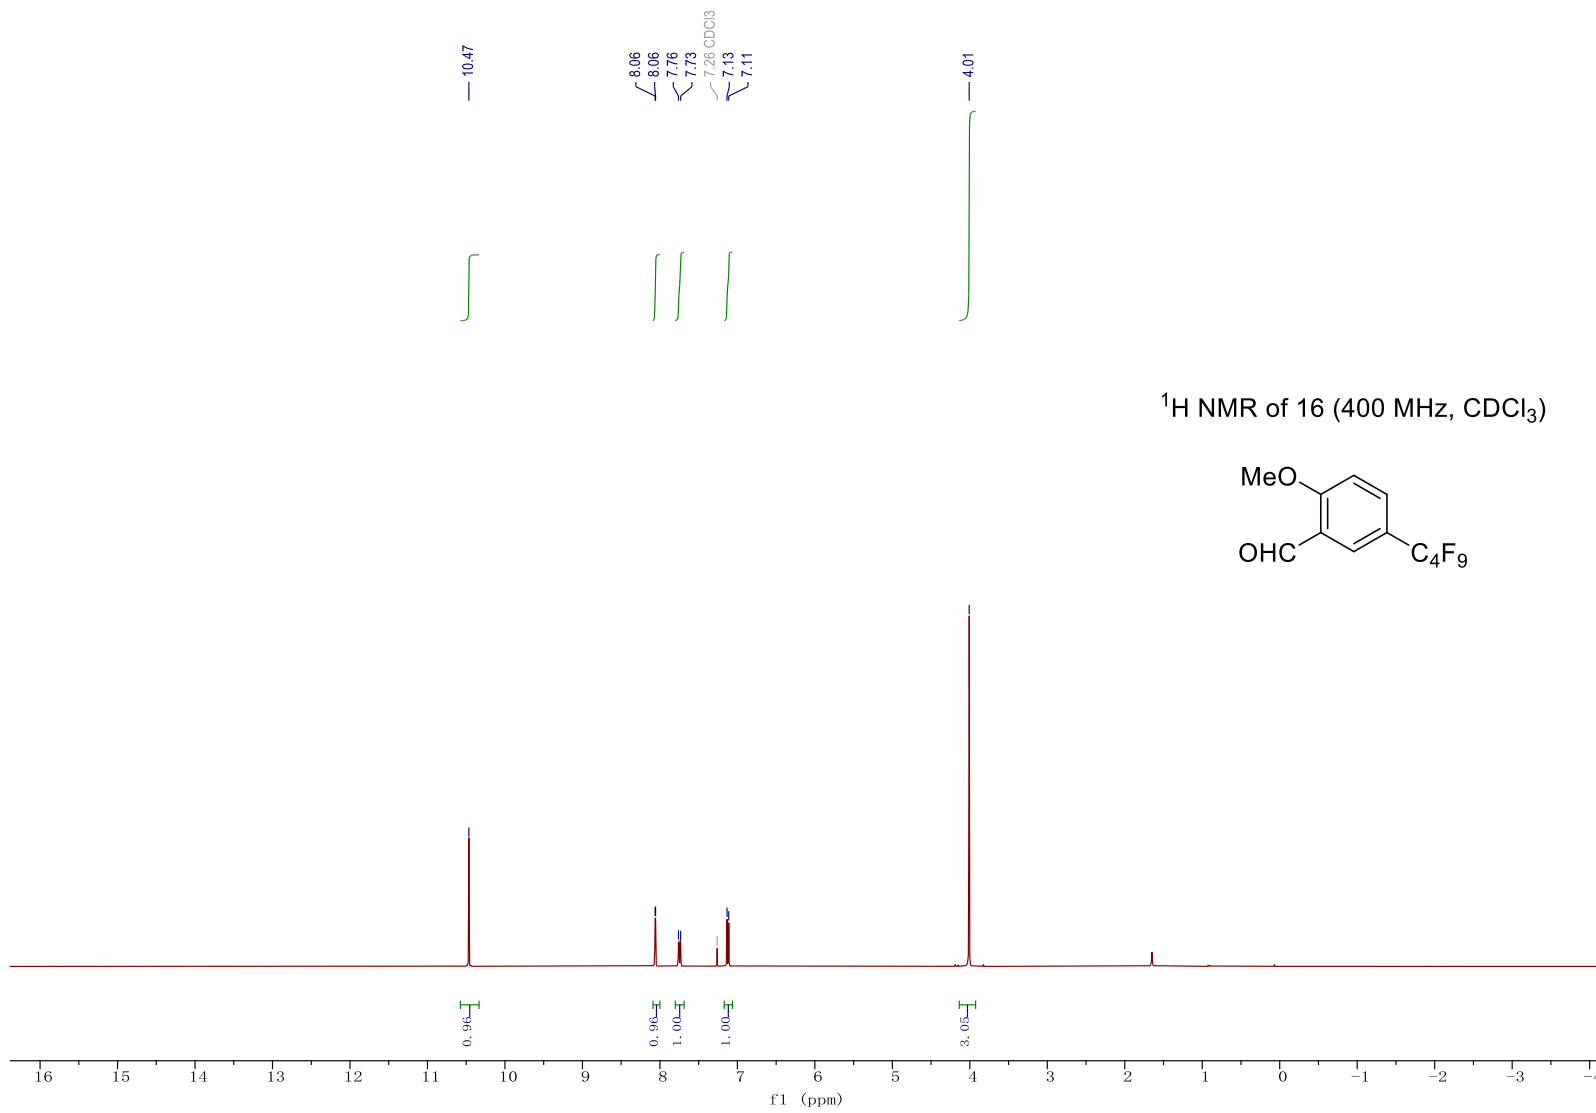

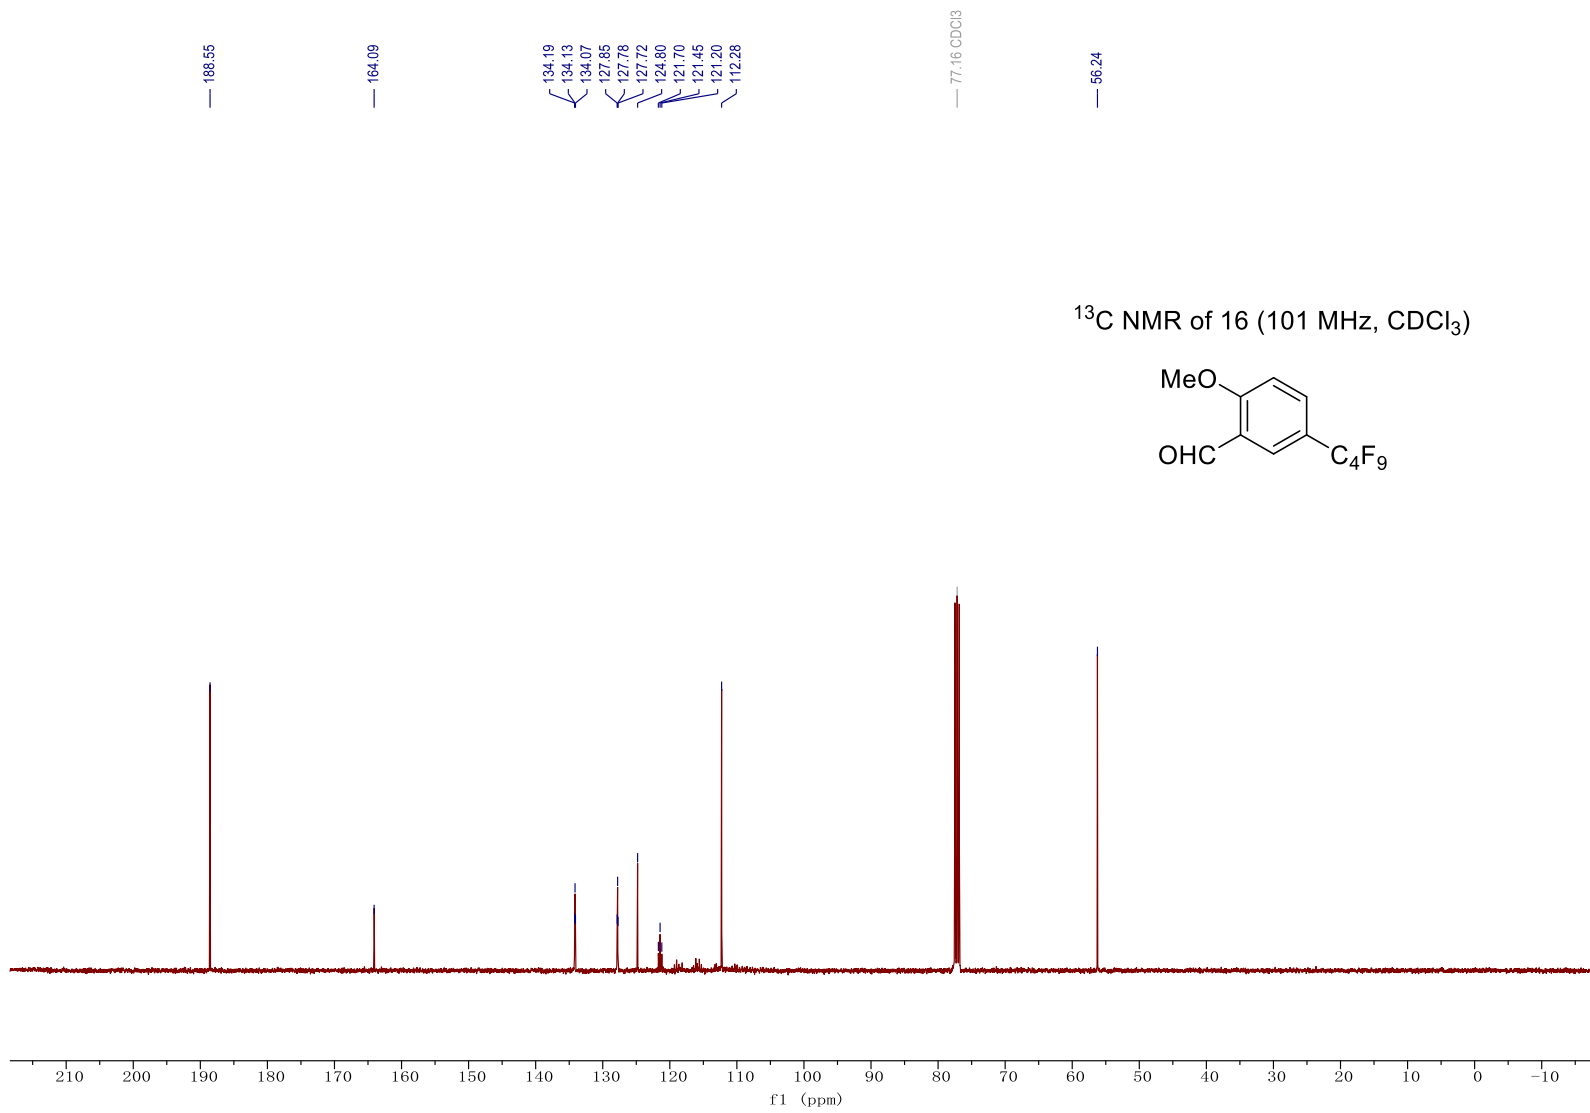

-81.06  
-81.09  
-81.13  
-81.16

-110.43  
-110.47  
-110.51

-122.73  
-122.76  
-122.79

-125.55  
-125.57  
-125.63  
-125.66  
-125.69

$^{19}\text{F}$  NMR of 16 (376 MHz,  $\text{CDCl}_3$ )

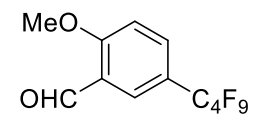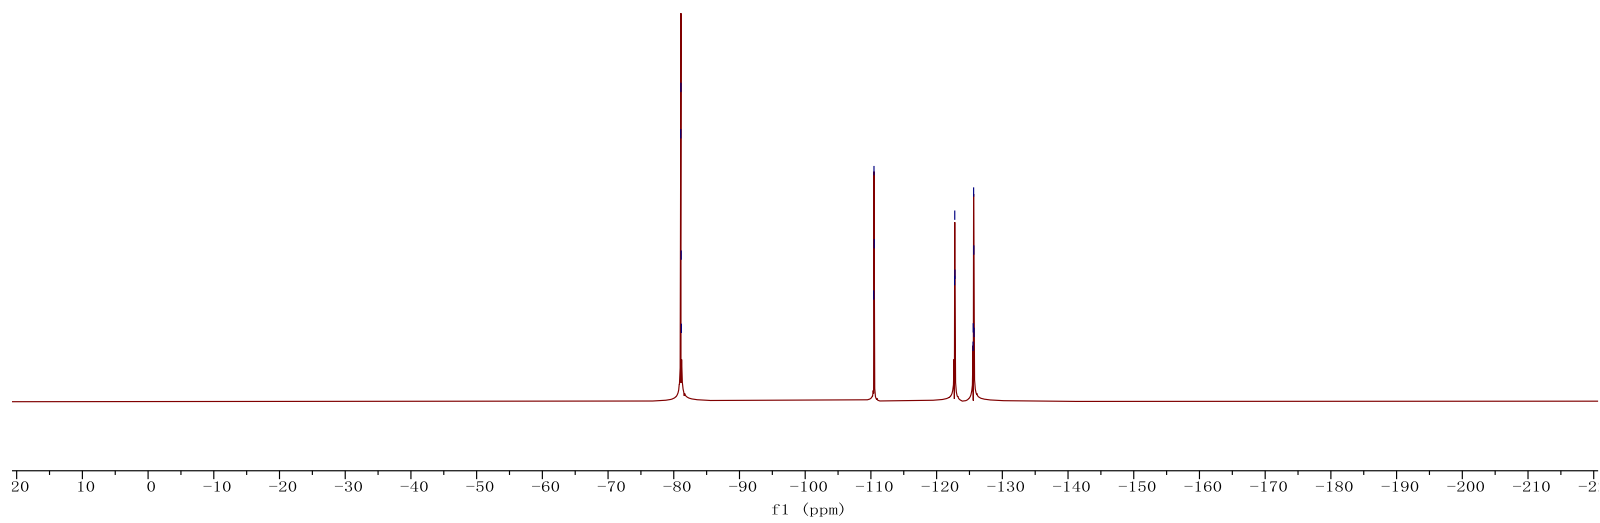

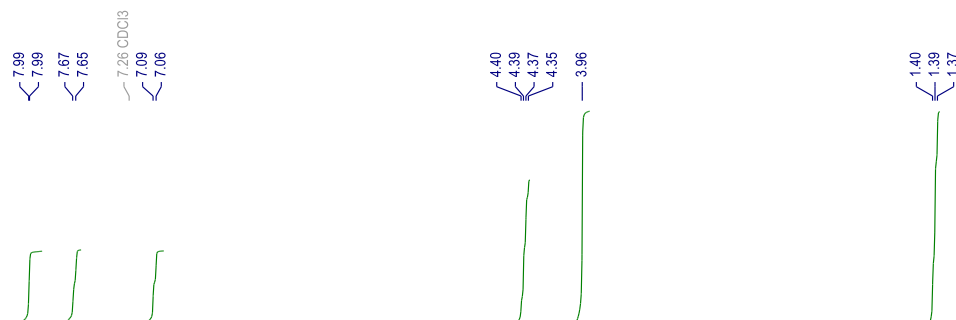

<sup>1</sup>H NMR of 17 (400 MHz, CDCl<sub>3</sub>)

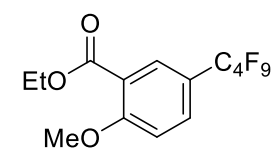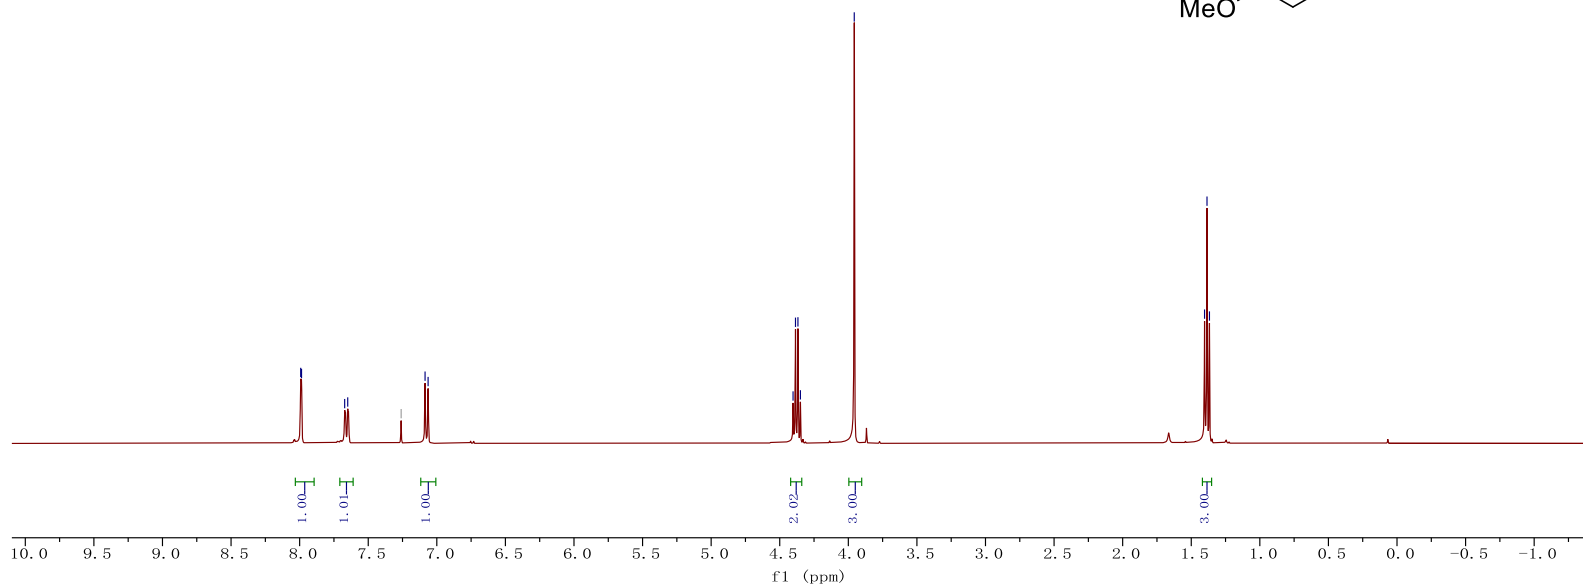

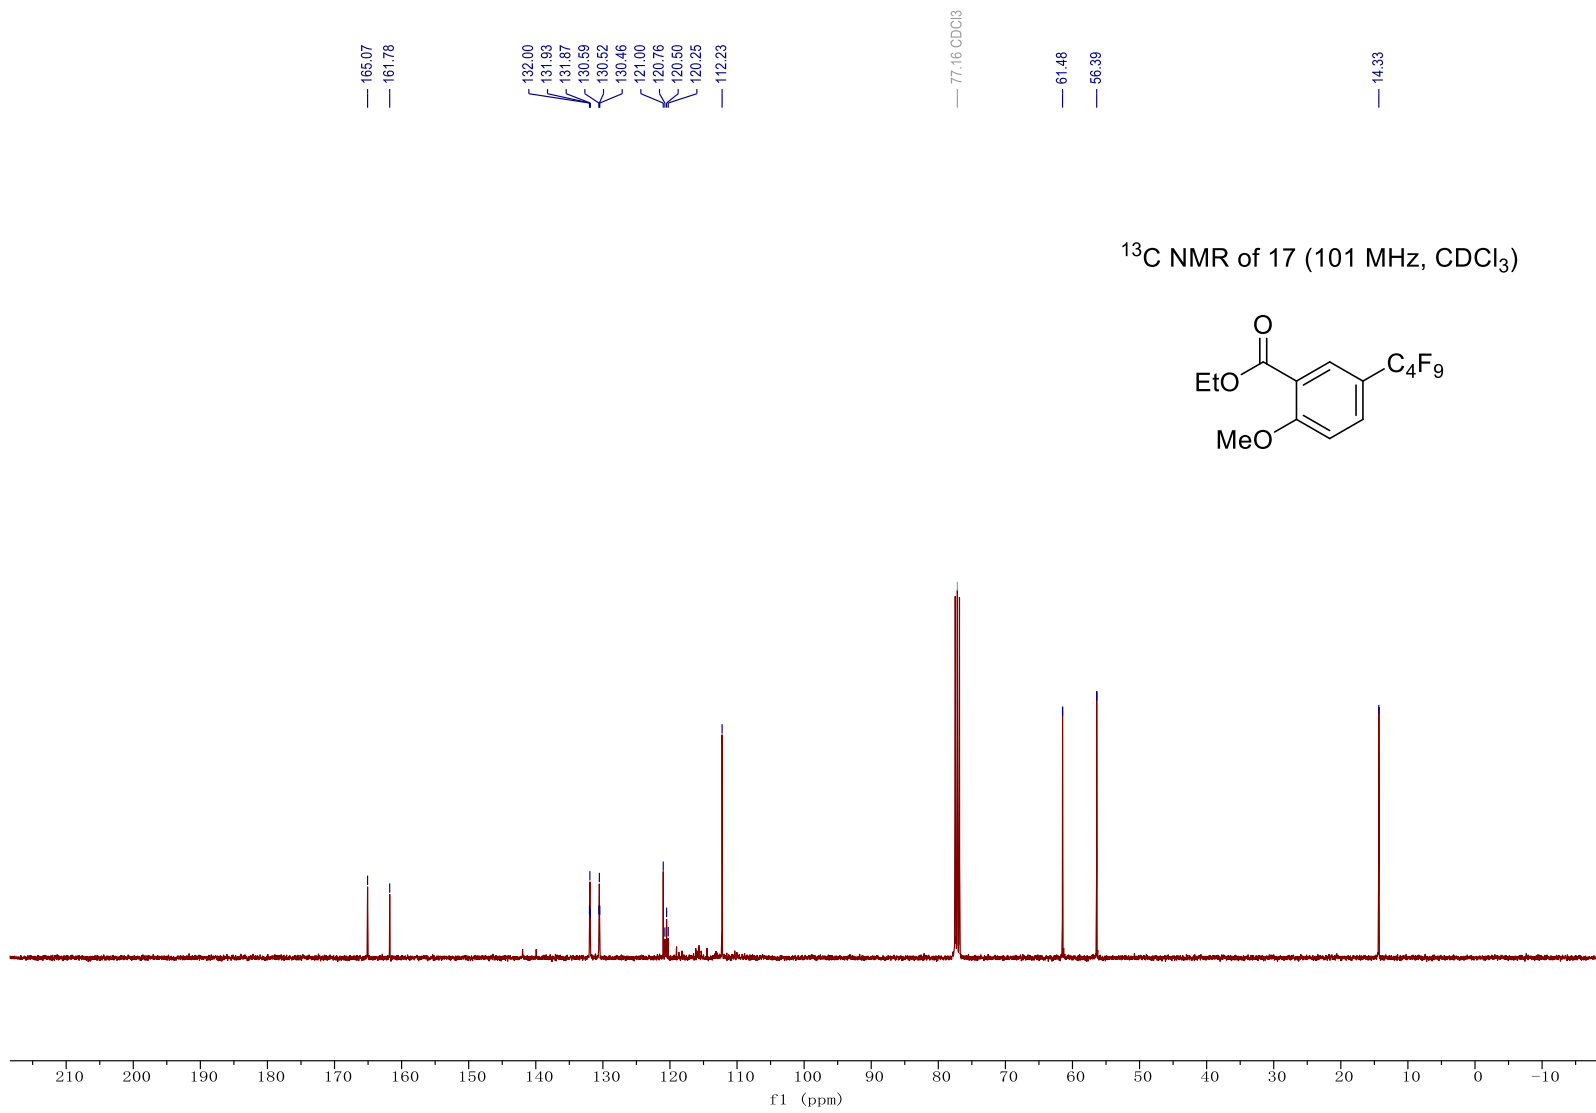

-81.05  
-81.08  
-81.11

-110.30  
-110.34  
-110.38

-122.68  
-122.70  
-122.73  
-122.76  
-125.60  
-125.63  
-125.64  
-125.67

$^{19}\text{F}$  NMR of 17 (376 MHz,  $\text{CDCl}_3$ )

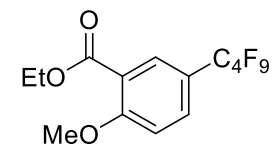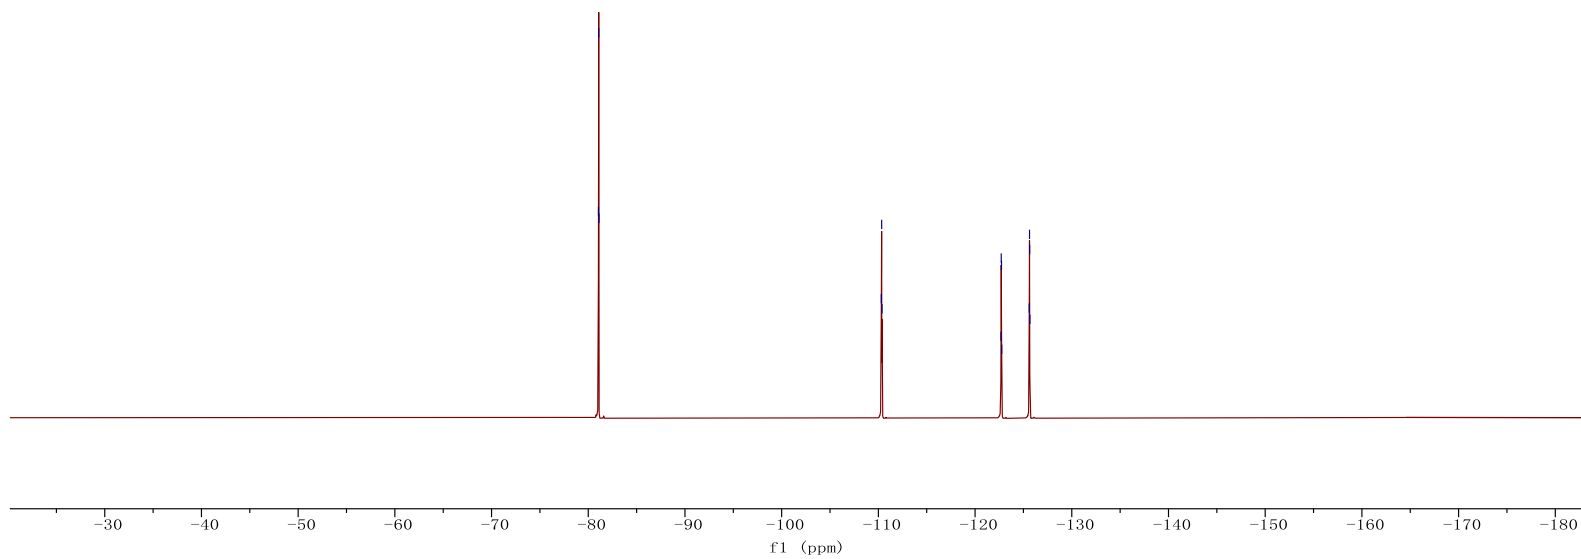

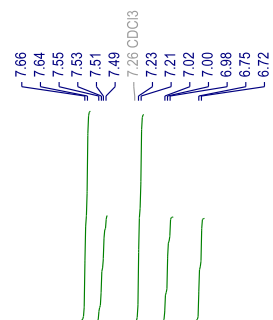

<sup>1</sup>H NMR of 18 (400 MHz, CDCl<sub>3</sub>)

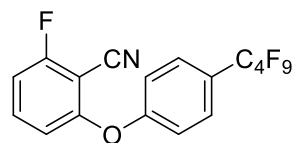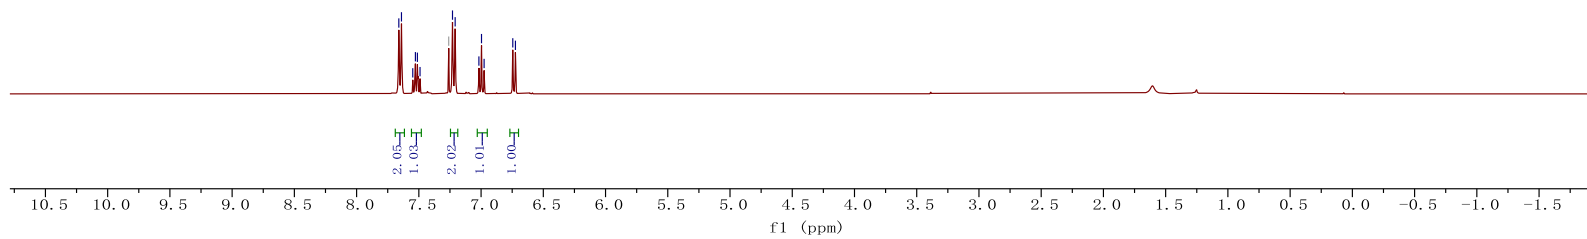

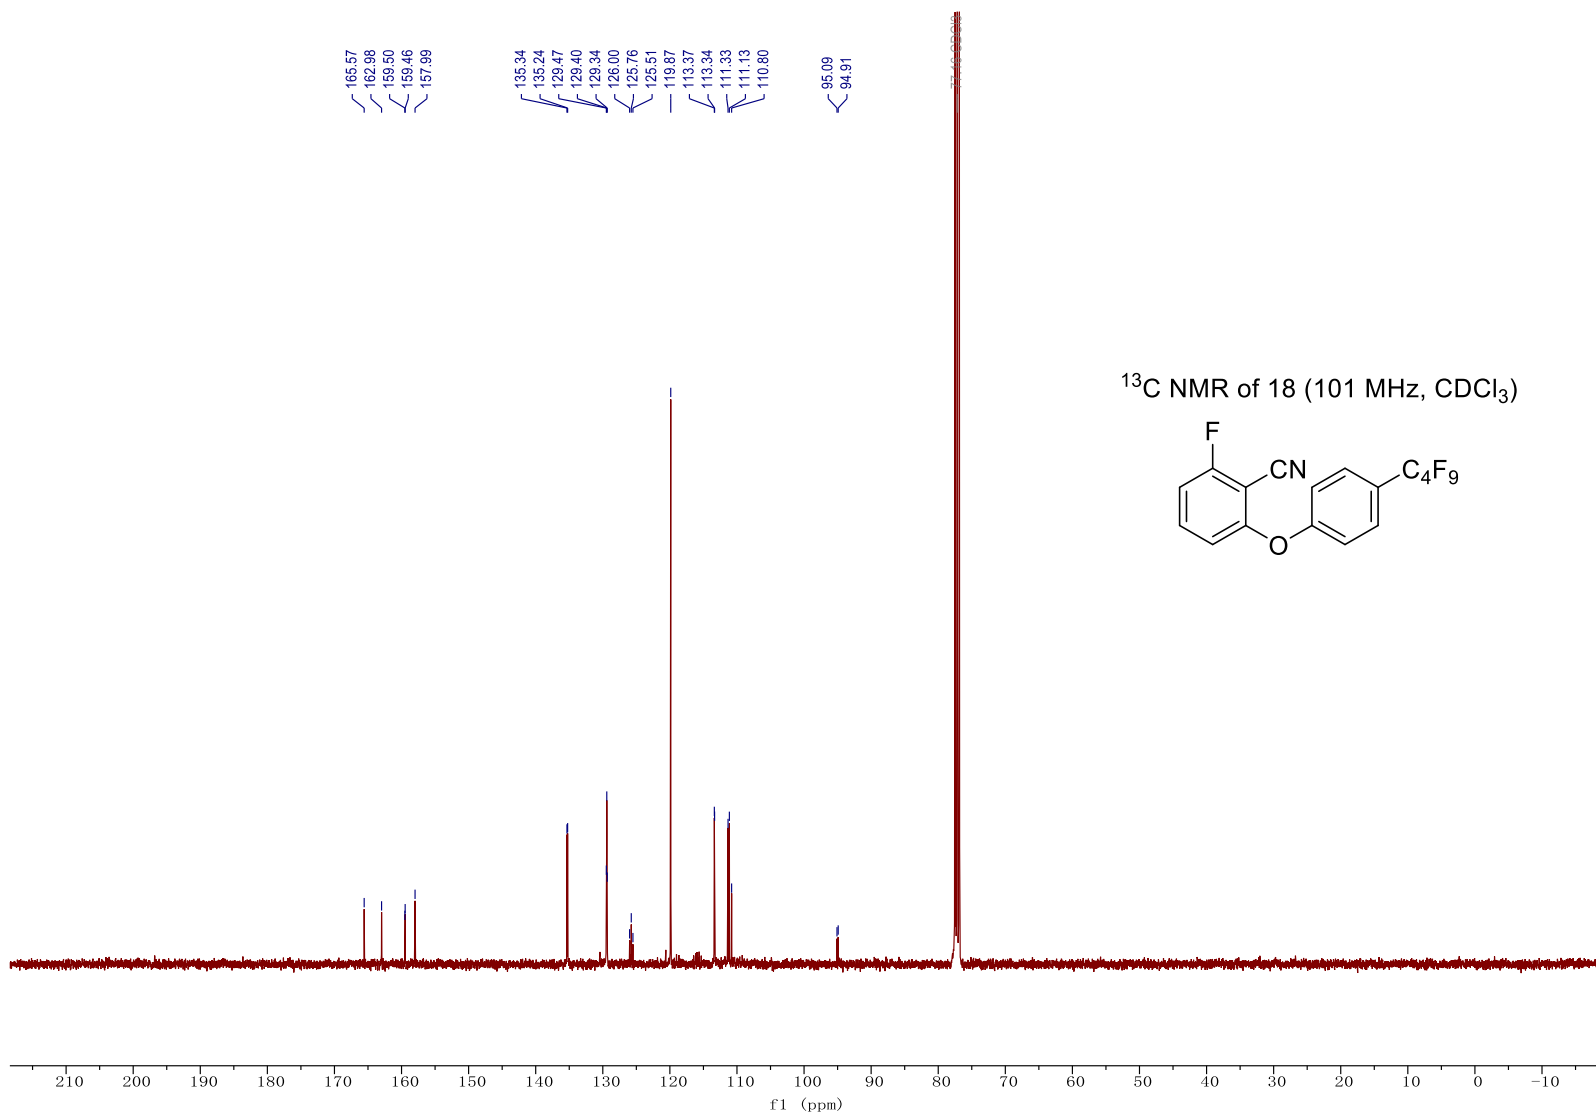

80.96  
80.99  
81.01

103.64  
103.66  
103.66  
110.43  
110.45  
110.49  
110.52  
122.65  
122.67  
122.72  
125.53  
125.58  
125.62

<sup>19</sup>F NMR of 18 (376 MHz, CDCl<sub>3</sub>)

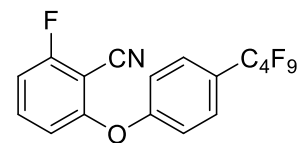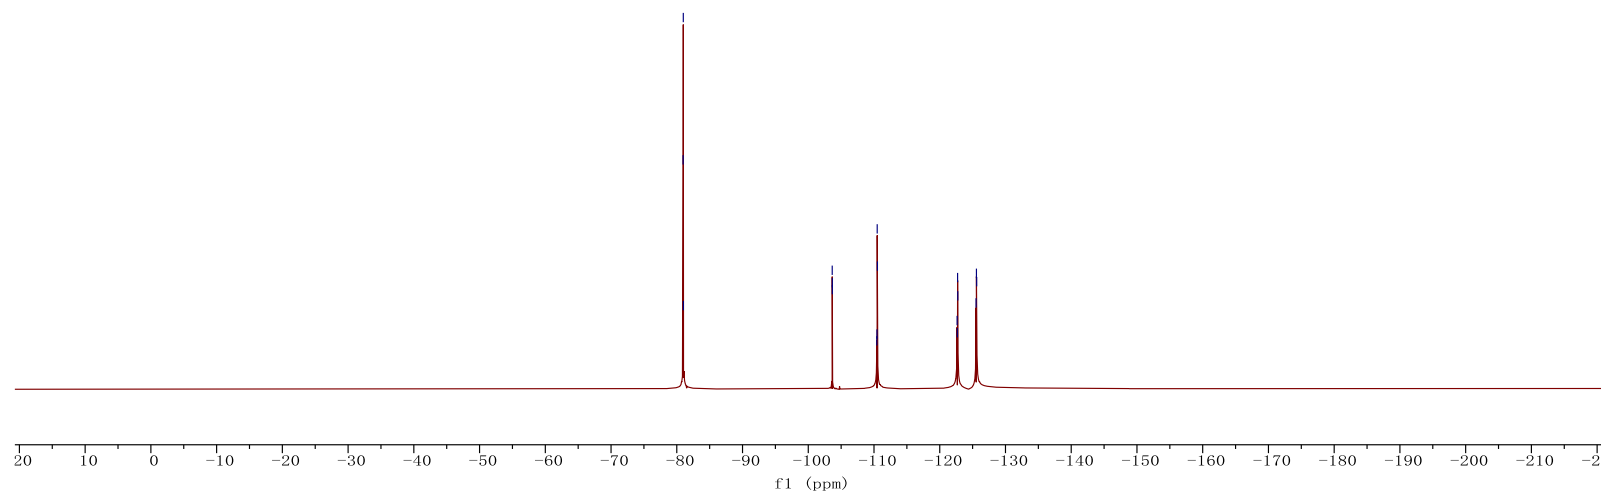

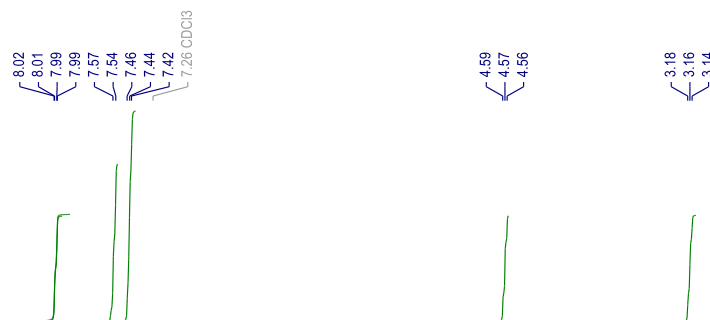

$^1\text{H}$  NMR of 19 (400 MHz,  $\text{CDCl}_3$ )

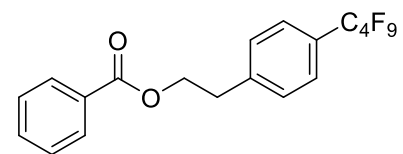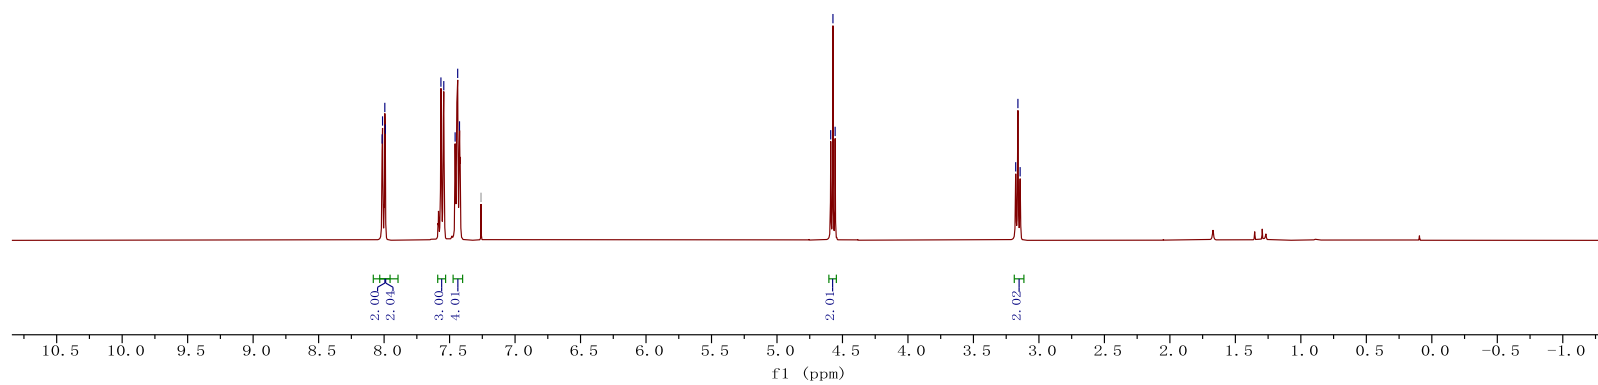

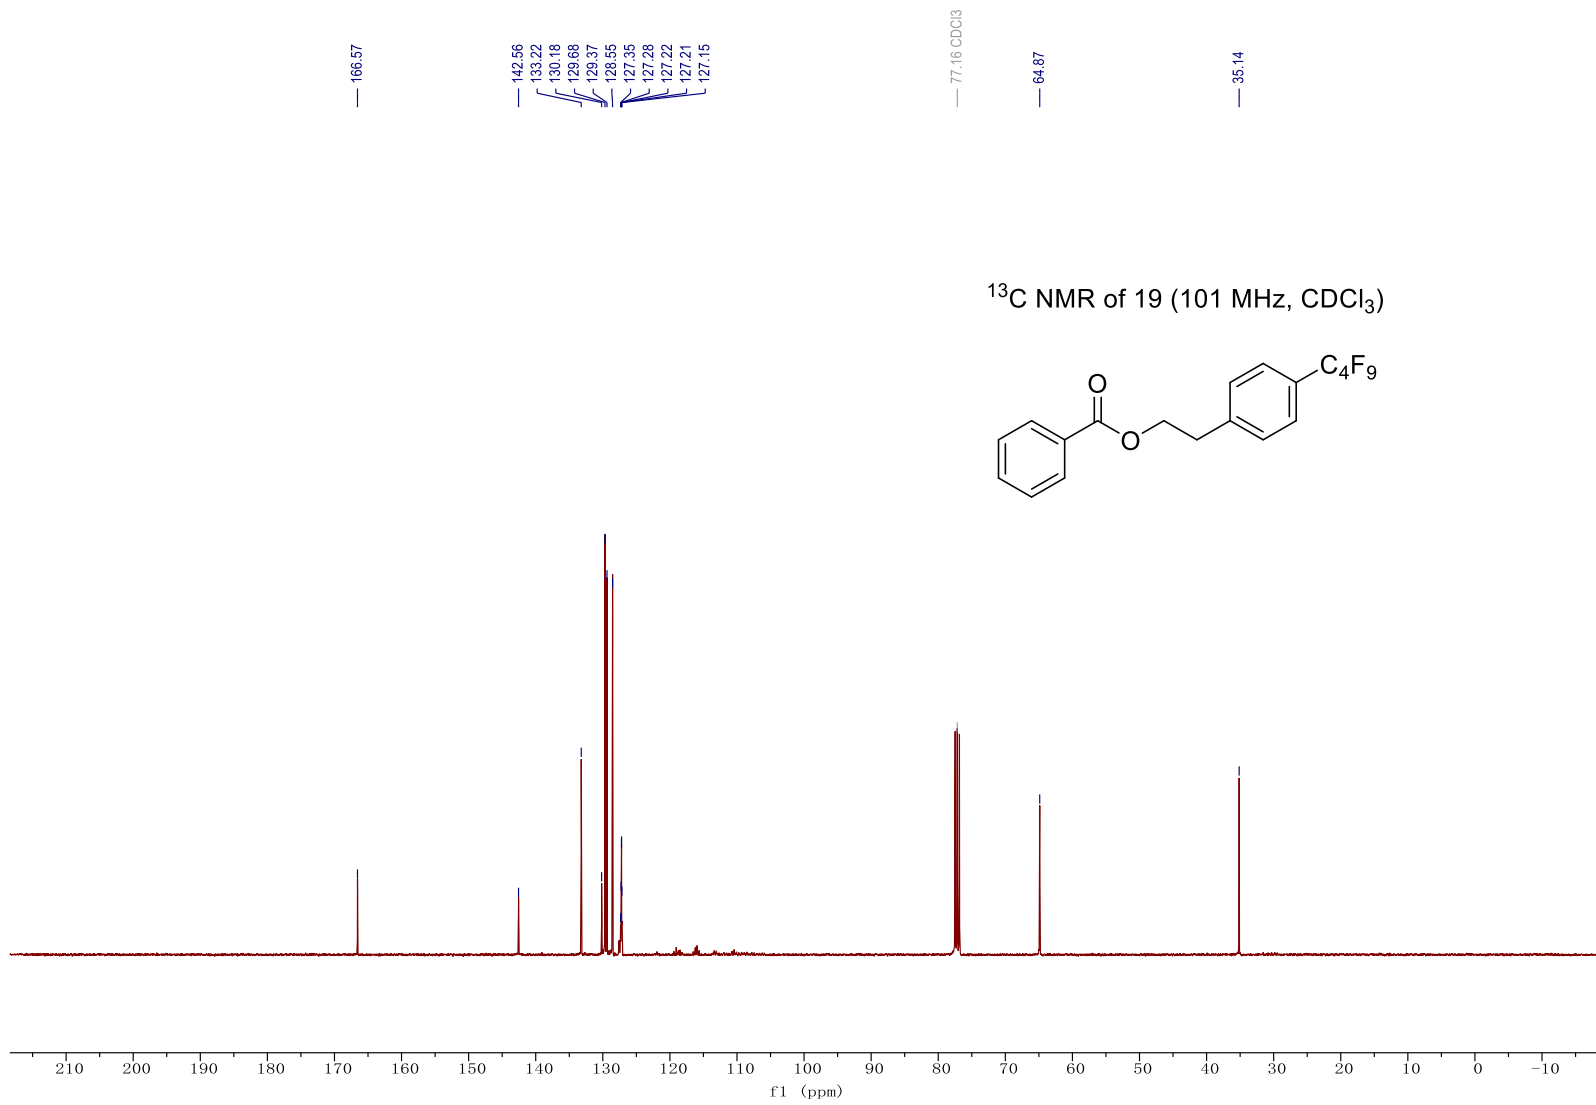

-81.03  
-81.06  
-81.10

-110.85  
-110.88  
-110.92  
-122.80  
-122.85  
-122.87  
-122.90  
-125.62  
-125.67  
-125.71  
-125.72

<sup>19</sup>F NMR of 19 (376 MHz, CDCl<sub>3</sub>)

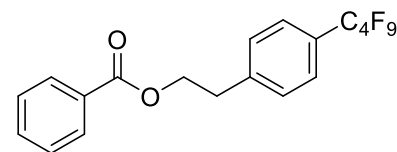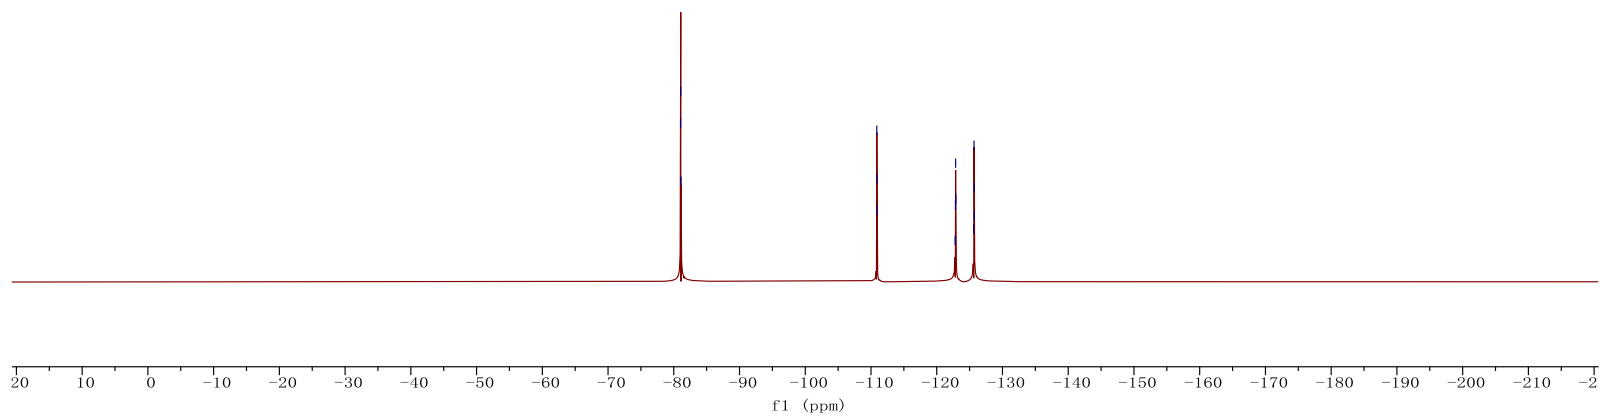

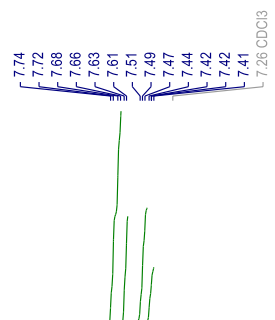

$^1\text{H}$  NMR of 20 (400 MHz,  $\text{CDCl}_3$ )

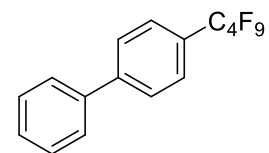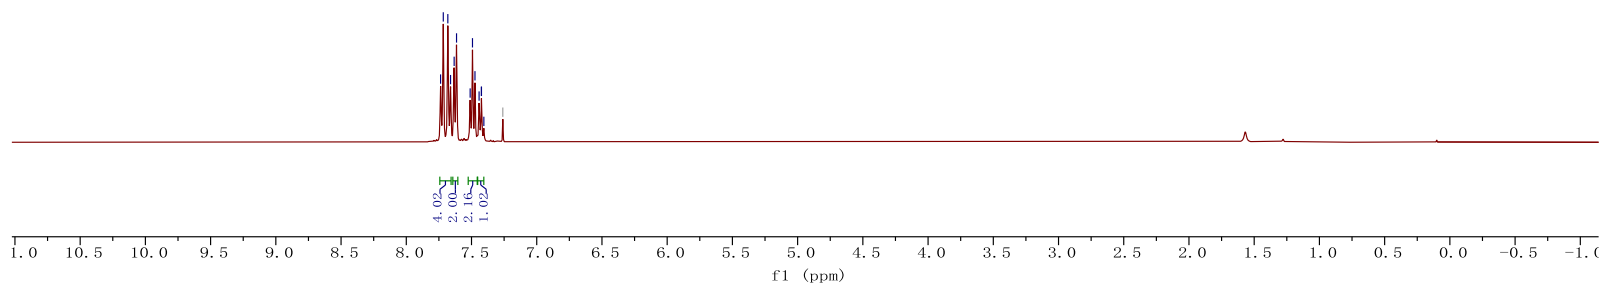

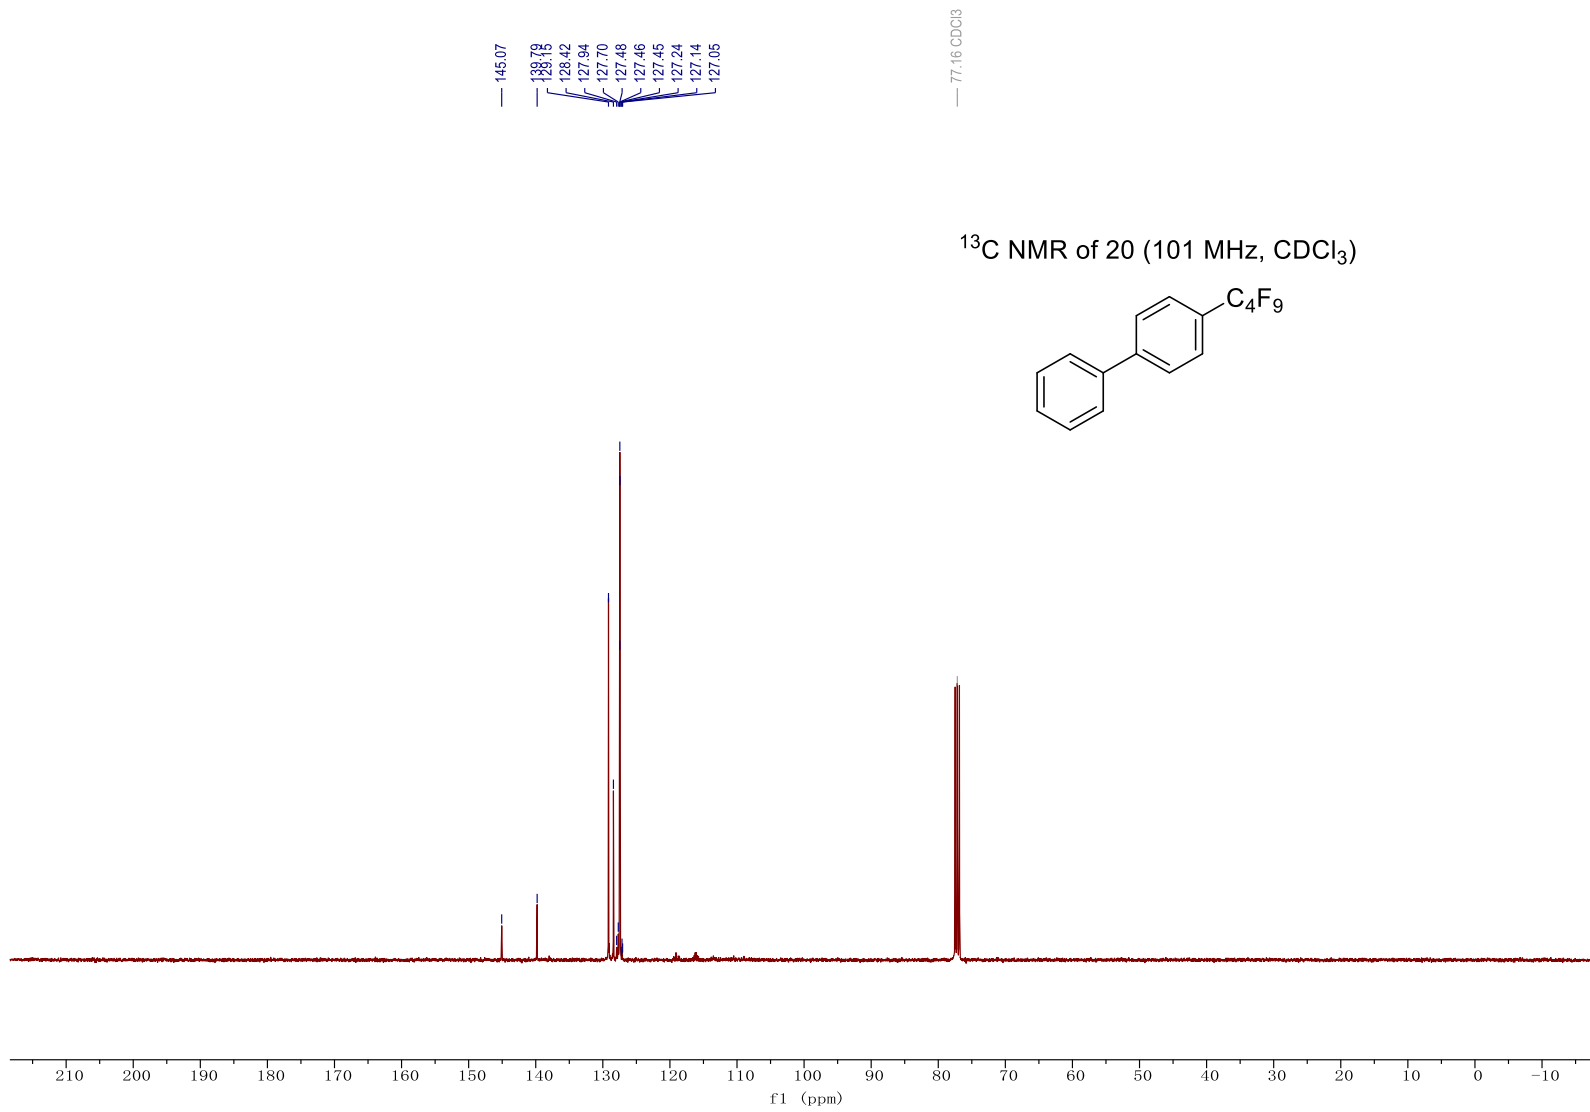

-80.99  
-81.01  
-81.04

-110.77  
-110.80  
-110.84  
-122.64  
-122.67  
-122.70  
-122.72  
-125.52  
-125.55  
-125.56  
-125.59

$^{19}\text{F}$  NMR of 20 (376 MHz,  $\text{CDCl}_3$ )

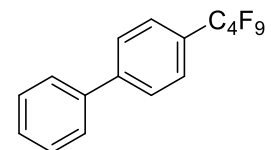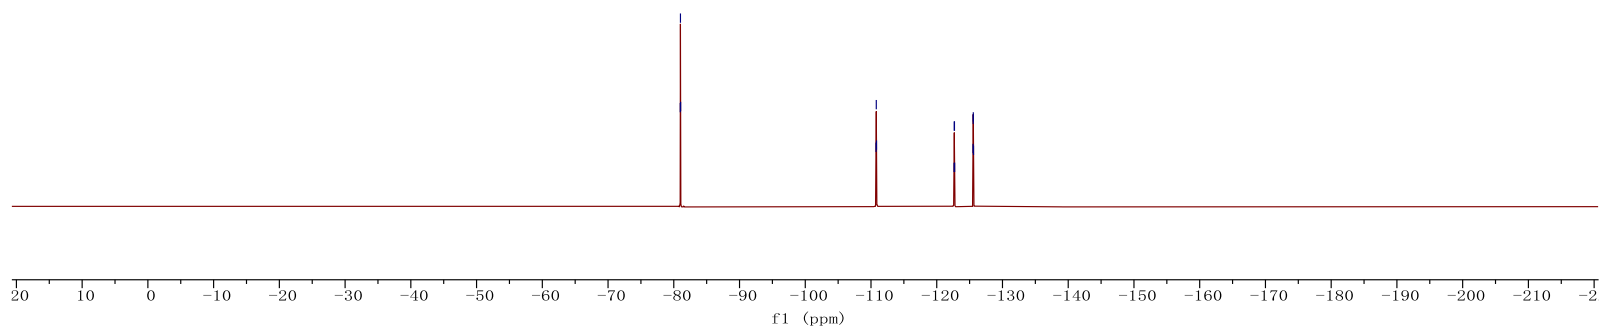

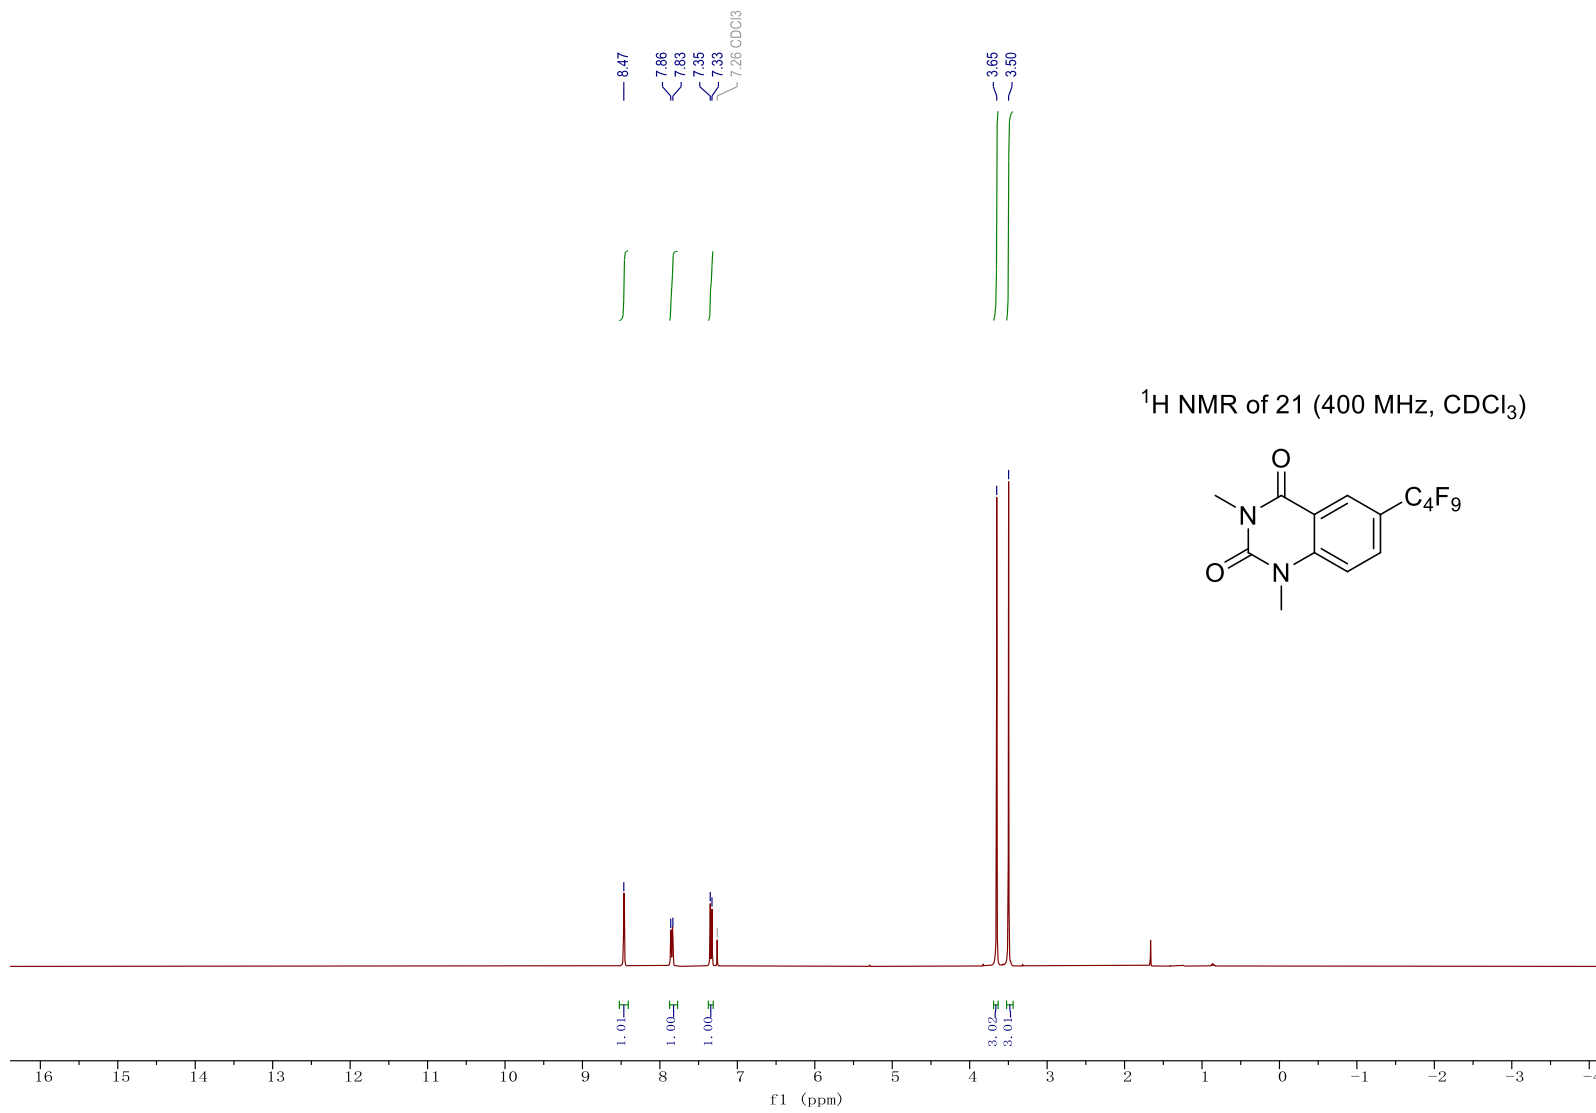

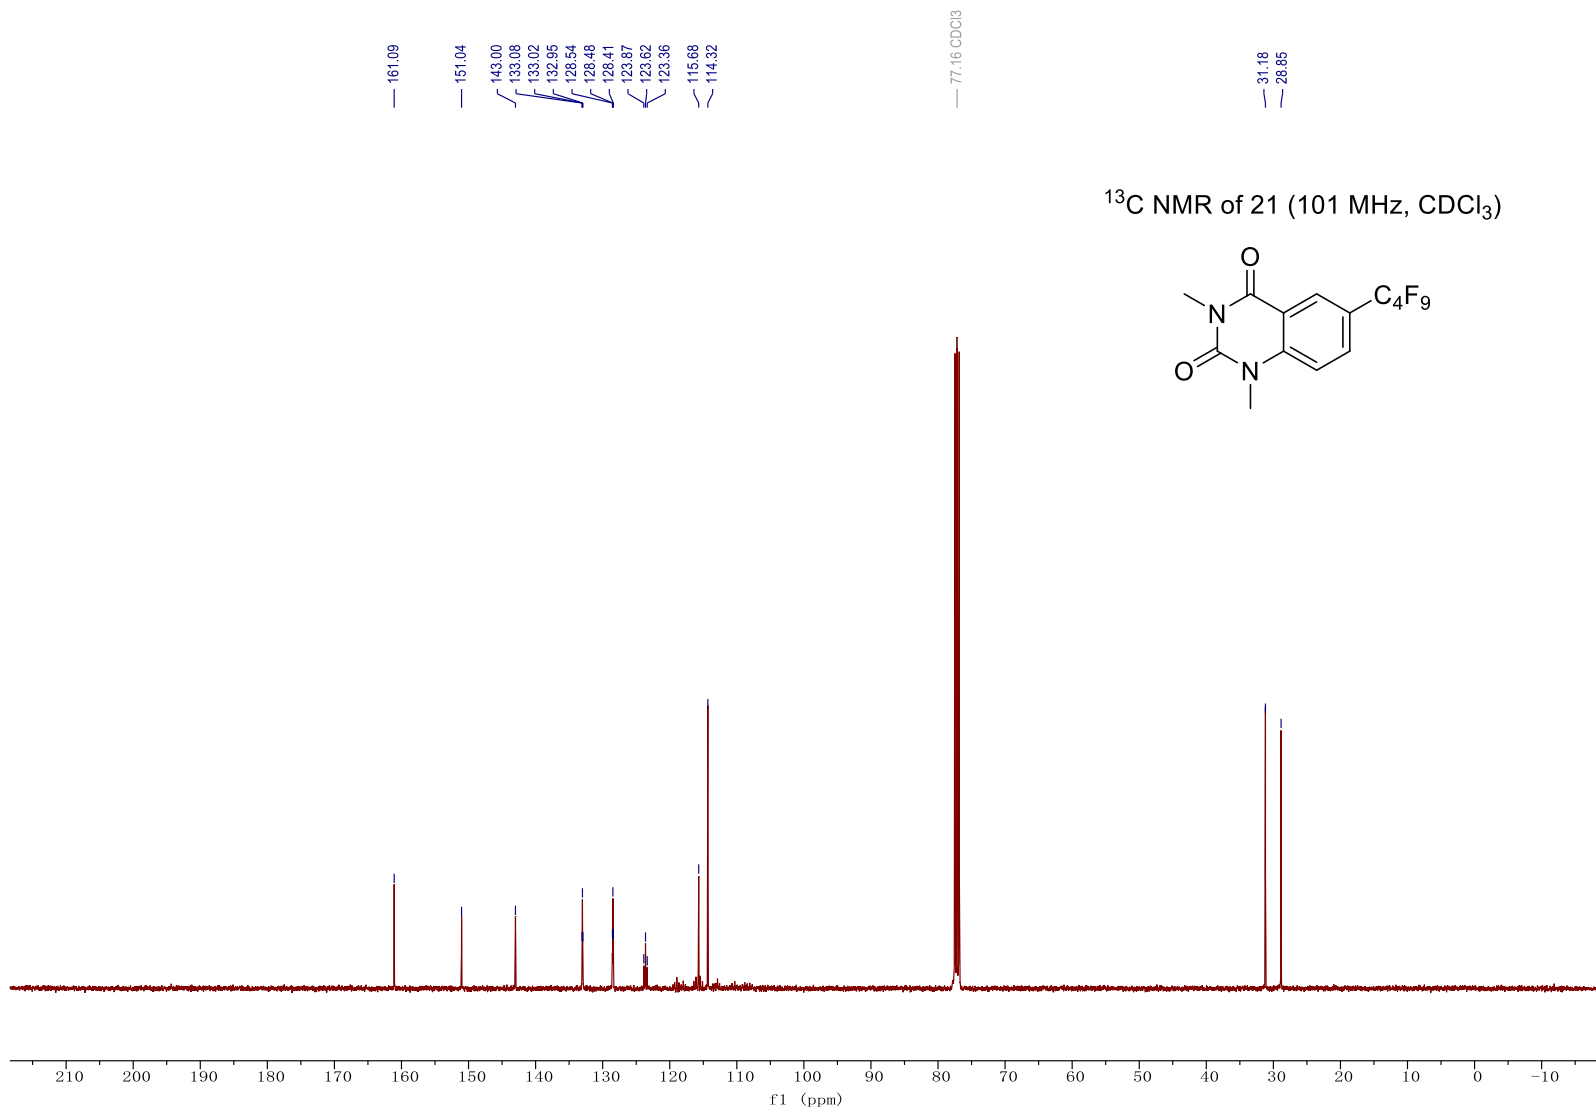

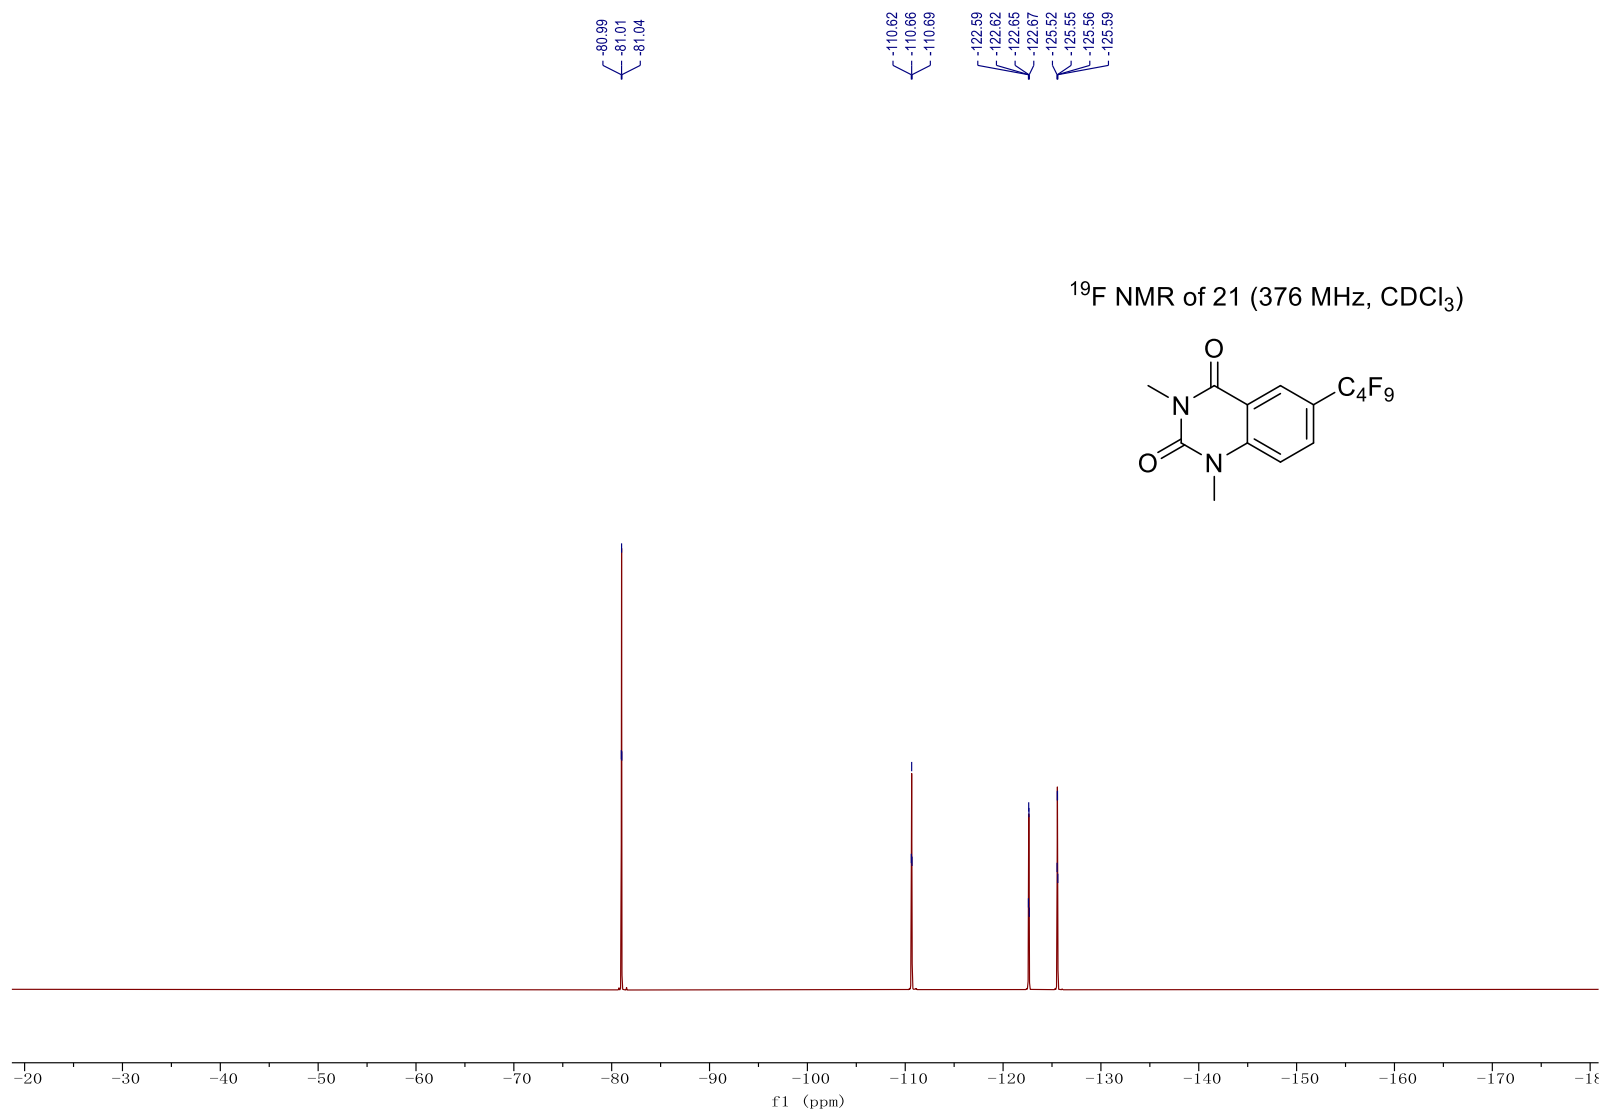

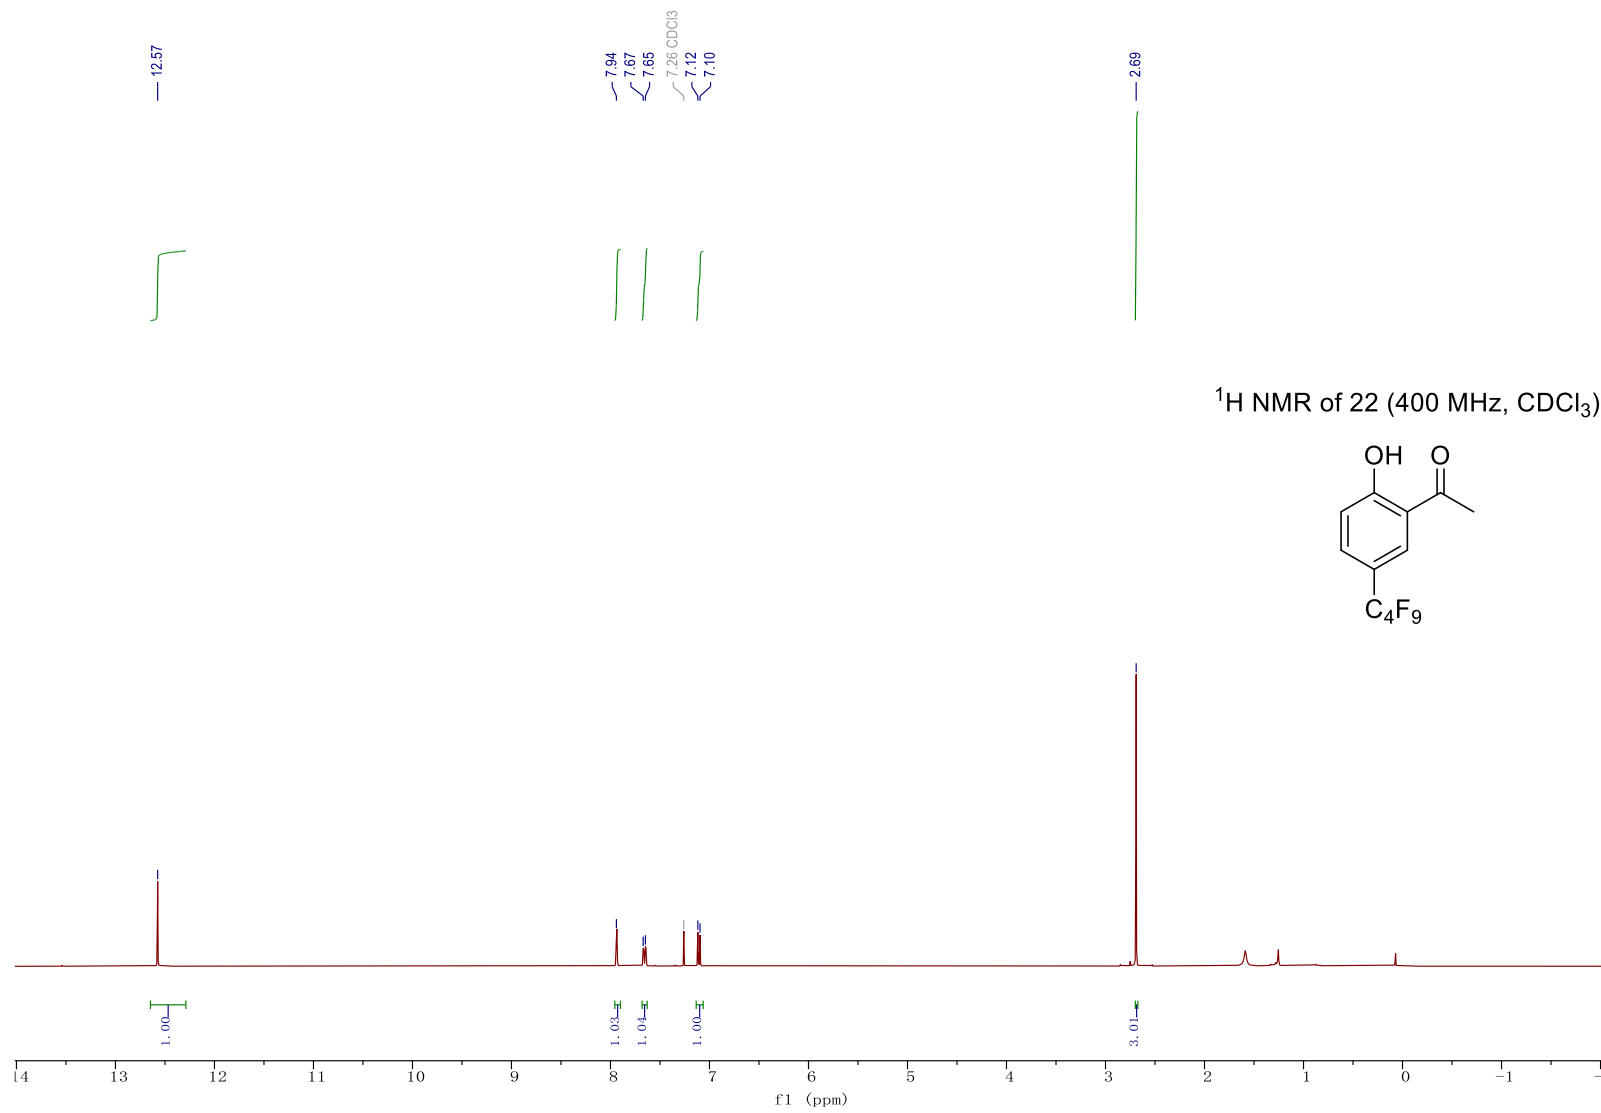

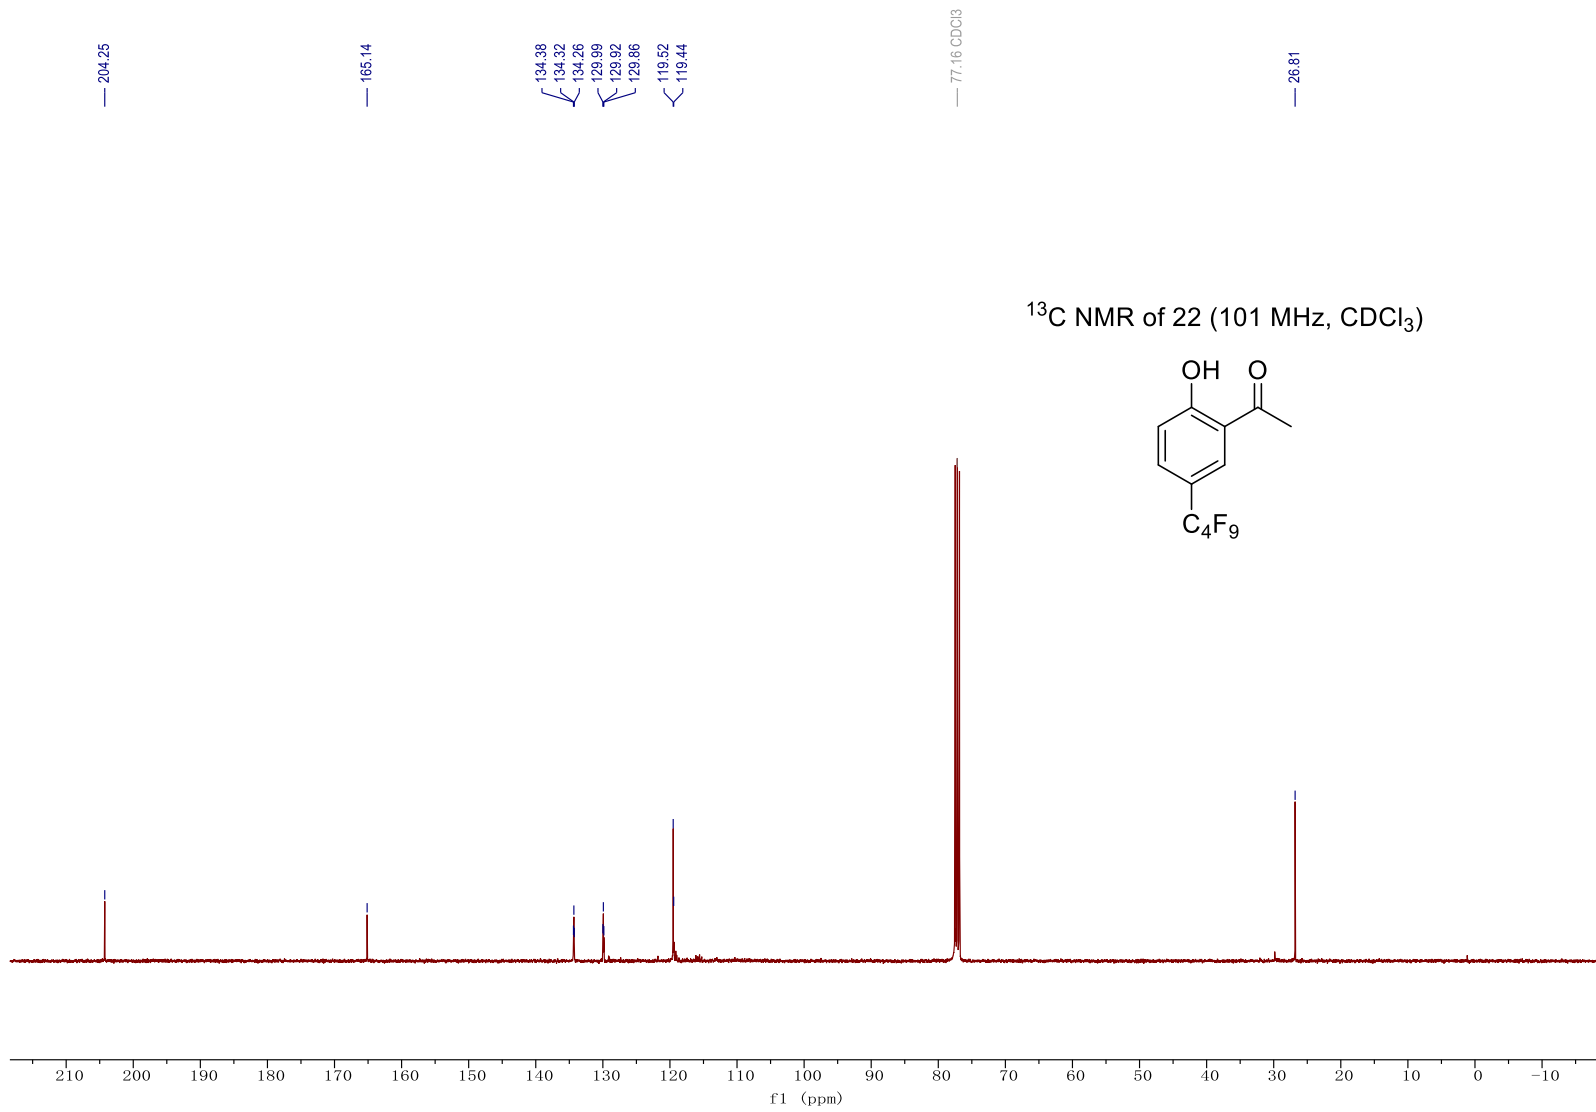

-81.03  
-81.05  
-81.08

-110.28  
-110.31  
-110.35  
-122.67  
-122.68  
-122.70  
-122.71  
-125.52  
-125.55  
-125.57  
-125.60  
-125.60

$^{19}\text{F}$  NMR of 22 (376 MHz,  $\text{CDCl}_3$ )

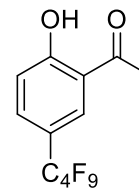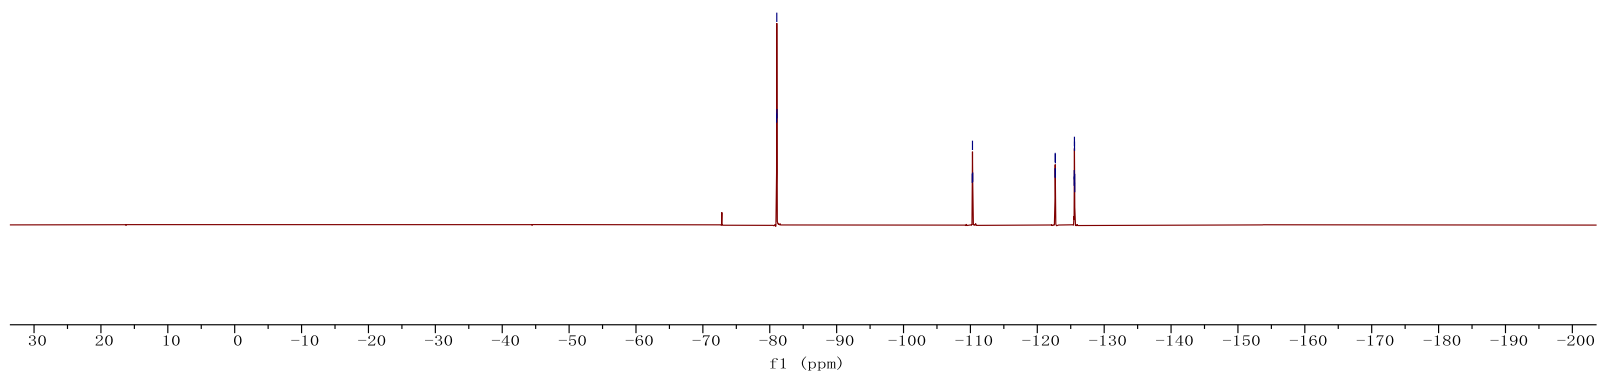

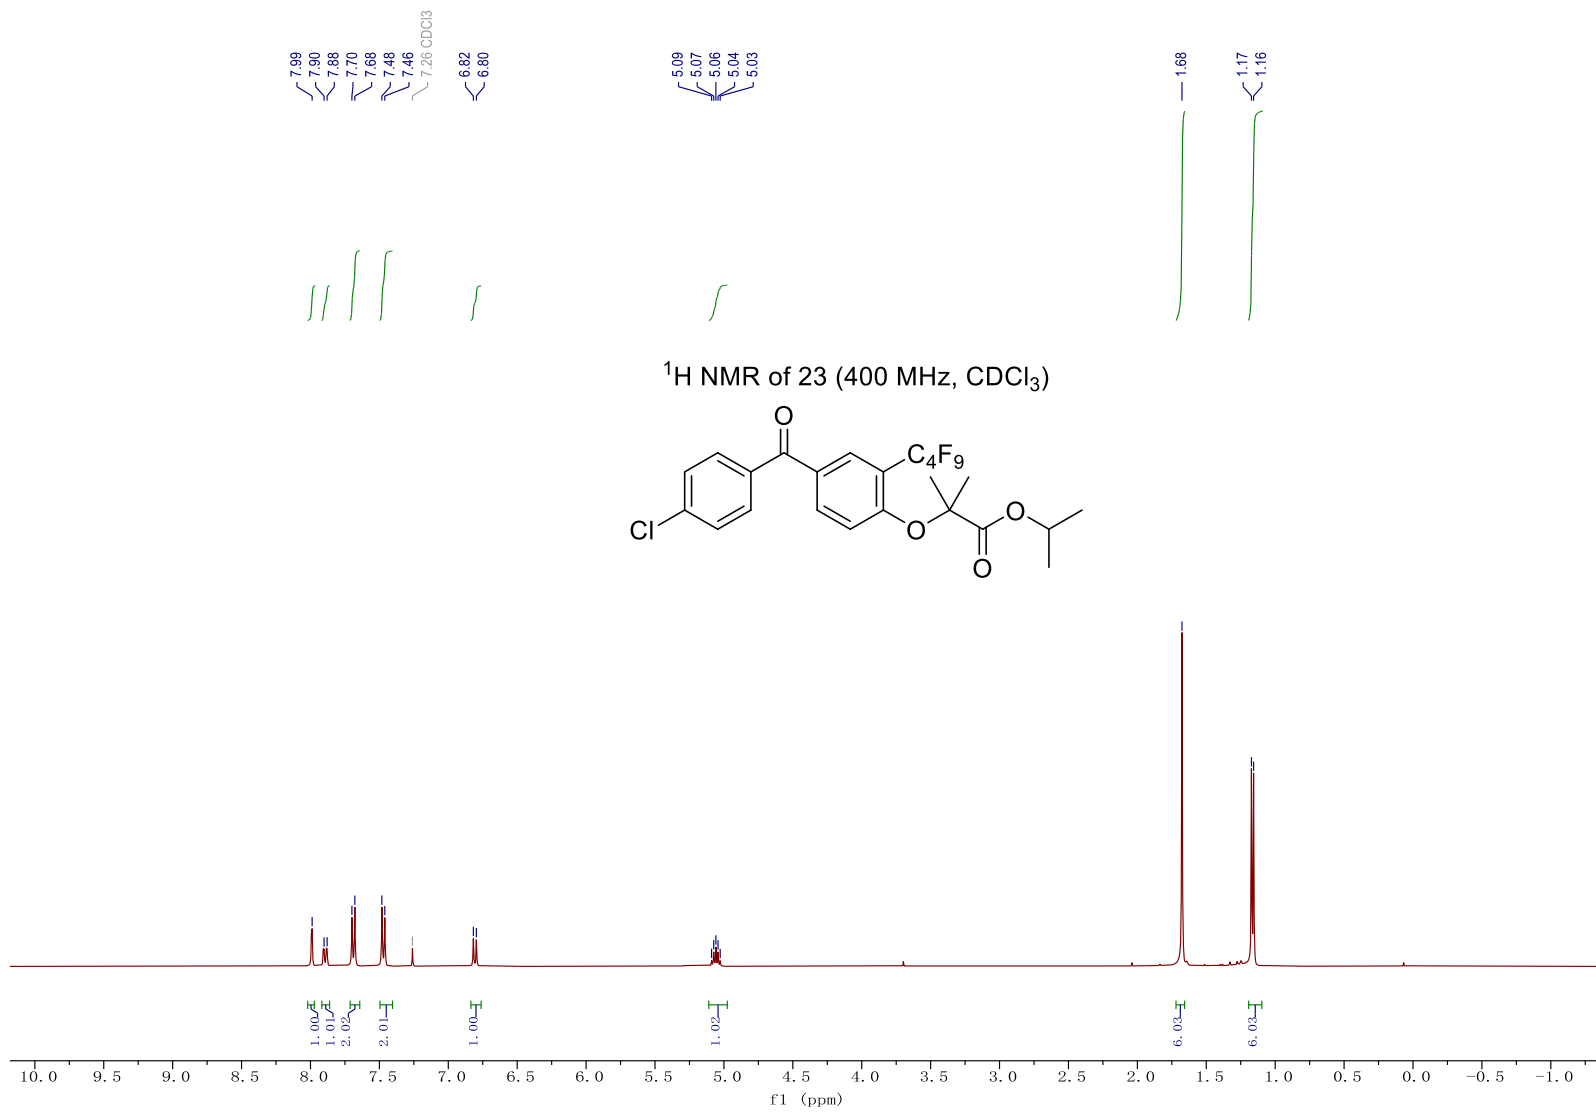

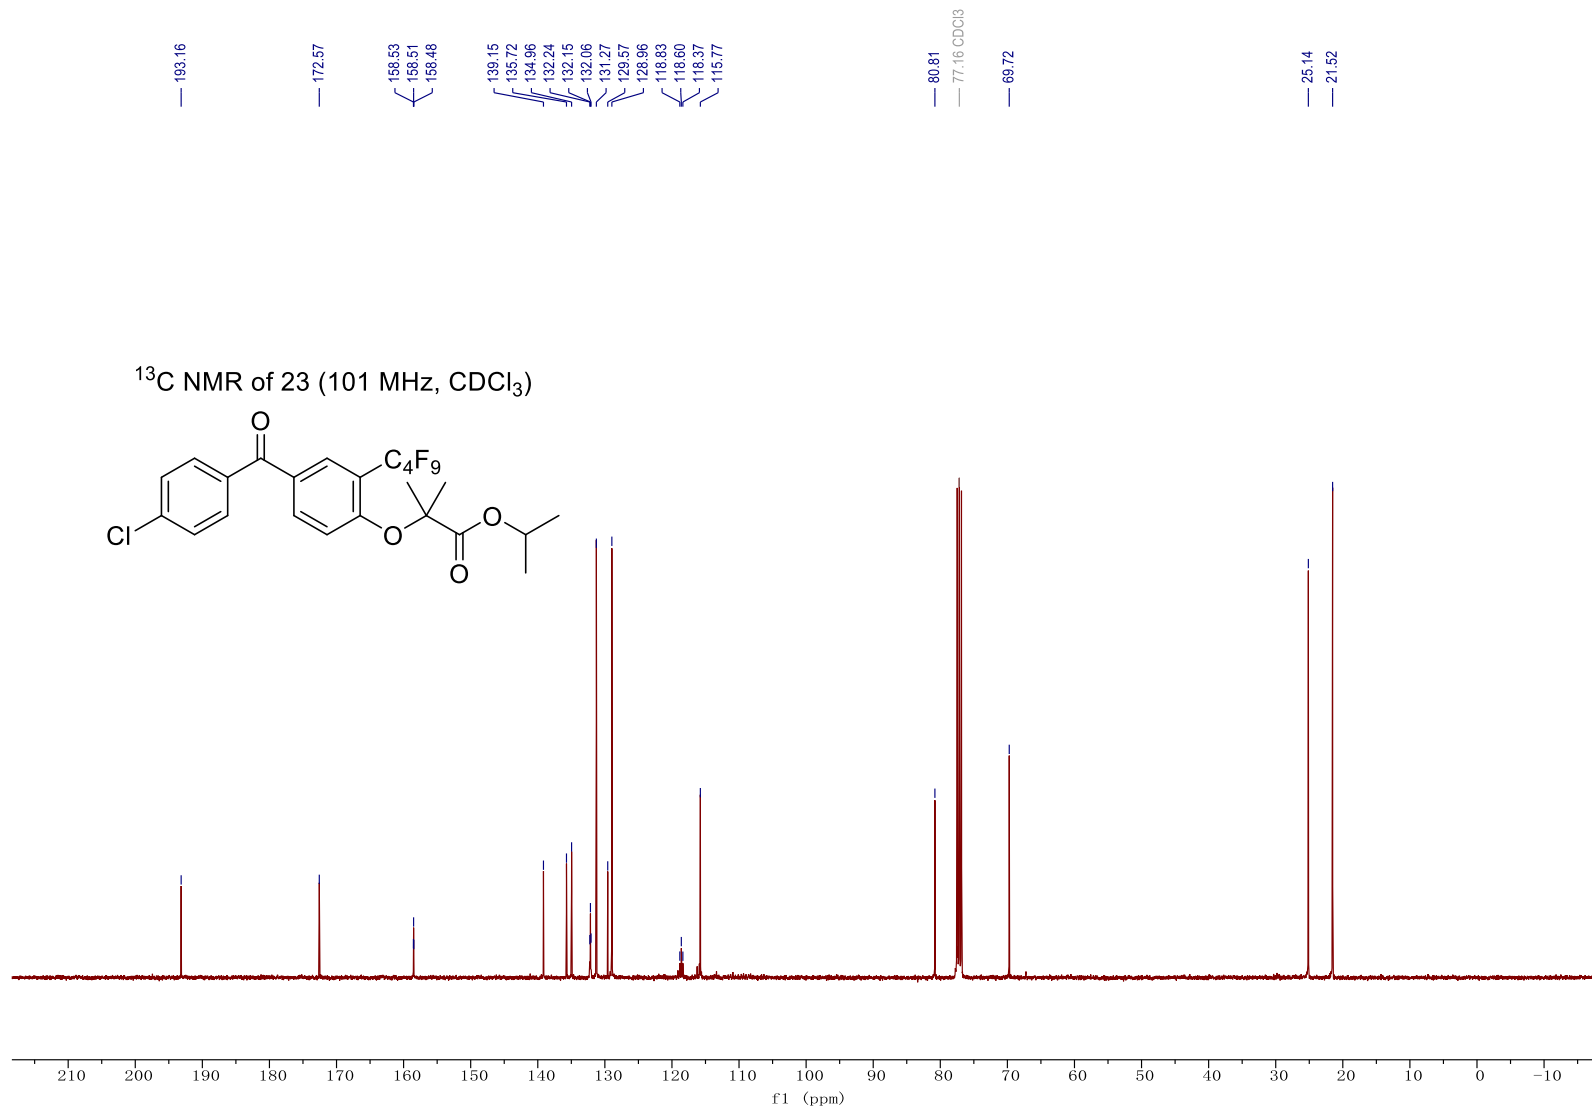

-80.86  
-80.89  
-80.92  
-80.93

-107.81  
-107.85  
-107.88

-121.36  
-121.38  
-121.41

-125.97  
-126.04  
-126.07

$^{19}\text{F}$  NMR of 23 (376 MHz,  $\text{CDCl}_3$ )

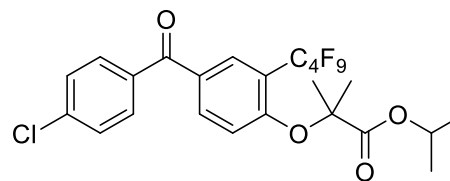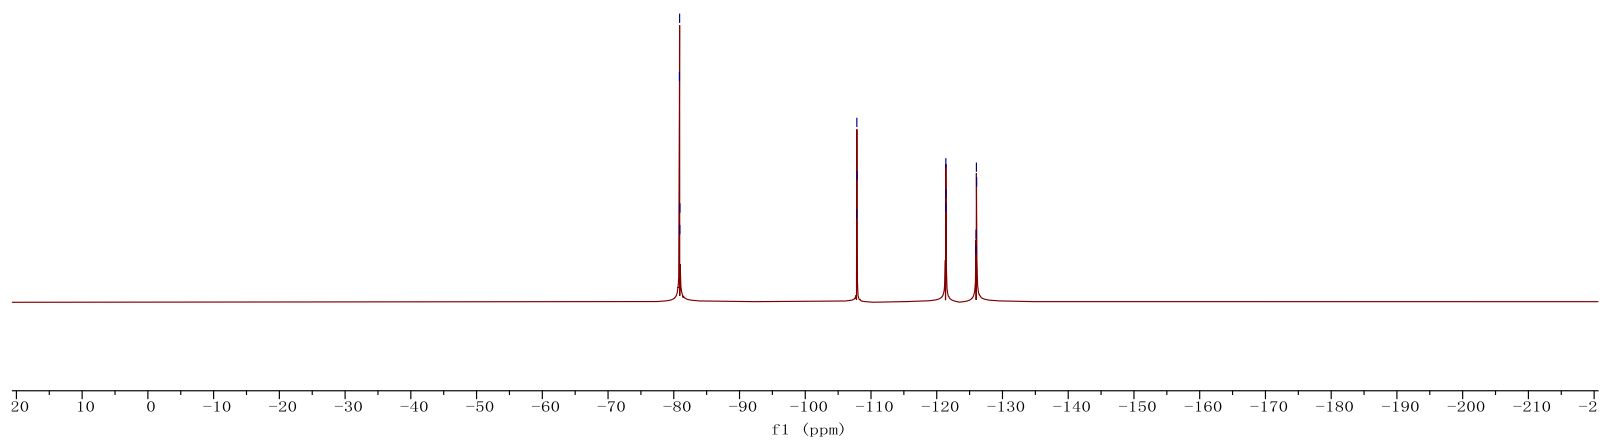

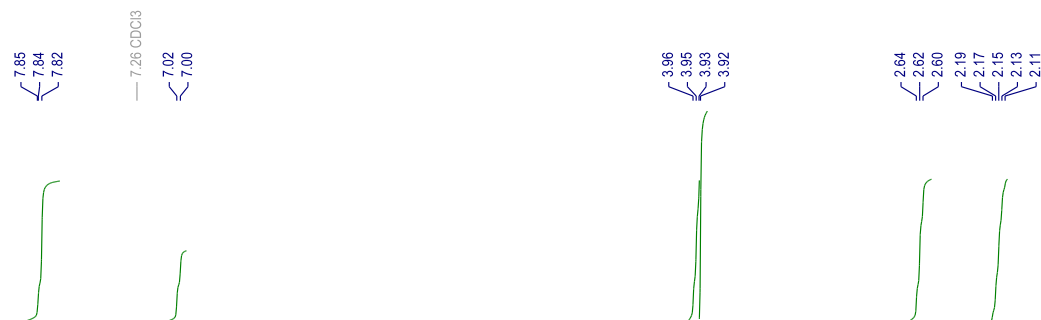

<sup>1</sup>H NMR of 24 (400 MHz, CDCl<sub>3</sub>)

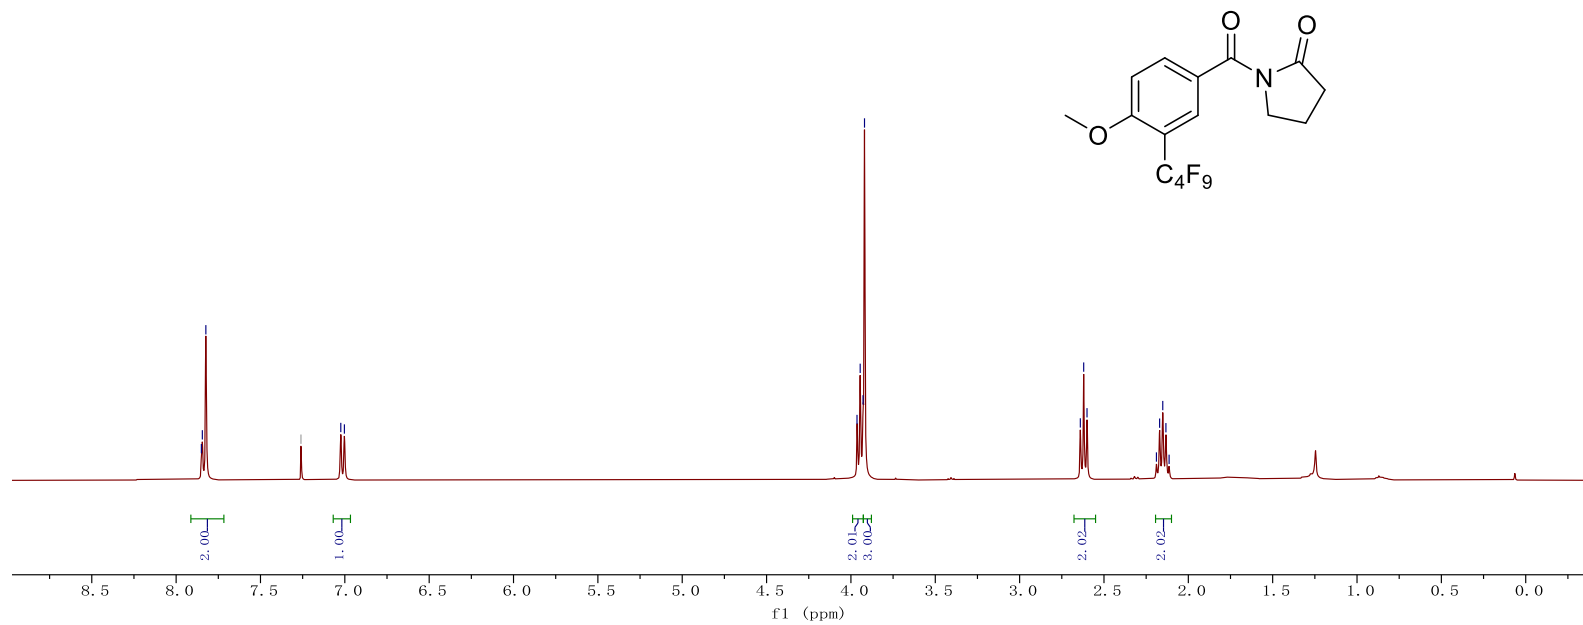

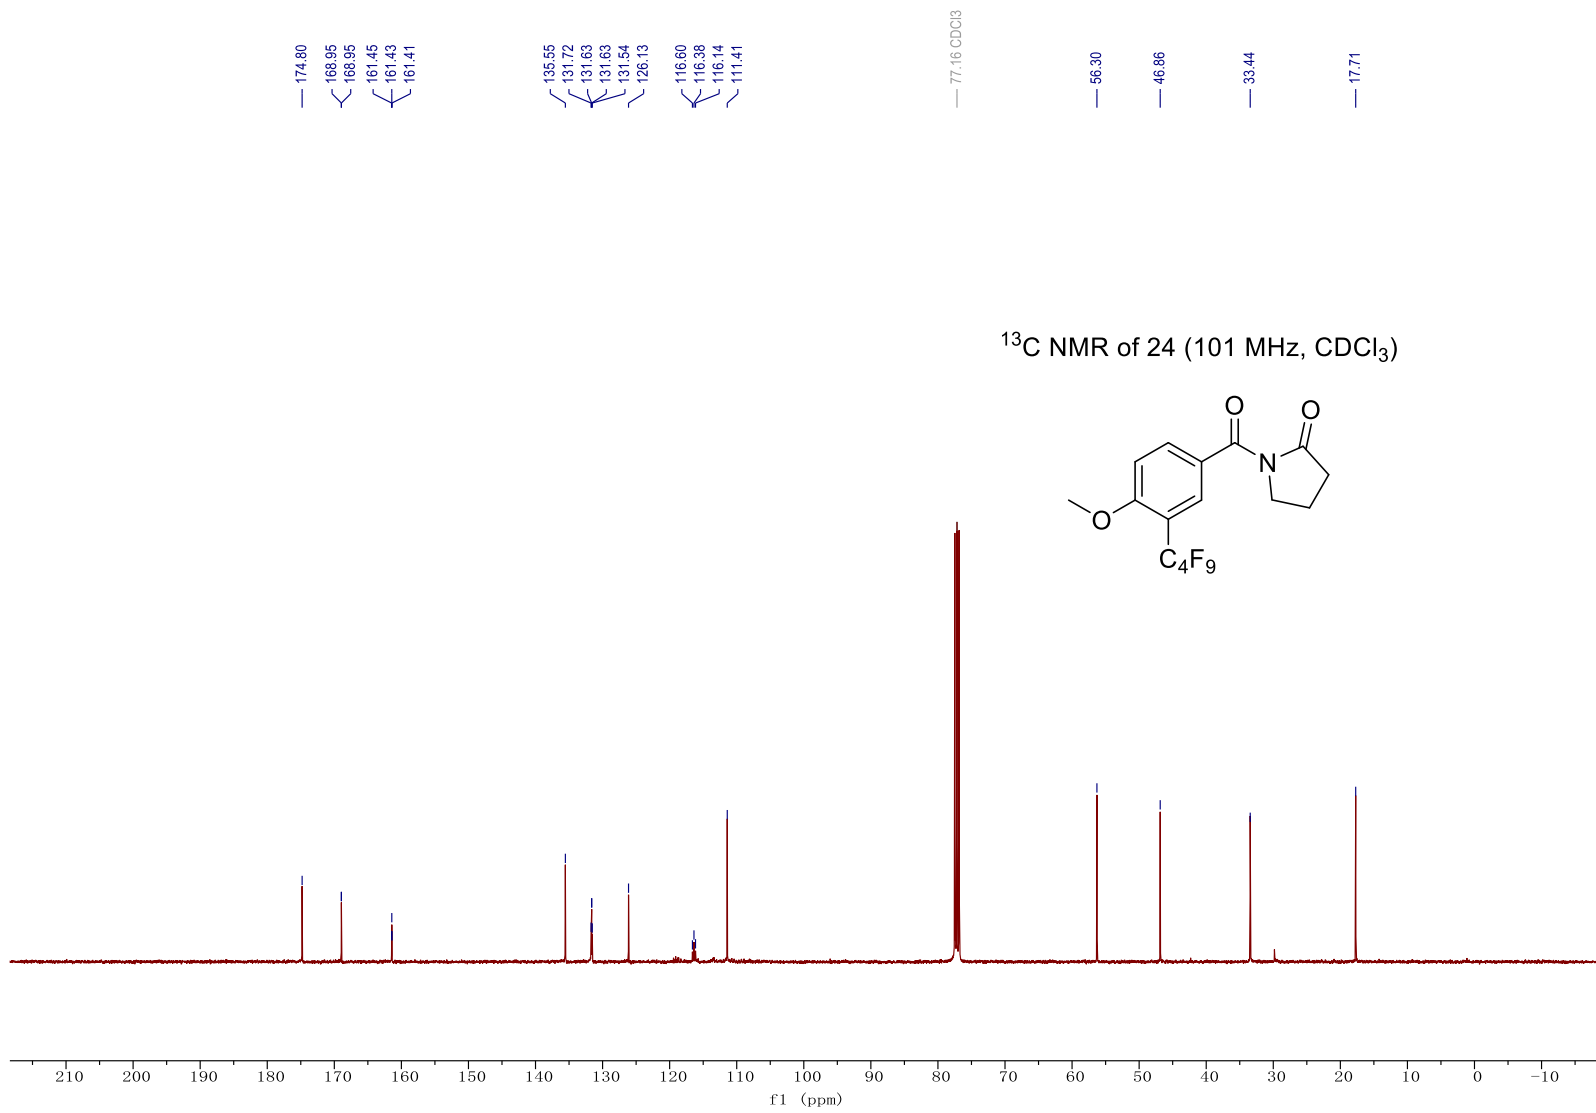

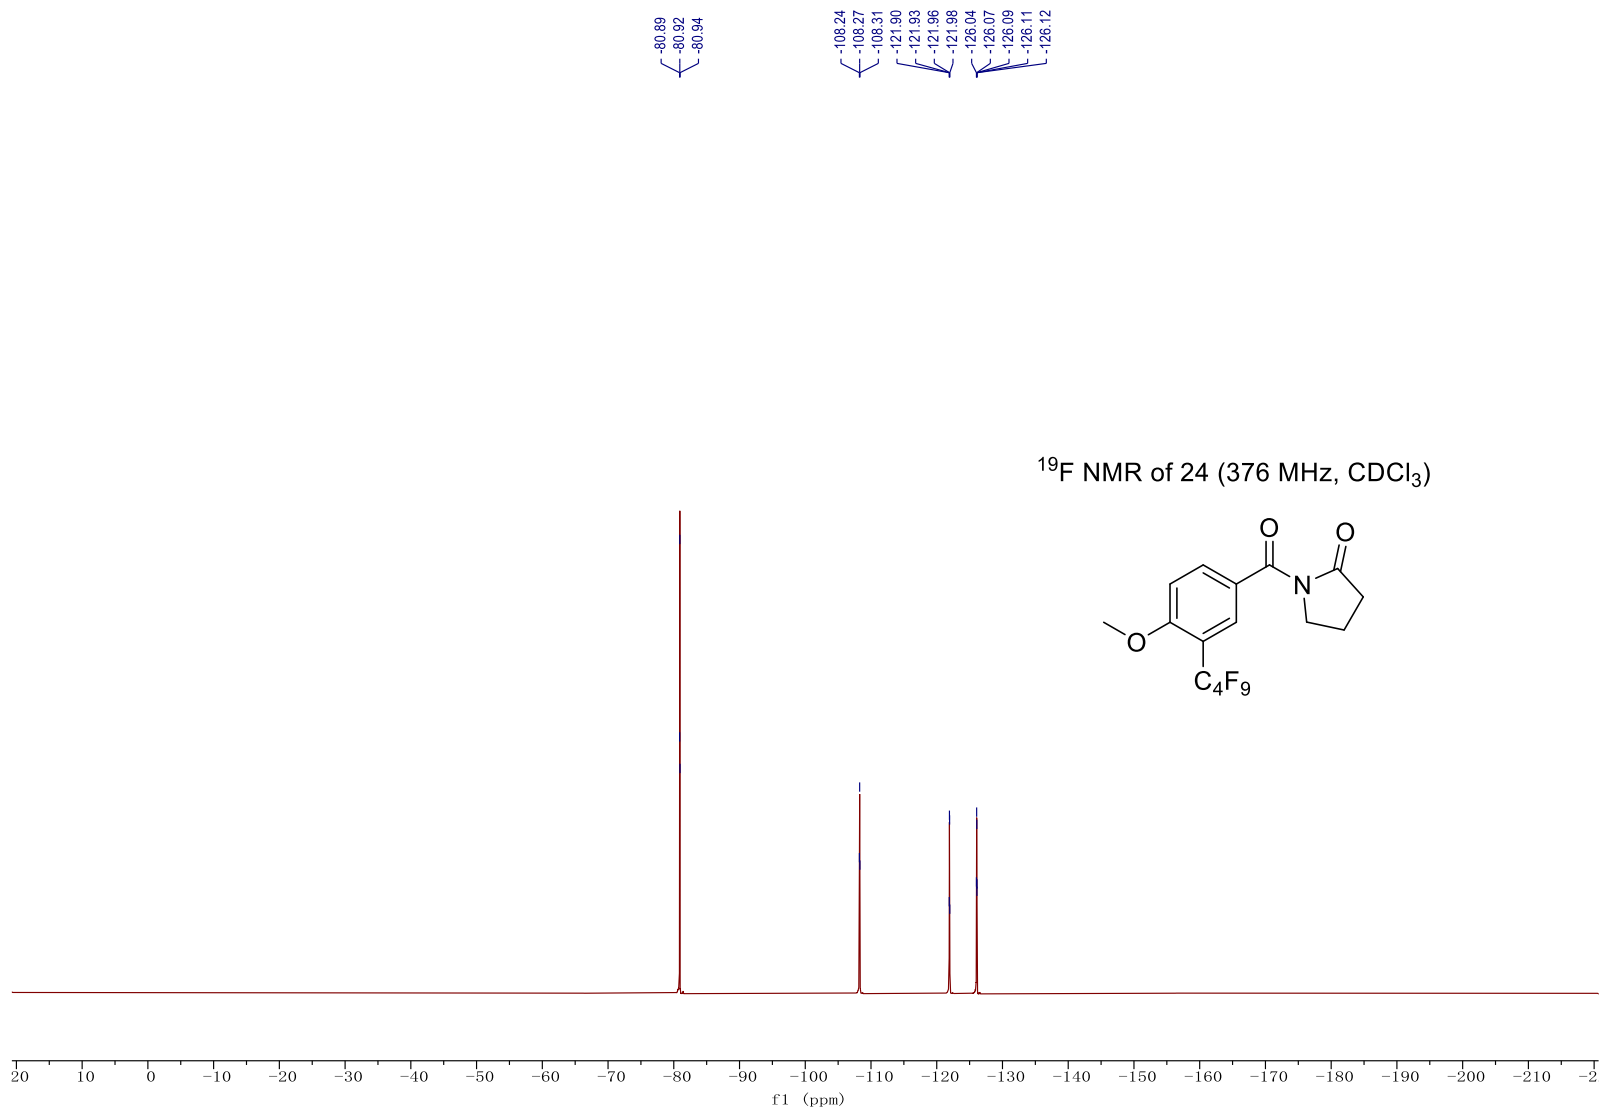

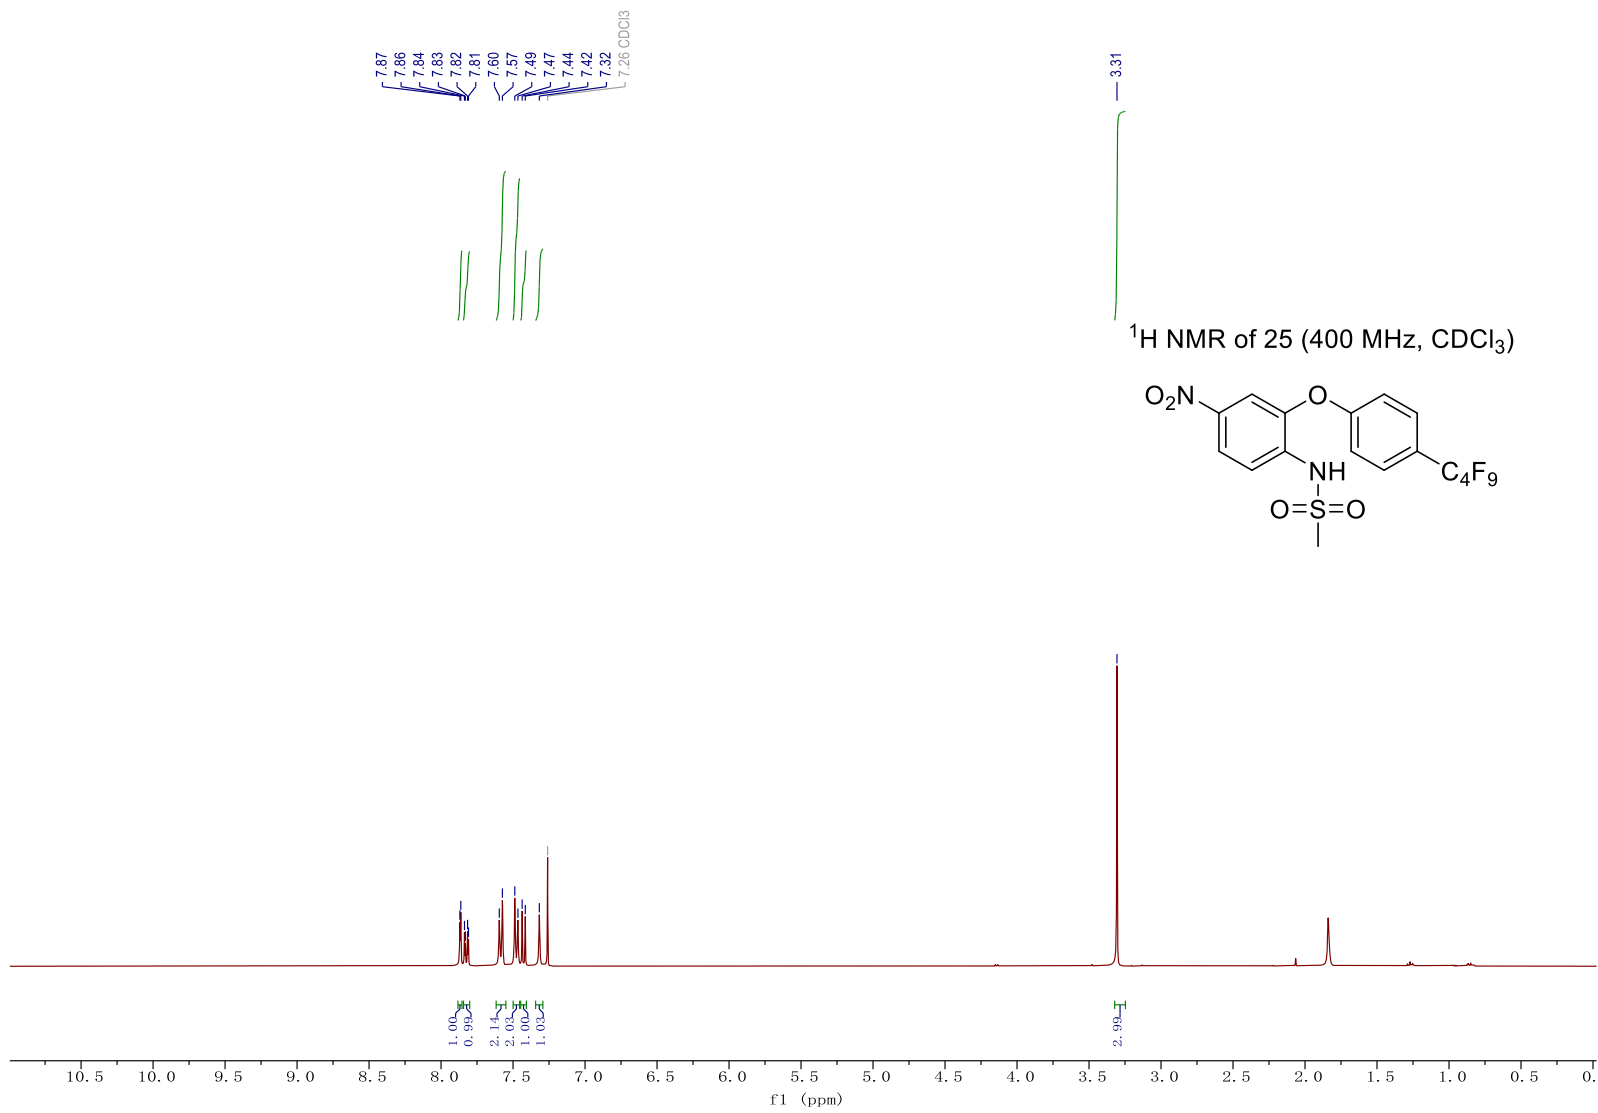

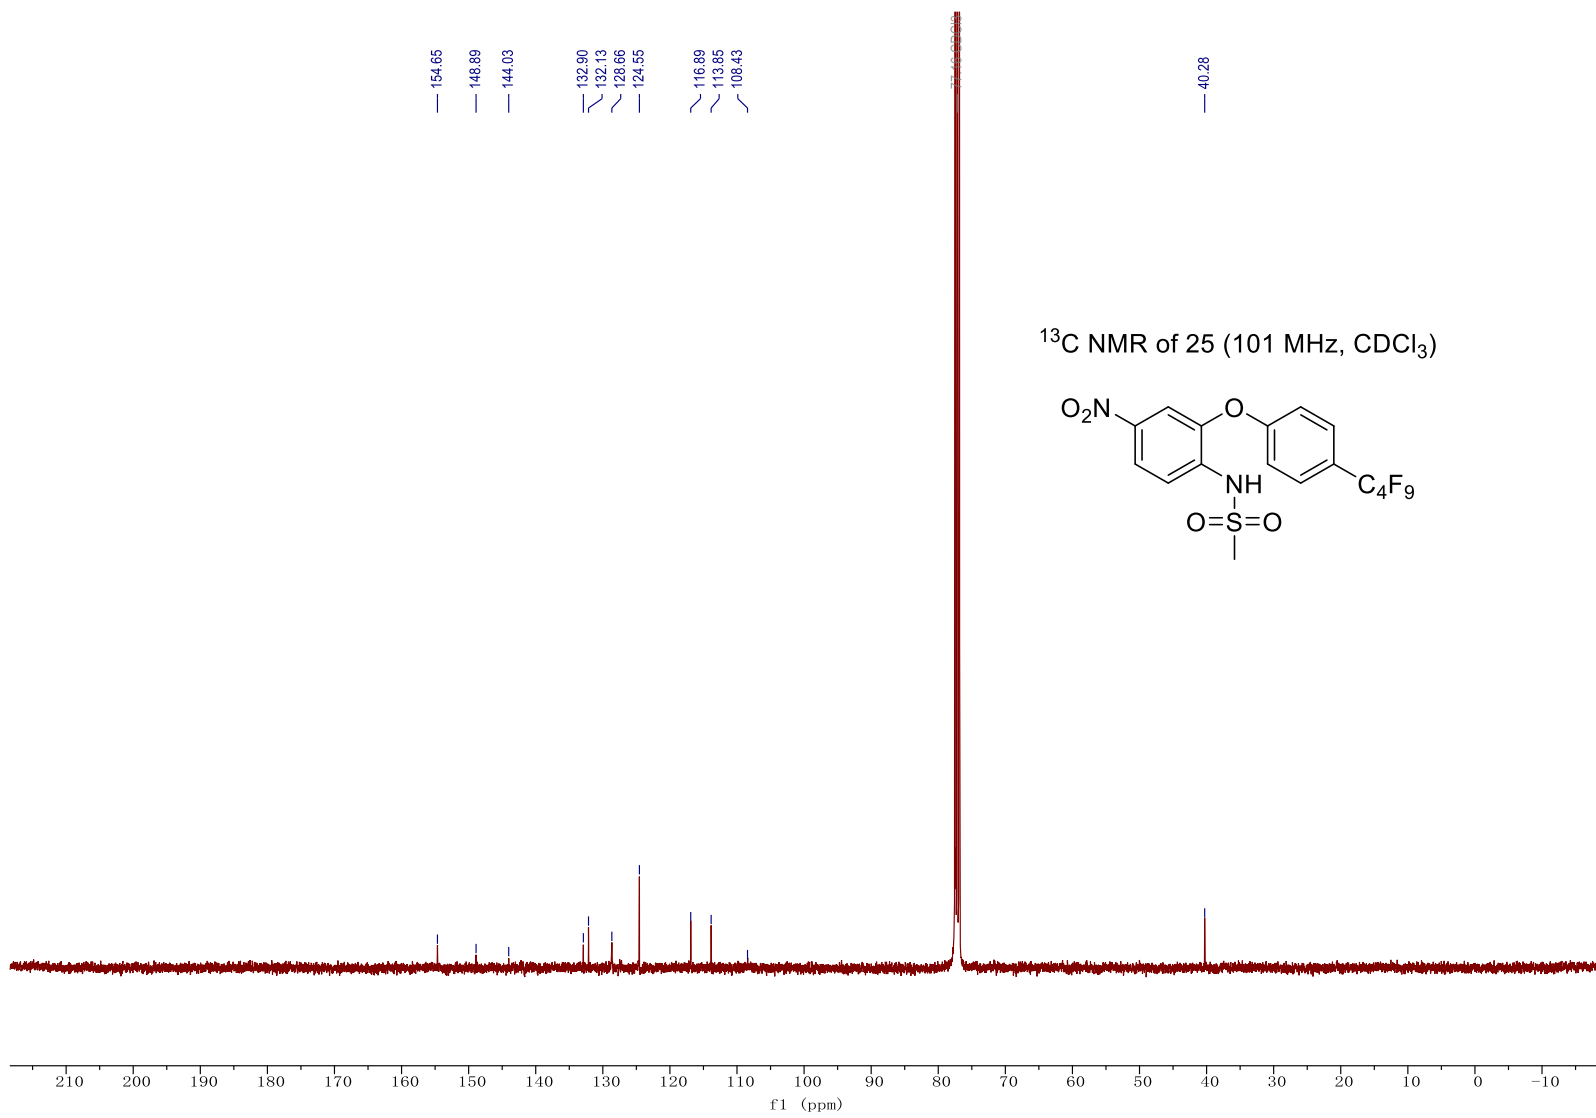

-80.94  
-80.95  
-80.97  
-81.02

-110.90  
-110.94  
-110.97  
-122.61  
-122.63  
-122.66  
-122.68  
-125.61  
-125.64  
-125.66

$^{19}\text{F}$  NMR of 25 (376 MHz,  $\text{CDCl}_3$ )

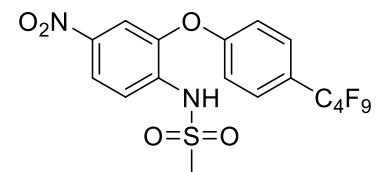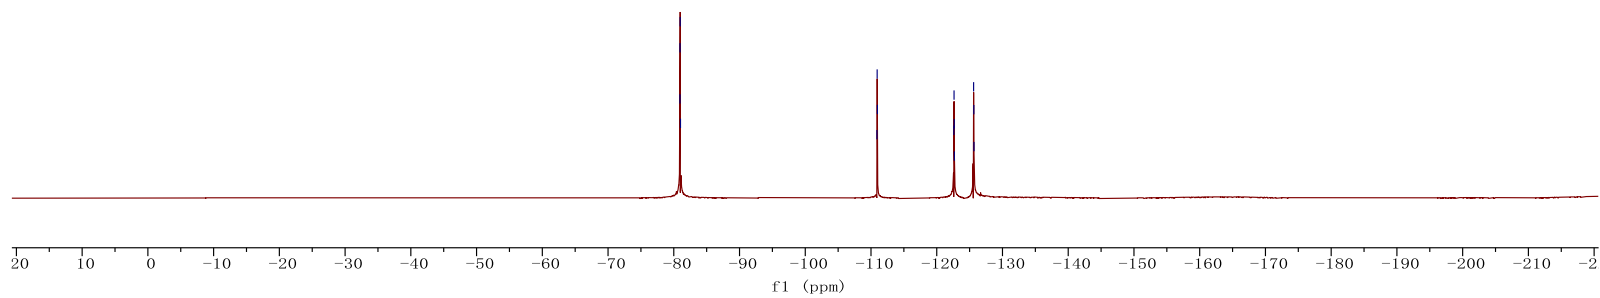

S103

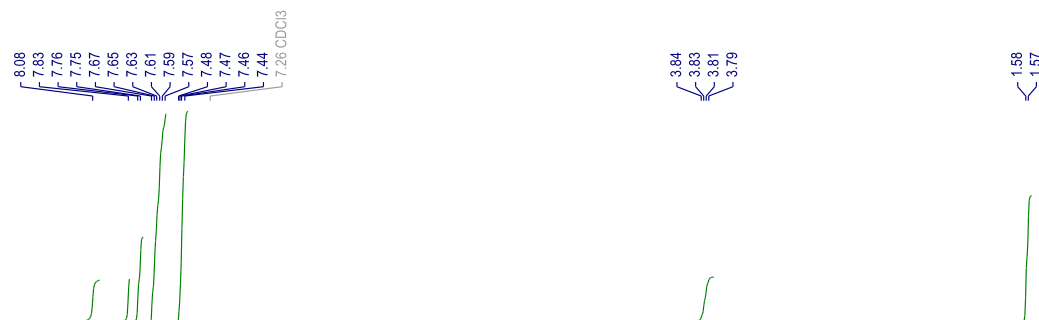

<sup>1</sup>H NMR of 26 (400 MHz, CDCl<sub>3</sub>)

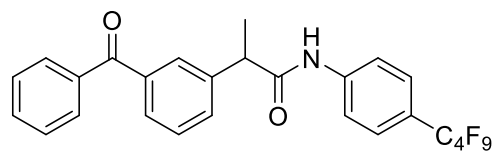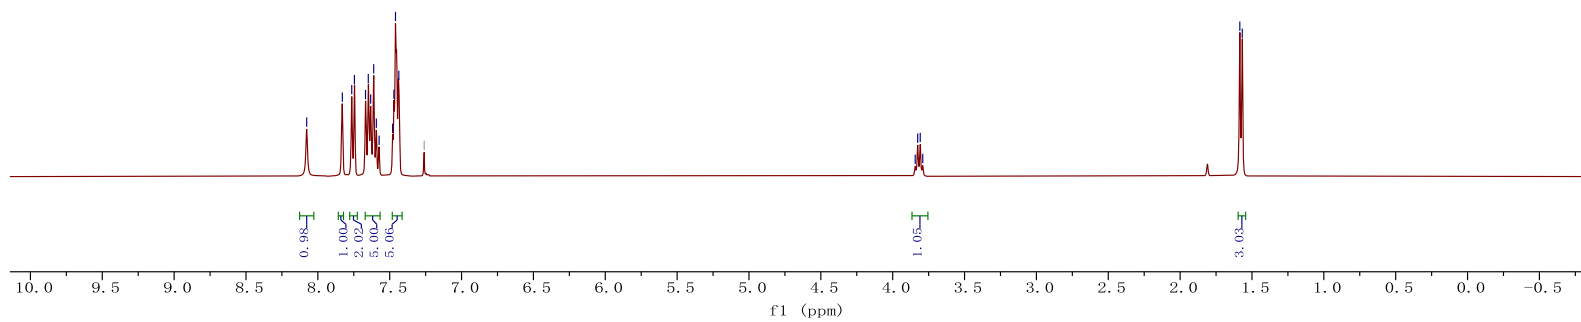

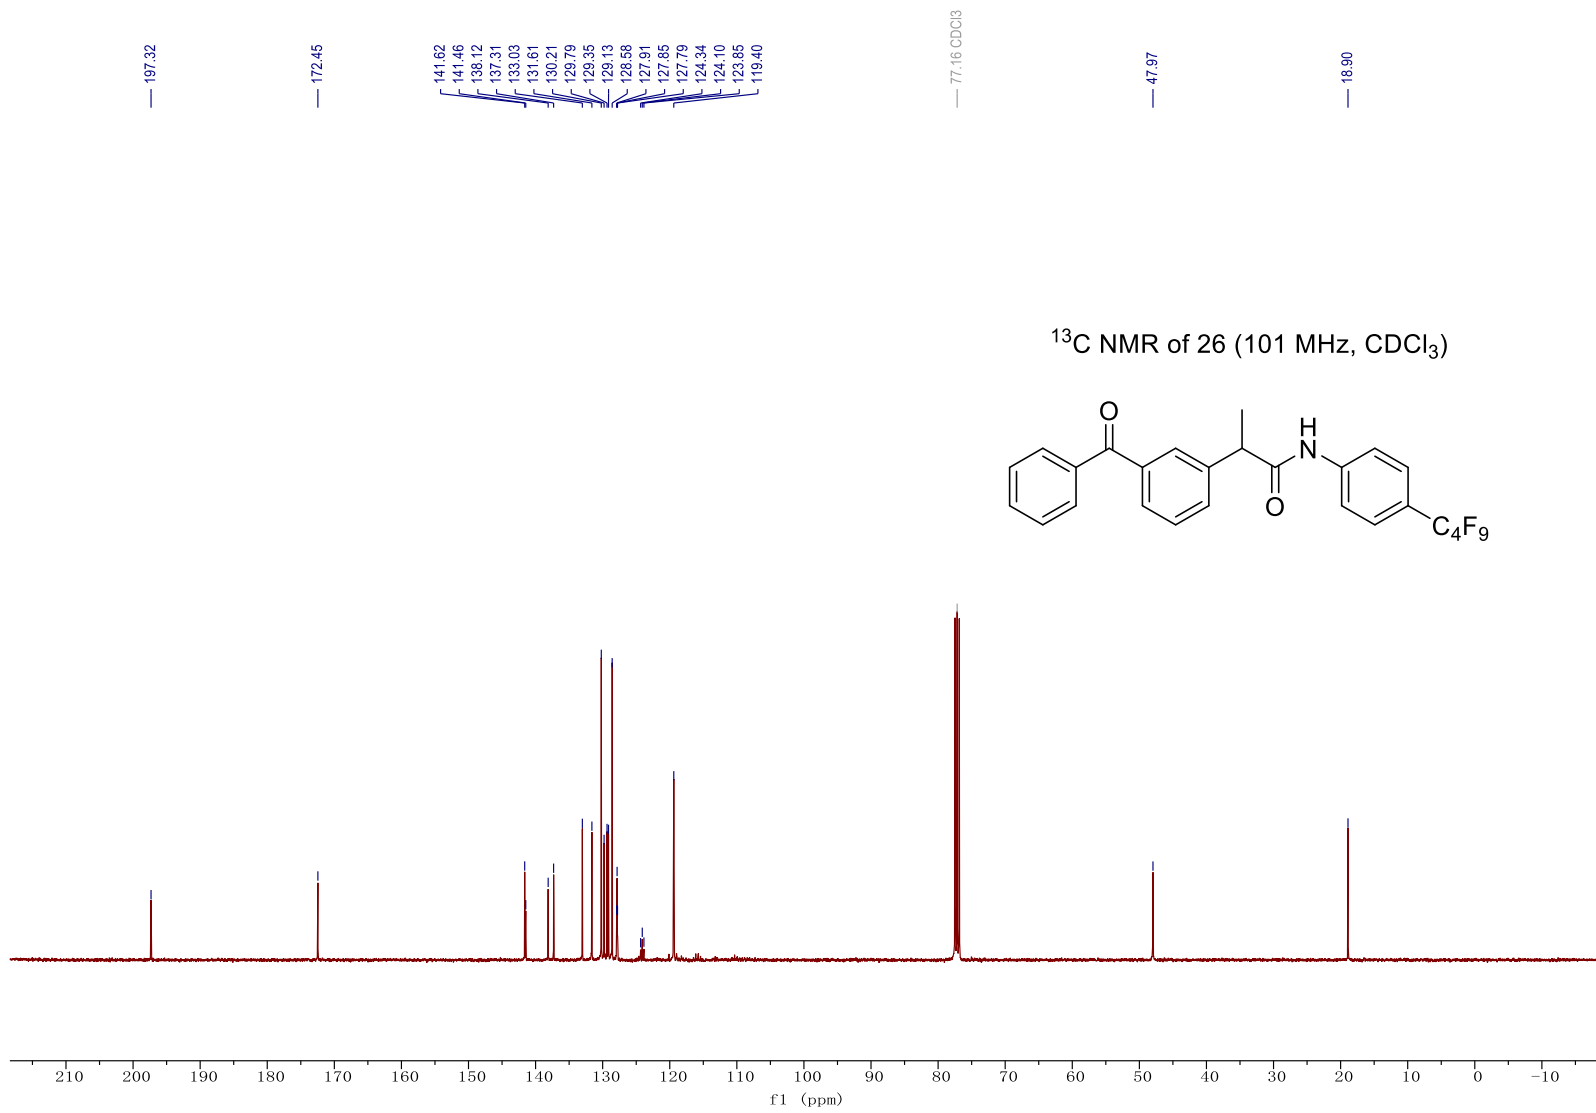

-81.08  
-81.11  
-81.11  
-81.13

-110.58  
-110.61  
-110.65  
-122.82  
-122.84  
-122.87  
-122.90  
-125.59  
-125.62  
-125.63  
-125.66

<sup>19</sup>F NMR of 26 (376 MHz, CDCl<sub>3</sub>)

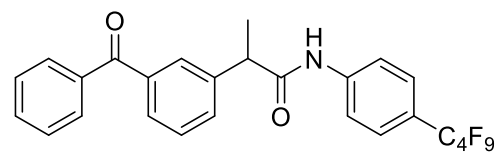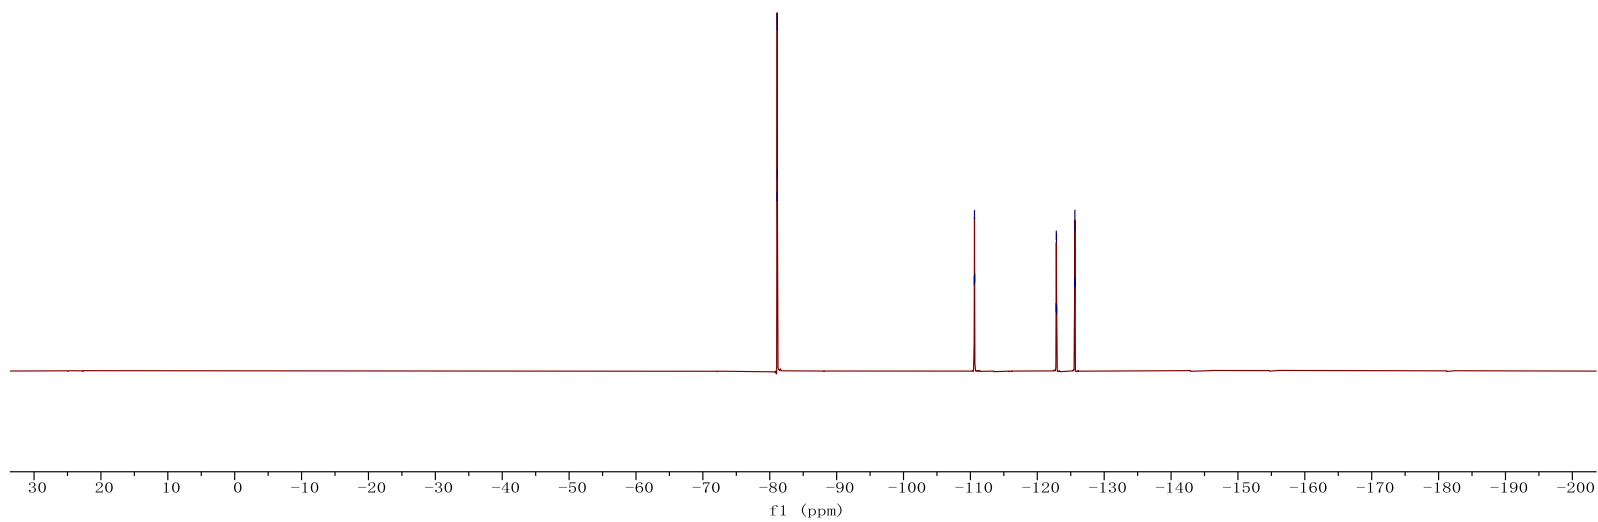

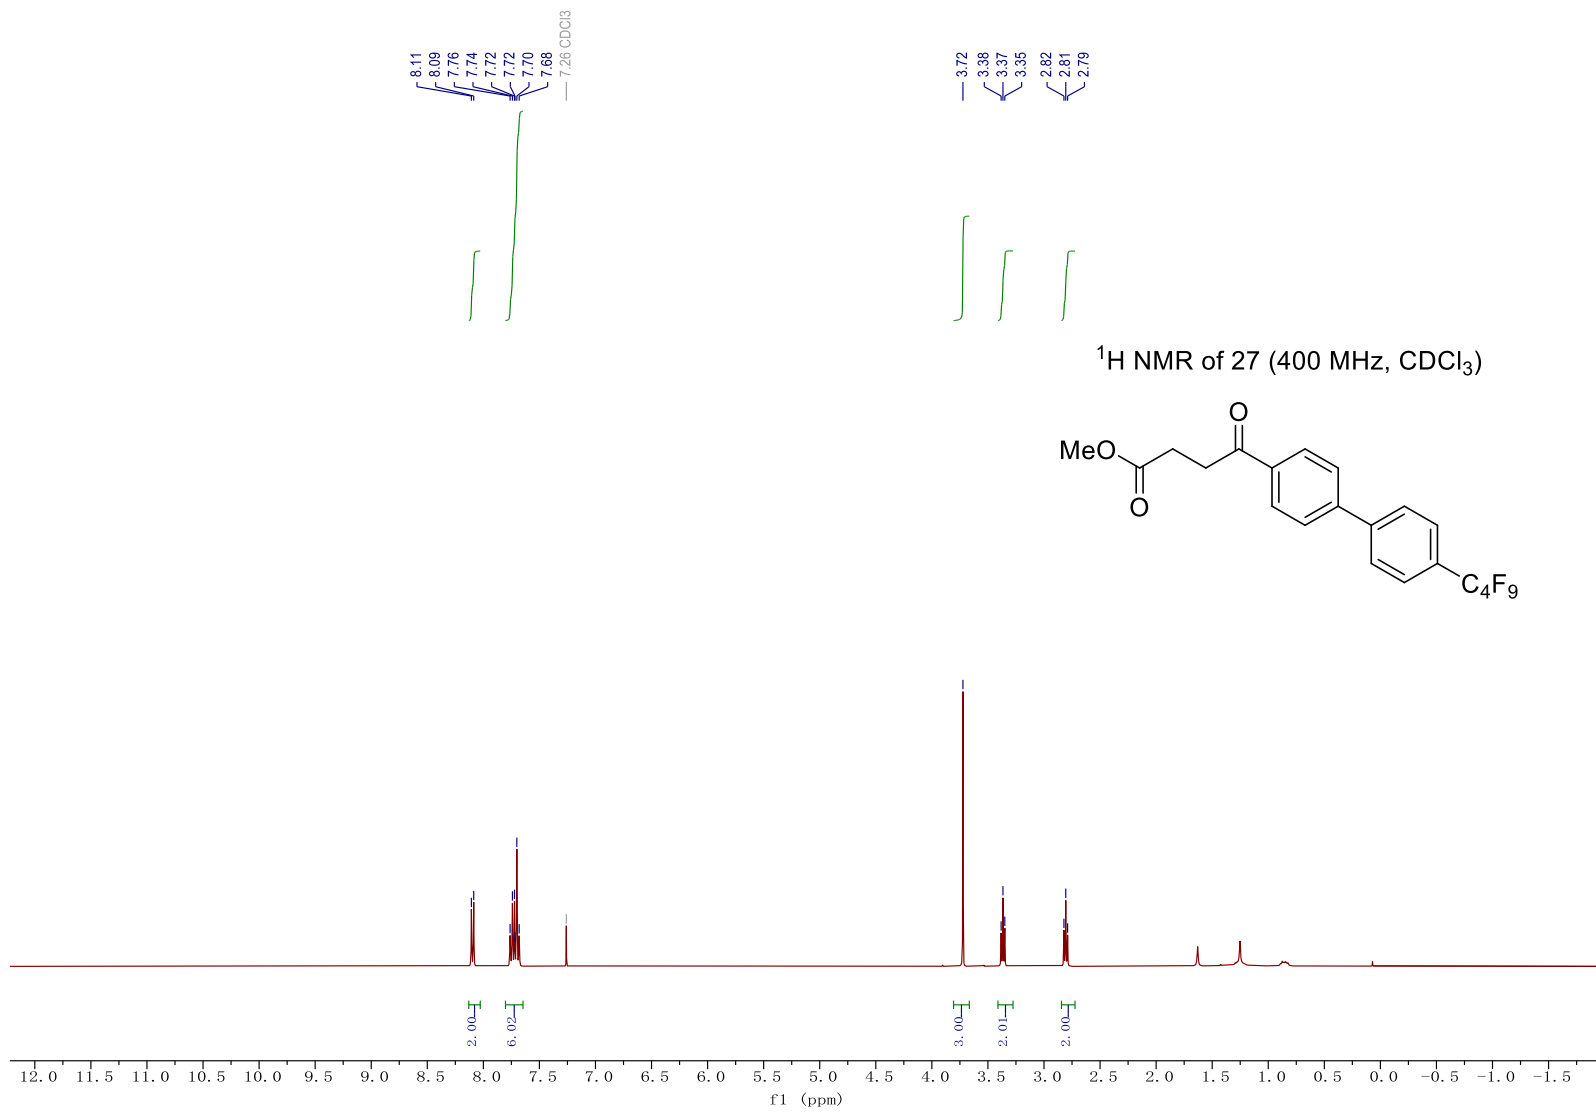

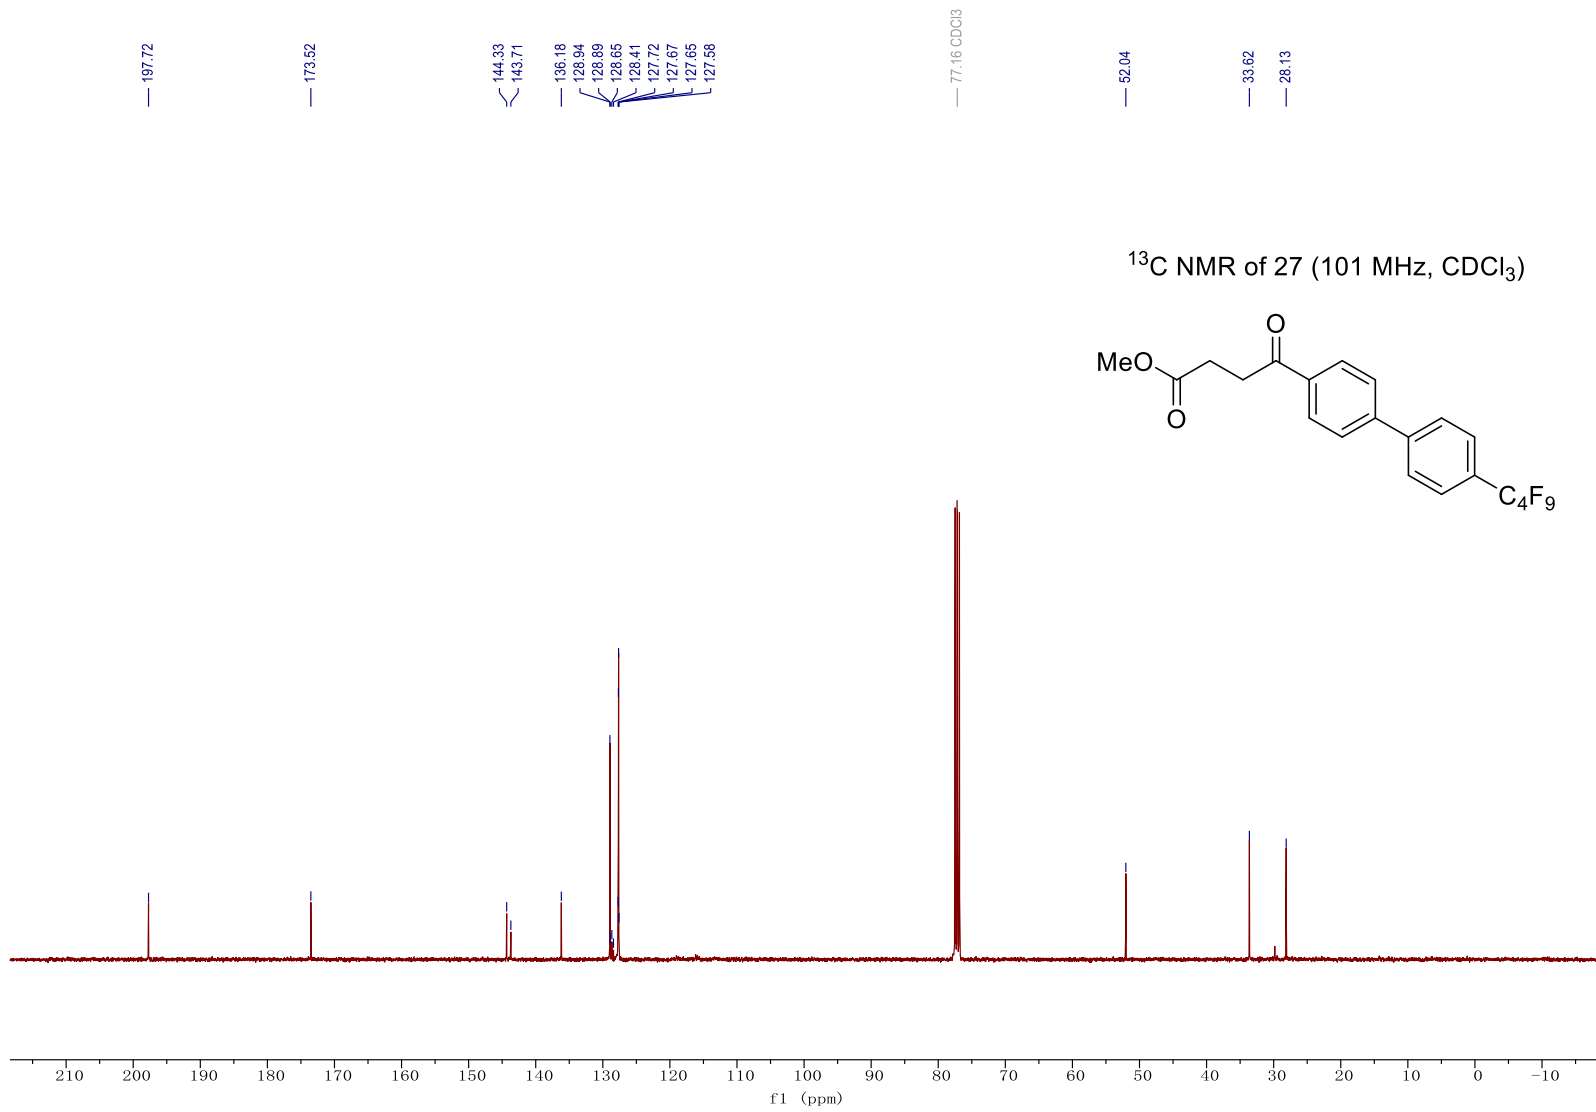

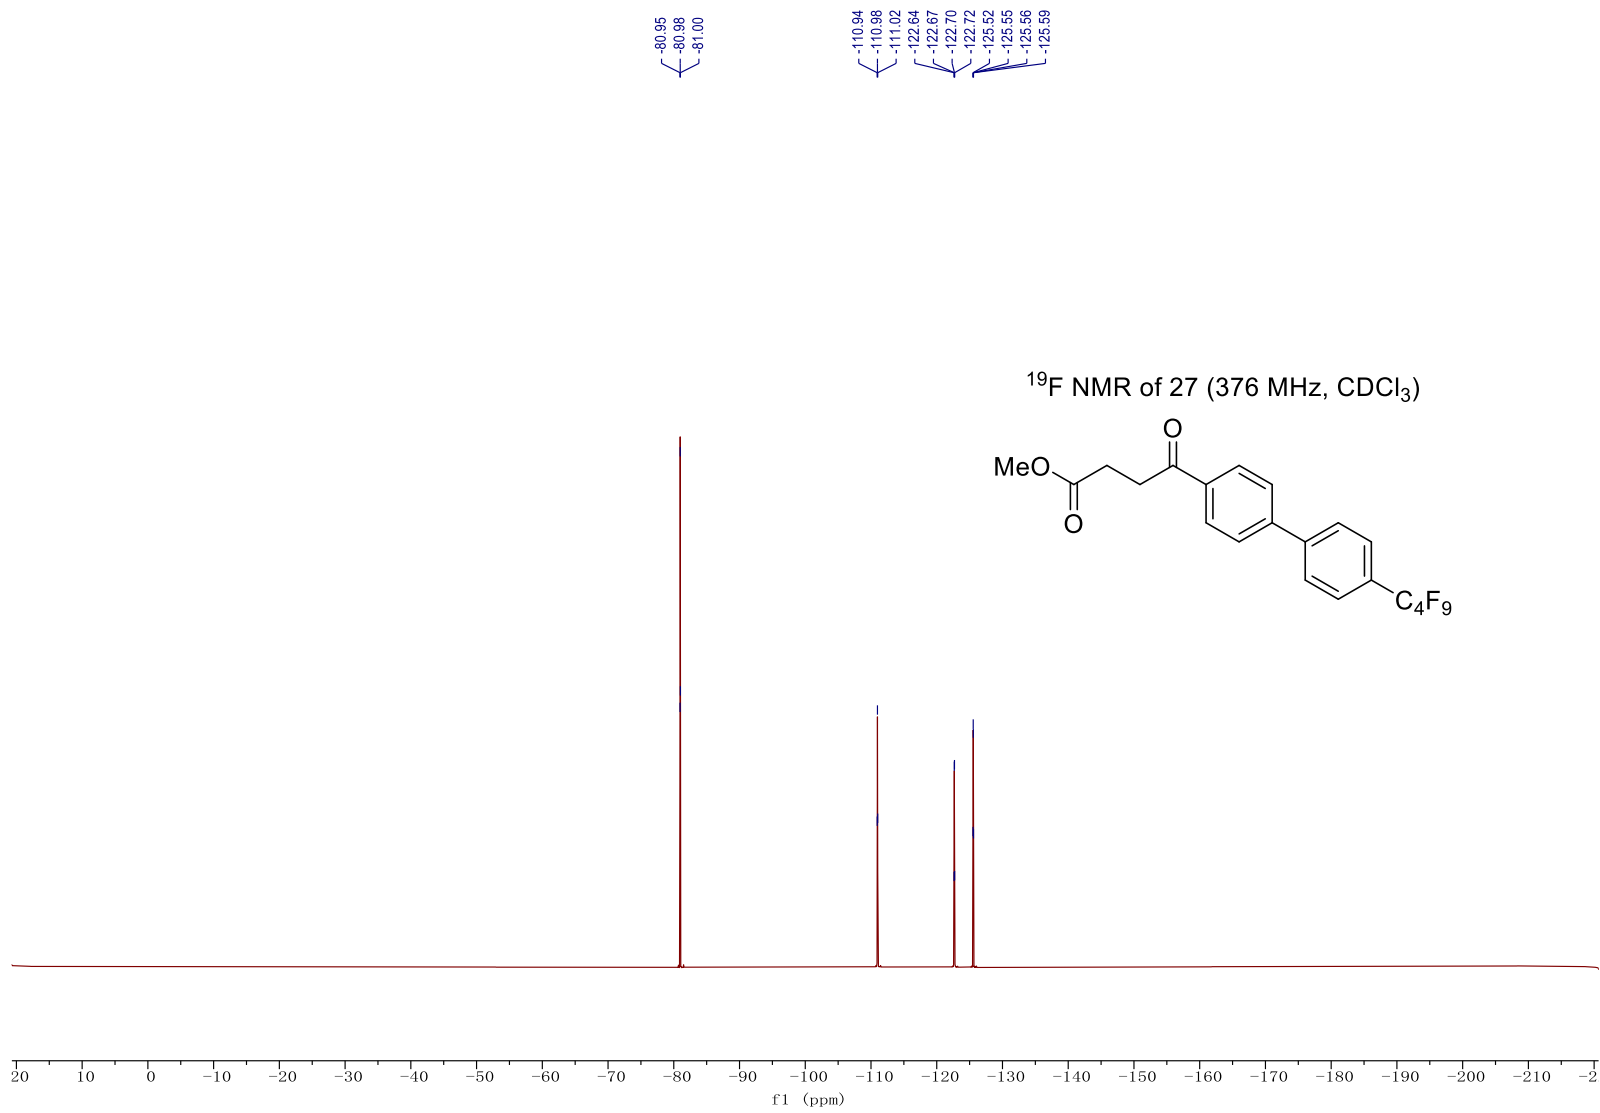

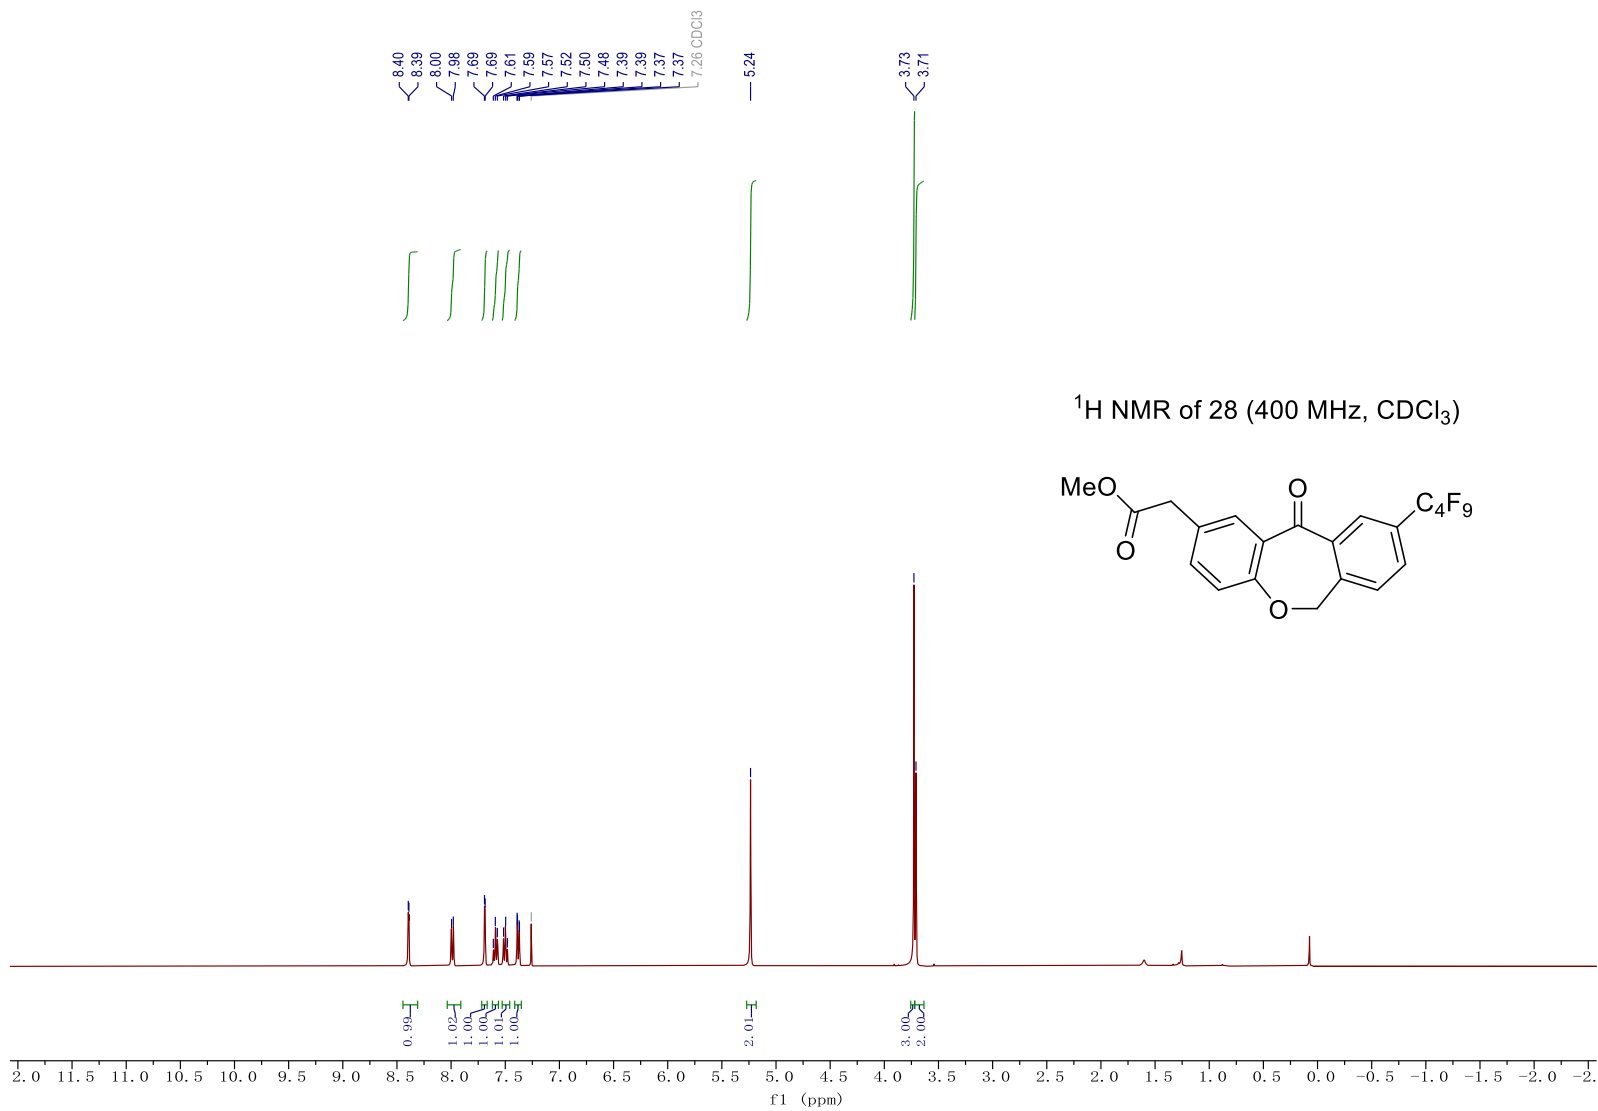

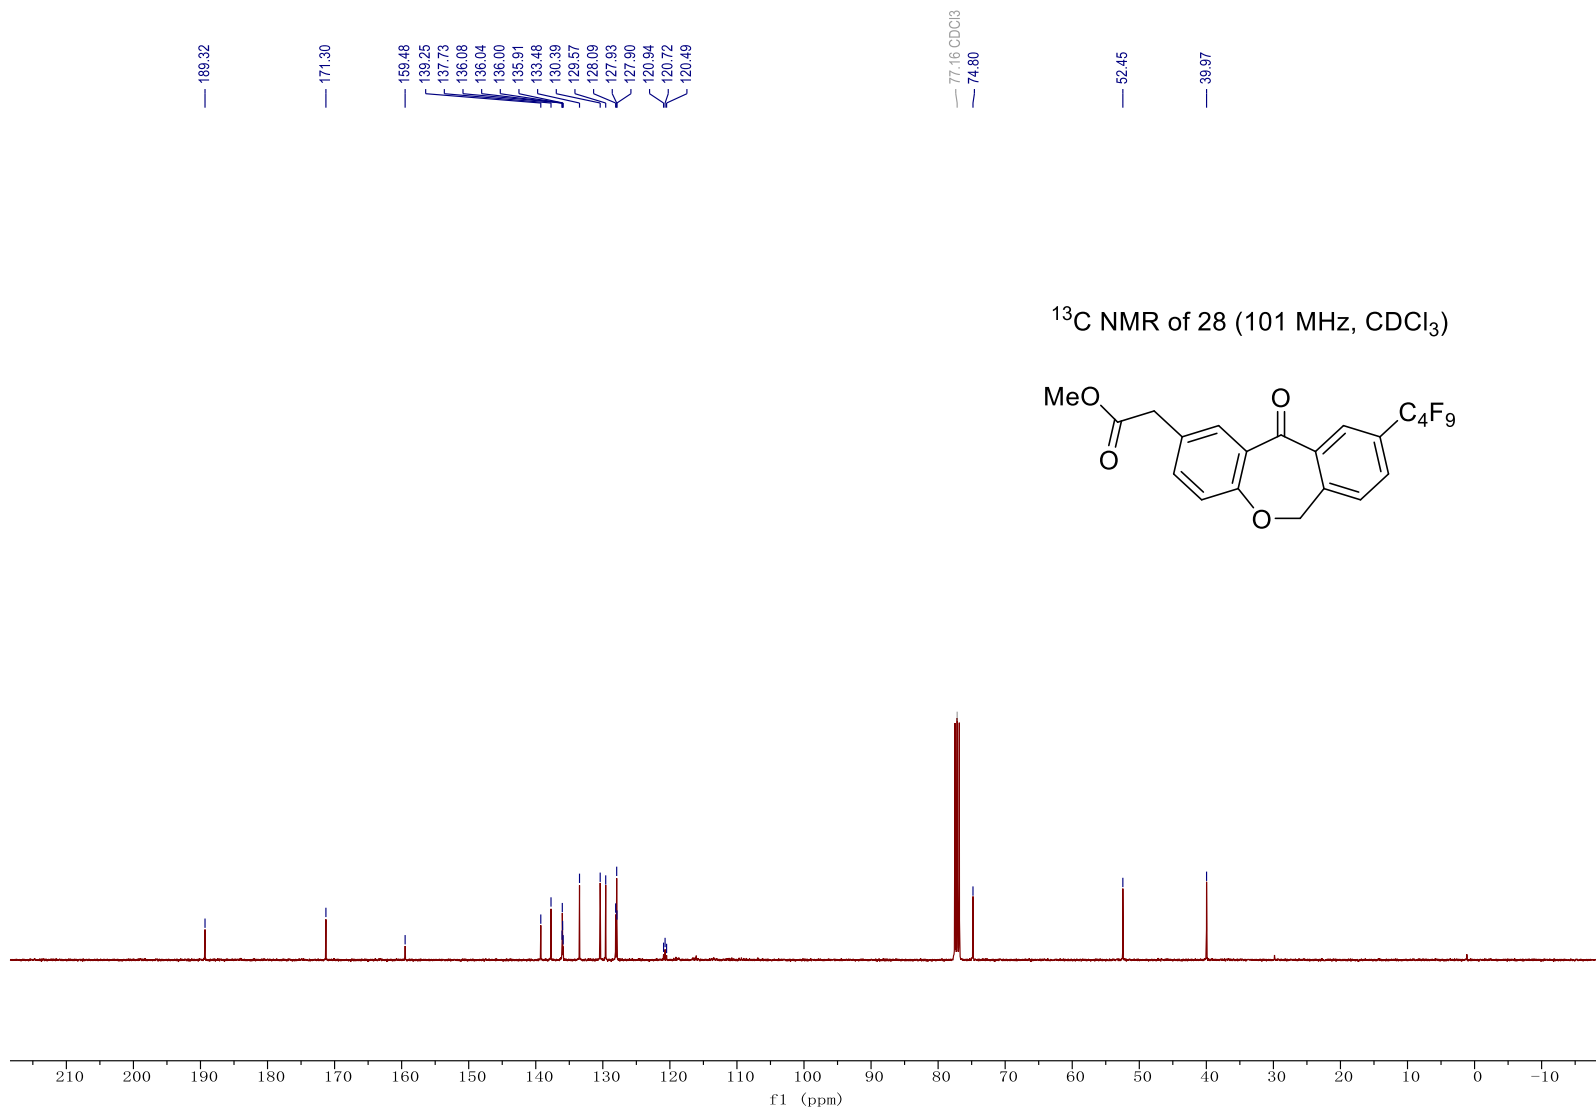

-80.82  
-80.84  
-80.87

-106.72  
-106.75  
-106.79  
-121.50  
-121.52  
-121.55  
-121.58  
-125.88  
-125.89  
-125.91  
-125.95

<sup>19</sup>F NMR of 28 (376 MHz, CDCl<sub>3</sub>)

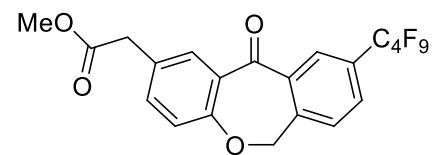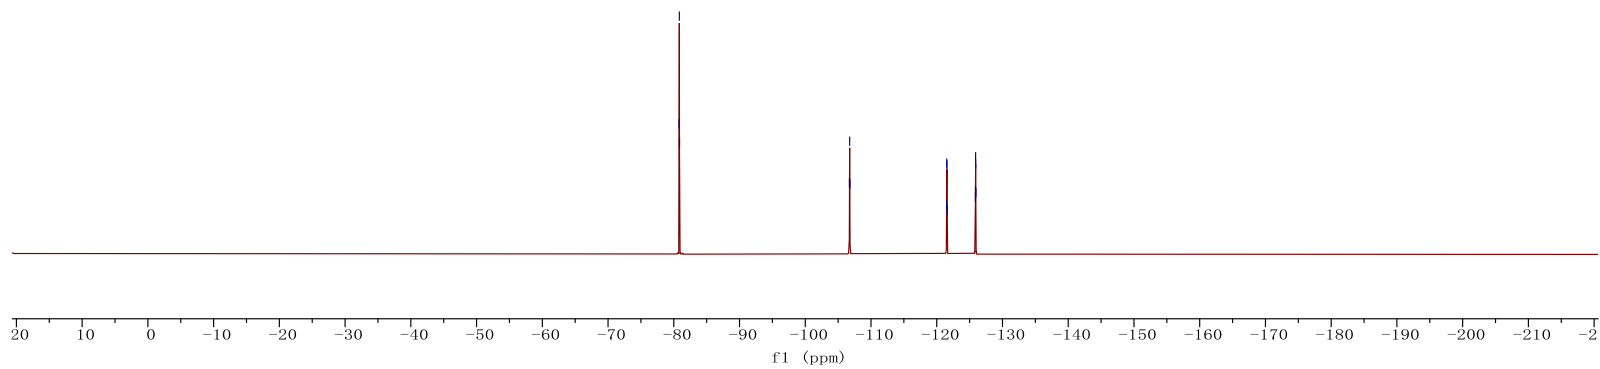

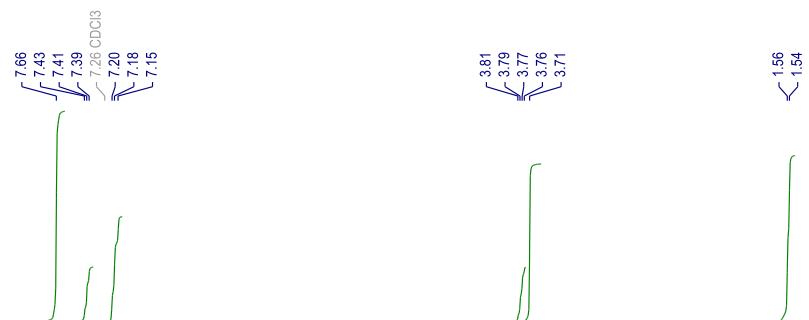

<sup>1</sup>H NMR of 29 (400 MHz, CDCl<sub>3</sub>)

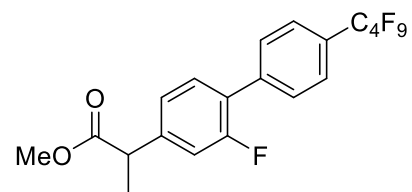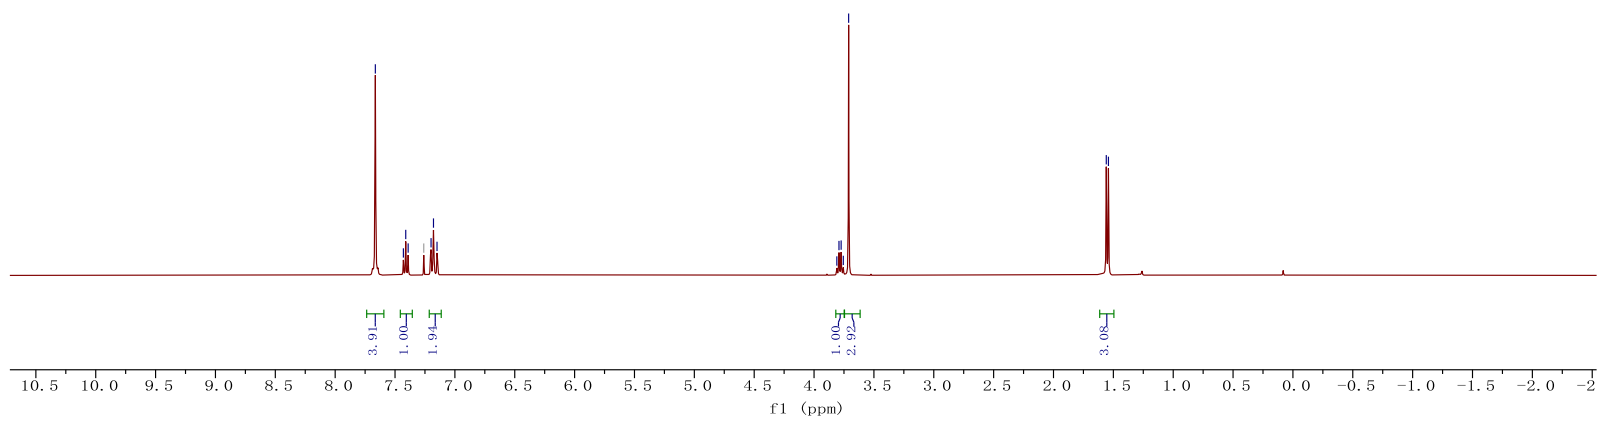

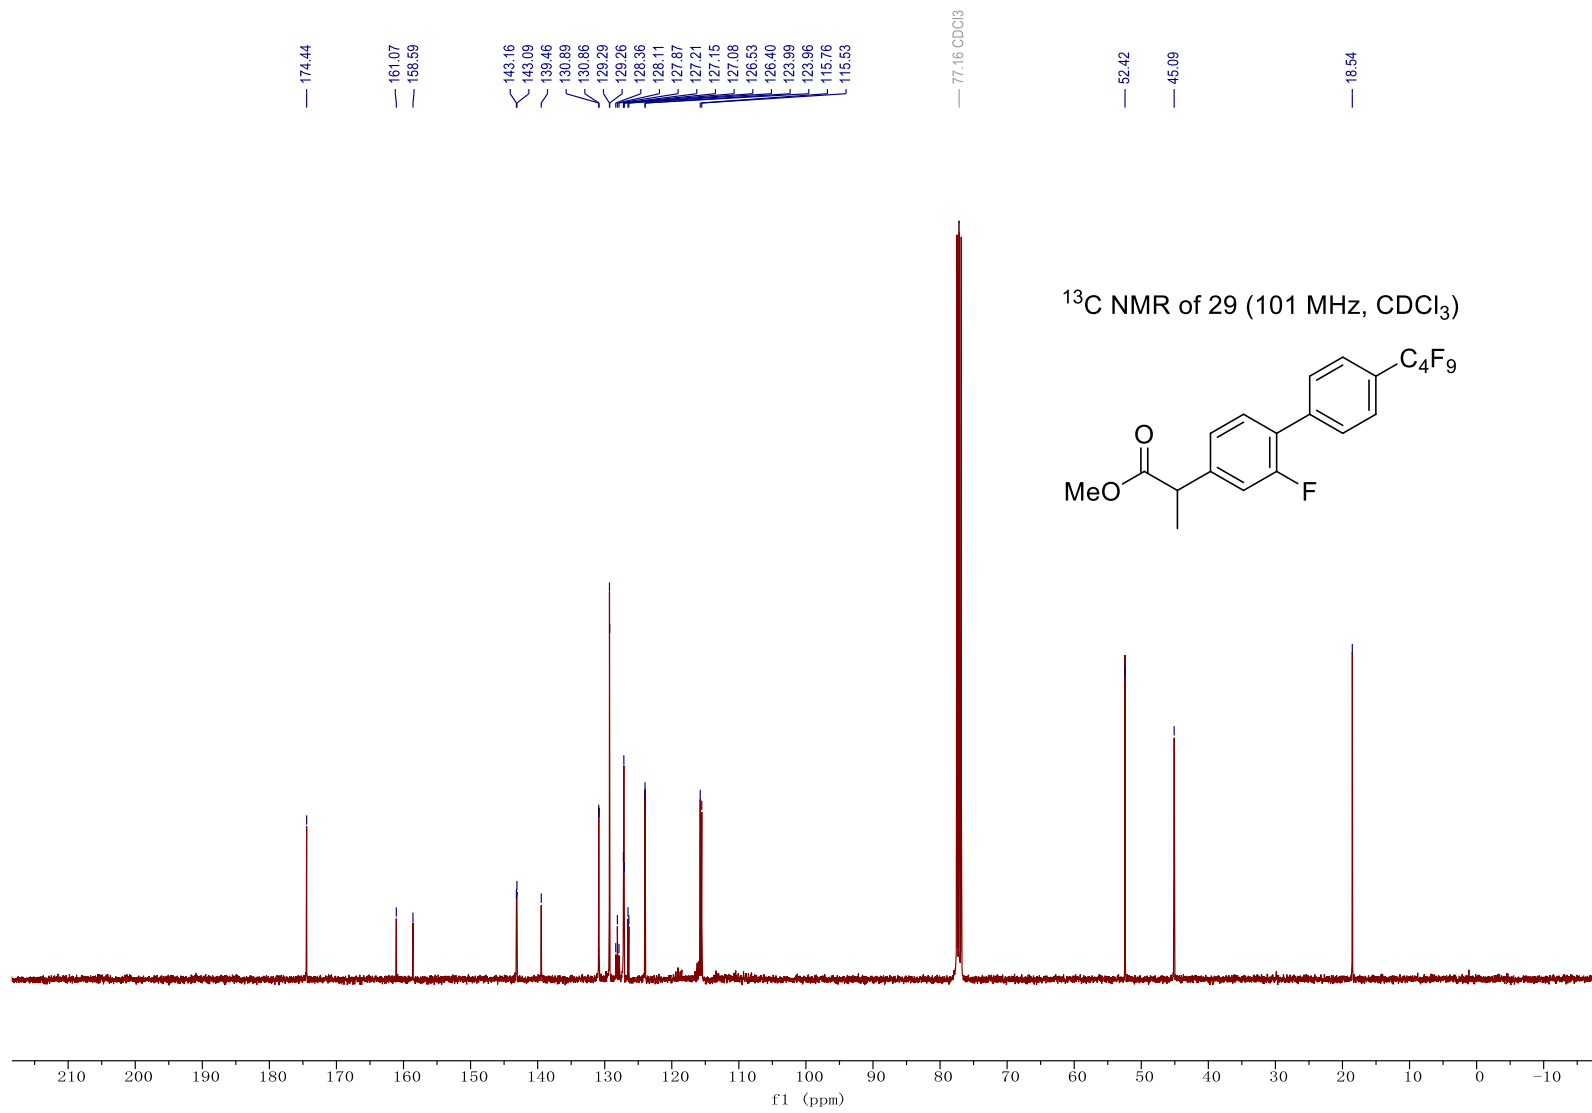

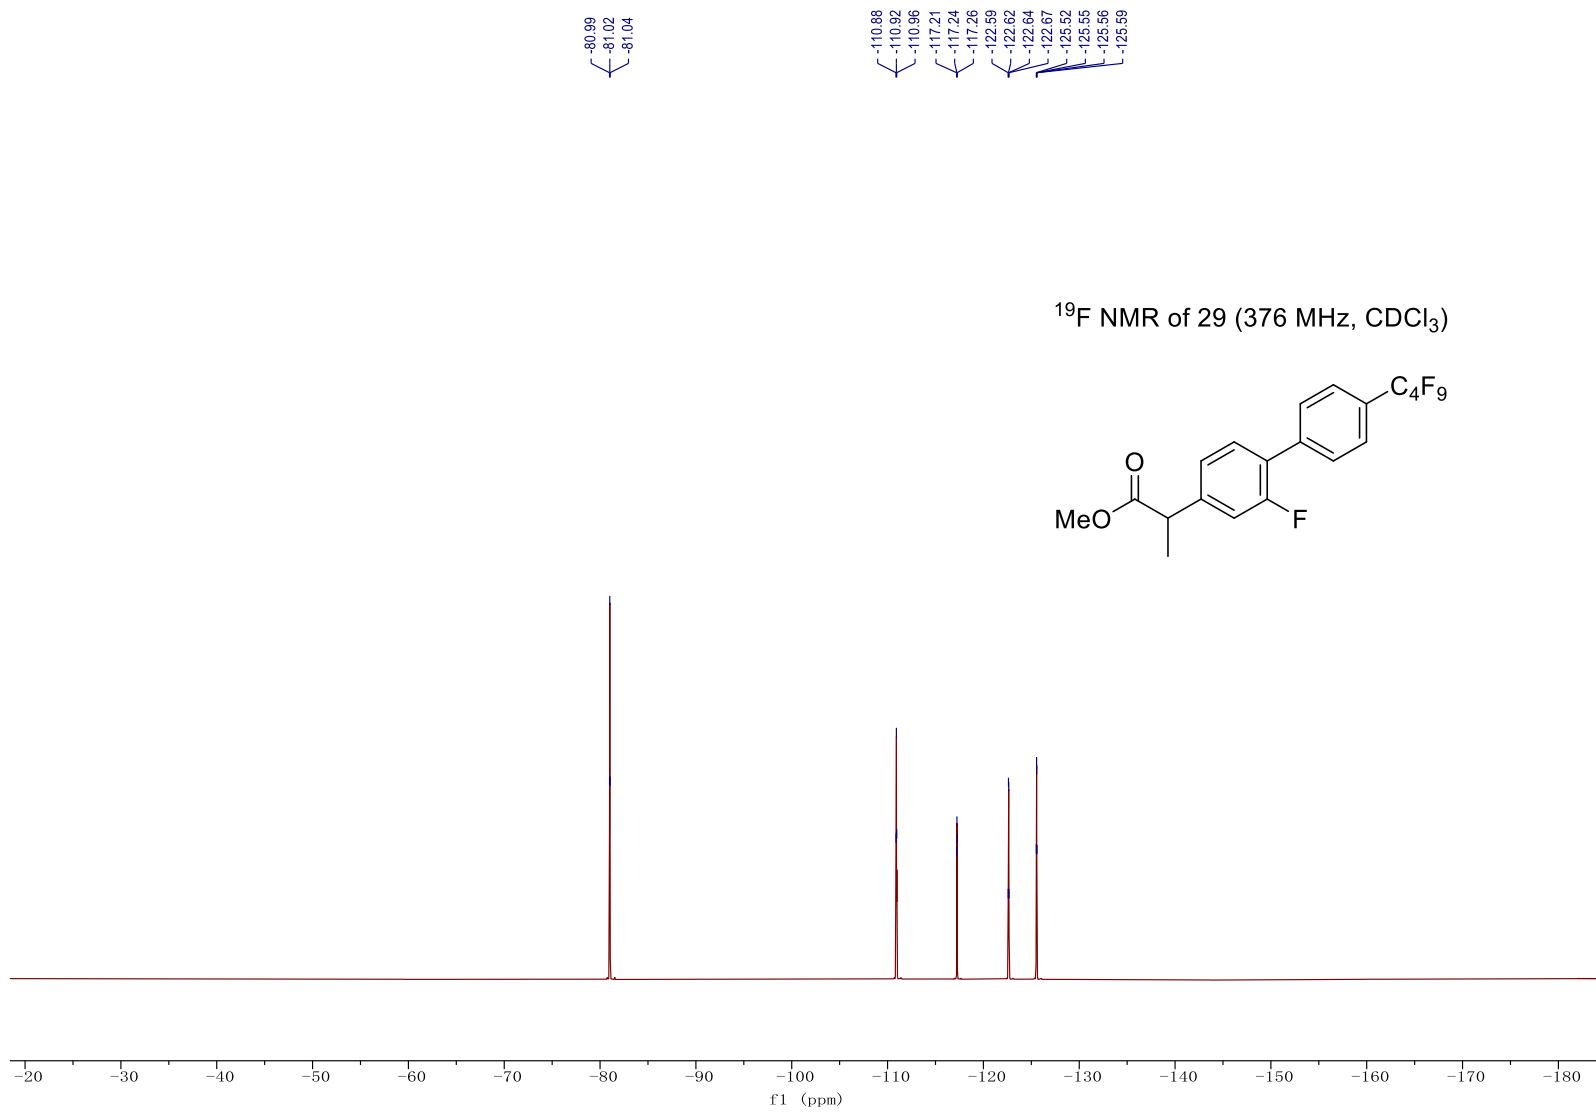

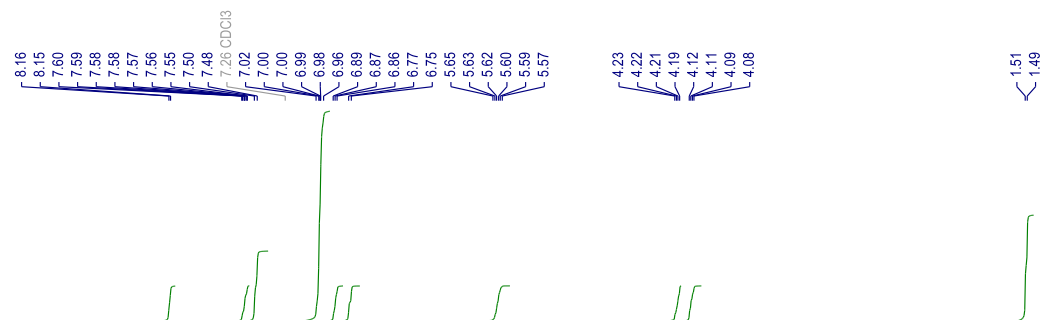

$^1\text{H}$  NMR of 30 (400 MHz,  $\text{CDCl}_3$ )

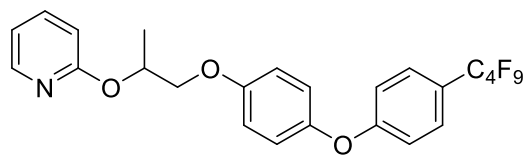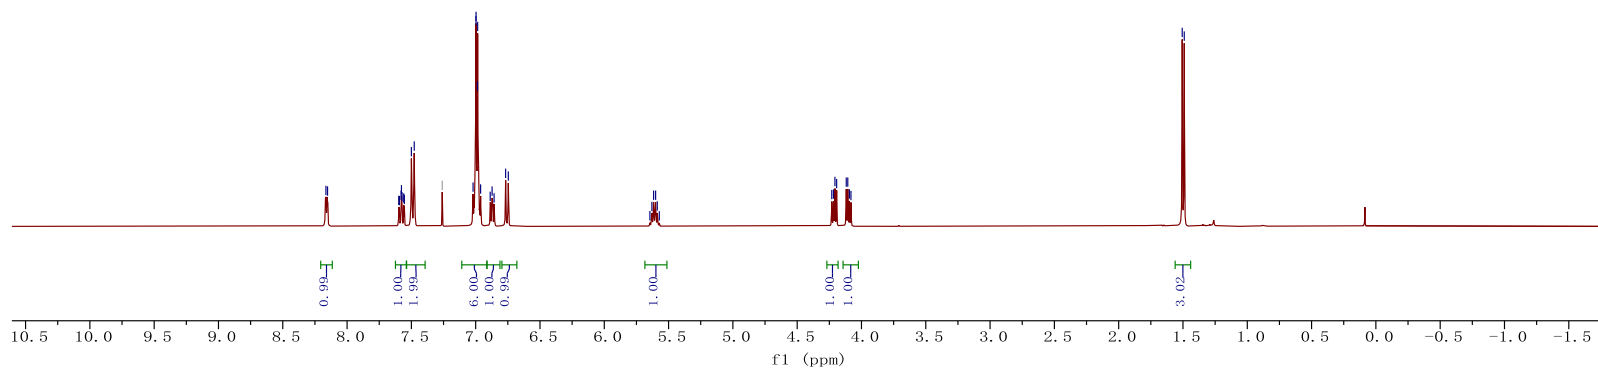

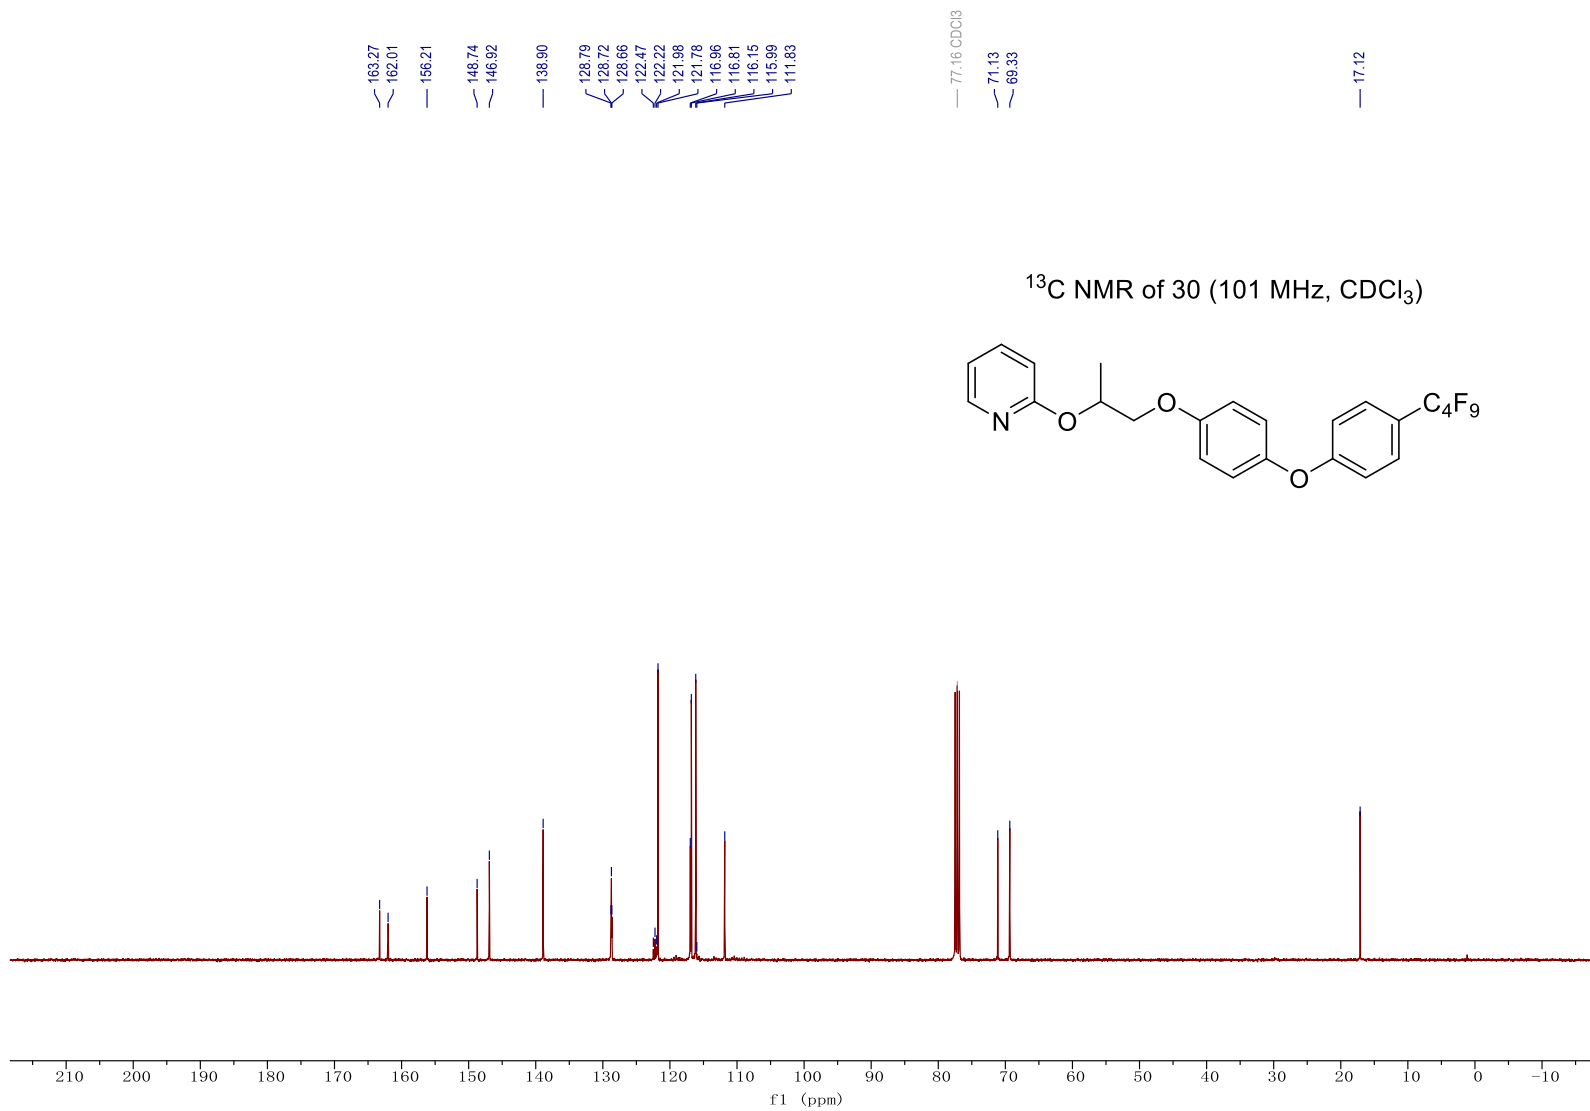

-81.01  
-81.04  
-81.06

-110.05  
-110.09  
-110.12  
-122.76  
-122.78  
-122.81  
-122.84  
-125.61  
-125.64  
-125.65  
-125.68

$^{19}\text{F}$  NMR of 30 (376 MHz,  $\text{CDCl}_3$ )

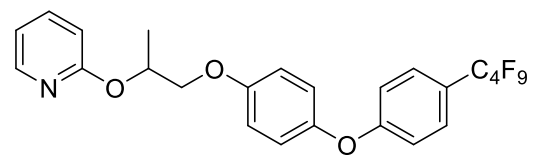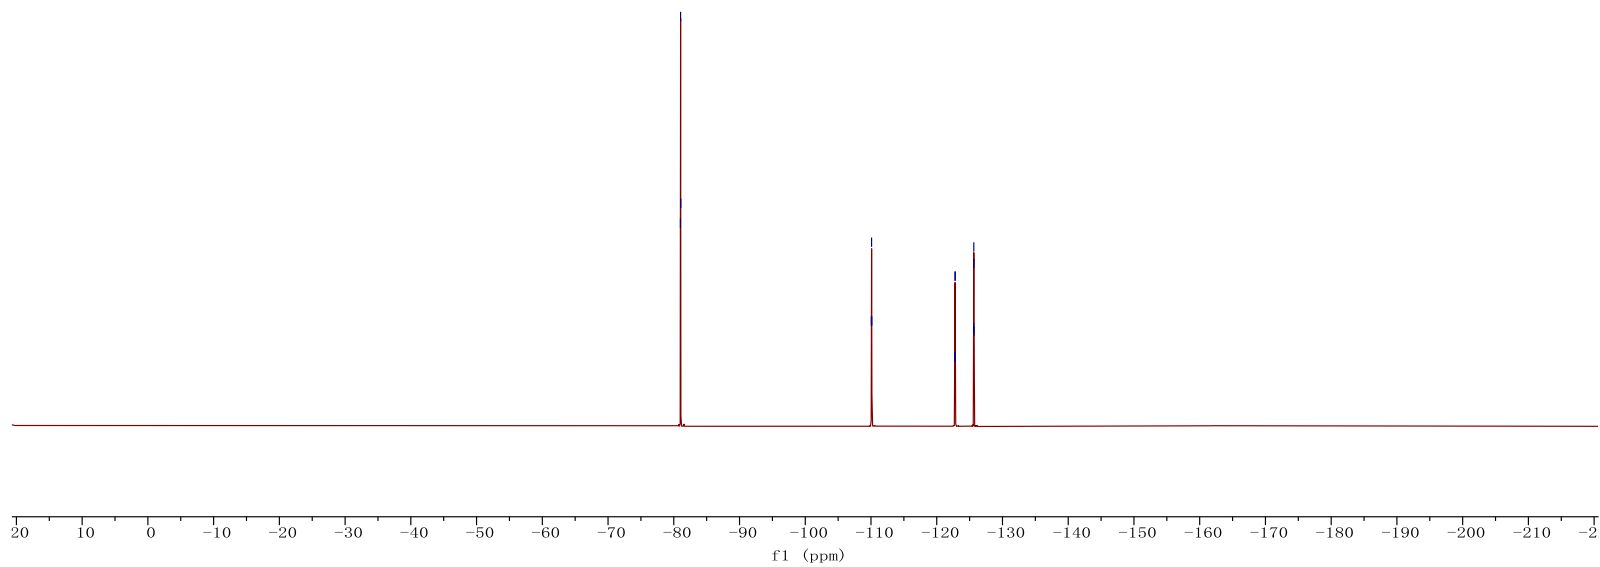

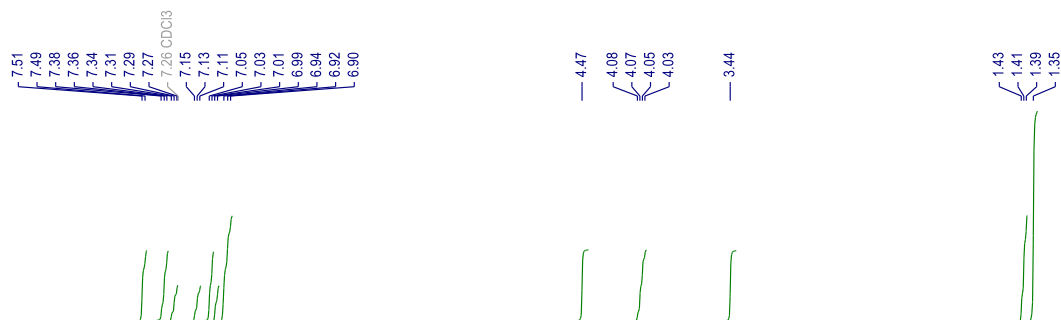

$^1\text{H}$  NMR of 31 (400 MHz, CDCl<sub>3</sub>)

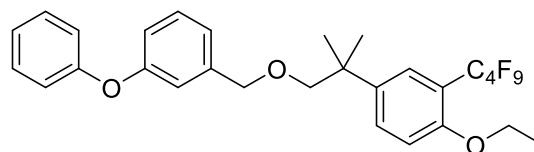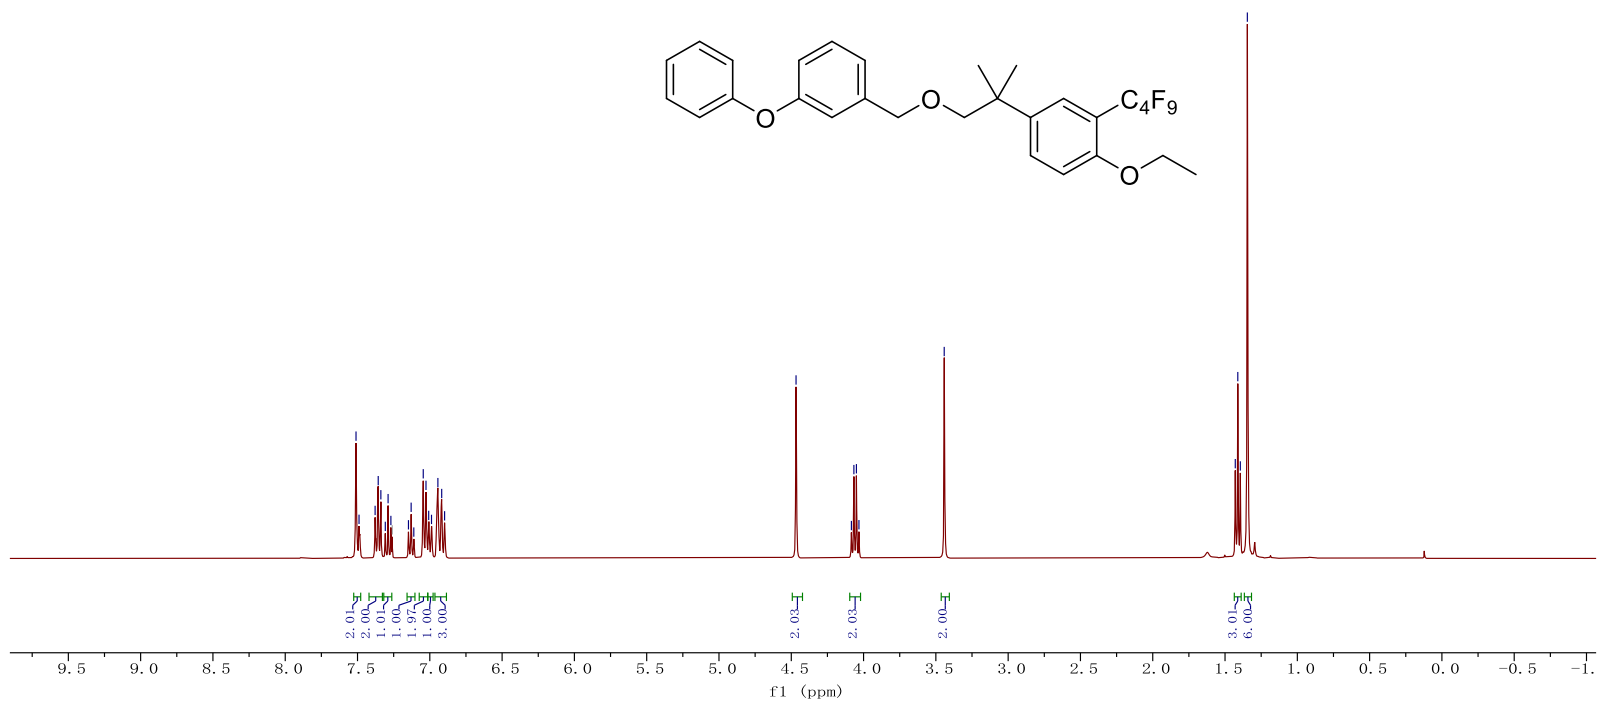

157.49  
 157.31  
 156.14  
 156.12  
 156.09  
 140.87  
 139.43  
 131.37  
 129.86  
 129.74  
 126.94  
 126.85  
 126.76  
 123.40  
 122.10  
 119.22  
 119.10  
 117.87  
 117.68  
 116.65  
 116.42  
 116.35  
 116.20  
 112.97  
 80.03  
 77.16 CDCl<sub>3</sub>  
 72.90  
 64.56  
 38.73  
 26.18  
 14.60

<sup>13</sup>C NMR of 31 (101 MHz, CDCl<sub>3</sub>)

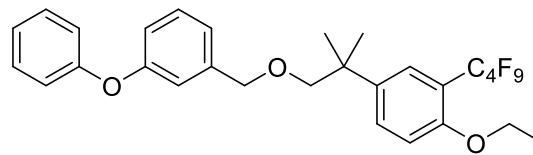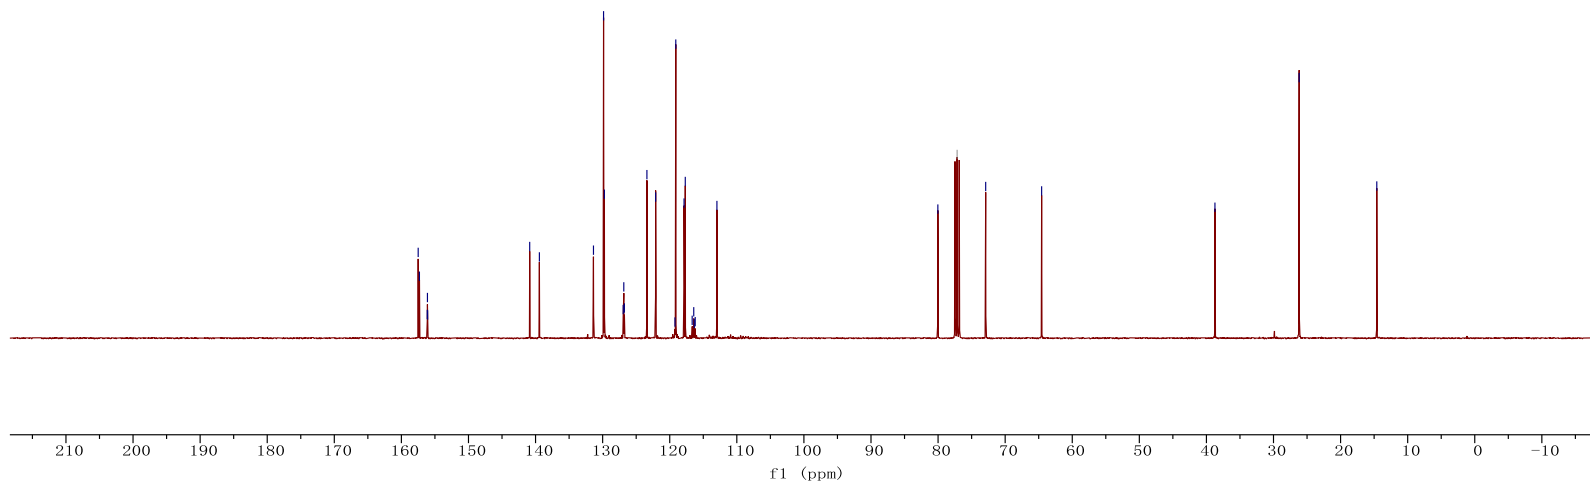

-80.88  
-80.90  
-80.93

-107.53  
-107.57  
-107.60  
-121.75  
-121.78  
-121.80  
-121.83  
-121.85  
-121.88  
-126.01  
-126.02  
-126.05  
-126.06  
-126.09

$^{19}\text{F}$  NMR of 31 (376 MHz,  $\text{CDCl}_3$ )

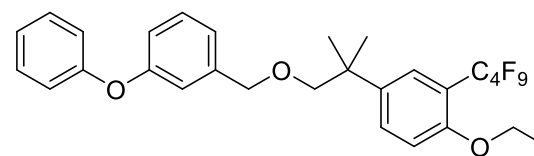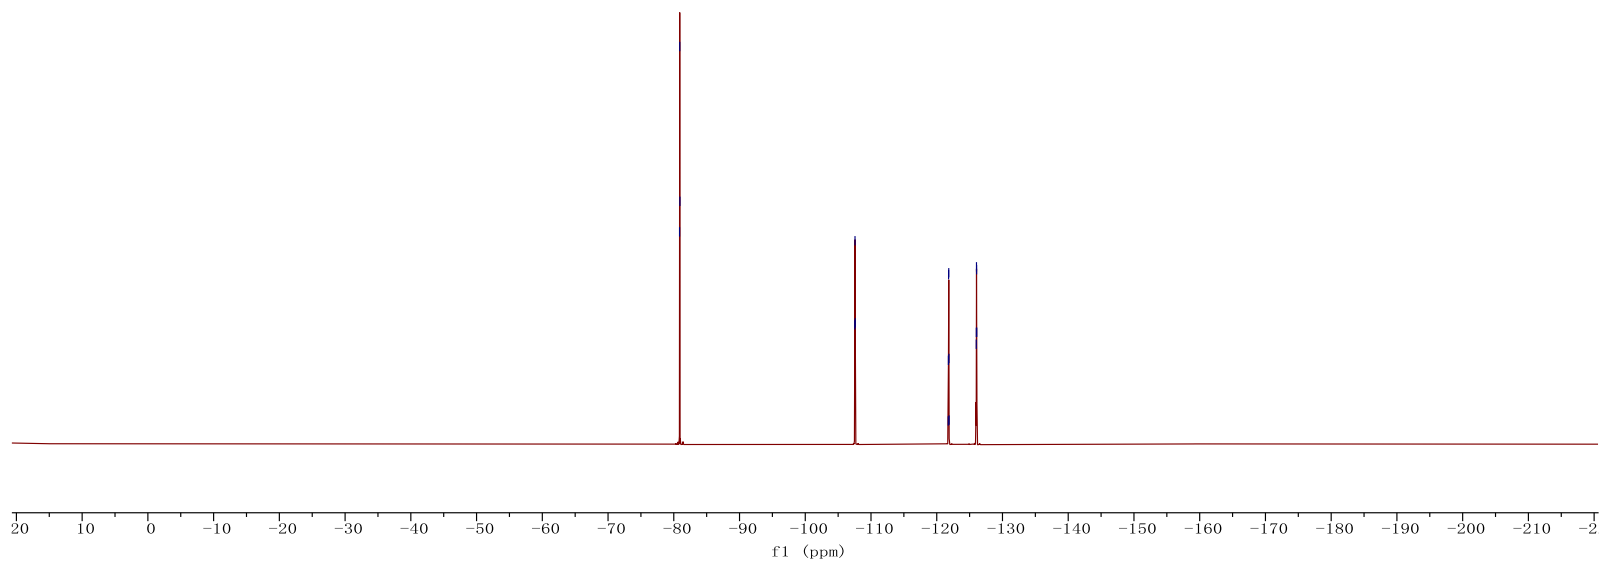

S121

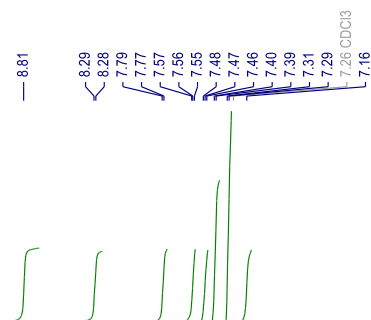

<sup>1</sup>H NMR of 32 (400 MHz, CDCl<sub>3</sub>)

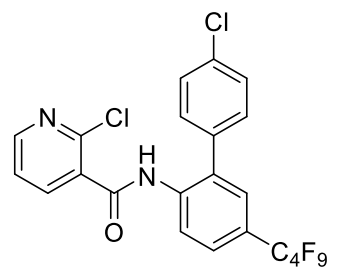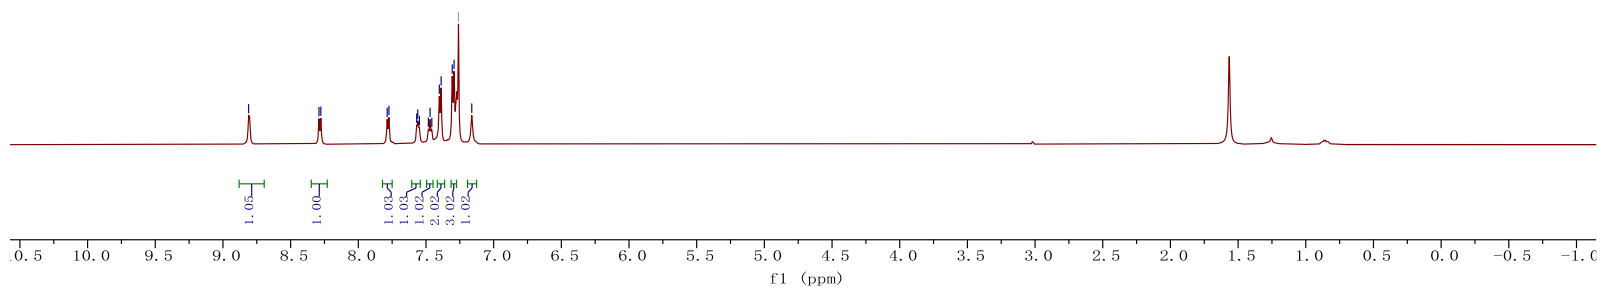

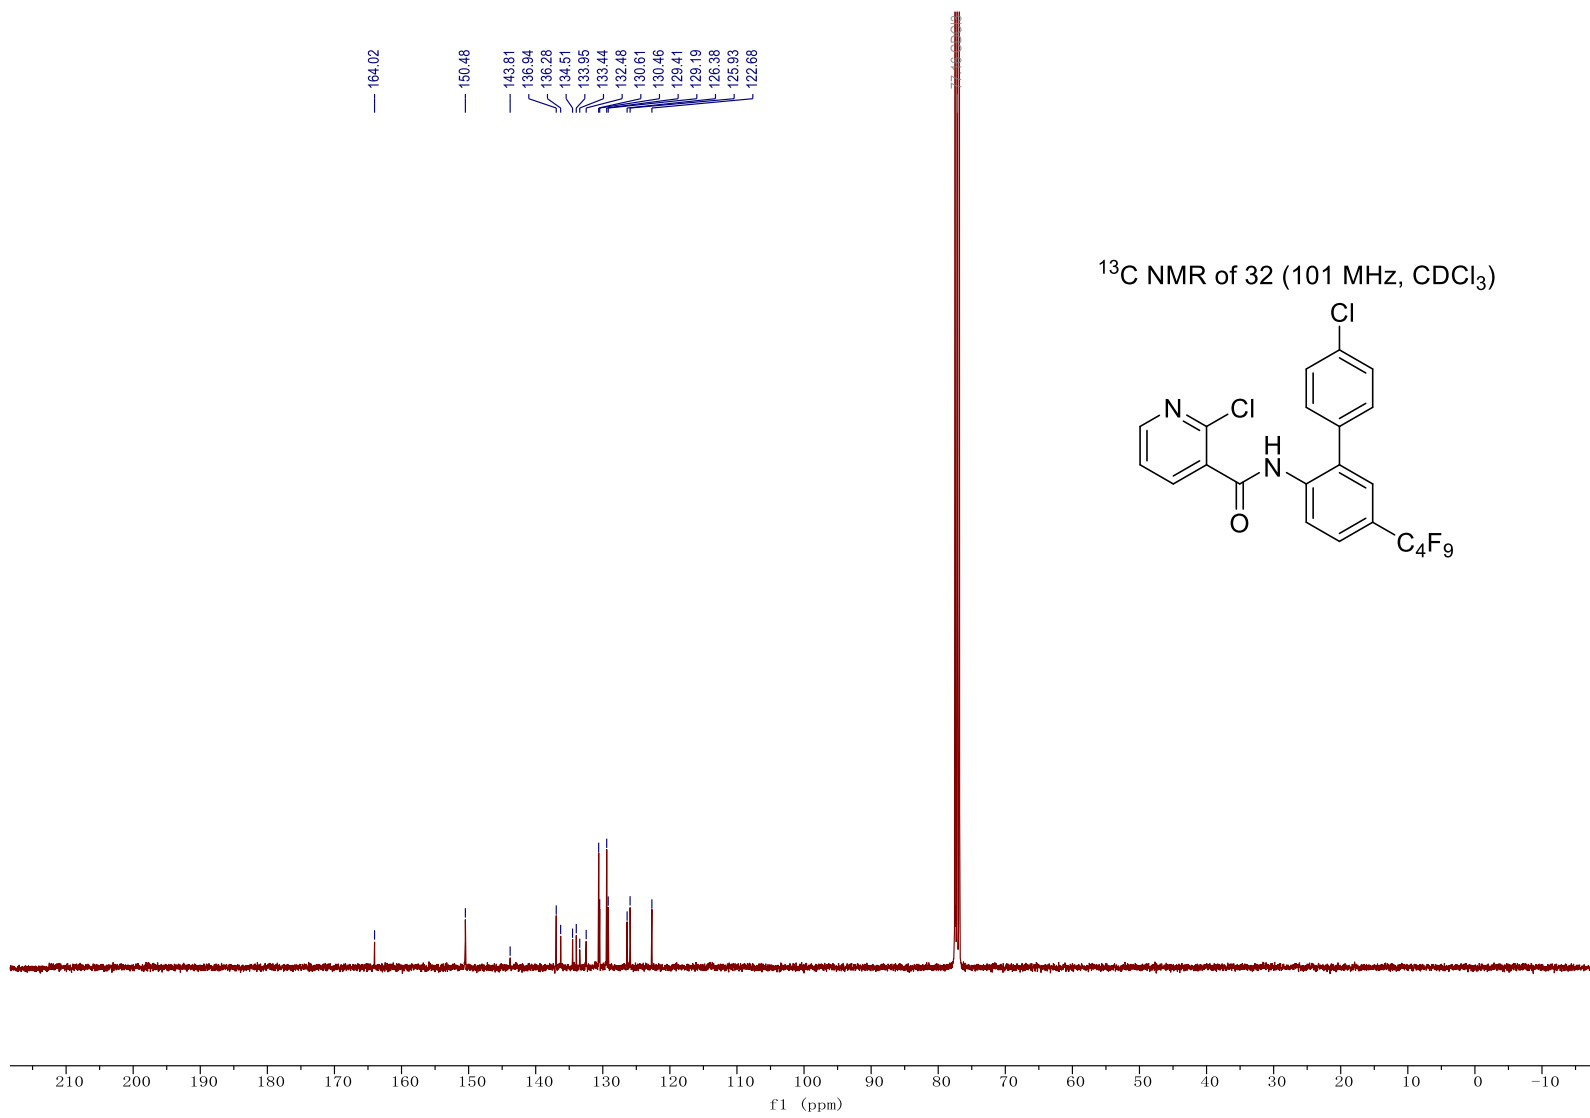

-80.81  
-80.83  
-80.85

-108.49  
-108.51  
-108.53  
-120.57  
-120.59  
-120.60  
-120.62  
-125.28  
-125.31  
-125.33

<sup>19</sup>F NMR of 32 (376 MHz, CDCl<sub>3</sub>)

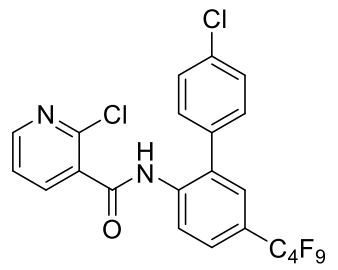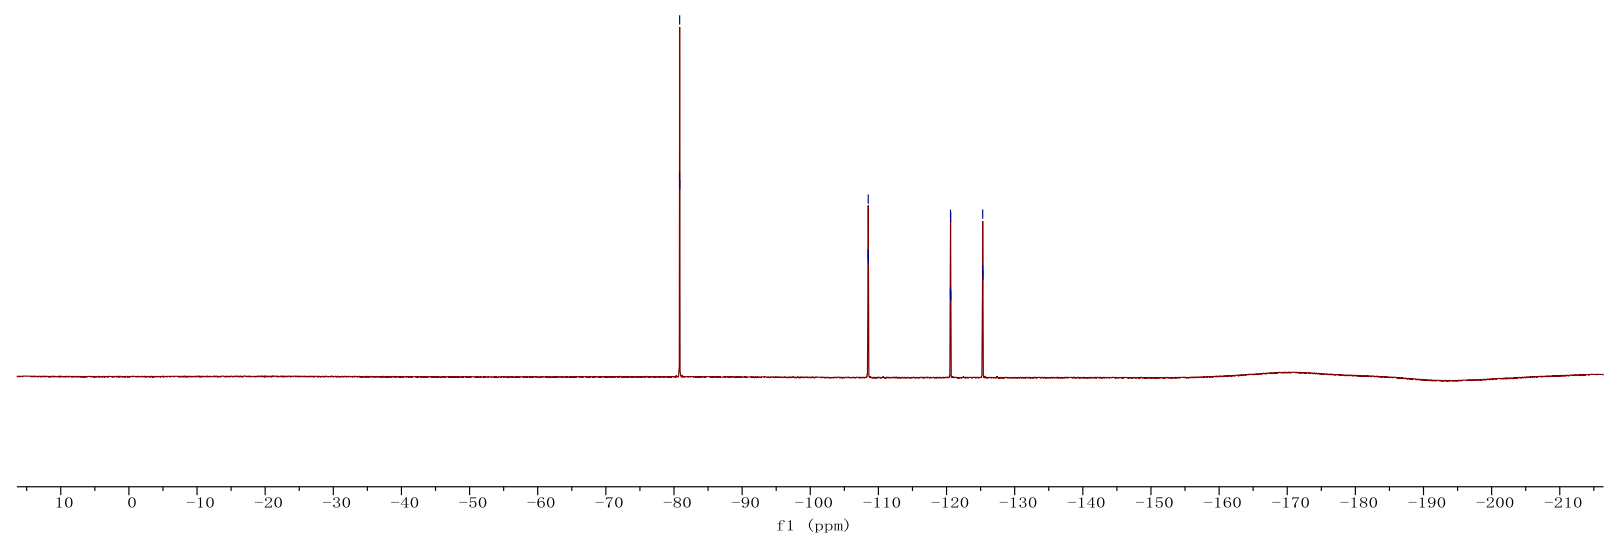

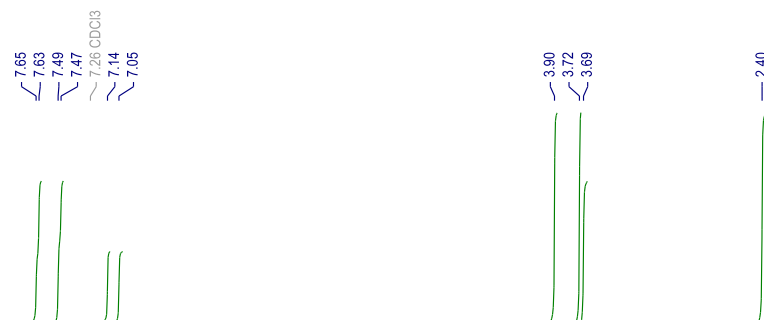

<sup>1</sup>H NMR of 33 (400 MHz, CDCl<sub>3</sub>)

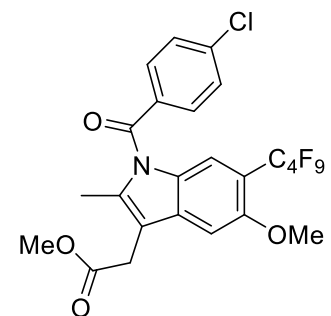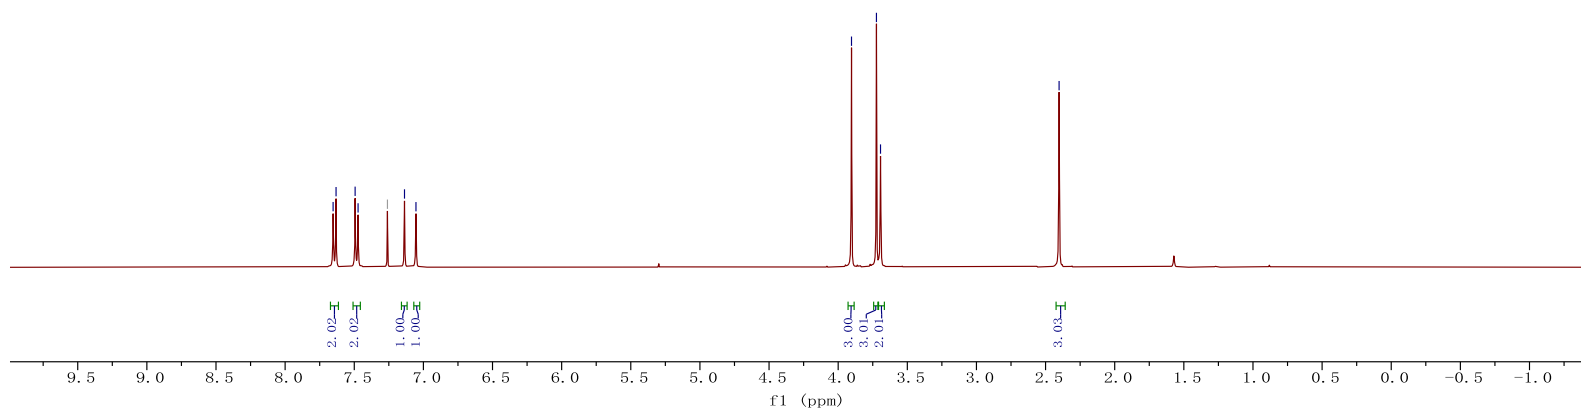

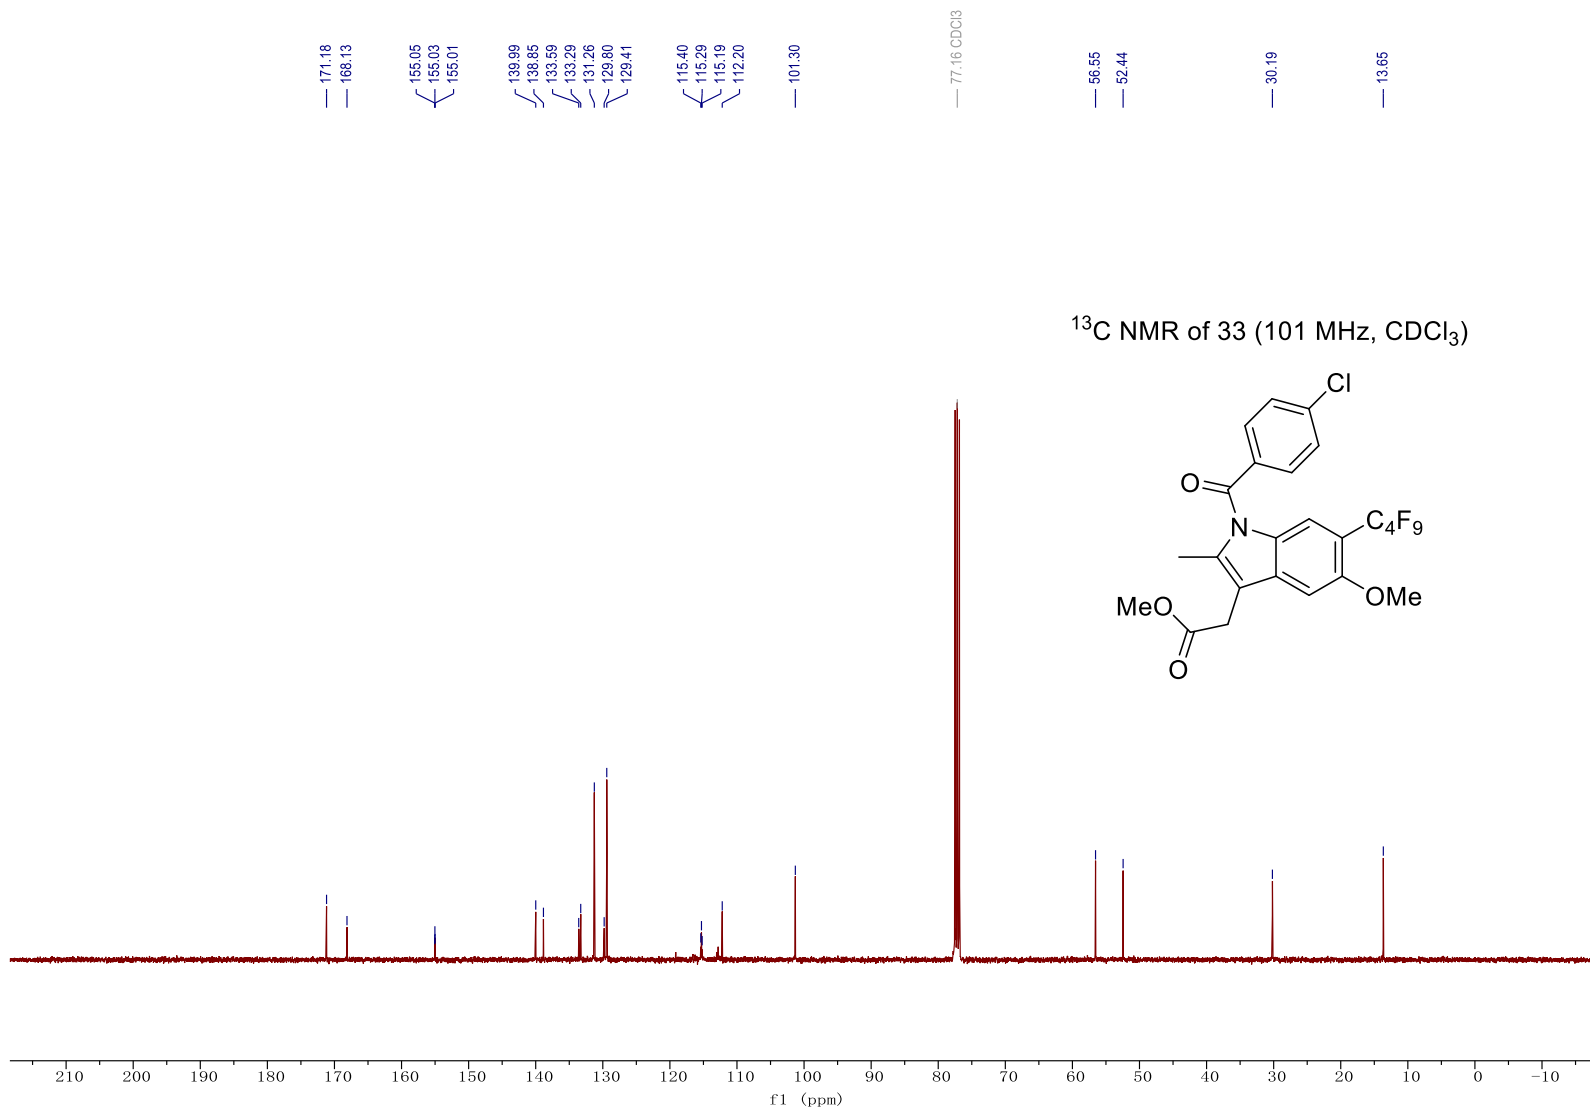

80.92  
80.94  
80.97

106.69  
106.73  
106.77

121.72  
121.74  
121.77  
121.80

126.00  
126.03  
126.04  
126.07

$^{19}\text{F}$  NMR of 33 (376 MHz,  $\text{CDCl}_3$ )

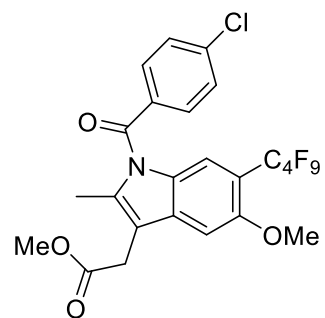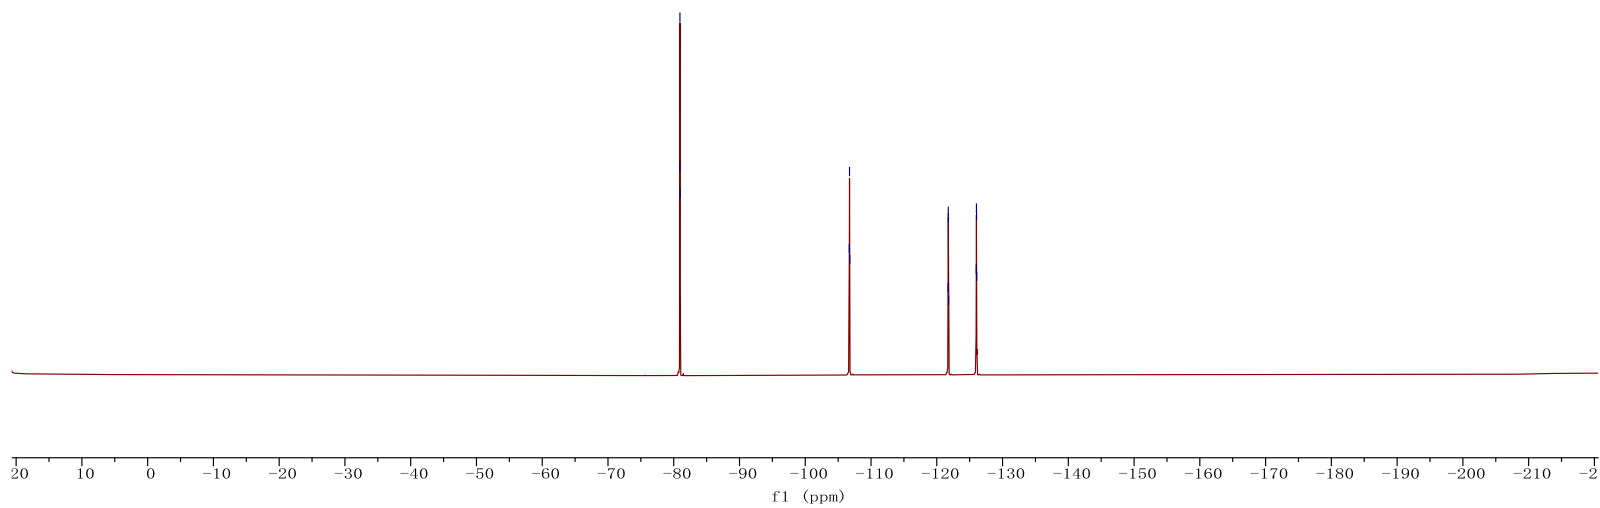

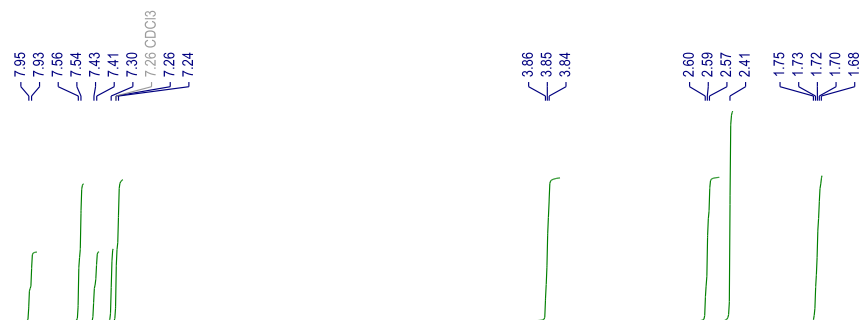

$^1\text{H}$  NMR of 34 (400 MHz,  $\text{CDCl}_3$ )

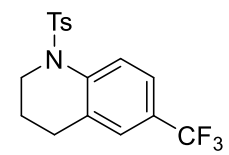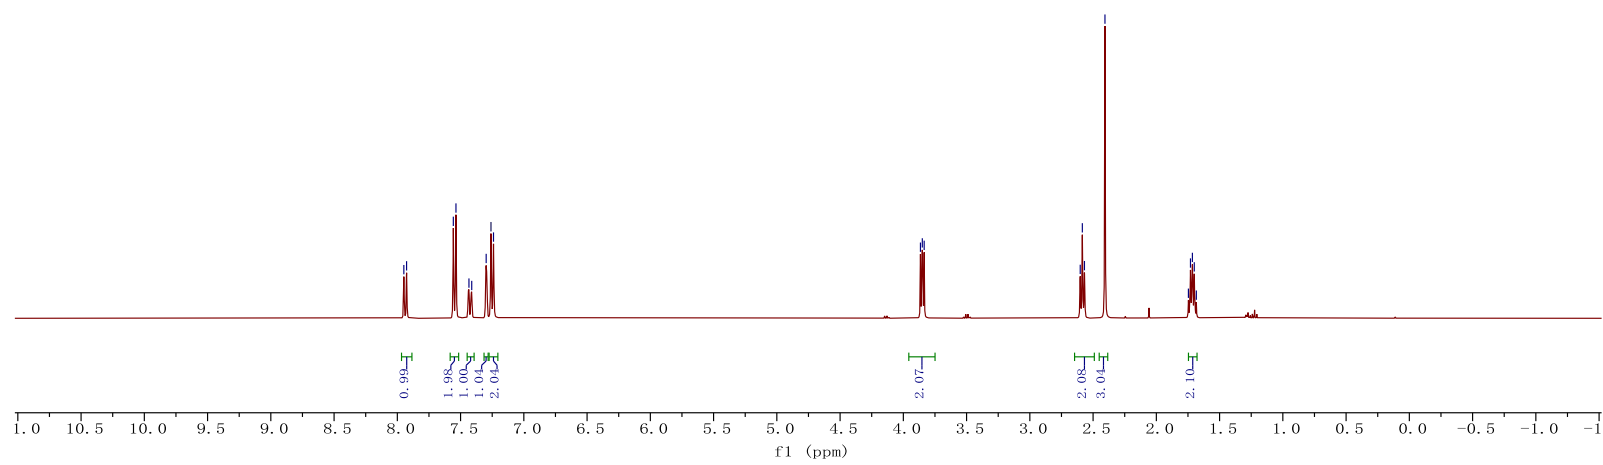

144.19  
140.10  
136.35  
130.36  
129.91  
127.07  
126.82  
126.50  
126.41  
126.37  
126.33  
126.29  
126.17  
125.85  
125.50  
124.21  
123.52  
123.48  
123.44  
123.41

— 77.16 CDCl<sub>3</sub>

— 46.62

— 26.96

21.60  
21.27

<sup>13</sup>C NMR of 34 (101 MHz, CDCl<sub>3</sub>)

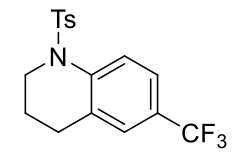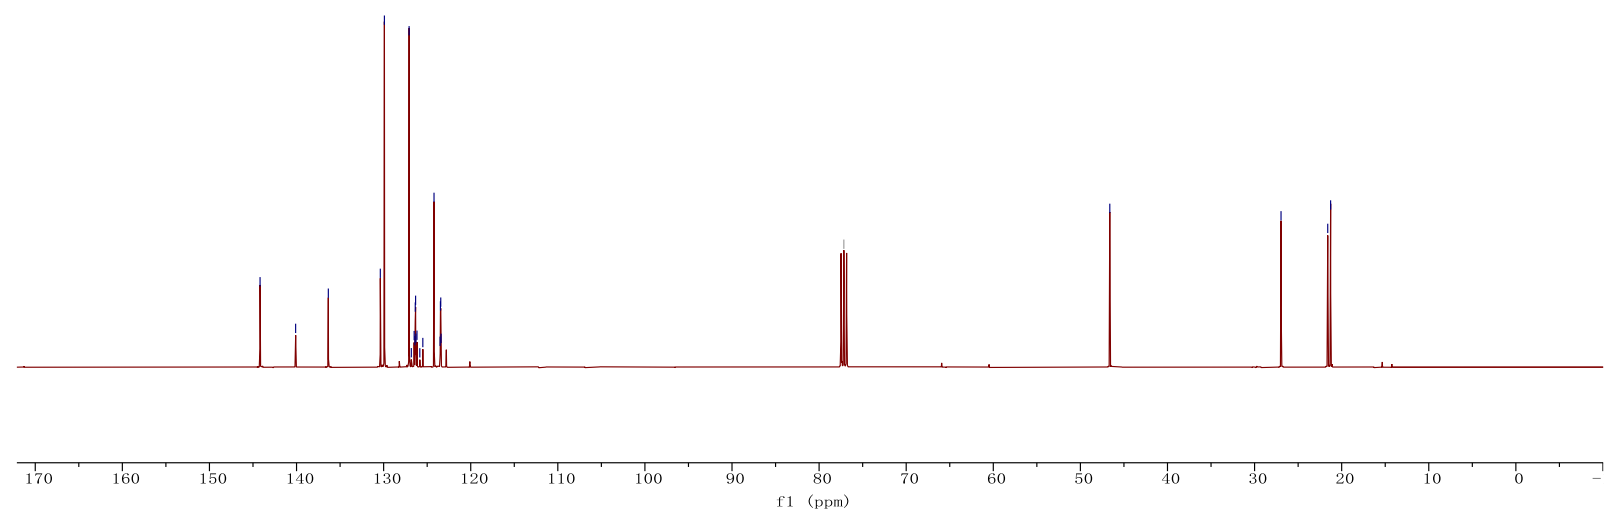

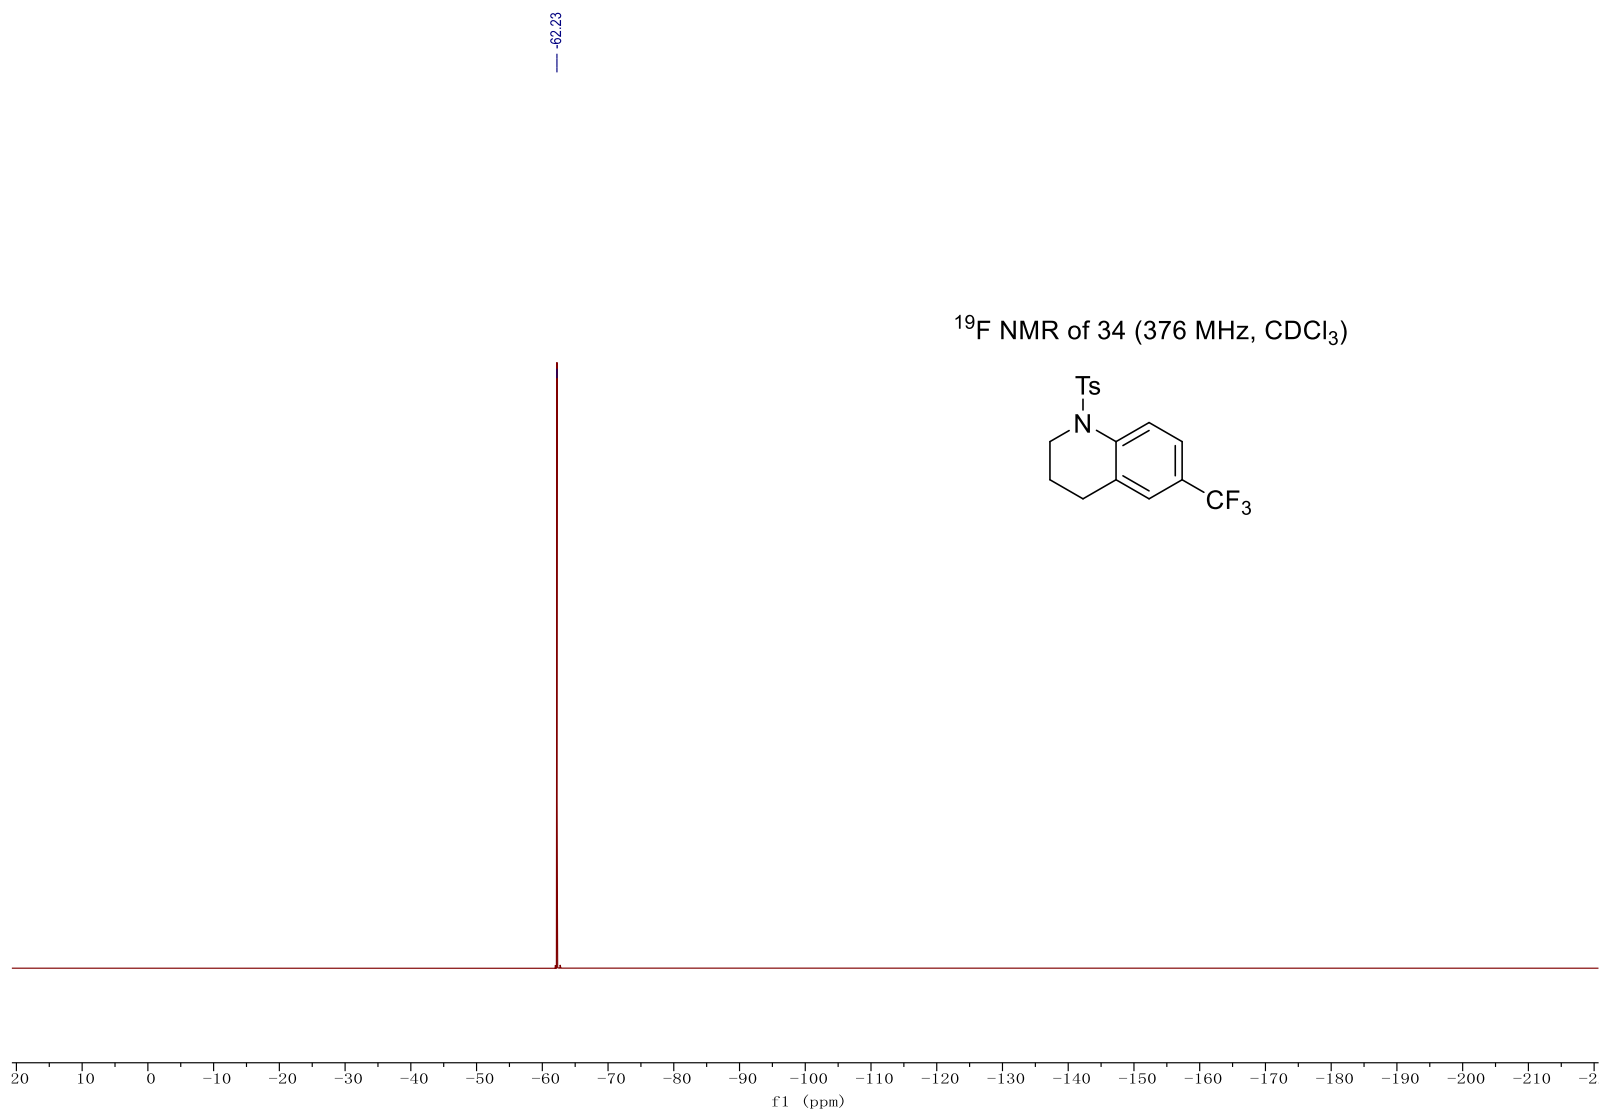

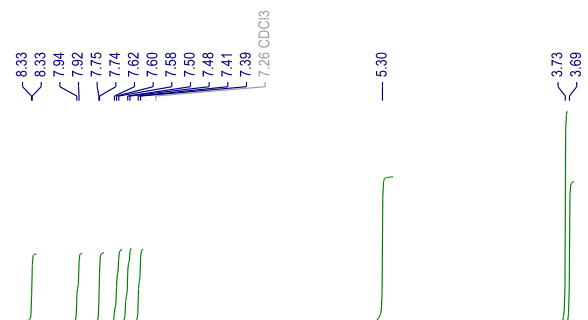

$^1\text{H}$  NMR of 35 (400 MHz,  $\text{CDCl}_3$ )

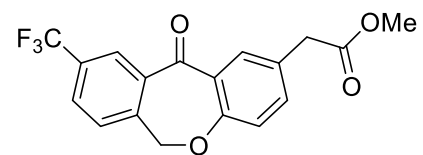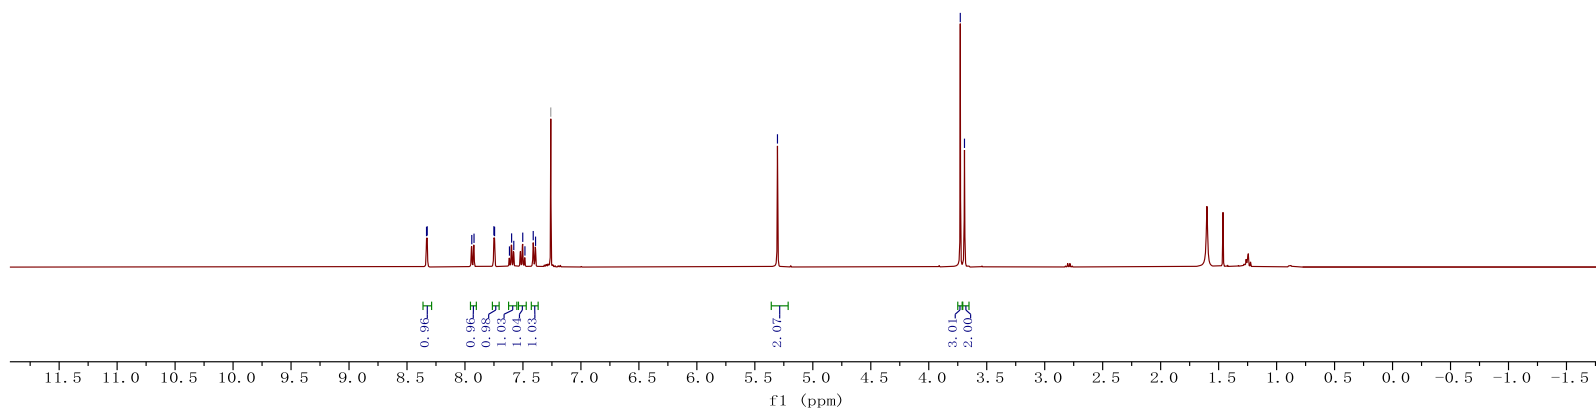

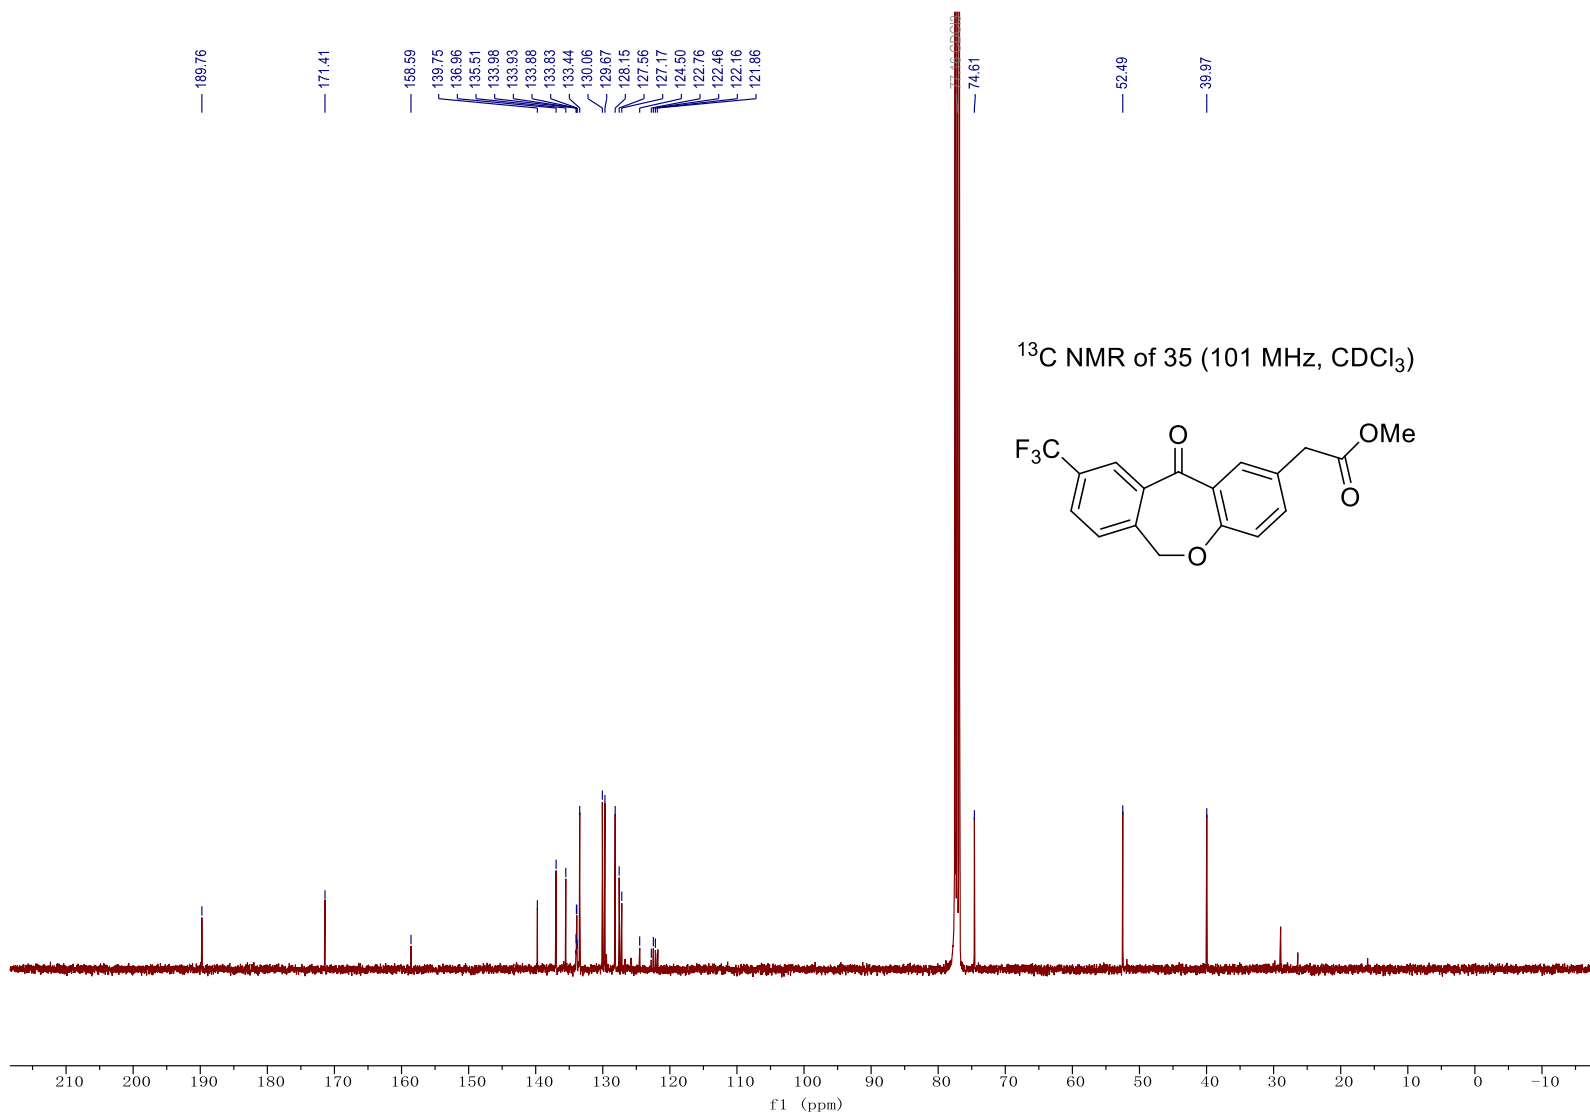

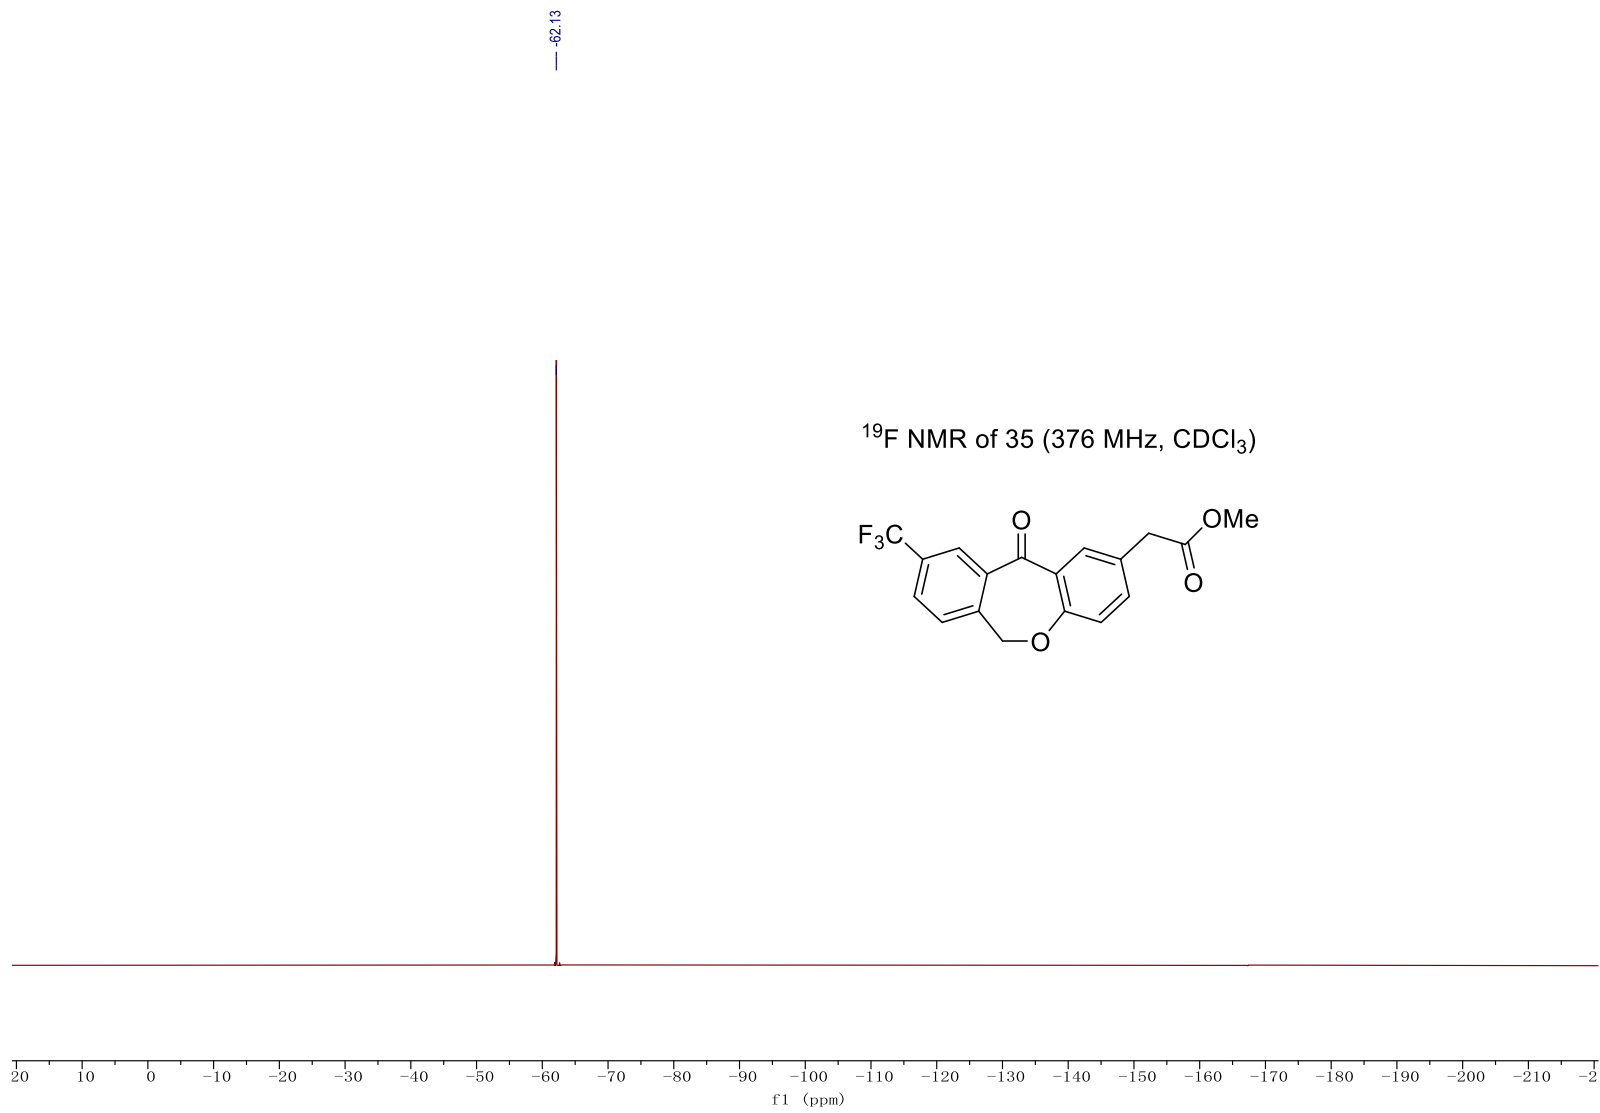

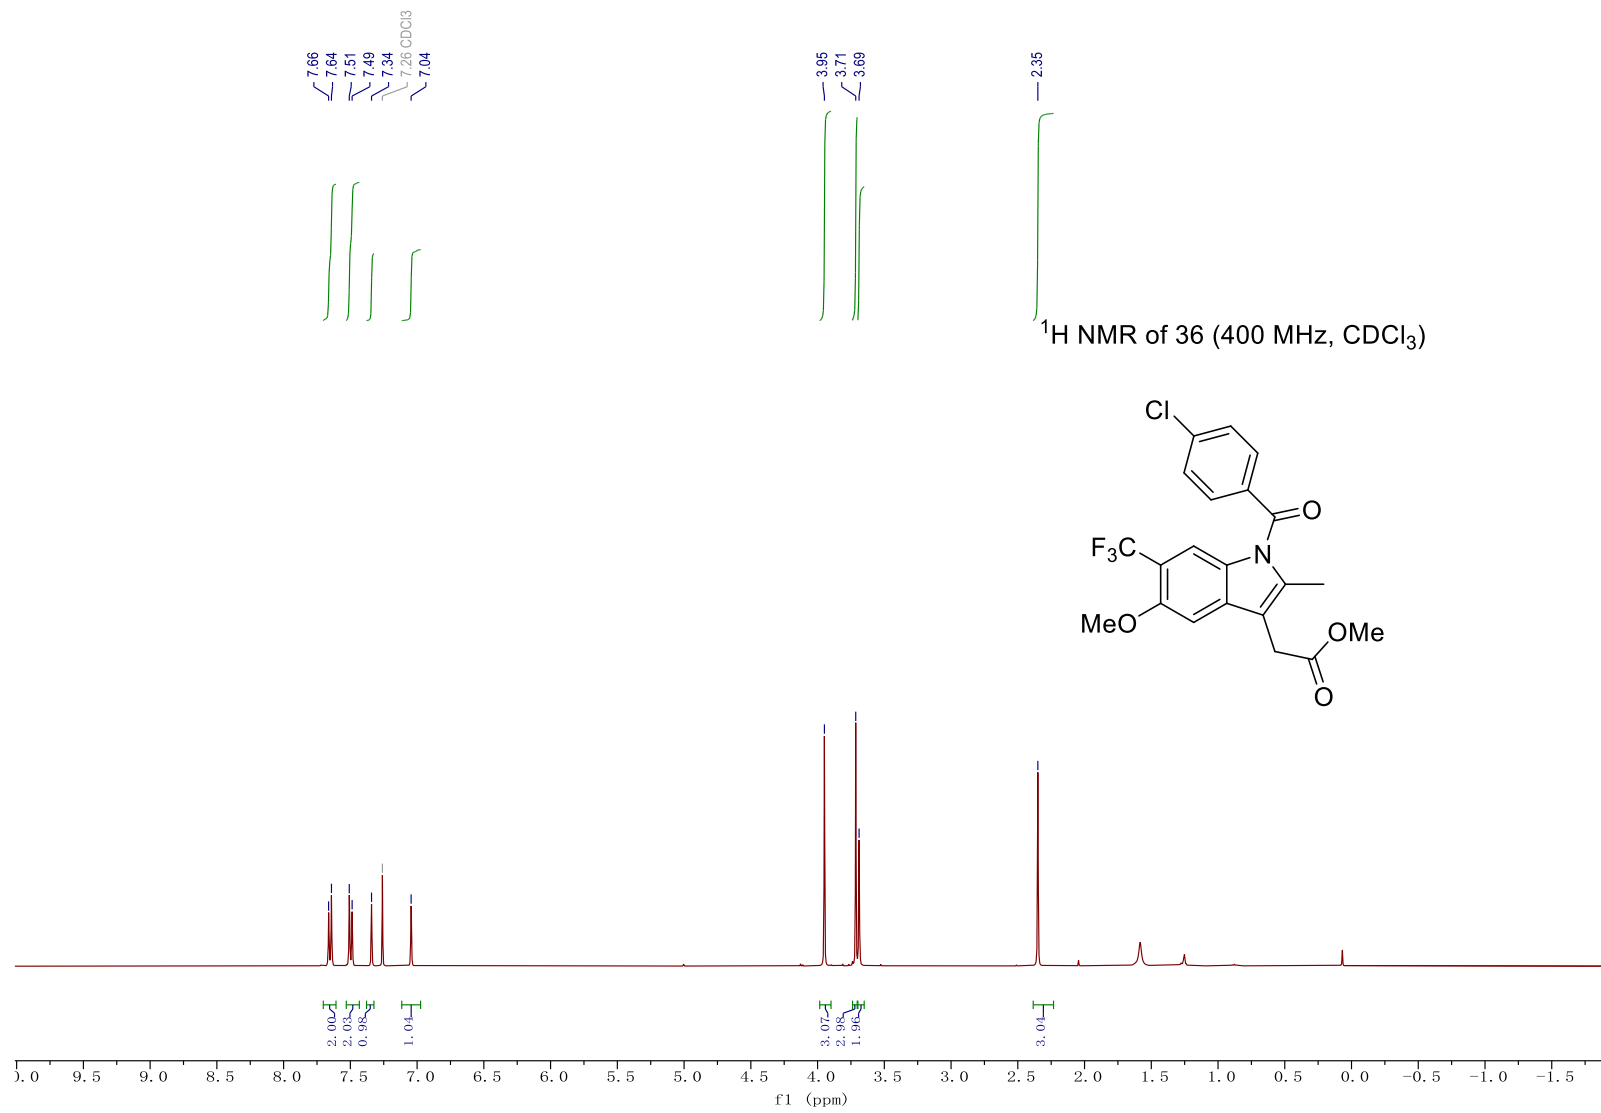

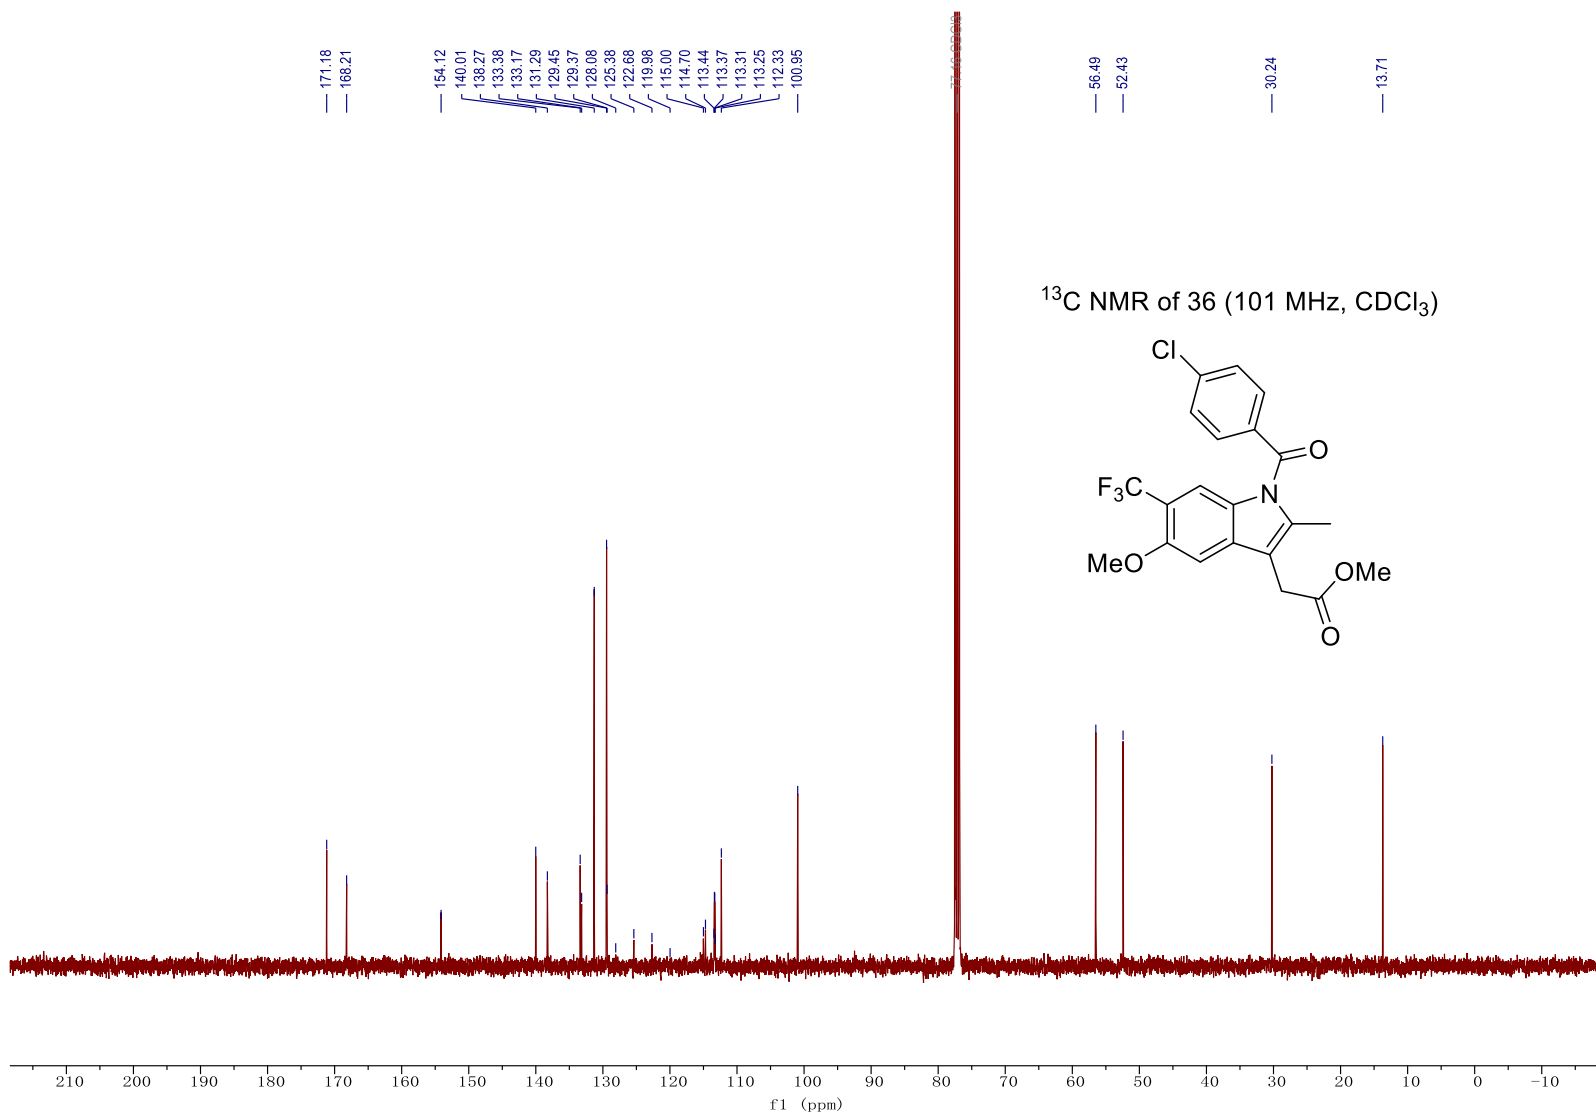

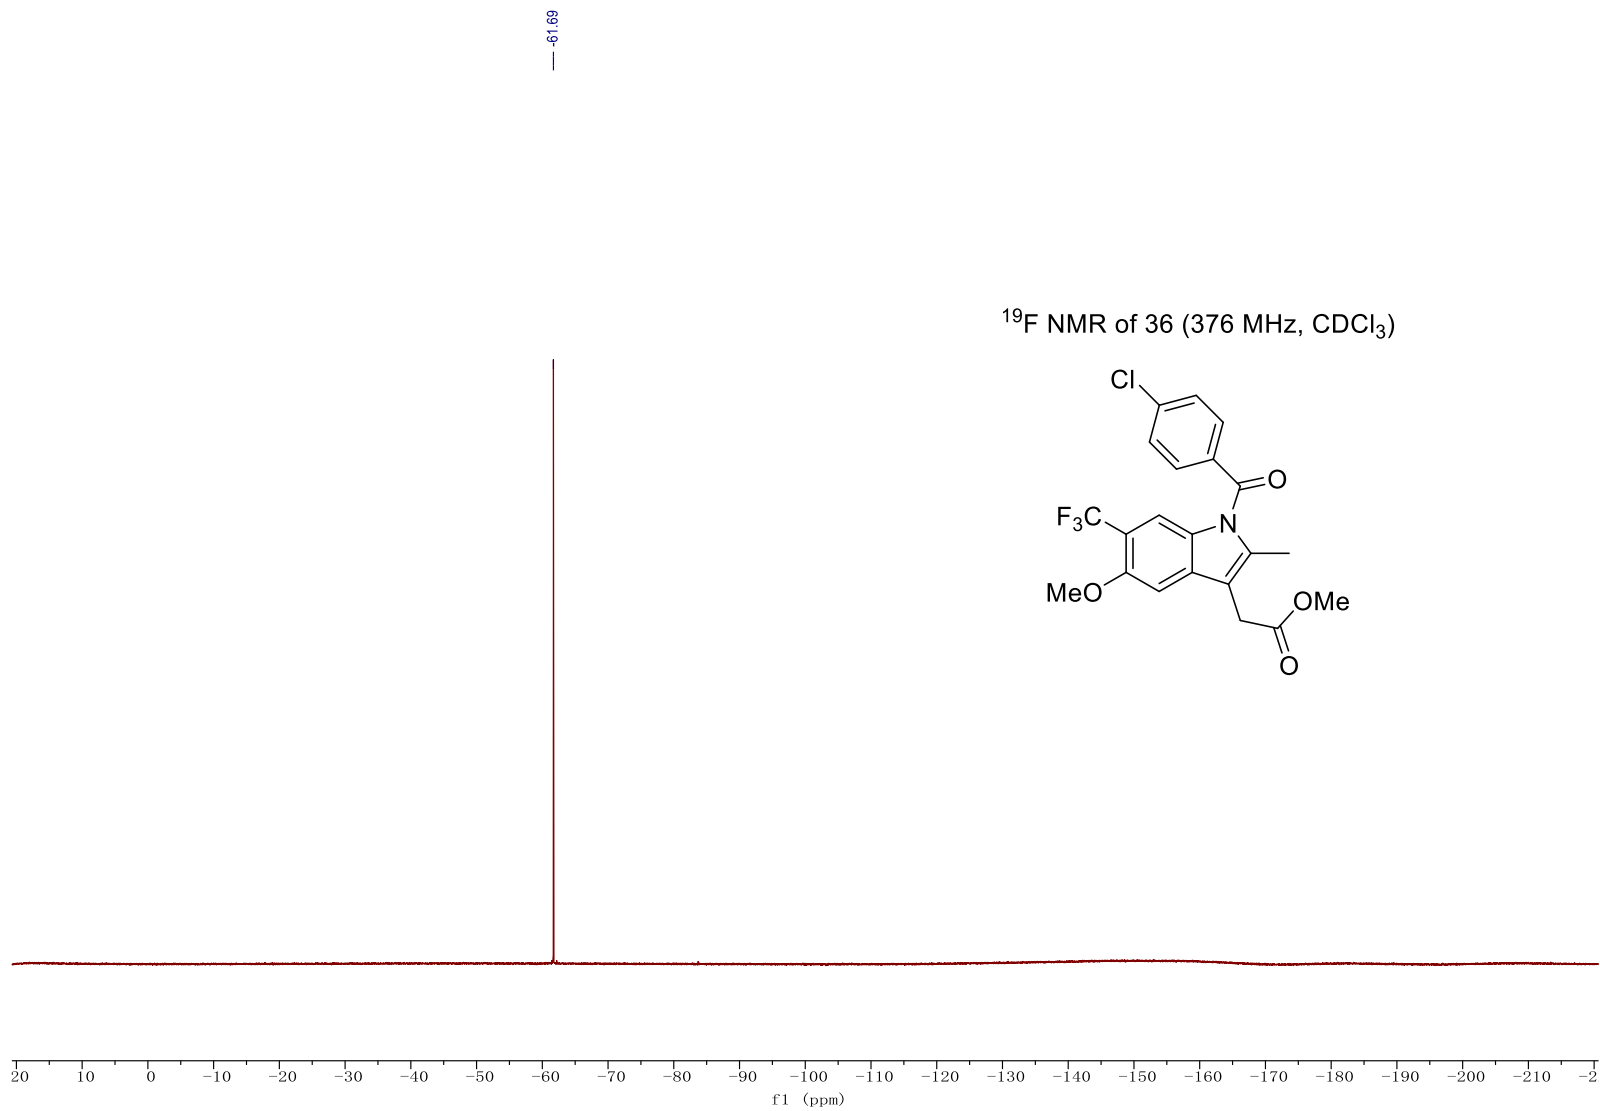

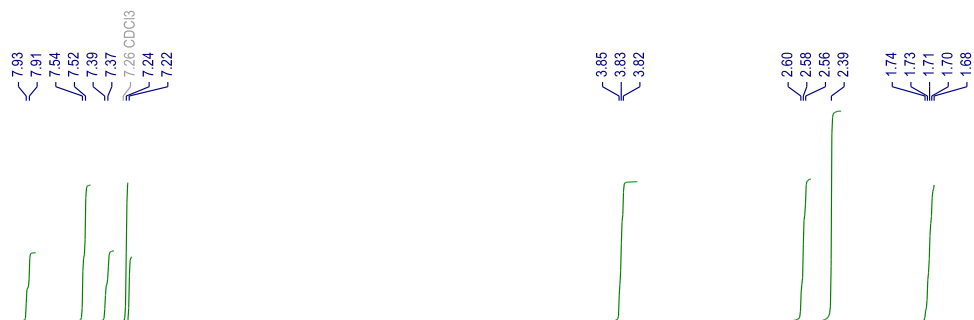

<sup>1</sup>H NMR of 37 (400 MHz, CDCl<sub>3</sub>)

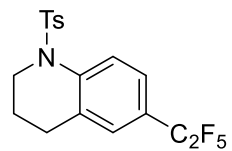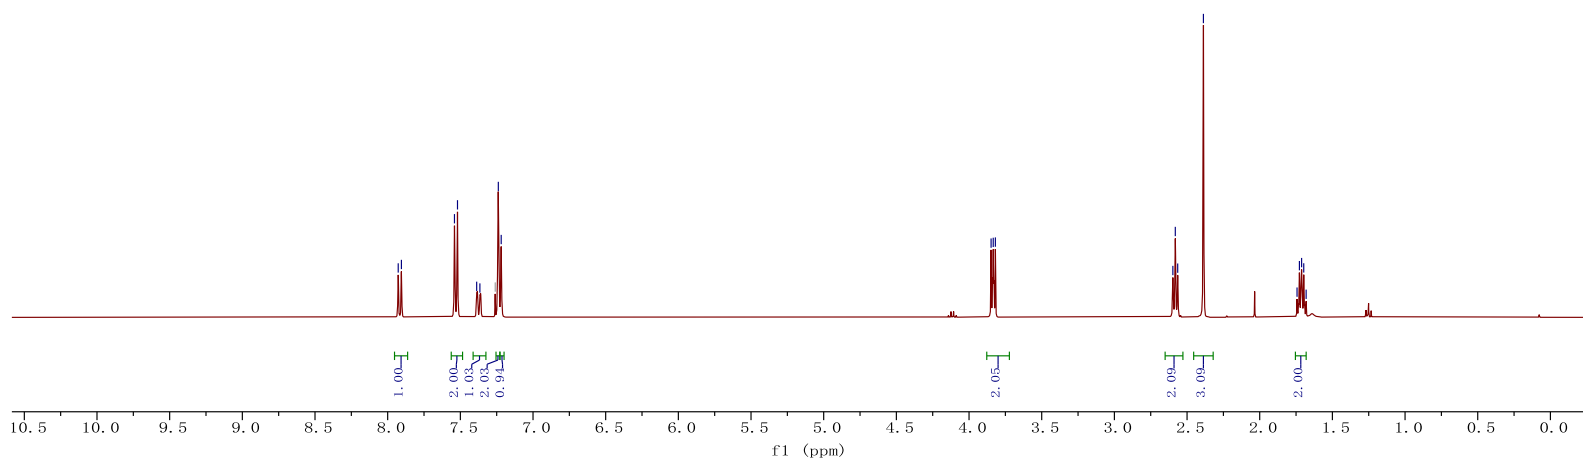

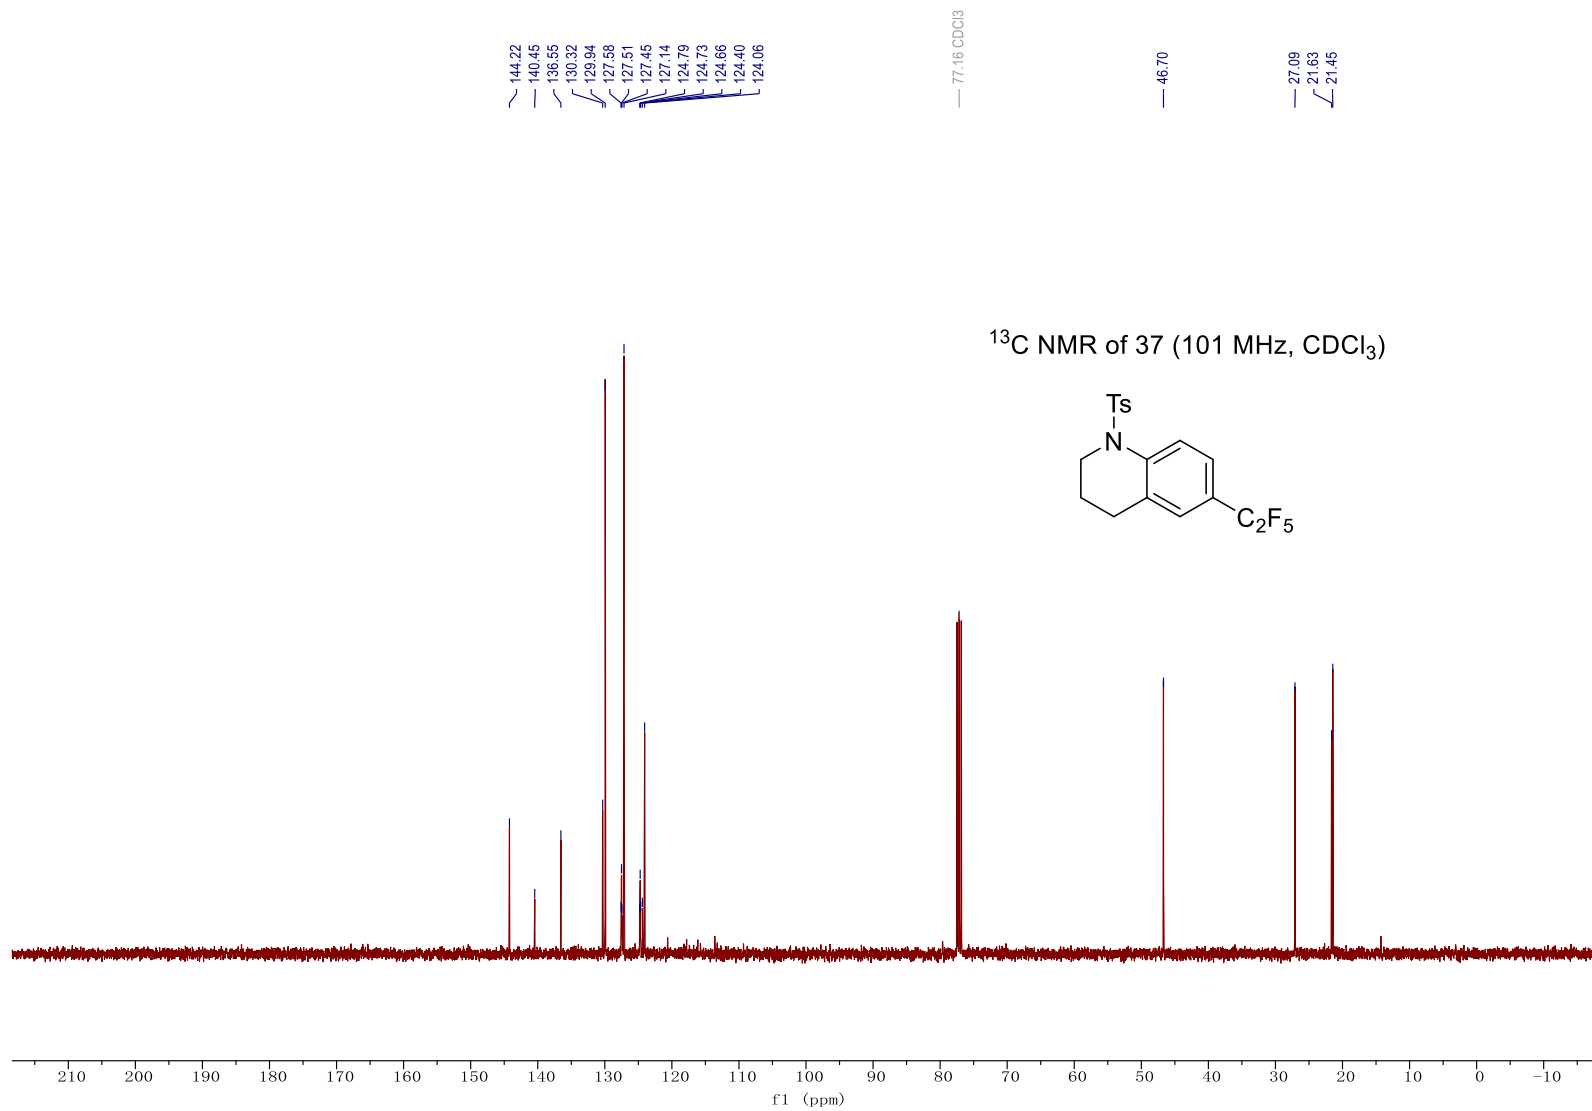

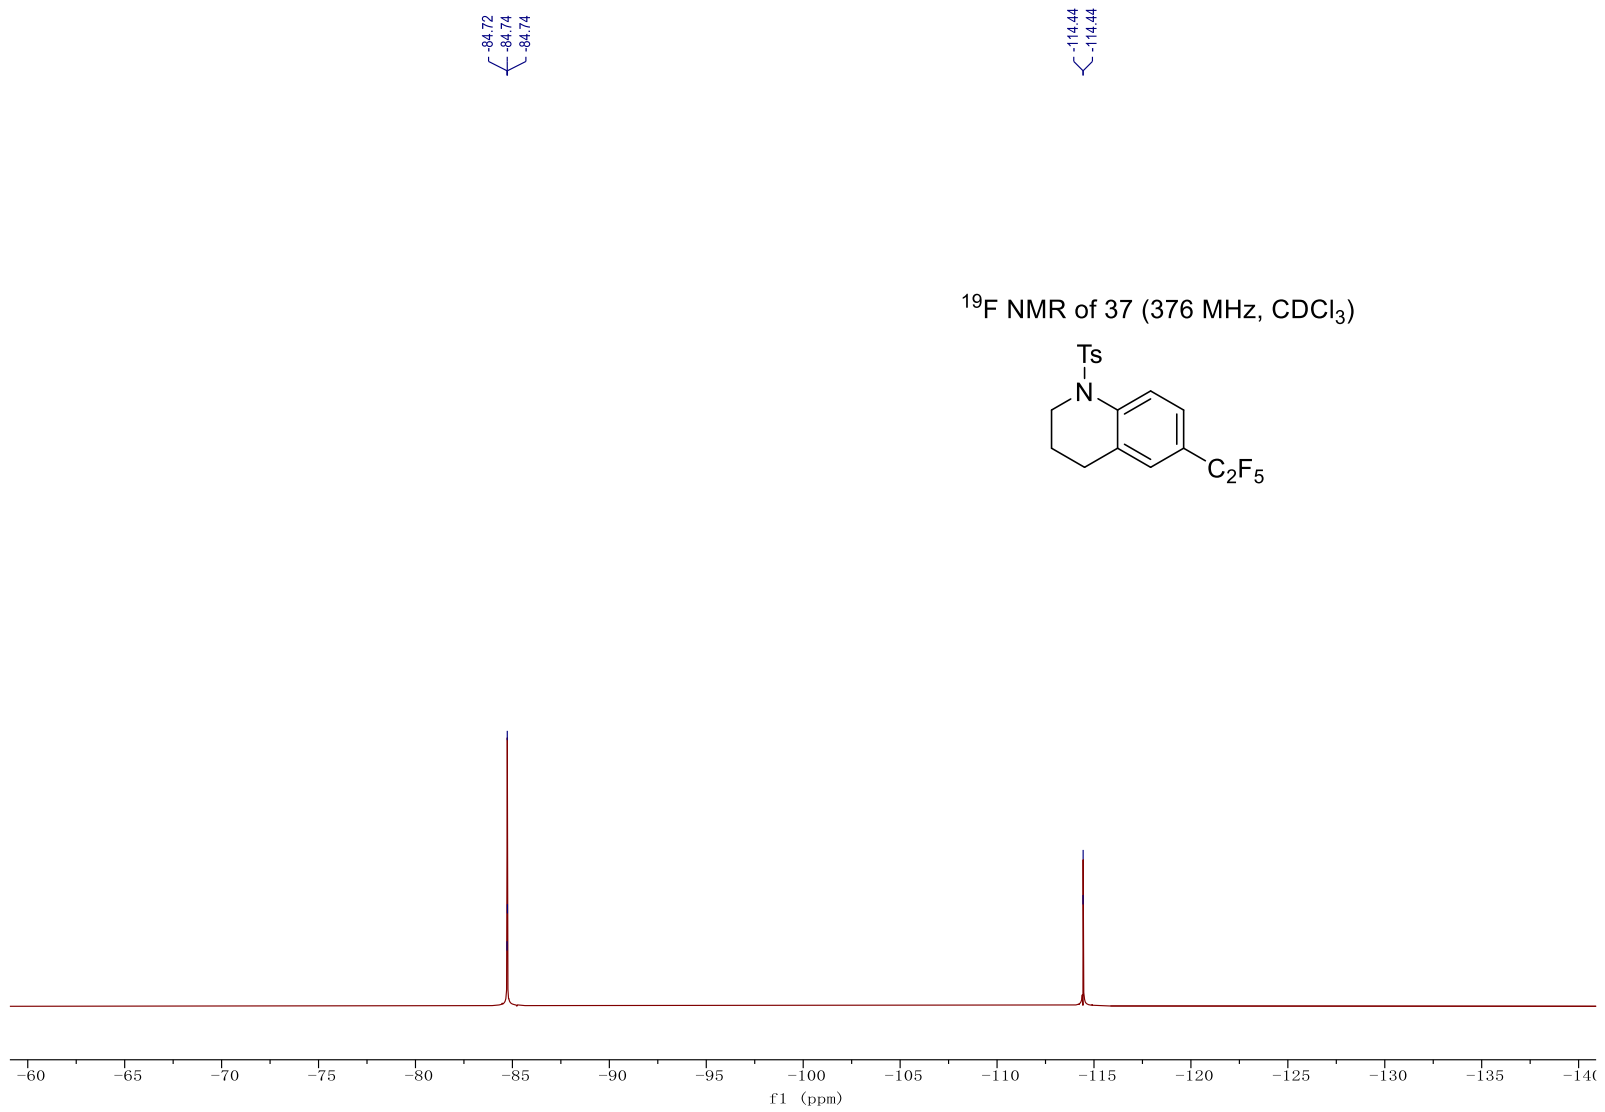

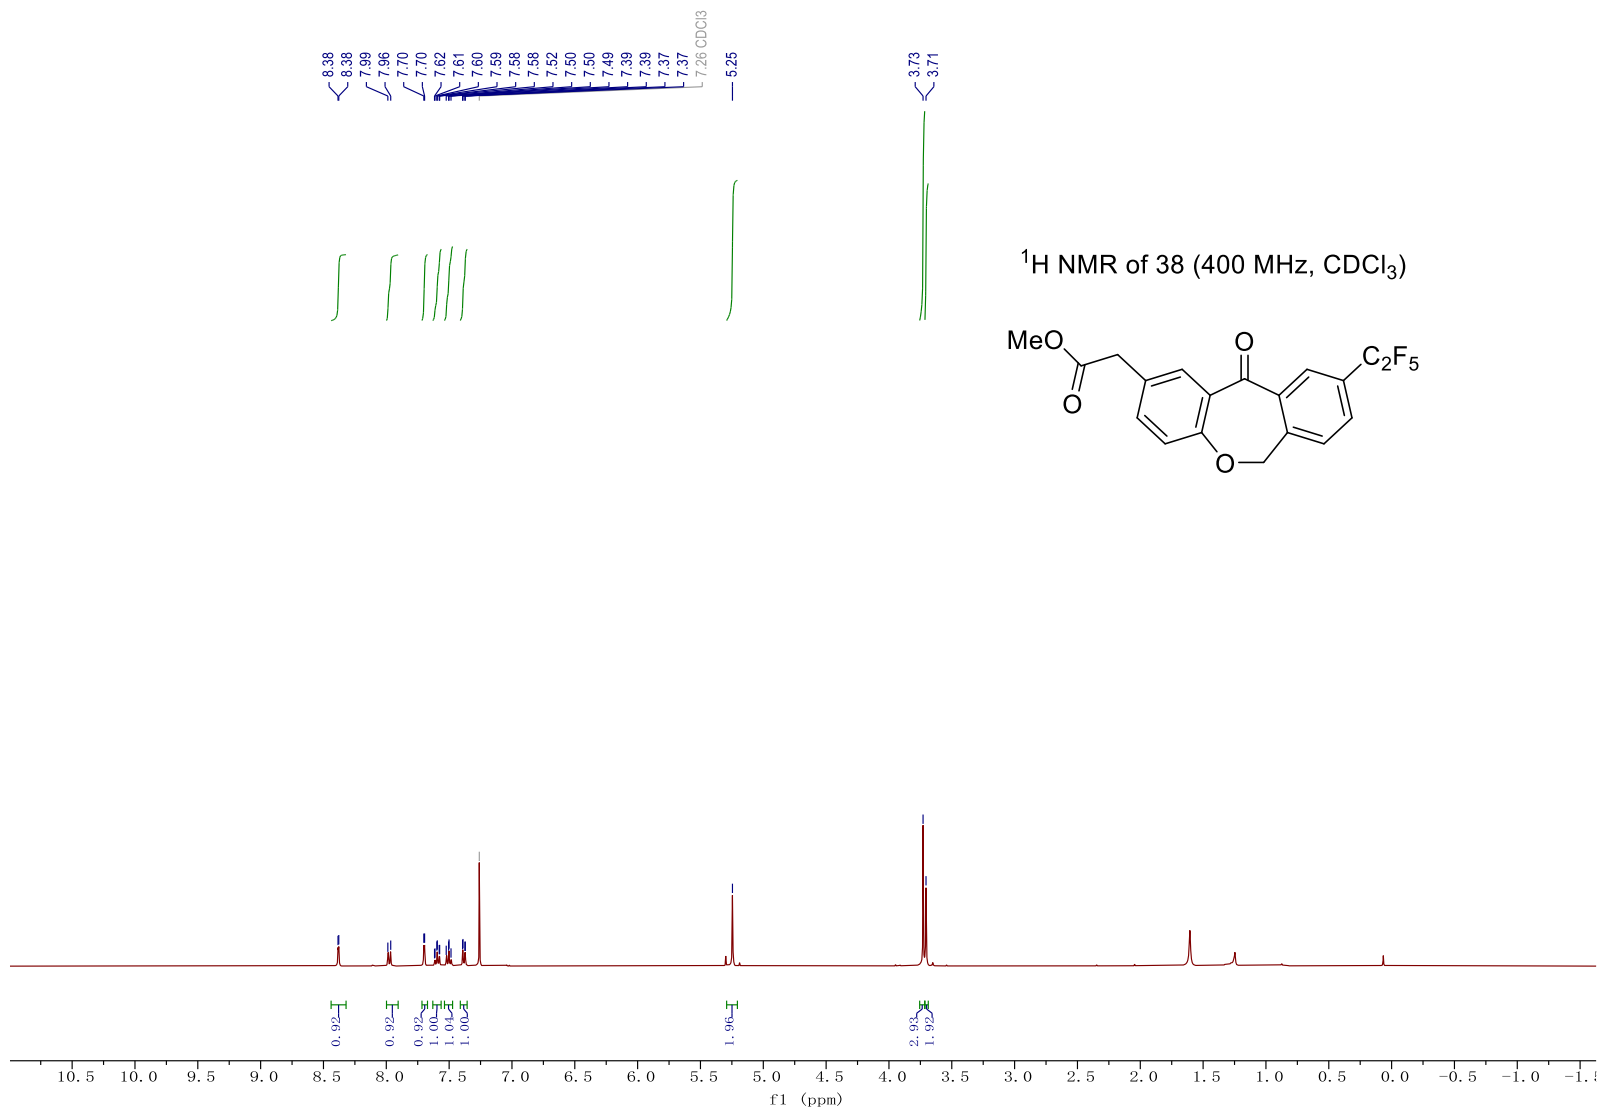

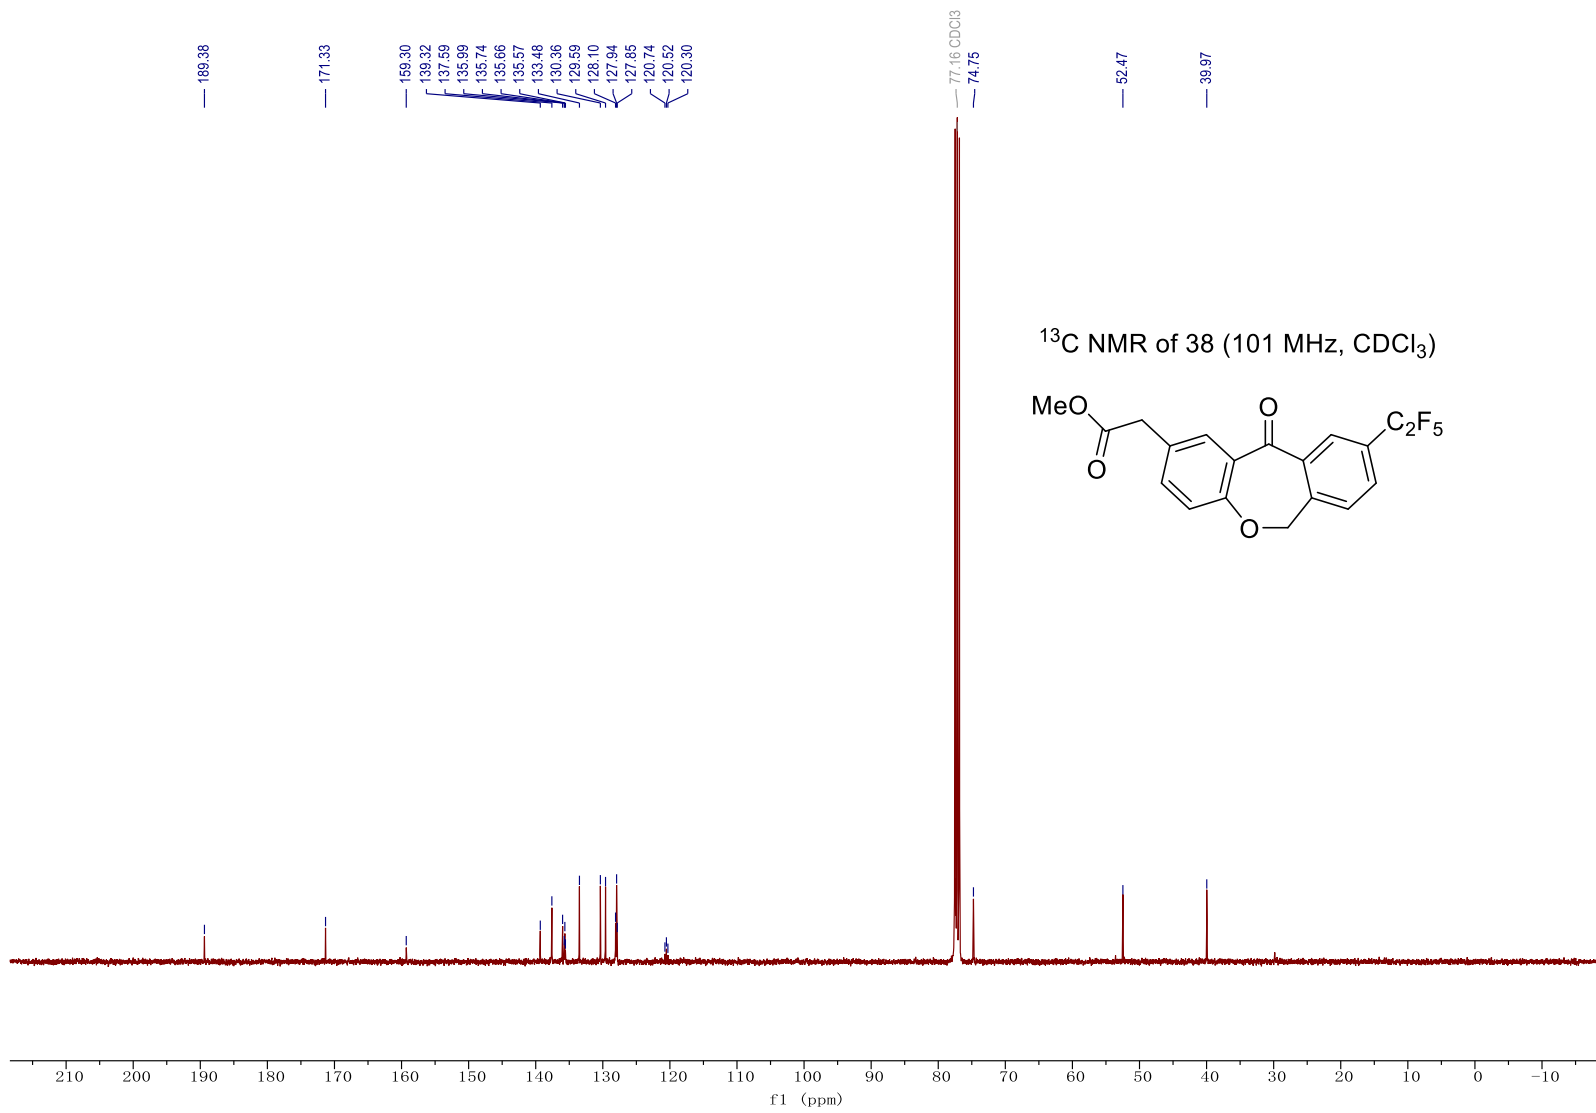

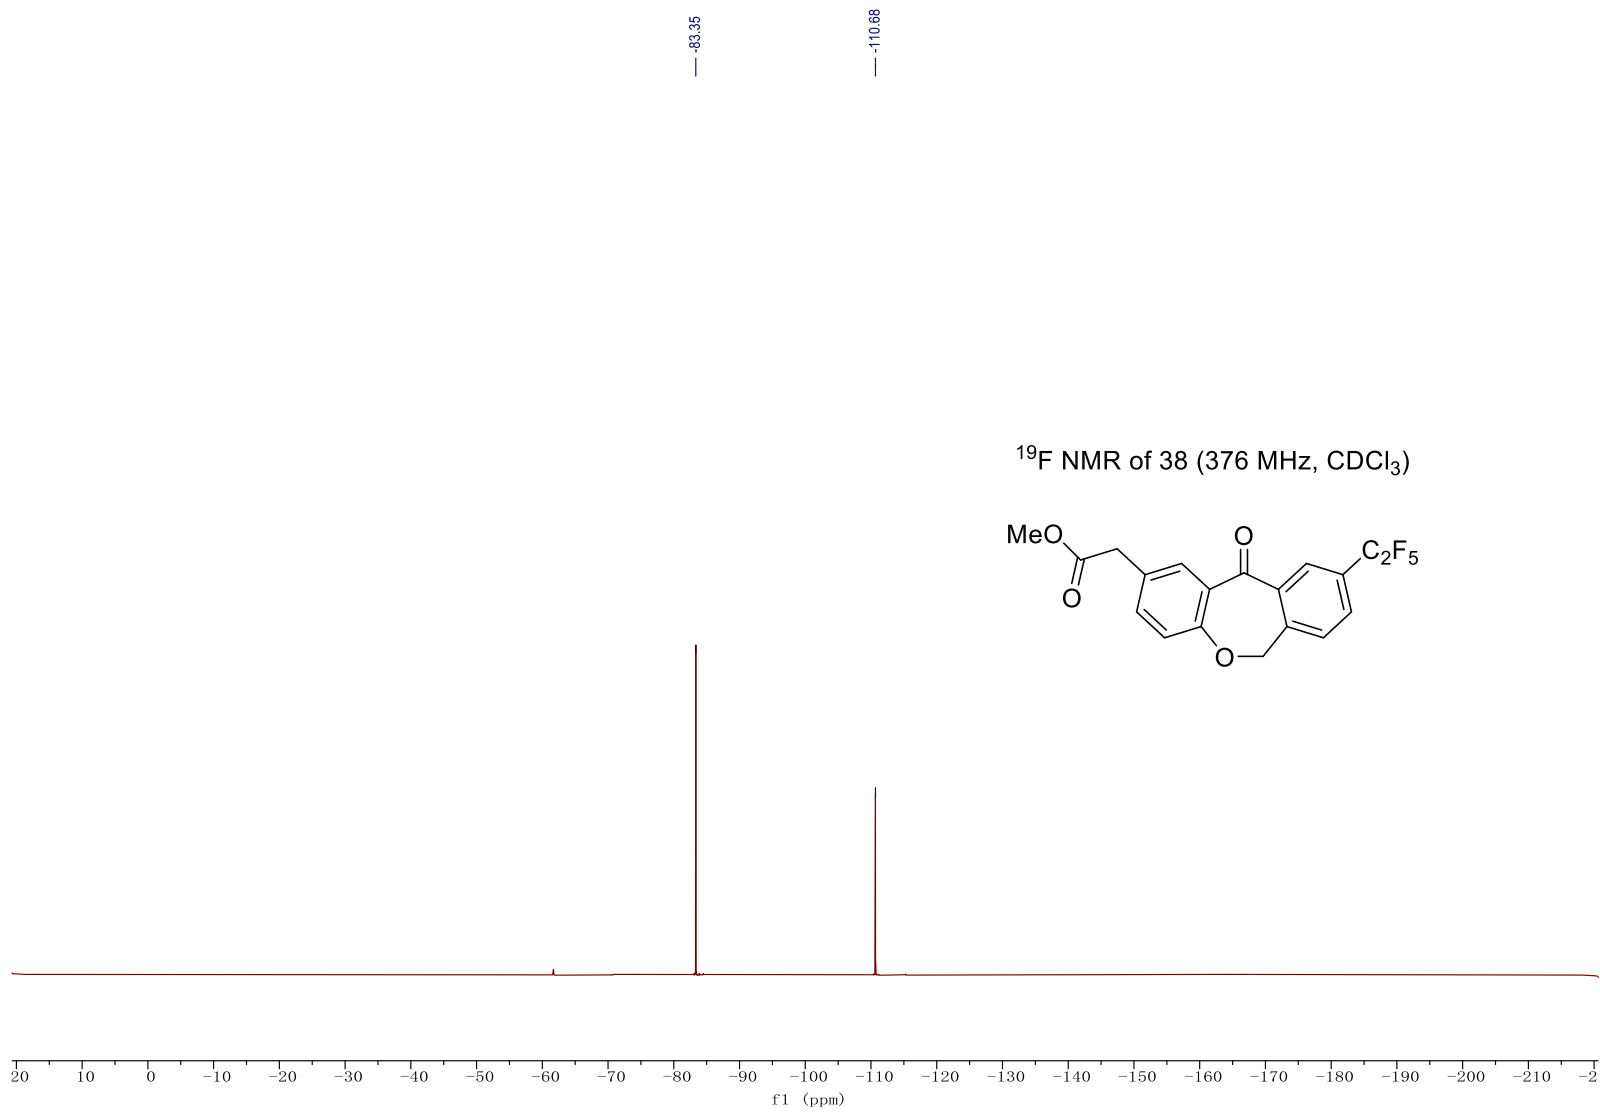

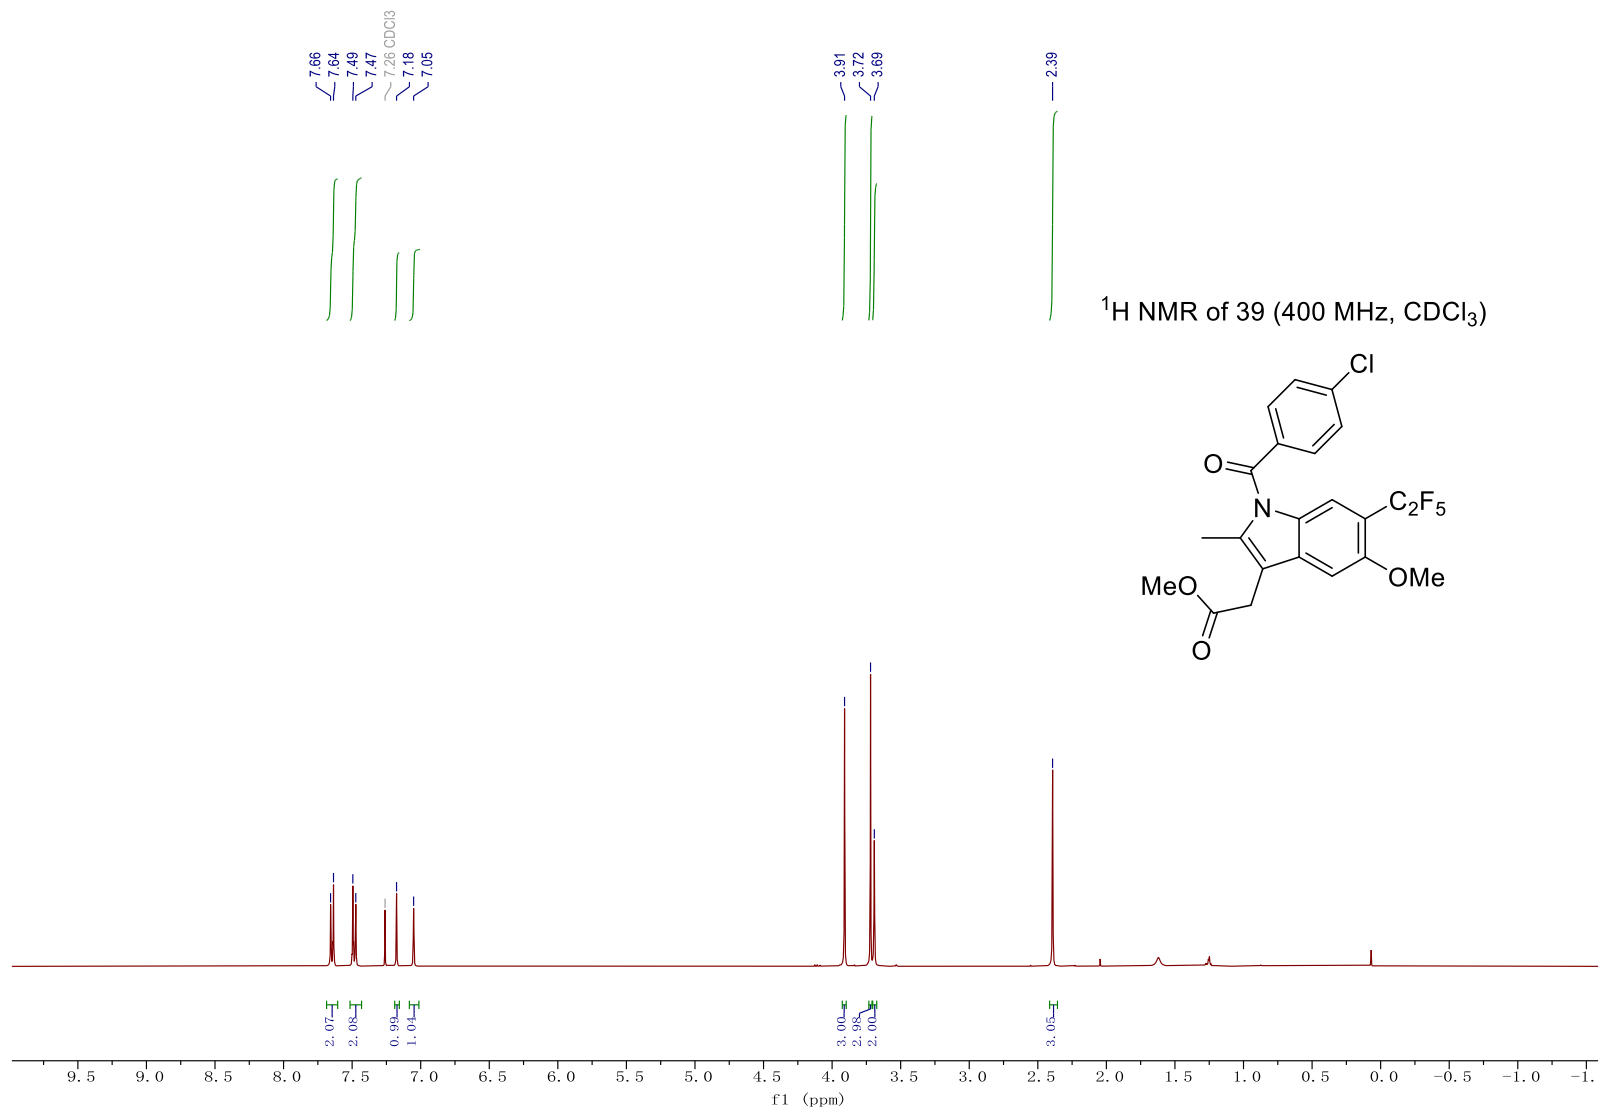

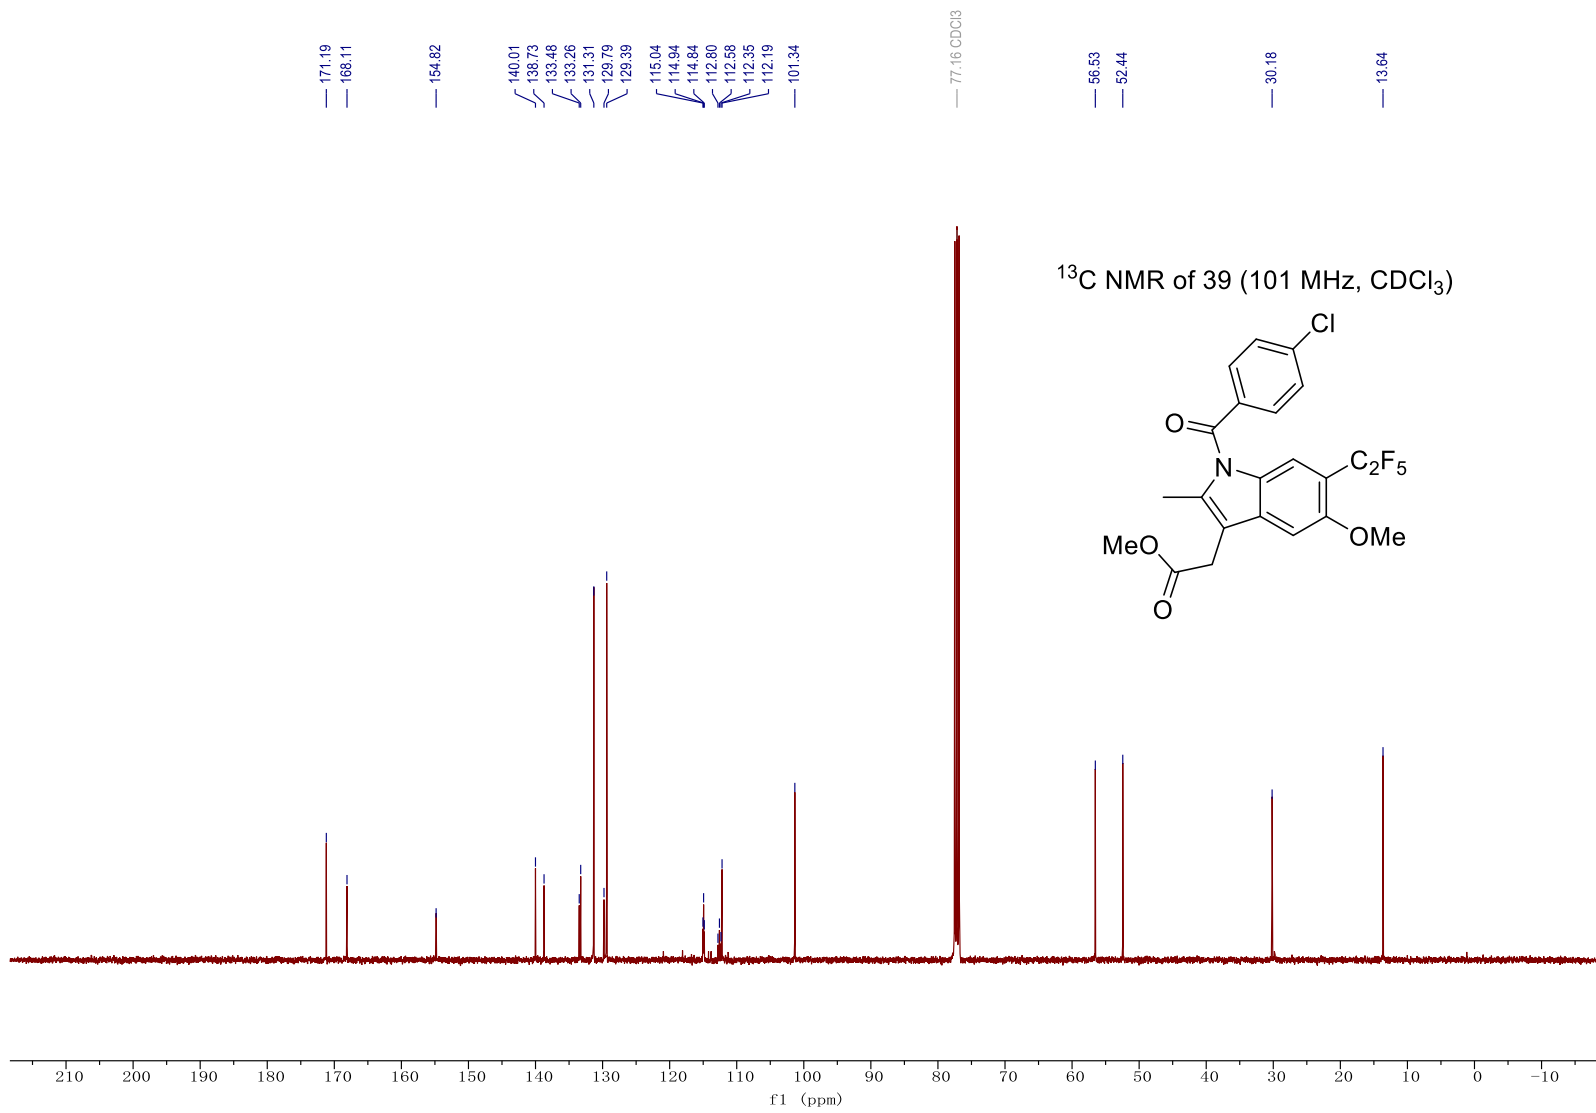

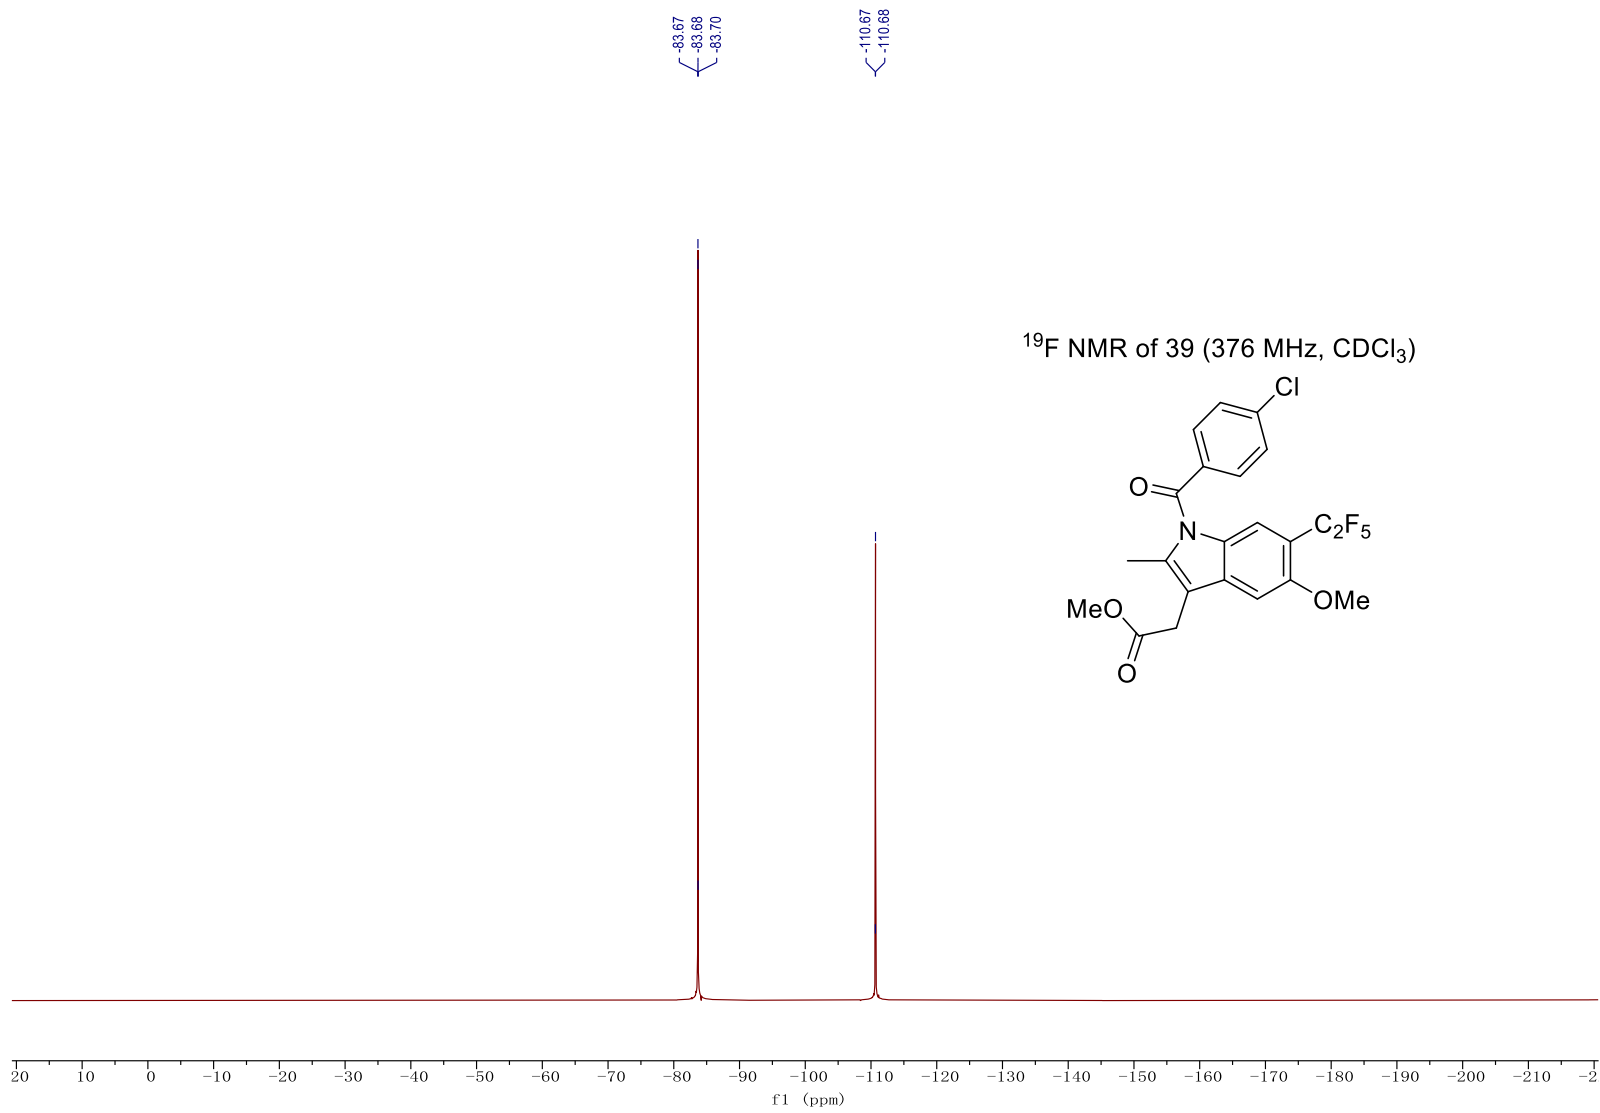

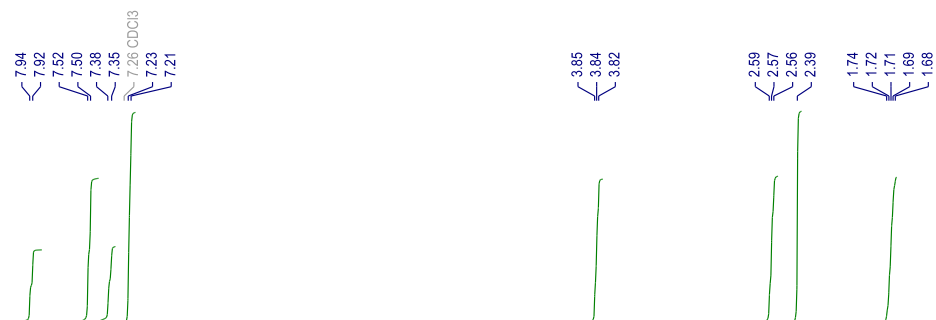

<sup>1</sup>H NMR of 40 (400 MHz, CDCl<sub>3</sub>)

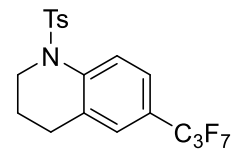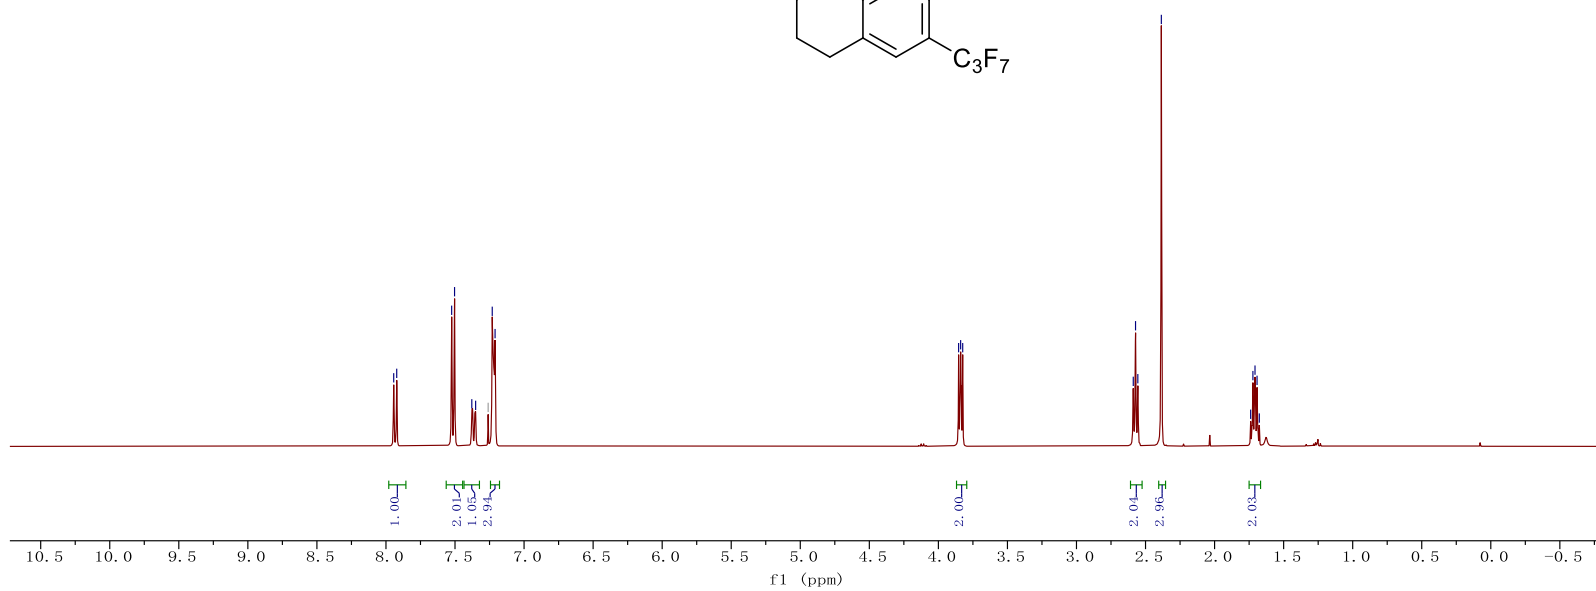

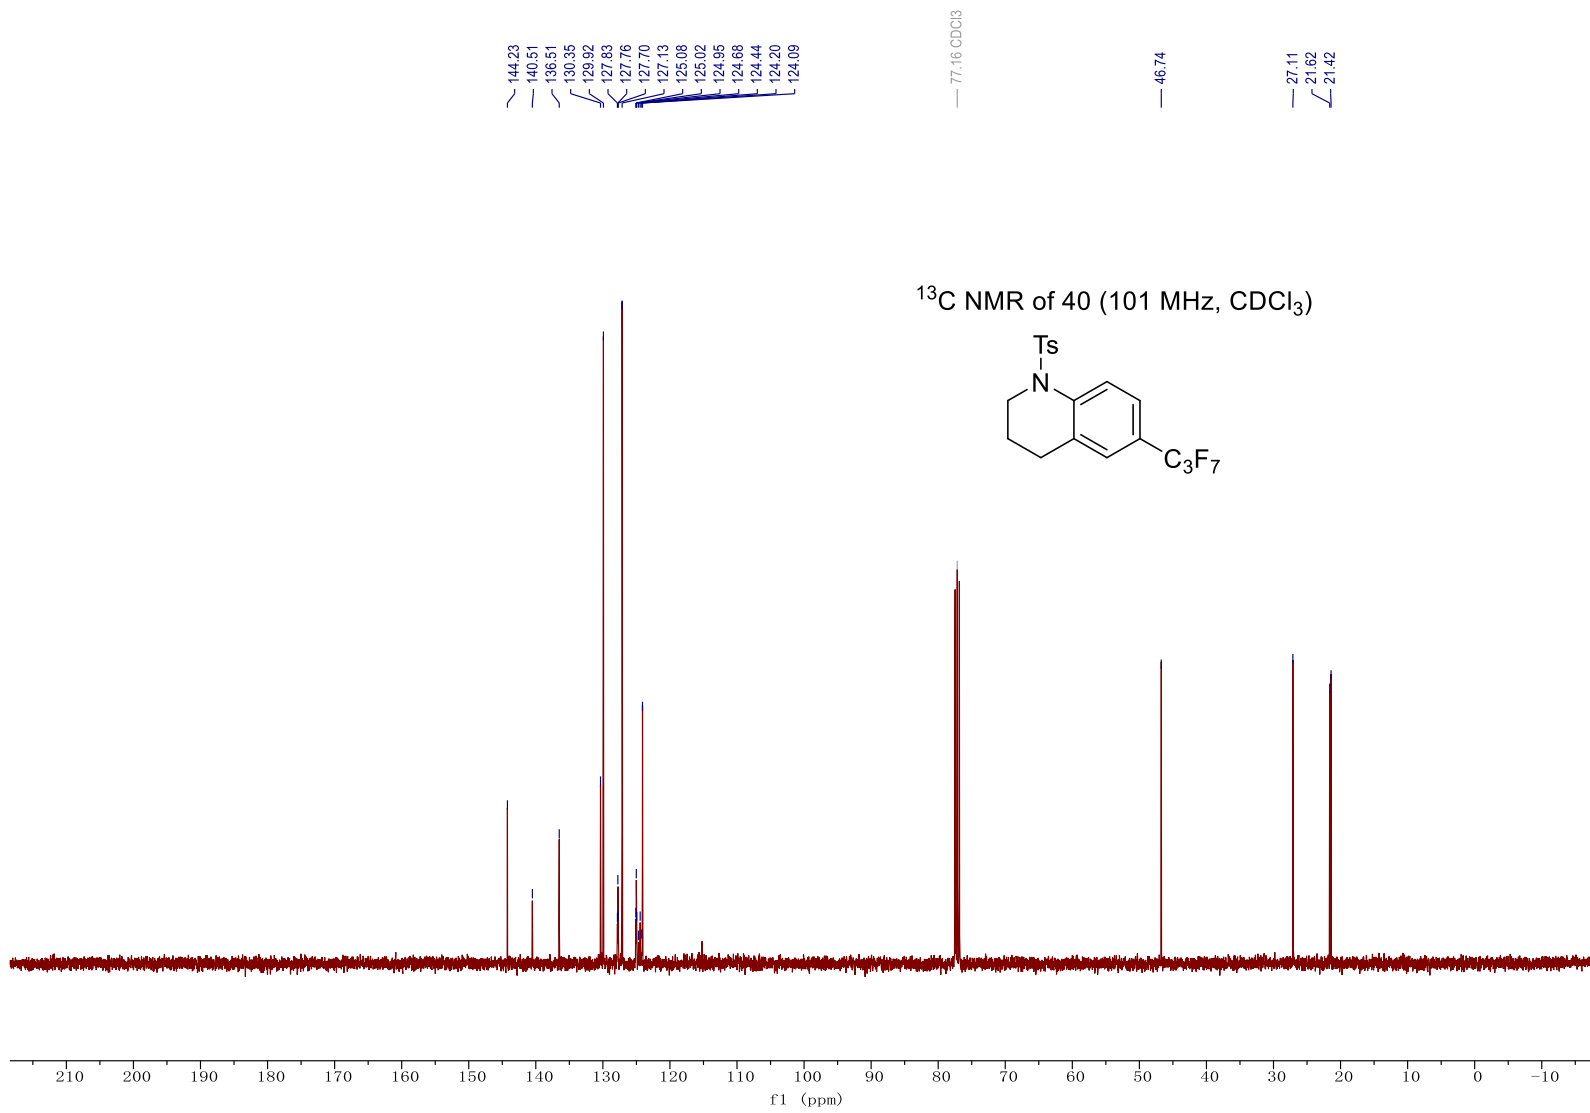

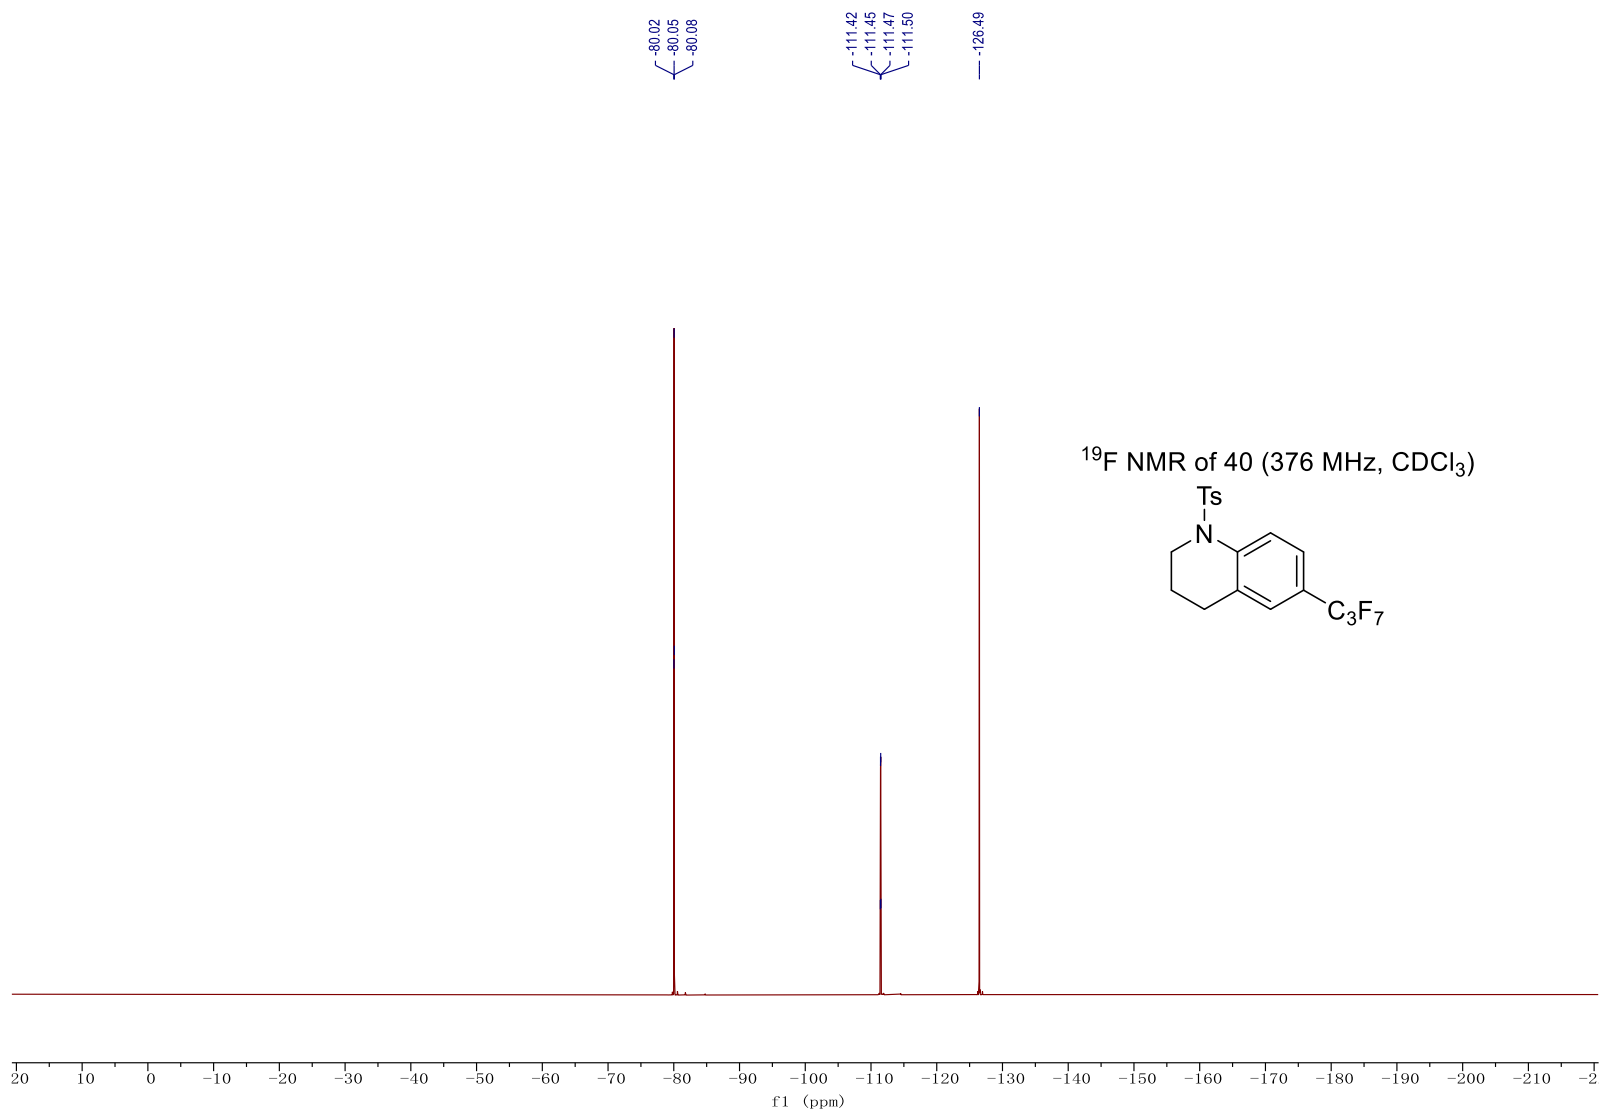

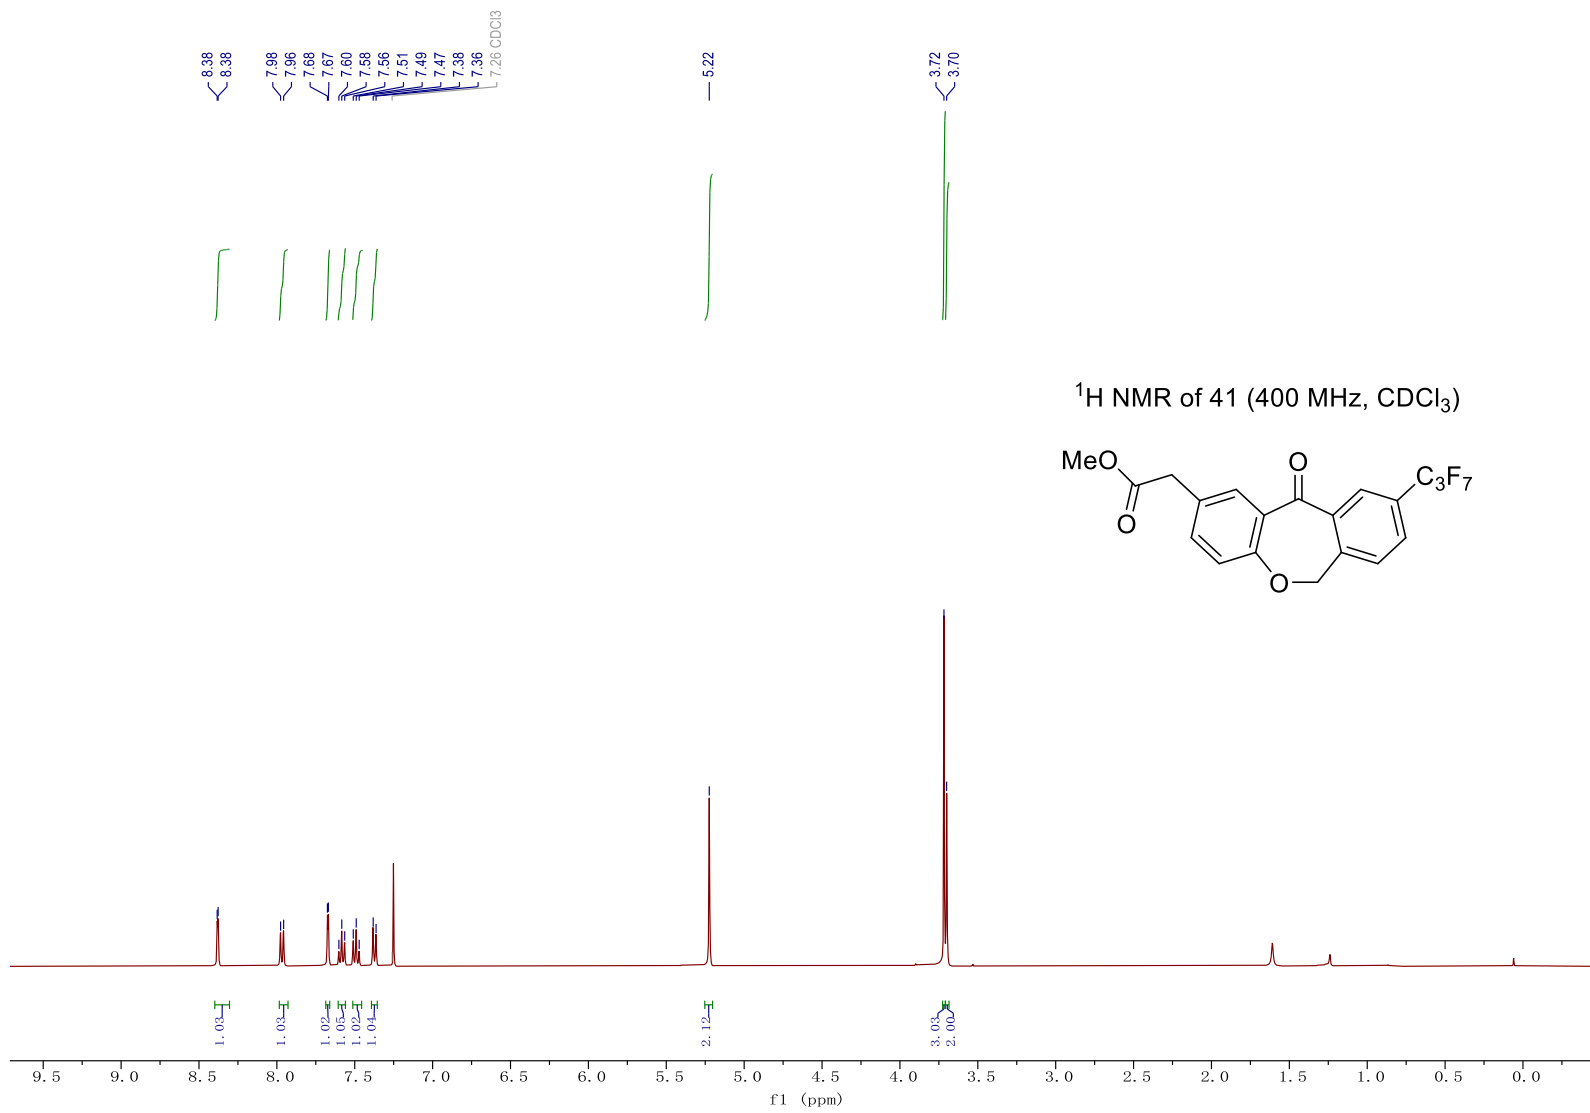

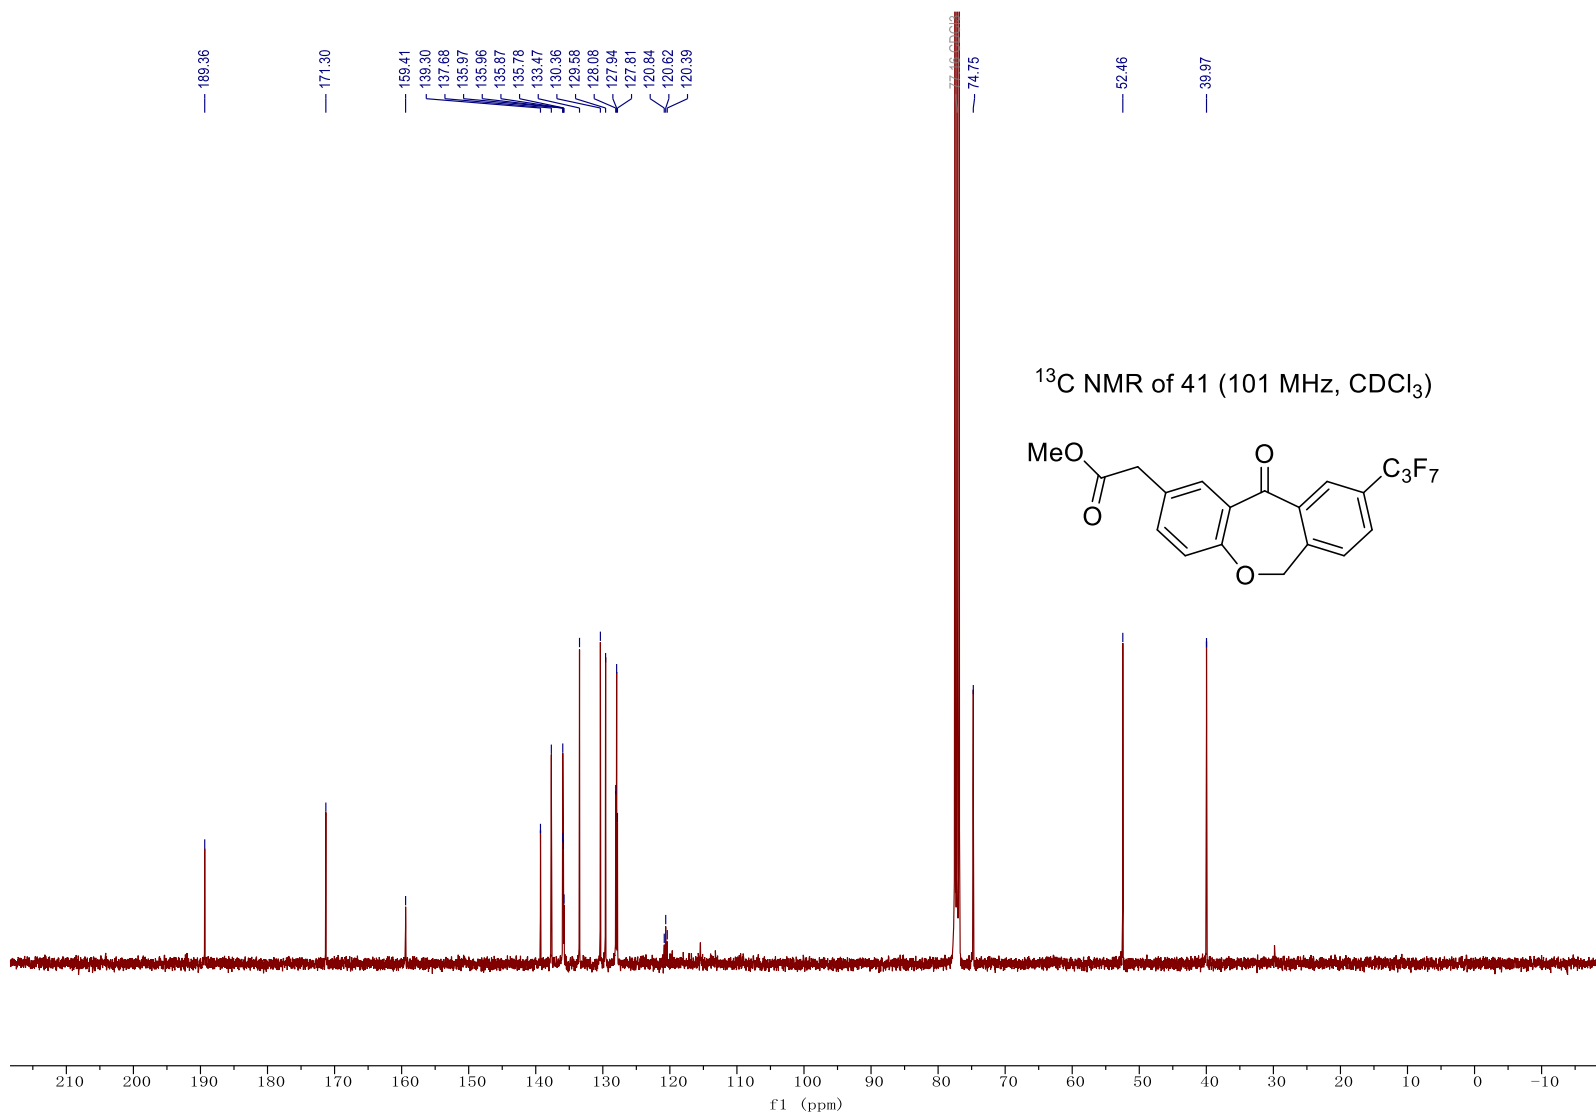

-80.29  
-80.31  
-80.34

-107.40  
-107.43  
-107.46  
-107.48

-125.17  
-125.18

<sup>19</sup>F NMR of 41 (376 MHz, CDCl<sub>3</sub>)

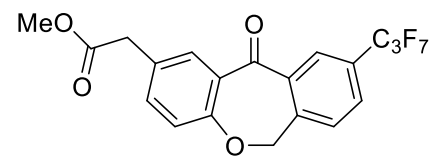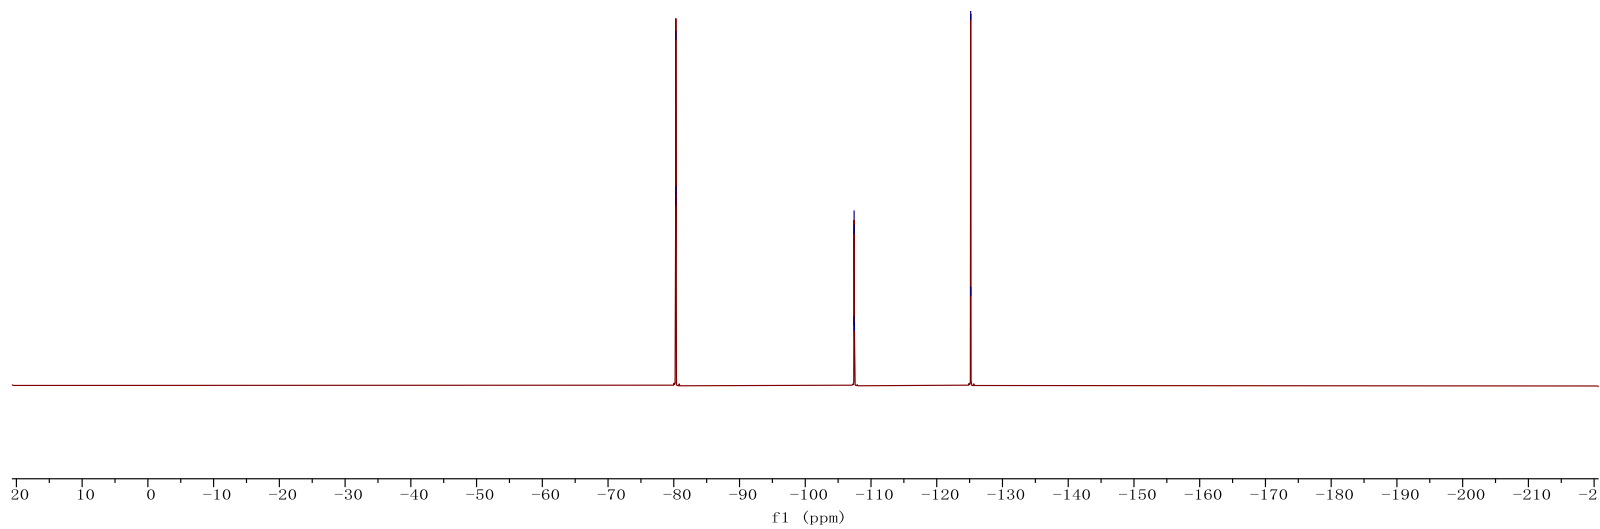

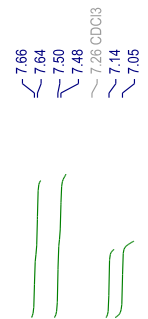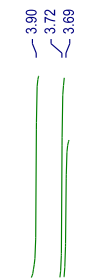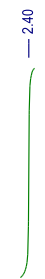

<sup>1</sup>H NMR of 42 (400 MHz, CDCl<sub>3</sub>)

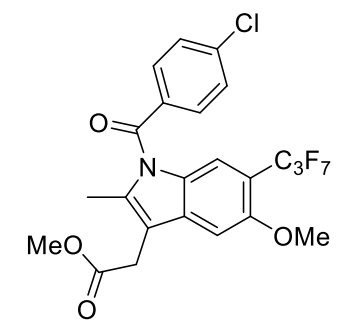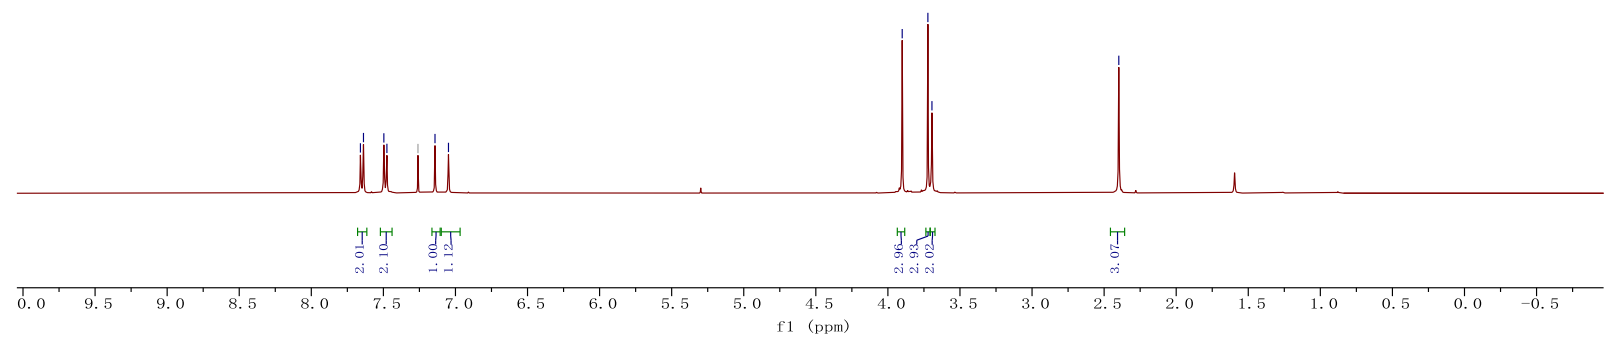

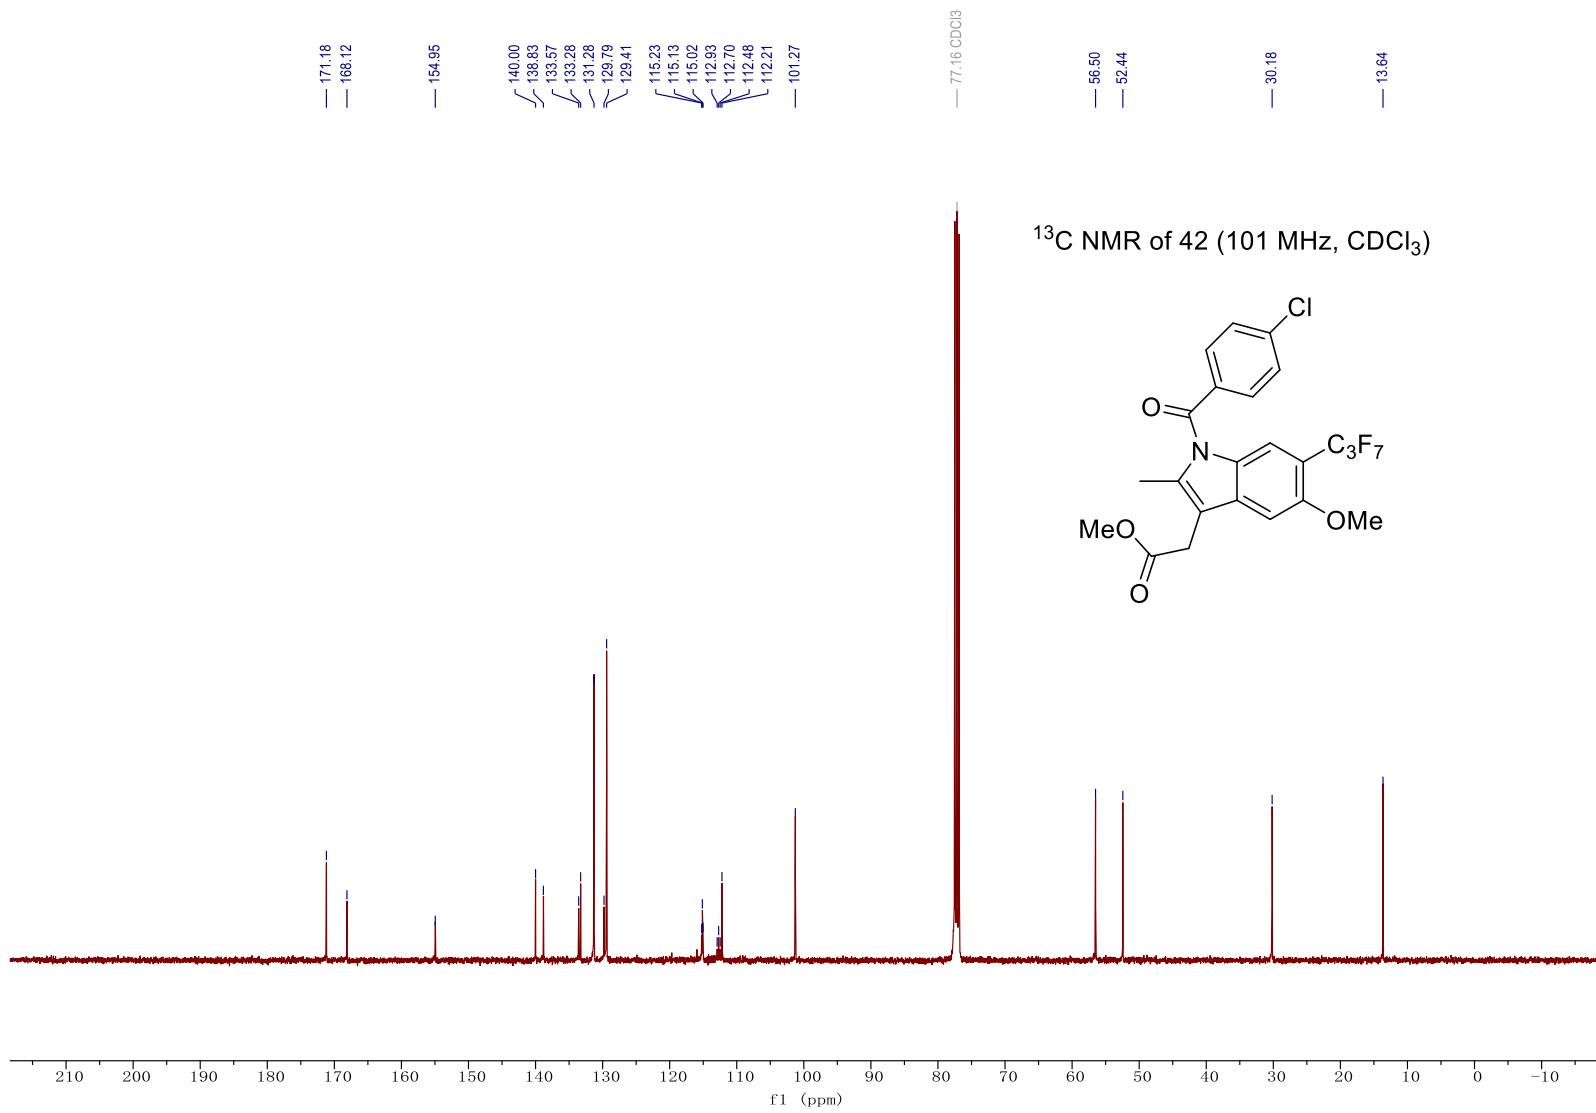

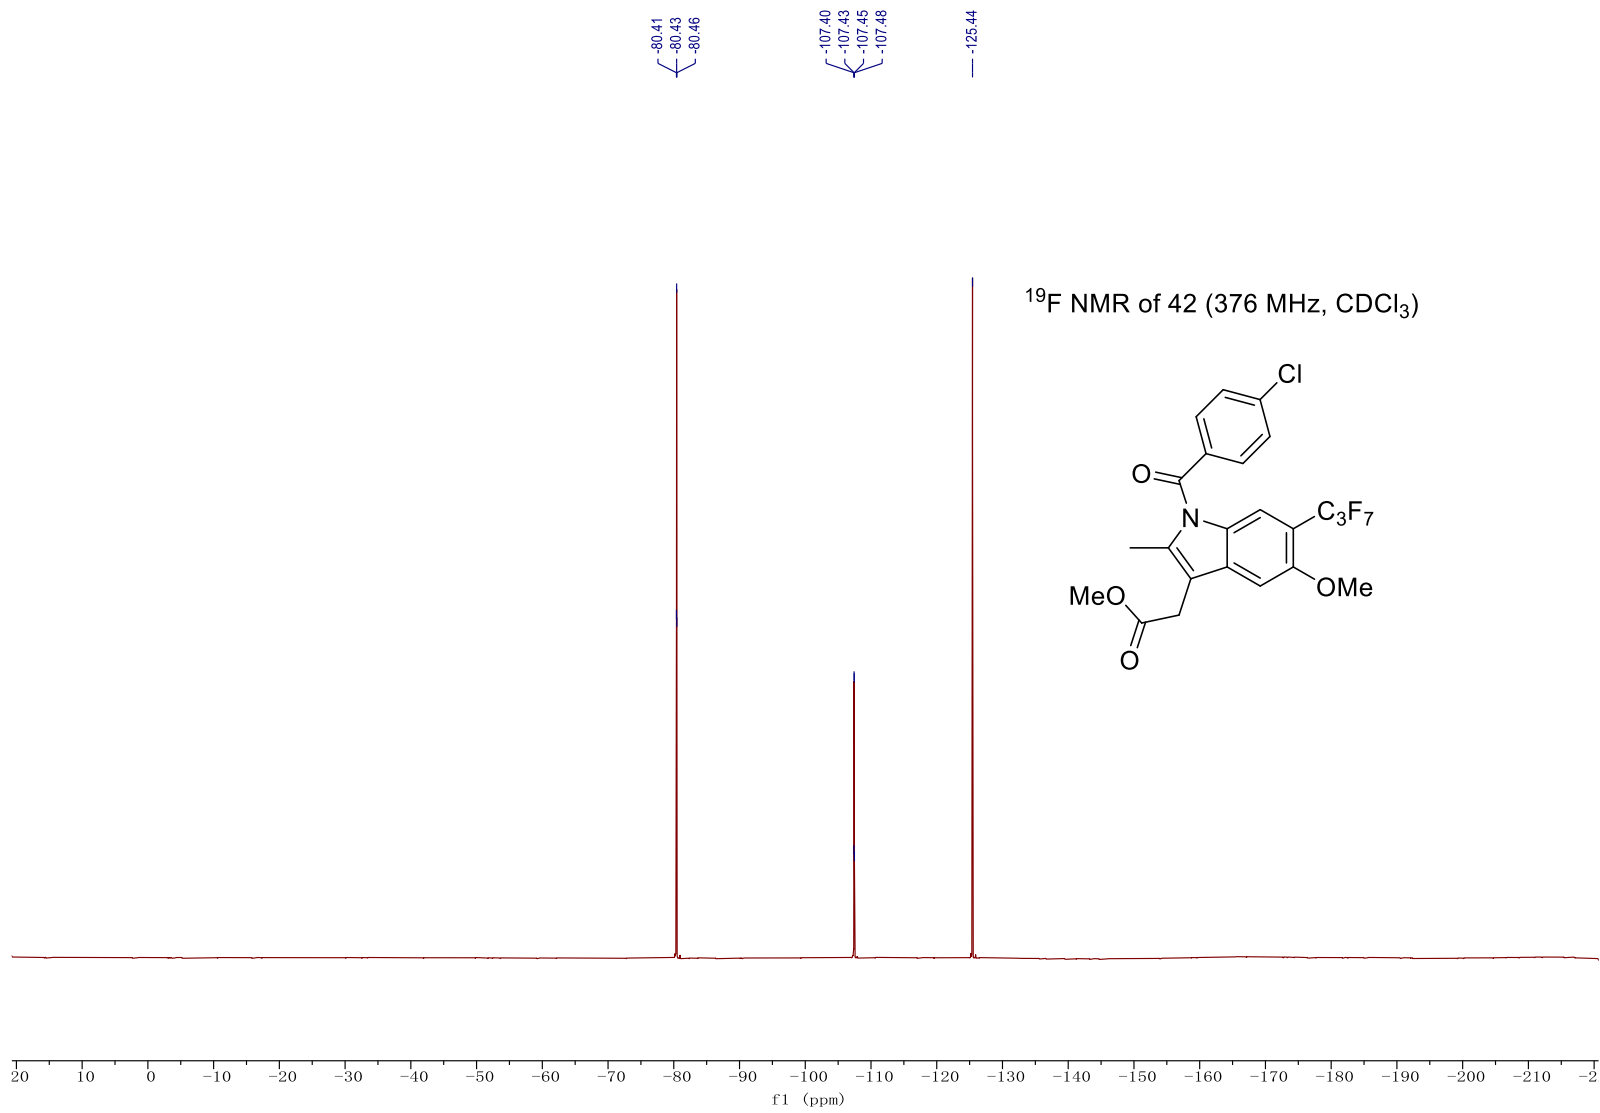

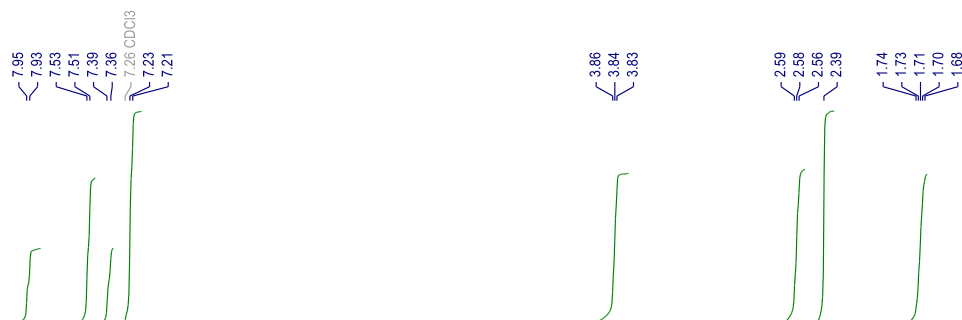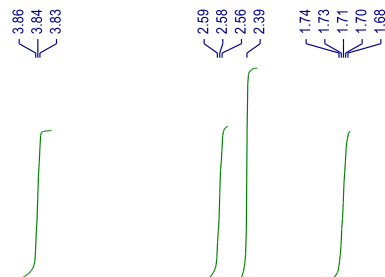

<sup>1</sup>H NMR of 43 (400 MHz, CDCl<sub>3</sub>)

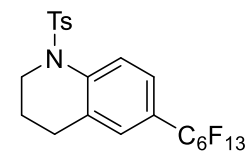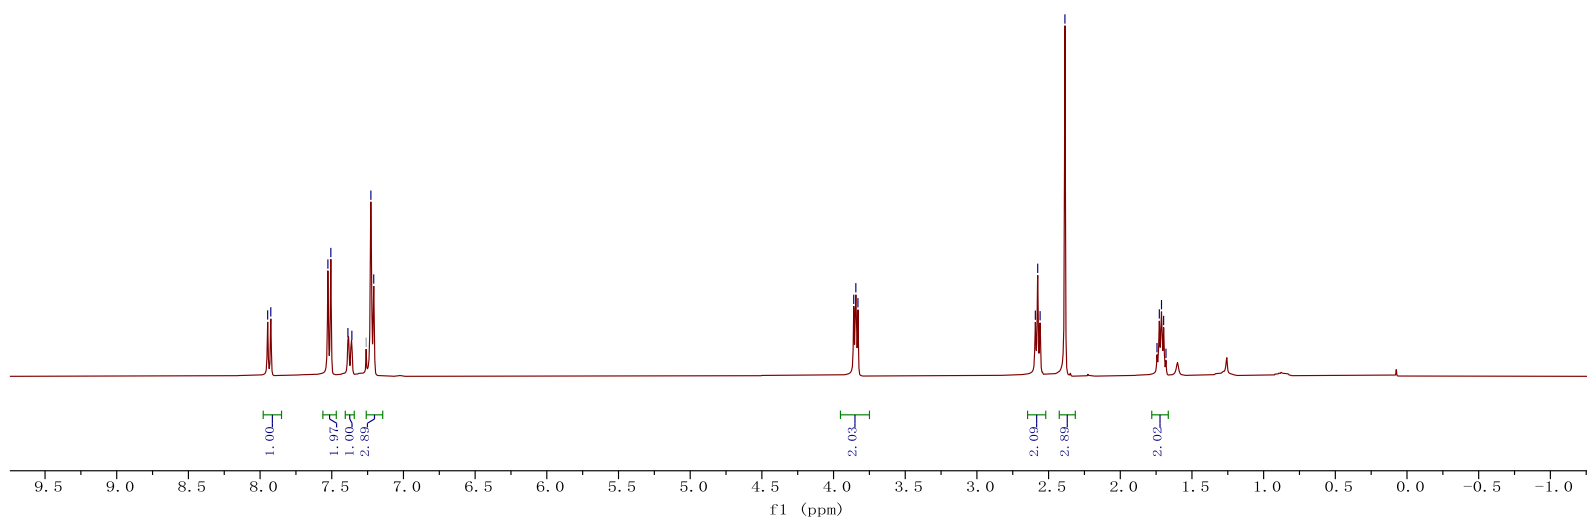

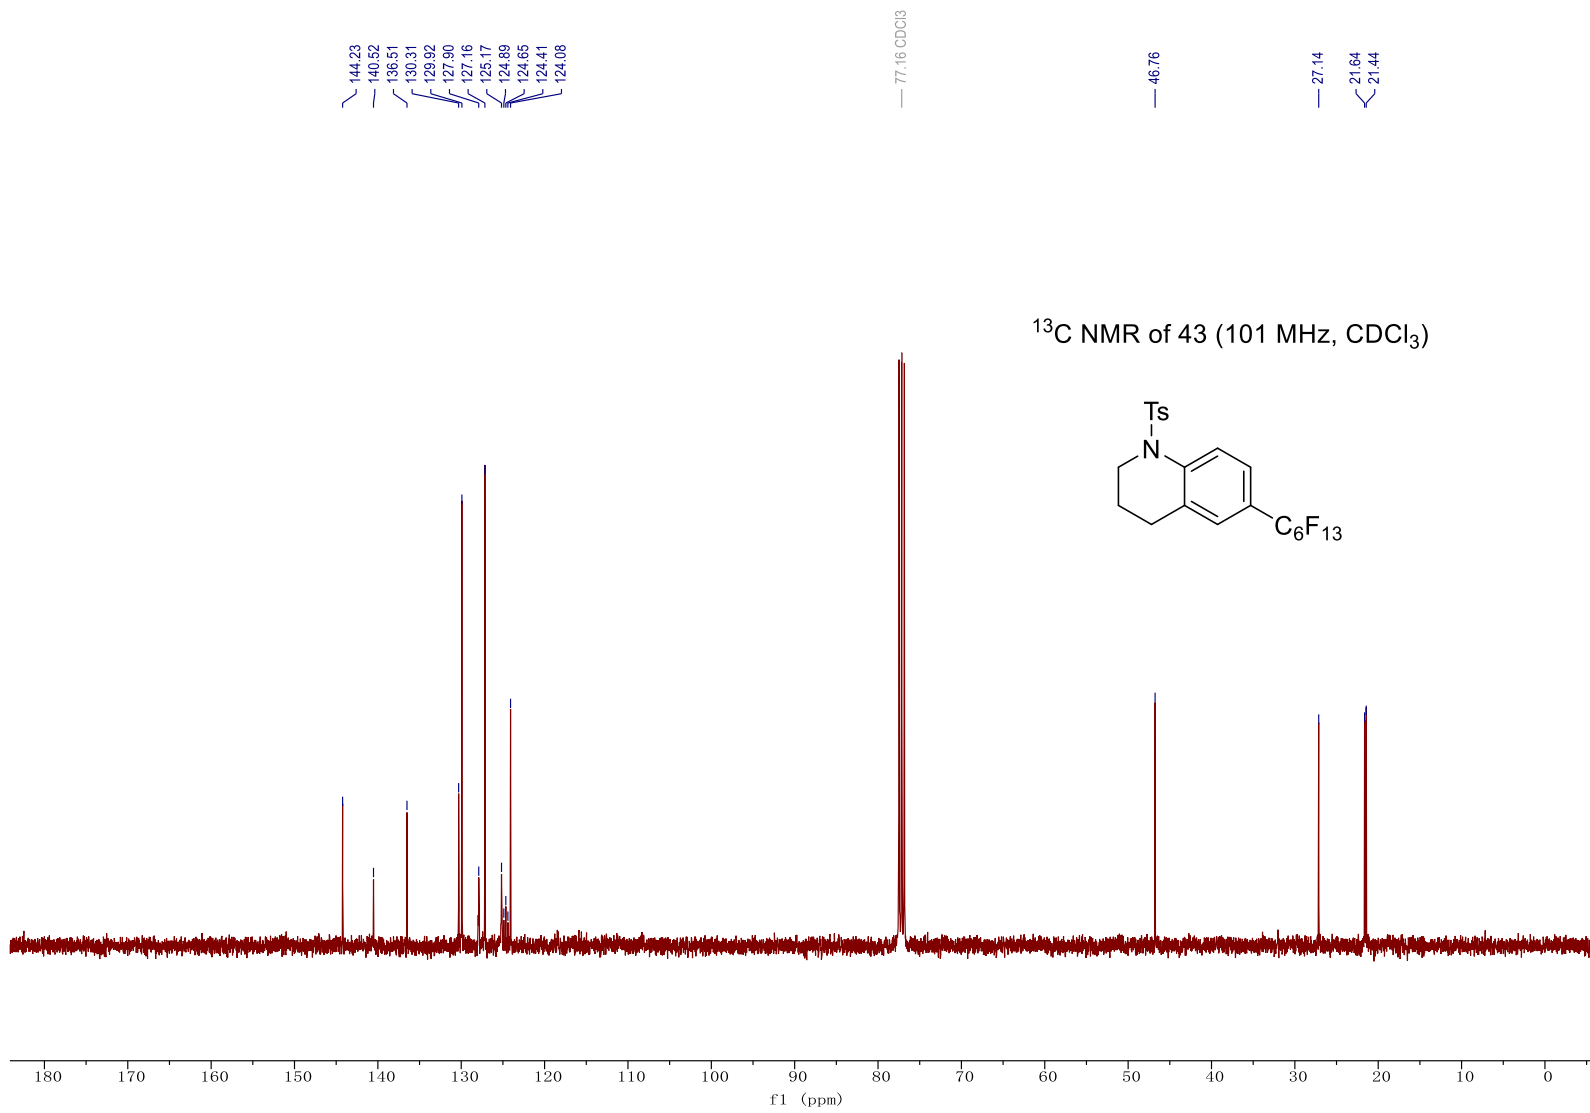

-80.79  
-80.81  
-80.86  
-80.86

-110.42  
-110.46  
-110.50  
-121.48  
-121.52  
-121.55  
-121.93  
-121.94  
-121.95  
-121.97  
-121.98  
-122.82  
-122.83  
-122.84  
-122.87  
-126.14  
-126.15  
-126.19

$^{19}\text{F}$  NMR of 43 (376 MHz,  $\text{CDCl}_3$ )

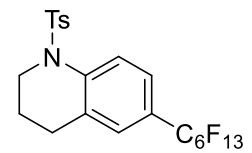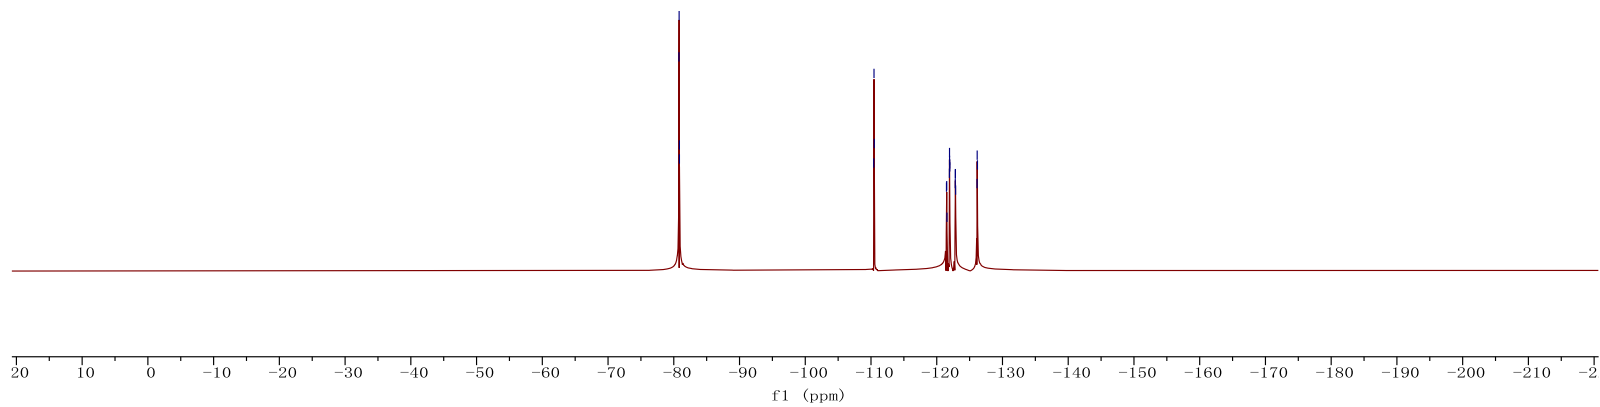

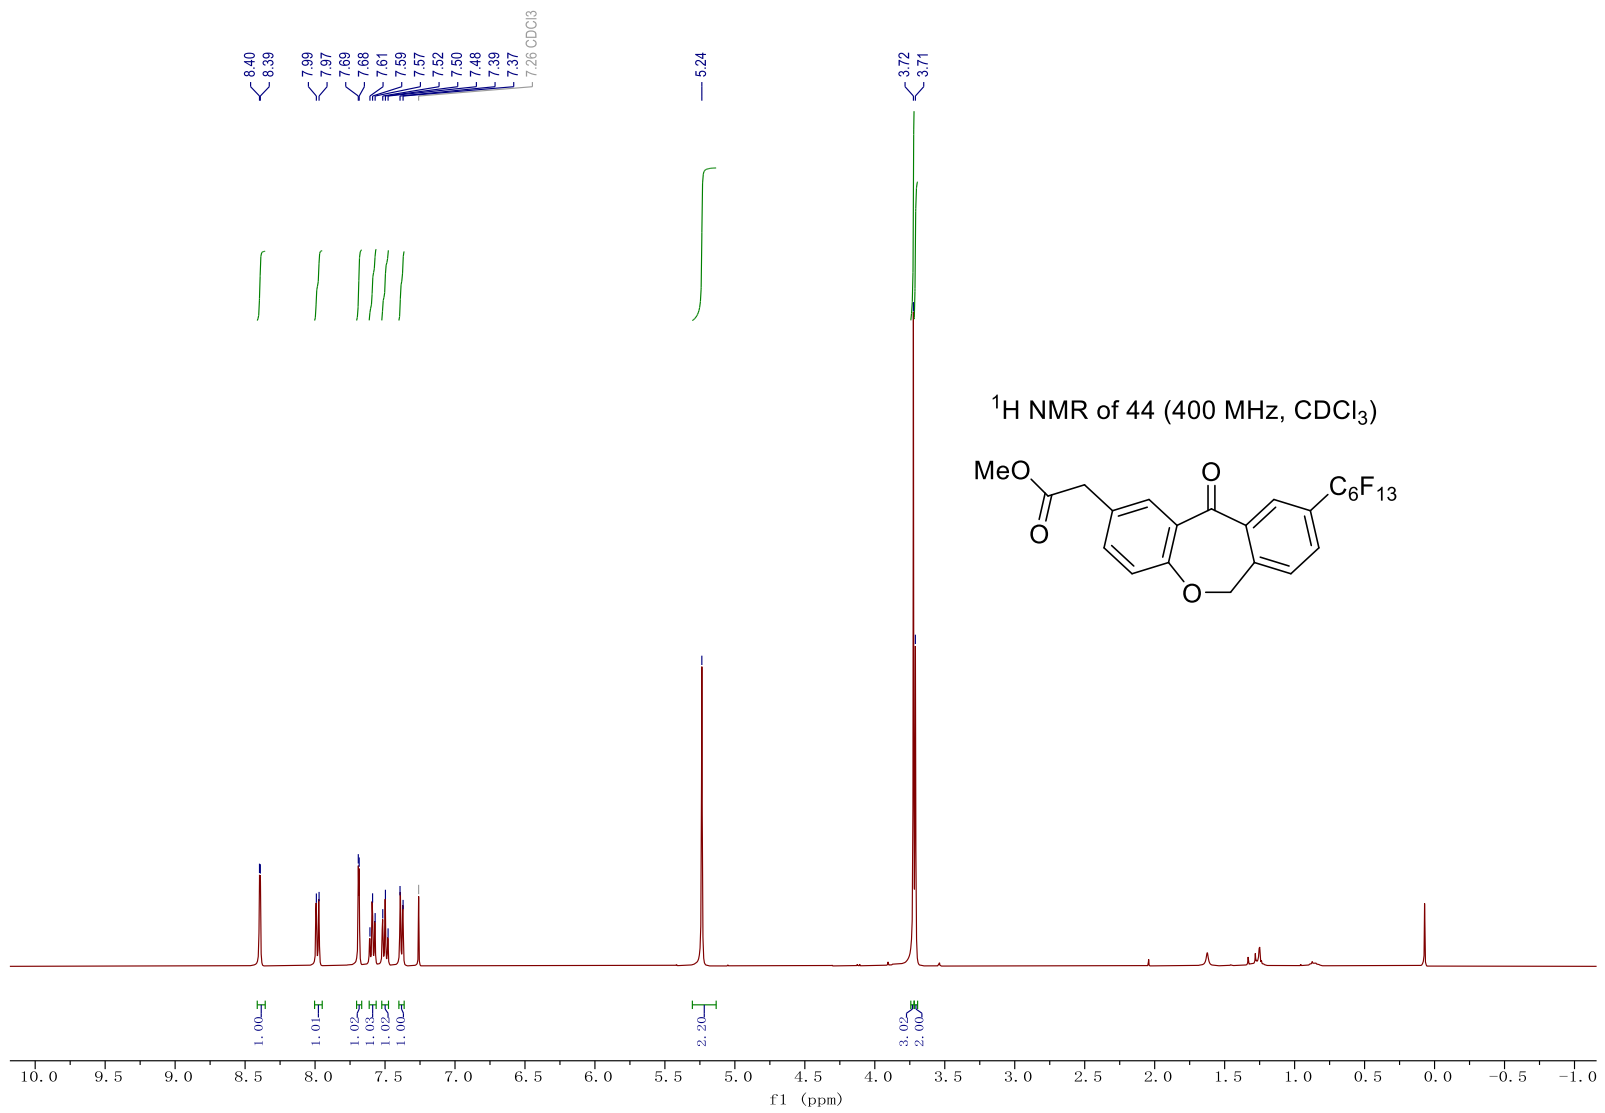

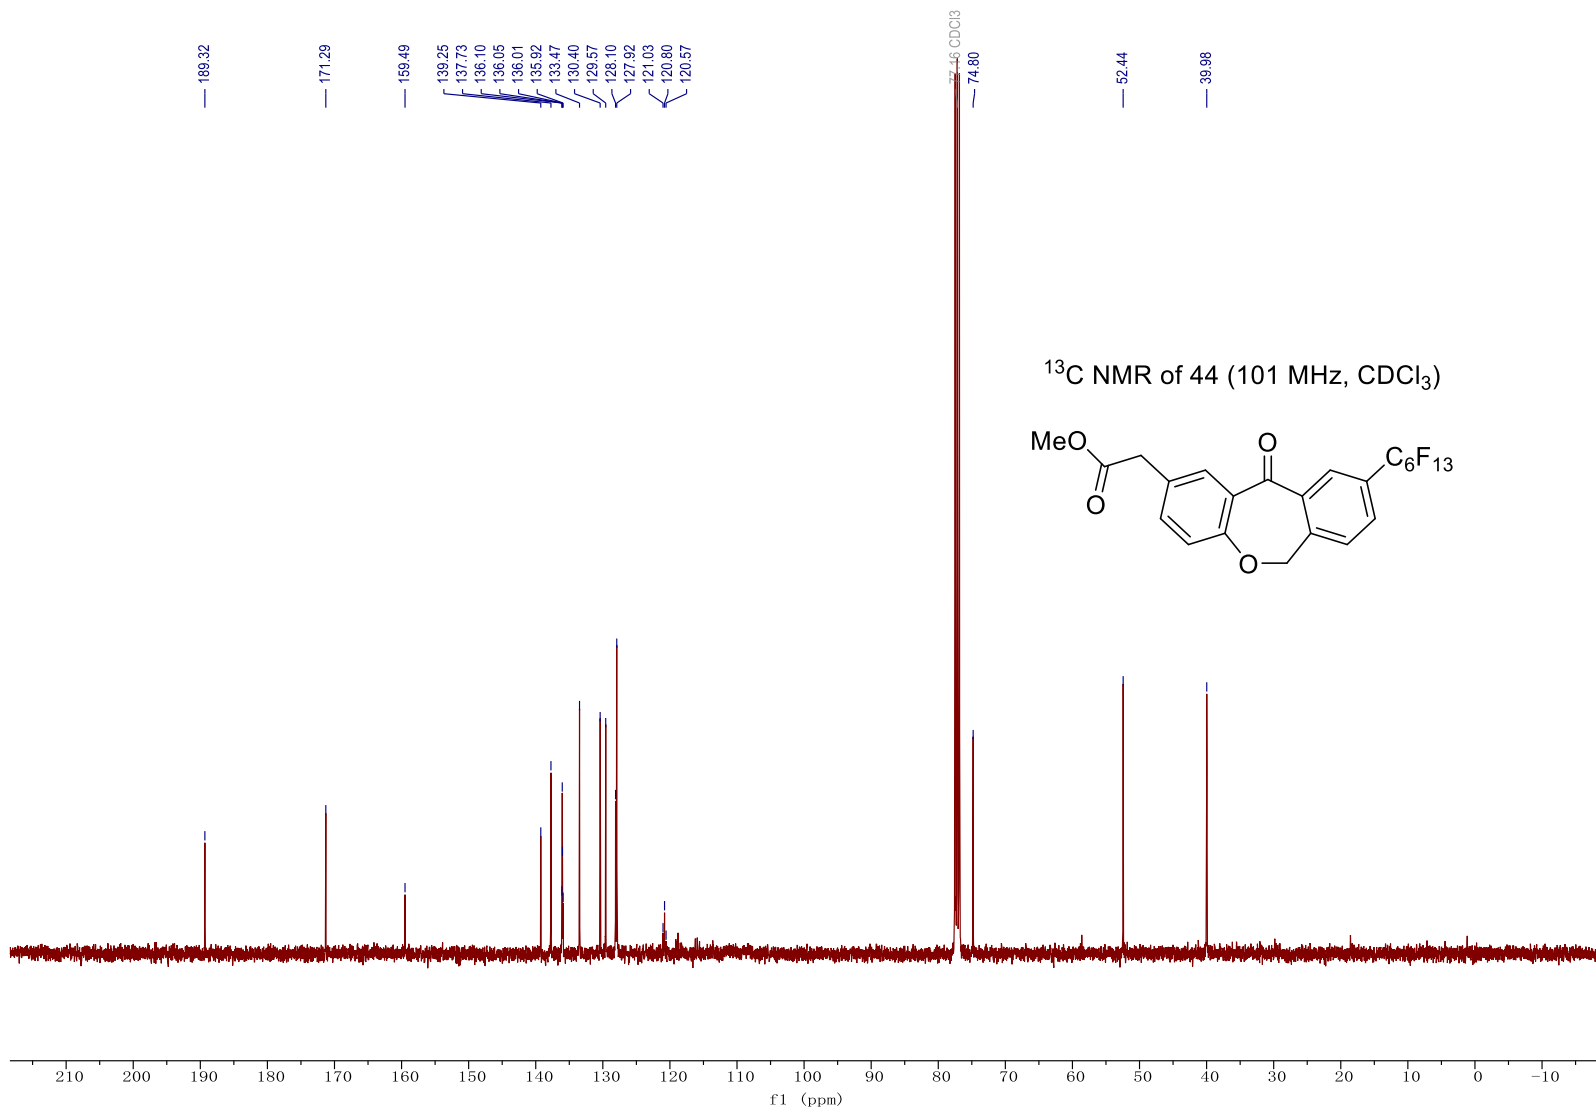

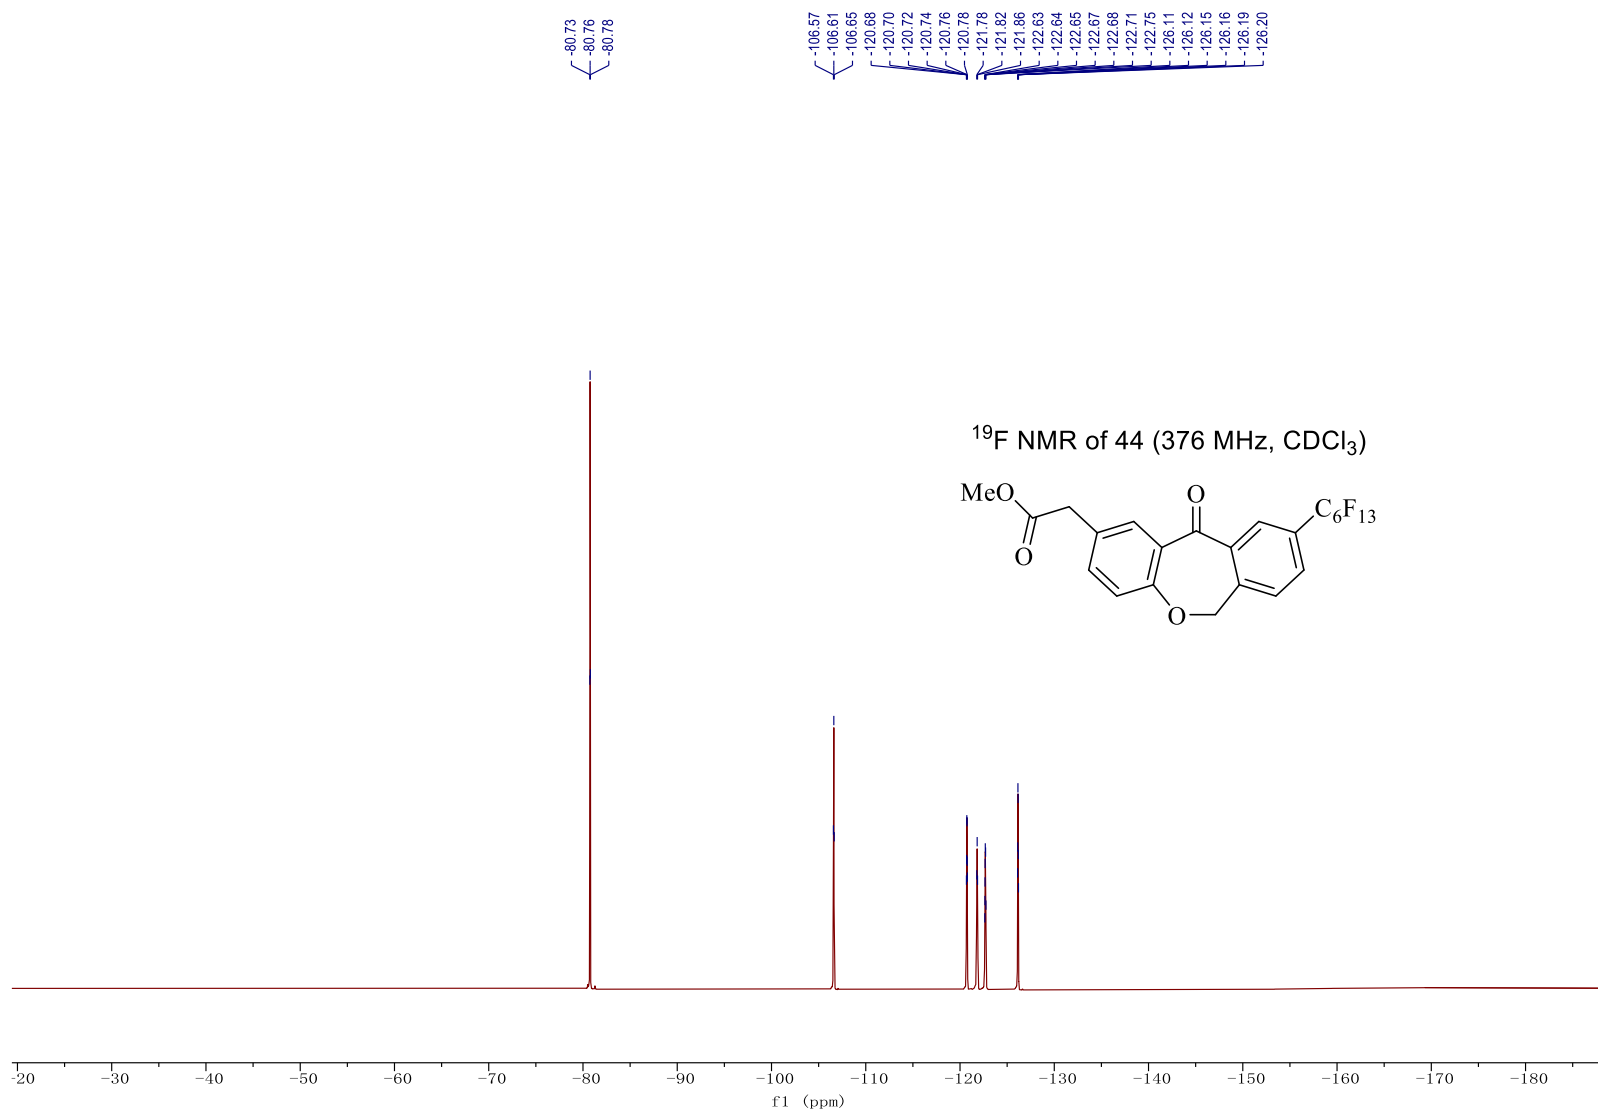

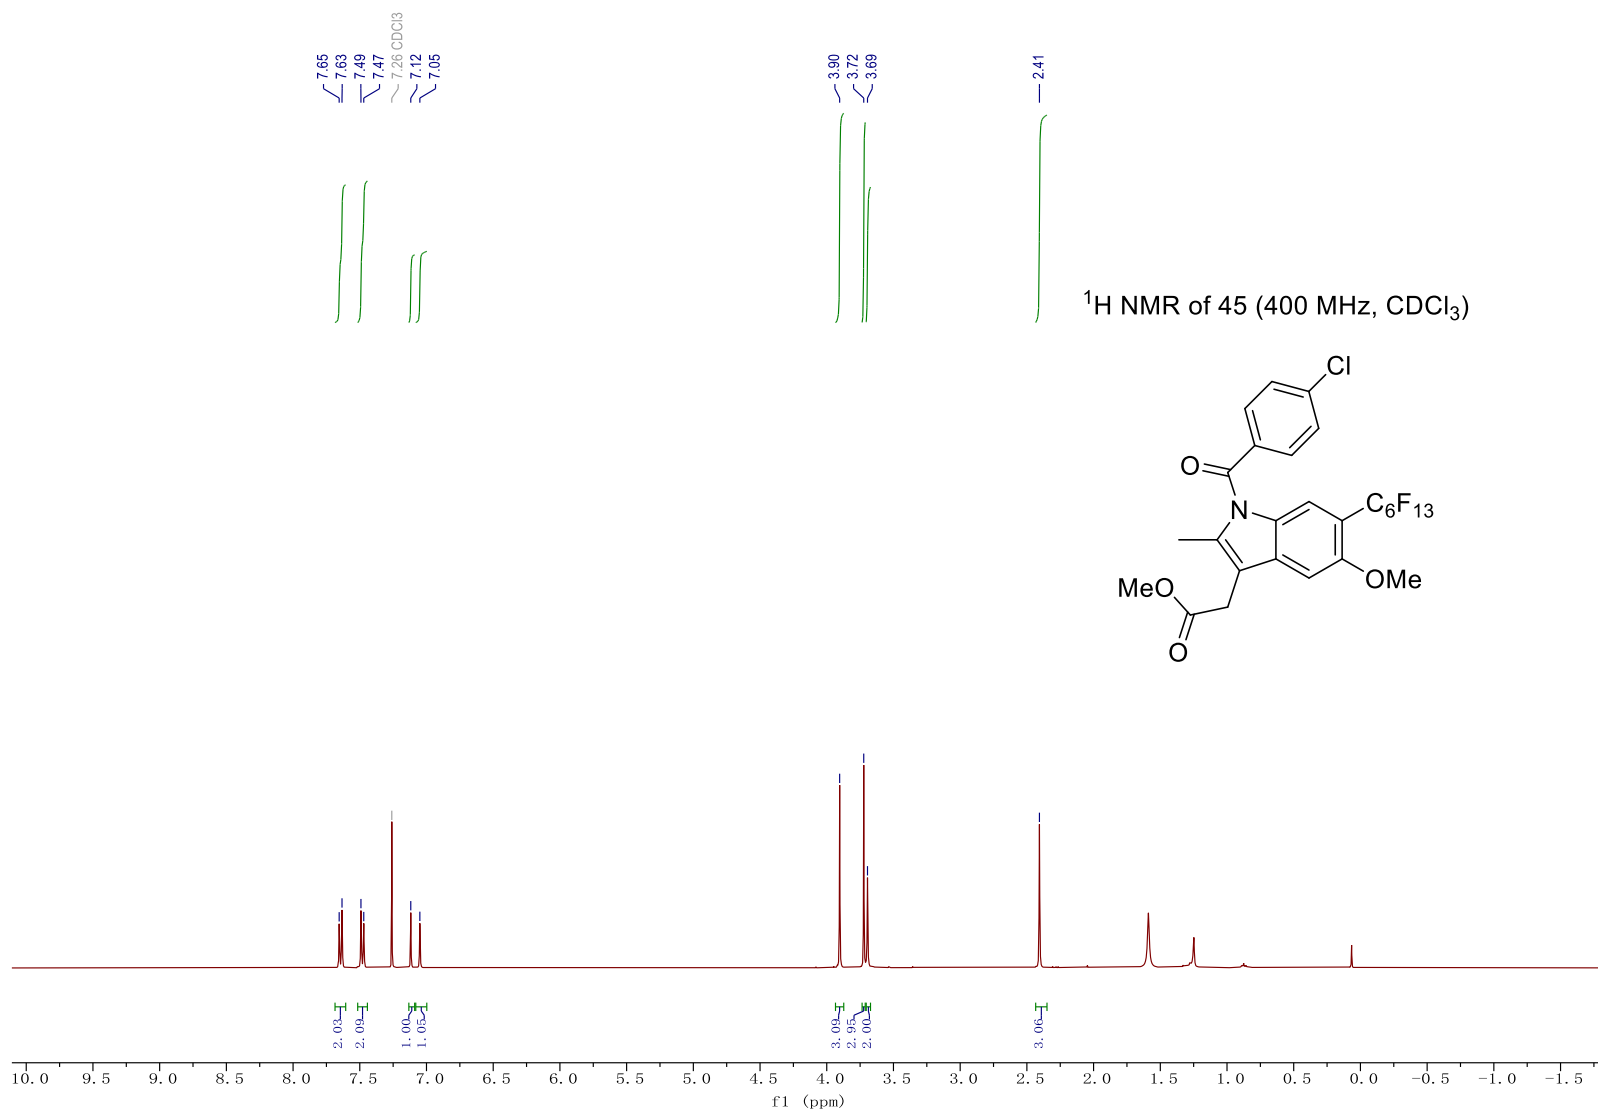

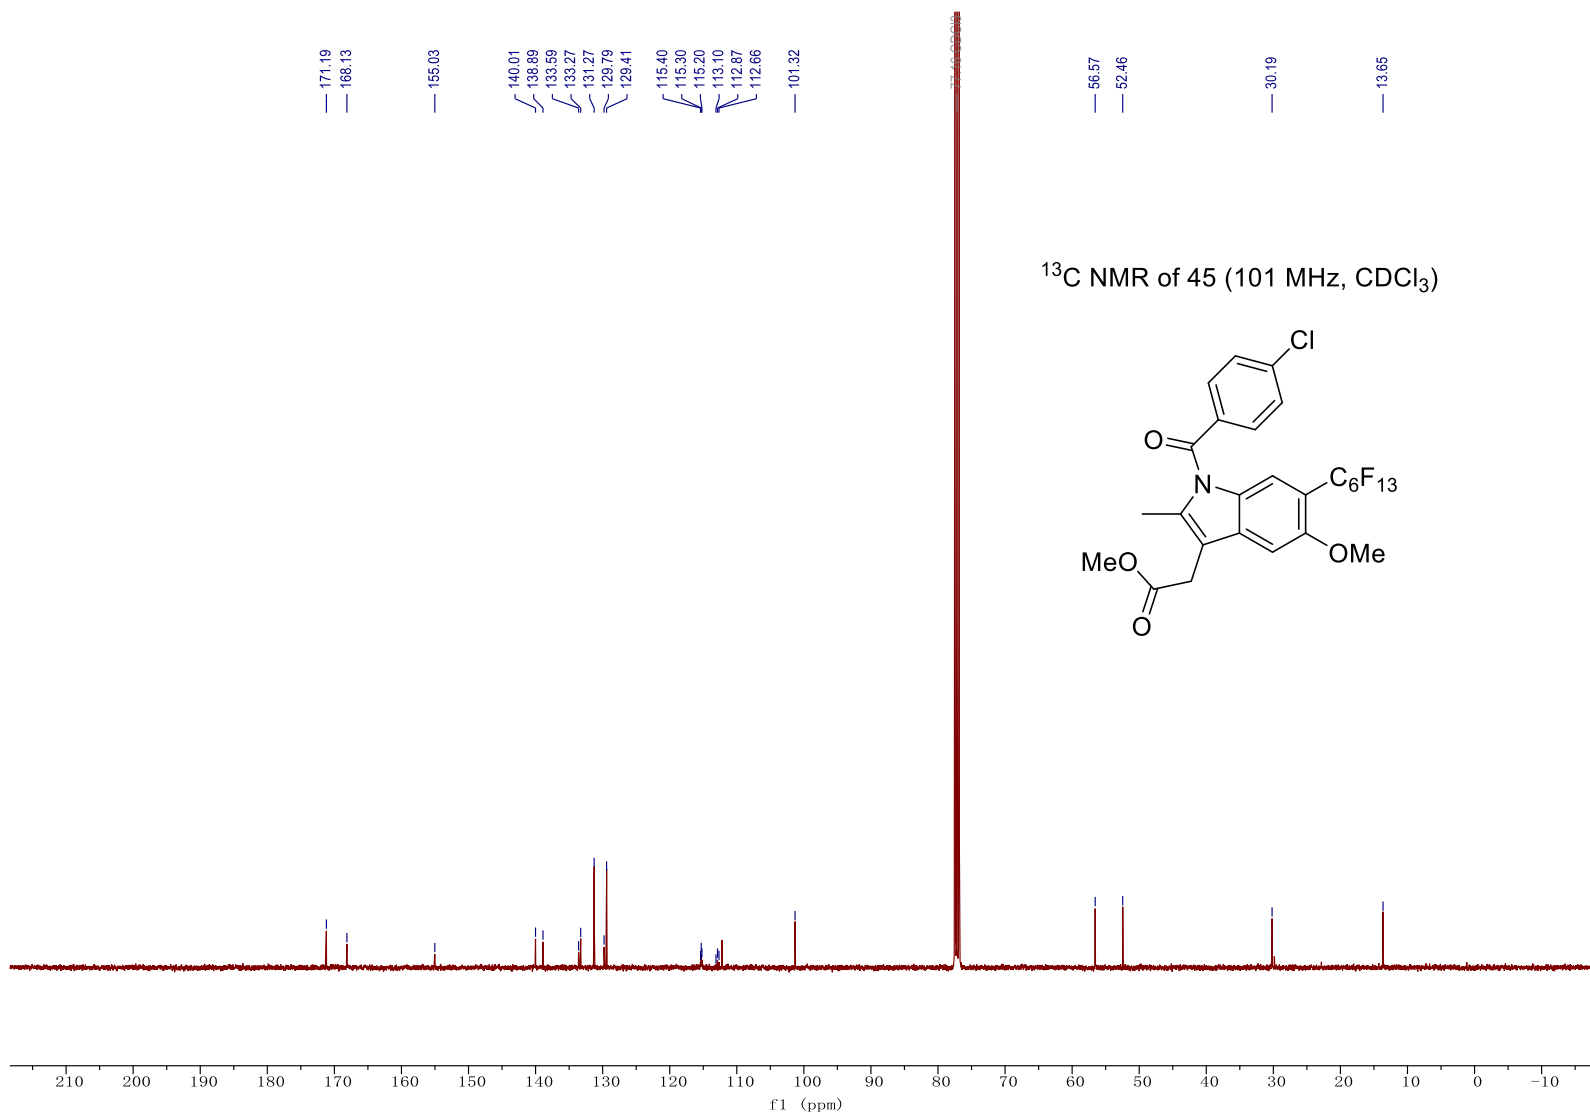

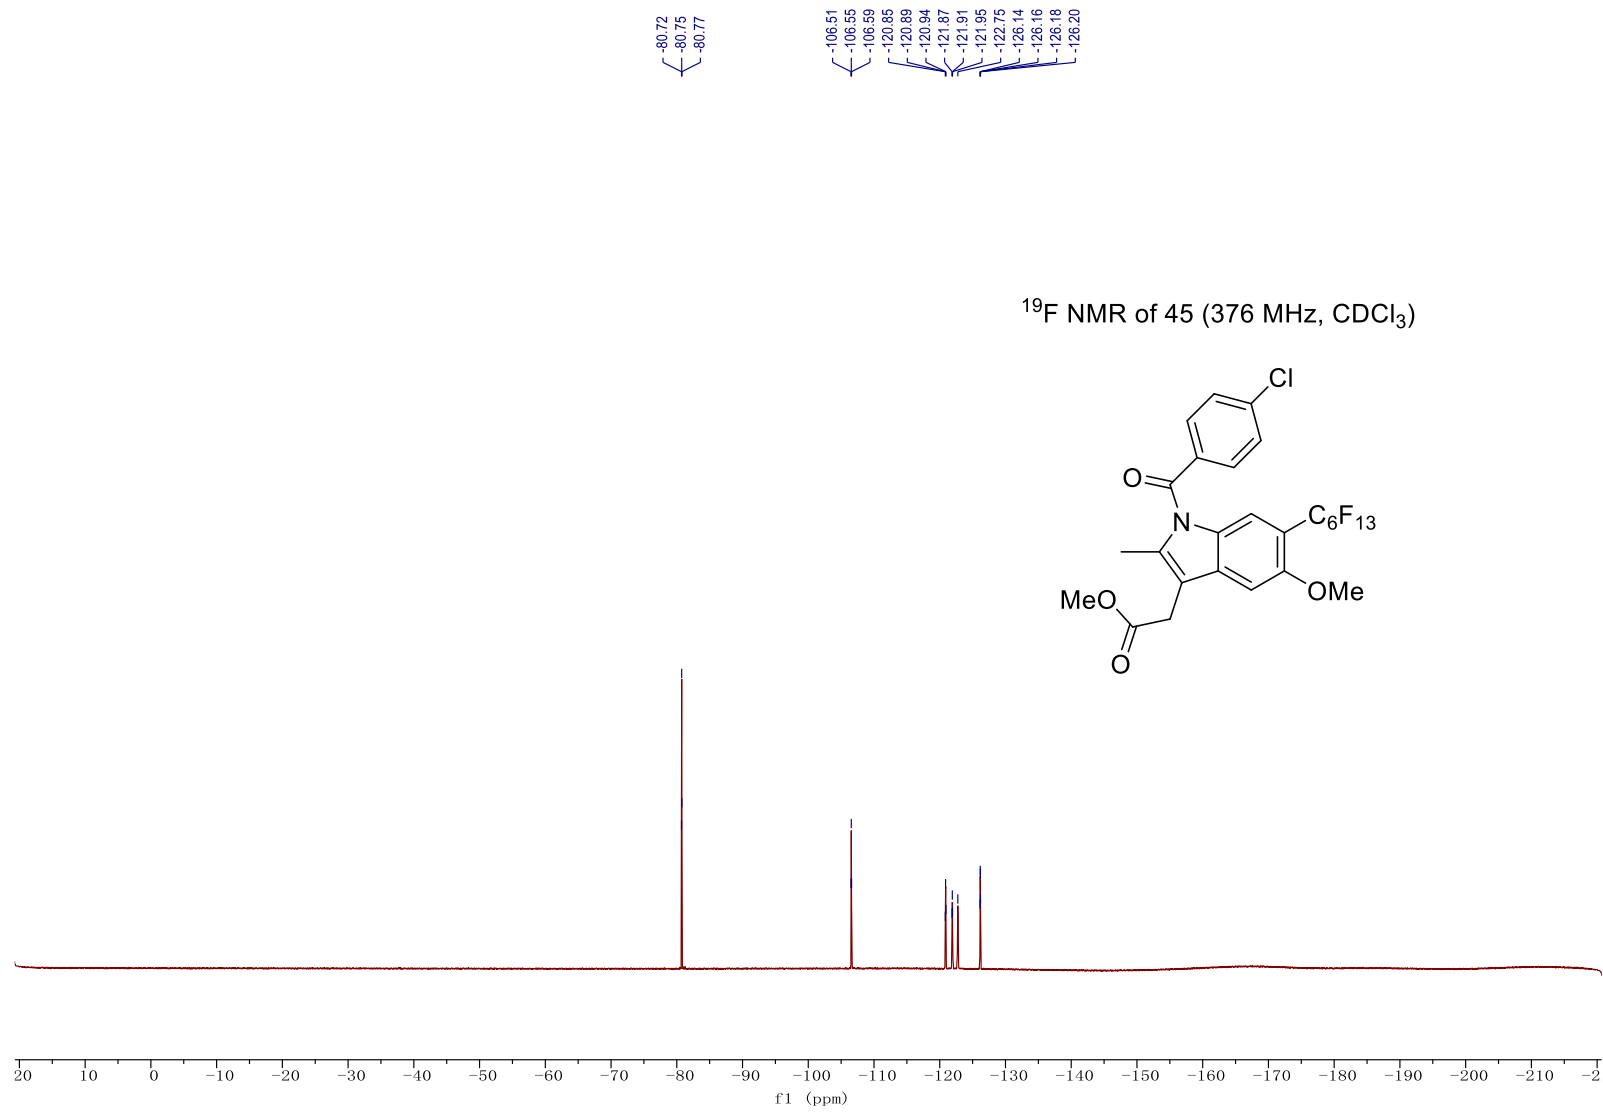

Supplement: d6cc01493c1.pdf [file d6cc01493c1.pdf]
